# Supplementary material for: Chromatin accessibility variation provides insights into missing regulation underlying immune-mediated diseases
Source: eLife. 2025 Dec 15;13:RP98289. doi: 10.7554/eLife.98289 (PMC12705069; doi:10.7554/eLife.98289)
Supplement: Supplementary file 1. [file elife-98289-supp1.xlsx]

## Sheet: Table A
Table A. Colocalization results of LCL caQTLs and IMD GWAS
PPA_3: posterior probability of colocalization
IMD	CHR	BP	ID	Celltype	Peak	Coloc_atac_p	NSNP	start	end	max_abs_Z_IMD	max_abs_Z_ATAC	logBF_1	logBF_2	logBF_3	logBF_4	pi_1	pi_2	pi_3	pi_4	PPA_1	PPA_2	PPA_3	PPA_4
CD_deLange_2017	chr1	8090578	rs72634258	LCL	ATAC_chr1_7993630_7994674	0.9886	352	7991181	8189495	5.32877	4.50206	8.83912	5.37101	14.5392	14.2041	0.00768031	0.00768472	0.526614	0.00845235	4.82409e-05	1.50482e-06	0.9886	0.0113496
CD_deLange_2017	chr1	154420198	rs35402075	LCL	ATAC_chr1_154386598_154387307	0.998229	419	154320506	154520057	4.98616	8.05212	5.69797	25.176	32.9336	30.8338	0.00758614	0.00759242	0.533434	0.00770266	2.10797e-14	6.07344e-06	0.998229	0.00176536
CD_deLange_2017	chr1	154420198	rs35402075	LCL	ATAC_chr1_154404554_154408832	0.996762	419	154320506	154520057	4.98616	4.86609	5.69797	4.78788	11.9928	10.4712	0.0076089	0.00760876	0.532245	0.00781562	2.63018e-05	1.0586e-05	0.996762	0.00319606
CD_deLange_2017	chr1	160862065	rs114802258	LCL	ATAC_chr1_160838897_160839324	0.0121445	456	160762994	160960100	5.84635	4.92339	9.31736	6.10219	15.1422	15.4171	0.00769008	0.00769405	0.0085139	0.526036	3.23966e-05	1.30135e-06	0.0121445	0.987822
CD_deLange_2017	chr1	160862065	rs114802258	LCL	ATAC_chr1_160863805_160864637	0.993035	456	160762994	160960100	5.84635	7.95805	9.31736	24.672	34.7611	33.9812	0.0076418	0.00764587	0.529727	0.00810313	1.2766e-13	5.95256e-07	0.993035	0.00696427
CD_deLange_2017	chr2	24938367	rs4343432	LCL	ATAC_chr2_24926360_24927369	0.997676	470	24839184	25037759	6.9321	9.35969	16.6463	36.424	54.8743	53.0434	0.00760285	0.00759997	0.532977	0.00774617	3.55674e-19	1.38112e-10	0.997676	0.00232394
CD_deLange_2017	chr2	43273665	rs6736400	LCL	ATAC_chr2_43273436_43274106	0.996855	296	43174816	43373582	6.10427	7.46676	12.6826	20.8016	34.9893	33.4532	0.00760643	0.00760665	0.532433	0.00780604	2.92339e-12	9.81579e-09	0.996855	0.00314537
CD_deLange_2017	chr2	43273665	rs6736400	LCL	ATAC_chr2_43293407_43294976	0.996877	296	43174816	43373582	6.10427	4.6684	12.6826	4.55777	18.7736	17.221	0.00761607	0.00760598	0.532362	0.00779651	3.2276e-05	9.54381e-09	0.996877	0.00309055
CD_deLange_2017	chr2	102449062	rs11378157	LCL	ATAC_chr2_102434566_102436708	0.00795449	725	102349411	102549045	7.43784	5.48307	21.3561	9.71379	30.4124	31.069	0.00764751	0.00765574	0.00817846	0.528988	8.67655e-07	7.63189e-12	0.00795449	0.992045
CD_deLange_2017	chr2	198035564	rs1583792	LCL	ATAC_chr2_198035999_198037067	0.00236848	321	197935663	198134502	5.5125	8.07663	9.86564	26.9115	34.9628	36.7761	0.00759842	0.0075991	0.00775534	0.532841	2.92437e-14	7.39572e-07	0.00236848	0.997631
CD_deLange_2017	chr2	198035564	rs1583792	LCL	ATAC_chr2_198041786_198043790	0.991474	321	197935663	198134502	5.5125	8.74359	9.86564	31.222	41.6678	41.0756	0.00765394	0.00765547	0.528607	0.00821771	2.21591e-16	4.17427e-07	0.991474	0.00852571
CD_deLange_2017	chr2	230230963	rs7563433	LCL	ATAC_chr2_230226987_230227880	0.997741	620	230131107	230330373	7.62814	4.7504	21.8556	4.80224	28.512	26.6459	0.00759727	0.00759547	0.53307	0.00773802	1.82836e-05	7.17412e-13	0.997741	0.00224095
CD_deLange_2017	chr2	230230963	rs7563433	LCL	ATAC_chr2_230230198_230230525	0.996763	620	230131107	230330373	7.62814	4.48627	21.8556	2.99412	26.395	24.8406	0.00761846	0.00760252	0.532446	0.00779924	0.000152316	9.78106e-13	0.996763	0.0030851
CD_deLange_2017	chr2	230230963	rs7563433	LCL	ATAC_chr2_230233864_230235315	0.999159	620	230131107	230330373	7.62814	6.92458	21.8556	14.622	39.2767	36.4438	0.00758348	0.00758727	0.534008	0.0076383	3.8554e-10	2.7846e-13	0.999159	0.00084097
CD_deLange_2017	chr2	230230963	rs7563433	LCL	ATAC_chr2_230256760_230258456	0.999073	620	230131107	230330373	7.62814	4.99592	21.8556	5.30275	29.8716	27.1308	0.00758761	0.00757964	0.533914	0.00764066	4.68746e-06	3.03148e-13	0.999073	0.000922433
CD_deLange_2017	chr2	233277353	rs3816234	LCL	ATAC_chr2_233247701_233248180	0.996599	453	233177938	233377207	16.6914	5.40684	130.913	8.20891	140.577	139.115	0.00759874	0.00761745	0.53212	0.00783104	9.04259e-07	4.65292e-60	0.996599	0.00340003
CD_deLange_2017	chr2	233478157	rs745155	LCL	ATAC_chr2_233384001_233386986	0.999998	292	233378185	233577817	6.83696	12.0938	14.801	63.3409	83.1253	73.973	0.00756962	0.00757645	0.534567	0.00757544	3.00759e-32	3.62418e-11	0.999998	1.50171e-06
CD_deLange_2017	chr3	49876272	rs36022378	LCL	ATAC_chr3_49931052_49931264	5.55439e-08	220	49776393	49976036	7.39205	7.96981	20.5951	26.0012	34.1468	46.5964	0.00756962	0.00757645	0.00757544	0.534567	7.22576e-14	1.61106e-11	5.55439e-08	1
CD_deLange_2017	chr3	53099133	rs2581828	LCL	ATAC_chr3_53044401_53047237	0.990486	353	53004287	53198077	5.80864	4.38585	10.1378	5.28429	15.9142	15.4164	0.00767077	0.00766468	0.527963	0.0083031	4.46061e-05	3.47703e-07	0.990486	0.00946882
CD_deLange_2017	chr5	10682118	rs7715399	LCL	ATAC_chr5_10698419_10701460	0.997185	598	10582465	10781518	5.27711	5.82087	6.84683	10.2531	18.7308	17.0867	0.00760479	0.0076045	0.532673	0.00777442	9.8236e-08	2.96205e-06	0.997185	0.00281177
CD_deLange_2017	chr5	40411189	rs6451494	LCL	ATAC_chr5_40410229_40411813	0.995739	512	40311466	40510564	15.7636	4.86789	115.537	5.1292	121.911	120.661	0.00761027	0.00761378	0.531683	0.00789163	2.43144e-05	2.73219e-53	0.995739	0.00423656
CD_deLange_2017	chr5	40411189	rs6451494	LCL	ATAC_chr5_40436332_40438172	0.999055	512	40311466	40510564	15.7636	7.42391	115.537	22.0183	140.251	137.533	0.00758253	0.00758307	0.533833	0.00764543	2.6245e-13	6.37342e-54	0.999055	0.000944841
CD_deLange_2017	chr5	40411189	rs6451494	LCL	ATAC_chr5_40484318_40488133	0.00121092	512	40311466	40510564	15.7636	6.48902	115.537	13.0045	126.07	128.541	0.00758813	0.00758143	0.00766437	0.533733	3.19574e-08	9.43665e-53	0.00121092	0.998789
CD_deLange_2017	chr5	40622838	rs4957138	LCL	ATAC_chr5_40578280_40579615	0.996059	406	40522911	40722822	12.5429	11.9361	70.64	62.193	134.144	132.825	0.00761081	0.00761353	0.531862	0.00787253	3.75398e-30	8.05667e-34	0.996059	0.00394112
CD_deLange_2017	chr5	132435113	rs2188962	LCL	ATAC_chr5_132354129_132355534	0.993137	465	132335443	132534997	12.525	4.91996	69.3684	6.19985	76.3596	75.5639	0.00764079	0.00764465	0.529712	0.00809578	1.31787e-05	4.85661e-33	0.993137	0.0068498
CD_deLange_2017	chr5	132435113	rs2188962	LCL	ATAC_chr5_132429688_132432091	0.999831	465	132335443	132534997	12.525	8.34109	69.3684	26.8464	100.48	96.05	0.00757564	0.00757668	0.534434	0.00759227	4.36482e-16	1.48912e-34	0.999831	0.000169266
CD_deLange_2017	chr5	142146492	rs181826	LCL	ATAC_chr5_142108213_142110501	0.990114	527	142046614	142246069	6.95808	5.92449	18.5164	10.2765	29.2469	28.7886	0.00767186	0.00766615	0.527707	0.00833125	3.14775e-07	8.30102e-11	0.990114	0.00988544
CD_deLange_2017	chr5	150848053	rs9637870	LCL	ATAC_chr5_150800873_150801846	0.993388	387	150749245	150947957	9.30182	6.76463	37.7254	16.6313	55.1789	54.3507	0.00763883	0.00764215	0.529974	0.00807519	3.76636e-10	2.60059e-19	0.993388	0.00661171
CD_deLange_2017	chr5	150848053	rs9637870	LCL	ATAC_chr5_150845690_150847801	0.994167	387	150749245	150947957	9.30182	4.86199	37.7254	7.04158	45.7082	44.7609	0.0076326	0.00763624	0.530382	0.00801744	4.88255e-06	2.30692e-19	0.994167	0.00582767
CD_deLange_2017	chr5	150848053	rs9637870	LCL	ATAC_chr5_150853523_150853997	0.000122225	387	150749245	150947957	9.30182	9.00384	37.7254	33.6221	66.5927	71.3475	0.00757269	0.00757436	0.00758801	0.534518	3.54299e-17	5.85335e-19	0.000122225	0.999878
CD_deLange_2017	chr6	14734110	rs25630	LCL	ATAC_chr6_14719002_14719497	0.998009	313	14634858	14832867	5.4	4.76872	8.64773	5.59928	16.1956	14.2095	0.00759615	0.00759472	0.533216	0.00771903	7.49609e-06	3.5549e-07	0.998009	0.00198271
CD_deLange_2017	chr6	42039665	rs67289879	LCL	ATAC_chr6_42039068_42040406	0.999896	490	41942326	42139374	5.19811	4.92576	5.49877	4.40978	14.4741	9.53608	0.00757312	0.00757469	0.534544	0.00757587	1.79195e-06	6.03222e-07	0.999896	0.000101594
CD_deLange_2017	chr6	90237621	rs36048311	LCL	ATAC_chr6_90251245_90252268	0.988683	257	90139244	90337263	6.12575	17.1191	12.6813	139.41	152.415	152.078	0.00768468	0.00768136	0.526725	0.00844531	2.97492e-63	3.24362e-08	0.988683	0.0113167
CD_deLange_2017	chr6	167019278	rs35171809	LCL	ATAC_chr6_166988595_166990129	0.00336662	516	166919663	167119267	9.84906	10.6787	40.8136	47.0387	86.3814	87.8516	0.00760679	0.00760544	0.00782128	0.532244	5.31212e-23	2.68374e-20	0.00336662	0.996633
CD_deLange_2017	chr6	167019278	rs35171809	LCL	ATAC_chr6_166997442_167000122	0.984965	516	166919663	167119267	9.84906	5.90055	40.8136	10.391	51.2933	51.2025	0.00772173	0.00772154	0.524069	0.00876016	4.07798e-07	2.50078e-20	0.984965	0.0150345
CD_deLange_2017	chr6	167019278	rs35171809	LCL	ATAC_chr6_167020312_167020739	0.99248	516	166919663	167119267	9.84906	12.7154	40.8136	73.8158	115.332	114.623	0.00764817	0.00764841	0.529205	0.00814778	6.21676e-35	1.33743e-20	0.99248	0.00751953
CD_deLange_2017	chr6	167019278	rs35171809	LCL	ATAC_chr6_167098317_167099442	0.000225341	516	166919663	167119267	9.84906	7.54387	40.8136	22.2863	58.9562	63.0999	0.00757738	0.0075735	0.00759253	0.534425	2.96976e-12	2.66819e-20	0.000225341	0.999775
CD_deLange_2017	chr7	74878823	rs2529275	LCL	ATAC_chr7_74916285_74916561	0.0136539	25	74782019	74954591	5.208	4.74352	8.21845	6.48605	14.4803	14.6538	0.00771648	0.00770197	0.00864444	0.525011	2.3251e-05	4.10445e-06	0.0136539	0.986318
CD_deLange_2017	chr7	148706151	rs243541	LCL	ATAC_chr7_148726451_148726730	0.993732	331	148607420	148806001	5.25301	5.99162	7.82136	12.1971	20.8826	20.0035	0.0076367	0.00764572	0.530234	0.00805155	3.04301e-08	2.42201e-06	0.993732	0.00626516
CD_deLange_2017	chr8	125516832	rs4380956	LCL	ATAC_chr8_125527601_125528173	0.999586	351	125419147	125616597	8	13.3203	24.4241	80.3144	108.1	104.562	0.00757942	0.00757427	0.534307	0.00760347	6.48485e-39	1.21455e-14	0.999586	0.000413719
CD_deLange_2017	chr9	114785492	rs10114470	LCL	ATAC_chr9_114805662_114807160	0.997689	306	114685851	114885319	9.53107	6.05694	36.9412	10.7551	49.5113	47.6747	0.007599	0.00760221	0.532988	0.0077464	4.94231e-08	2.09724e-19	0.997689	0.00231086
CD_deLange_2017	chr9	136372044	rs4077515	LCL	ATAC_chr9_136372421_136374081	0.988158	331	136272066	136471068	11.4074	5.15069	57.6067	6.80842	64.7096	64.4112	0.00768665	0.00768697	0.52634	0.00849208	1.18732e-05	1.03078e-27	0.988158	0.0118305
CD_deLange_2017	chr10	35207698	rs1148246	LCL	ATAC_chr10_35184398_35186239	0.991194	363	35109136	35302860	7.92216	9.28448	25.294	38.1119	63.9611	63.3971	0.00765503	0.00765753	0.528381	0.00825129	2.31339e-19	8.53351e-14	0.991194	0.0088056
CD_deLange_2017	chr10	62679011	rs10822050	LCL	ATAC_chr10_62687270_62687639	0.998179	376	62579087	62778519	11.2778	4.41937	54.9568	1.84633	58.9955	56.7793	0.00760413	0.00759191	0.533446	0.00769536	0.000250712	2.15225e-27	0.998179	0.00156991
CD_deLange_2017	chr10	73895870	rs2675670	LCL	ATAC_chr10_73857320_73857796	0.992646	218	73799109	73995819	6.67081	15.1698	16.055	107.2	123.961	123.233	0.0076447	0.00765011	0.529435	0.00812766	1.96463e-49	7.54209e-10	0.992646	0.00735429
CD_deLange_2017	chr10	79282718	rs1250573	LCL	ATAC_chr10_79240949_79252037	0.005558	396	79182863	79382609	8.50279	4.96297	27.4656	5.31582	31.7887	32.7803	0.00763905	0.00763231	0.0079951	0.530646	7.04114e-05	1.68932e-14	0.005558	0.994372
CD_deLange_2017	chr10	79282718	rs1250573	LCL	ATAC_chr10_79265503_79268691	0.00540036	396	79182863	79382609	8.50279	4.3268	27.4656	2.44801	28.8927	29.9126	0.00772405	0.0076416	0.00798813	0.529885	0.00125327	1.69185e-14	0.00540036	0.993346
CD_deLange_2017	chr10	80511585	rs1870148	LCL	ATAC_chr10_80492790_80494607	0.99918	502	80411670	80611556	6.55825	6.96543	13.764	17.3162	33.8799	31.0223	0.00758391	0.00758174	0.534066	0.00763476	2.60423e-11	9.08367e-10	0.99918	0.000819942
CD_deLange_2017	chr10	99526738	rs6584282	LCL	ATAC_chr10_99532339_99533427	0.991031	508	99427559	99626710	10.3625	4.8581	46.3241	5.72165	52.5916	52.042	0.00766574	0.00766421	0.528212	0.00825758	2.72841e-05	6.34442e-23	0.991031	0.00894188
CD_deLange_2017	chr10	99526738	rs6584282	LCL	ATAC_chr10_99555509_99556783	0.000790616	508	99427559	99626710	10.3625	8.14593	46.3241	24.4122	67.8421	70.7362	0.00758201	0.00758315	0.00763427	0.534072	3.54676e-13	1.08056e-22	0.000790616	0.999209
CD_deLange_2017	chr12	68191455	rs11177092	LCL	ATAC_chr12_68236189_68238146	0.995275	545	68091912	68289498	5.09938	4.24171	6.21472	3.27095	10.6644	9.47847	0.00763536	0.00761762	0.53125	0.00791516	0.000167102	8.78036e-06	0.995275	0.00452941
CD_deLange_2017	chr14	87951173	rs3850378	LCL	ATAC_chr14_87998462_87999763	0.997723	629	87852273	88050993	7.45318	10.3319	19.9236	44.3802	66.1399	64.29	0.00759593	0.00759819	0.533011	0.00773551	1.20609e-22	5.04532e-12	0.997723	0.00227702
CD_deLange_2017	chr14	103406988	rs7157631	LCL	ATAC_chr14_103427556_103428058	0.995112	414	103307790	103506653	5.21893	6.28426	7.81072	14.105	23.0164	21.9035	0.00762366	0.00762403	0.53121	0.00793766	3.55653e-09	1.92582e-06	0.995112	0.00488599
CD_deLange_2017	chr16	10871740	rs6416647	LCL	ATAC_chr16_10866552_10872027	0.995508	369	10771919	10971450	5.6573	4.92593	8.51563	4.54399	14.2512	13.0472	0.00762114	0.00761441	0.531407	0.00790852	4.60996e-05	8.67865e-07	0.995508	0.00444434
CD_deLange_2017	chr16	11251046	rs2021511	LCL	ATAC_chr16_11286597_11287058	0.997319	636	11151542	11350869	5.94505	8.18591	9.99534	26.2593	37.9296	36.239	0.00759159	0.00760454	0.532877	0.00776765	1.04913e-14	1.216e-07	0.997319	0.0026809
CD_deLange_2017	chr16	11251046	rs2021511	LCL	ATAC_chr16_11307865_11309419	0.997171	636	11151542	11350869	5.94505	4.84354	9.99534	5.39578	17.0232	15.38	0.00760394	0.00759862	0.532515	0.00777761	1.2627e-05	1.26893e-07	0.997171	0.00281596
CD_deLange_2017	chr16	11251046	rs2021511	LCL	ATAC_chr16_11309734_11311587	0.997463	636	11151542	11350869	5.94505	8.37027	9.99534	26.6113	38.3377	36.5925	0.00760245	0.00760141	0.532809	0.00776163	6.98778e-15	1.14947e-07	0.997463	0.0025372
CD_deLange_2017	chr16	11633718	rs9646269	LCL	ATAC_chr16_11612113_11614249	0.994552	557	11533731	11733690	5.0495	10.9803	5.97088	52.4025	59.3745	58.3627	0.00762902	0.00762773	0.530723	0.00797744	9.16923e-26	1.34044e-05	0.994552	0.00543488
CD_deLange_2017	chr16	28483100	rs42861	LCL	ATAC_chr16_28426089_28426622	0.0104918	143	28462144	28582276	7.44311	5.9739	21.4679	13.0803	34.1355	34.5412	0.00767651	0.00767479	0.00838795	0.527284	3.02606e-08	6.88824e-12	0.0104918	0.989508
CD_deLange_2017	chr16	85984057	rs17445836	LCL	ATAC_chr16_85983281_85986388	0.999608	711	85884217	86084012	5.20874	5.32367	5.61345	5.65762	14.785	11.1862	0.00757868	0.00757442	0.534303	0.00760107	1.47389e-06	1.53959e-06	0.999608	0.000388999
CD_deLange_2017	chr17	39887396	rs12936409	LCL	ATAC_chr17_39915643_39915912	4.65236e-05	279	39793671	39987295	8.93082	6.61056	33.7129	16.2717	44.265	49.9846	0.0075745	0.00757634	0.00758076	0.53457	1.21514e-09	3.23667e-17	4.65236e-05	0.999953
CD_deLange_2017	chr17	39887396	rs12936409	LCL	ATAC_chr17_39920149_39921796	0.997861	279	39793671	39987295	8.93082	6.77627	33.7129	16.9336	52.5267	50.6148	0.00759641	0.00758903	0.533095	0.00773173	9.59729e-11	4.94965e-18	0.997861	0.00213894
CD_deLange_2017	chr17	39887396	rs12936409	LCL	ATAC_chr17_39938036_39938472	0.00184185	279	39793671	39987295	8.93082	4.83096	33.7129	5.90359	37.5575	39.6161	0.00759316	0.00759484	0.00770963	0.533233	3.88144e-05	3.2482e-17	0.00184185	0.998119
CD_deLange_2017	chr17	42362183	rs744166	LCL	ATAC_chr17_42363874_42364172	0.0105222	344	42266197	42461423	7.05556	4.75526	17.5107	5.56808	22.6745	23.076	0.00768137	0.00767583	0.00837611	0.527163	5.51948e-05	3.58889e-10	0.0105222	0.989423
CD_deLange_2017	chr17	59875872	rs2526355	LCL	ATAC_chr17_59848584_59849531	0.99624	256	59776341	59975394	4.9	5.15202	6.68806	8.40223	16.4306	15.0652	0.0076154	0.00761323	0.531892	0.0078526	8.37723e-07	4.64975e-06	0.99624	0.00375446
CD_deLange_2017	chr19	33262294	rs62126620	LCL	ATAC_chr19_33260755_33261277	0.998485	527	33162303	33361807	7.16418	8.65658	17.5345	27.8632	47.6165	45.3658	0.00758902	0.00758837	0.533594	0.00768894	1.22428e-15	3.74566e-11	0.998485	0.0015154
IBD_deLange_2017	chr1	1790040	rs2272908	LCL	ATAC_chr1_1847693_1848321	0.994432	225	1694167	1888667	5.248	8.07559	7.99265	26.7448	35.7022	34.7123	0.00763061	0.00762441	0.530663	0.00799339	1.32189e-14	1.83998e-06	0.994432	0.00556622
IBD_deLange_2017	chr1	46356475	rs112124254	LCL	ATAC_chr1_46347931_46348538	0.0108828	388	46256717	46456330	5.00613	6.65913	3.99401	14.3613	17.98	18.3523	0.00767837	0.00769663	0.00841322	0.526826	8.37521e-09	0.000266988	0.0108828	0.98885
IBD_deLange_2017	chr1	150925201	rs72704682	LCL	ATAC_chr1_150925486_150926850	0.99347	239	150825272	151023905	5.28462	4.43311	8.34135	5.53935	14.7115	13.8674	0.00763831	0.00763497	0.530018	0.00806993	2.45104e-05	1.48685e-06	0.99347	0.00650386
IBD_deLange_2017	chr1	155194689	rs12411216	LCL	ATAC_chr1_155188723_155191816	0.00227693	241	155094807	155292822	6.5873	6.40024	14.3415	14.8291	27.3195	29.1695	0.00759593	0.00759819	0.00773551	0.533011	5.16594e-09	8.4148e-09	0.00227693	0.997723
IBD_deLange_2017	chr1	155194689	rs12411216	LCL	ATAC_chr1_155226415_155228276	0.996574	241	155094807	155292822	6.5873	4.61728	14.3415	5.65871	21.4312	19.9746	0.00760434	0.00760803	0.532214	0.0078245	1.1871e-05	2.01284e-09	0.996574	0.00341441
IBD_deLange_2017	chr1	160881744	rs7532133	LCL	ATAC_chr1_160838897_160839324	0.00300163	528	160783249	160981733	5.88806	4.92339	10.5341	5.95599	14.9071	16.4895	0.00760139	0.00760491	0.00780226	0.532516	3.68855e-05	3.79141e-07	0.00300163	0.996961
IBD_deLange_2017	chr1	160881744	rs7532133	LCL	ATAC_chr1_160863805_160864637	0.00972103	528	160783249	160981733	5.88806	7.95805	10.5341	24.5254	34.5829	35.0572	0.00766631	0.0076665	0.00832498	0.527749	3.21866e-13	3.83713e-07	0.00972103	0.990279
IBD_deLange_2017	chr1	169632871	rs6666554	LCL	ATAC_chr1_169666855_169668239	0.000150414	663	169533295	169732763	4.904	6.24532	5.44425	13.8102	14.7072	19.2544	0.00757747	0.00758171	0.00758788	0.534419	1.42516e-08	6.12918e-05	0.000150414	0.999788
IBD_deLange_2017	chr1	200905101	rs35730213	LCL	ATAC_chr1_200905415_200906301	0.98449	386	200805405	201003326	9.61429	4.60347	38.6888	2.75584	41.5533	41.4417	0.0077736	0.00771969	0.523744	0.00872956	0.000833019	2.05194e-19	0.98449	0.0146766
IBD_deLange_2017	chr1	209797265	rs59043219	LCL	ATAC_chr1_209827281_209828650	0.995042	416	209697571	209895609	5.72093	4.59568	9.73543	2.77461	13.654	12.4974	0.00764146	0.00761617	0.531125	0.00792779	0.000284457	2.68861e-07	0.995042	0.00467194
IBD_deLange_2017	chr1	234599210	rs10910476	LCL	ATAC_chr1_234599509_234602236	0.9998	457	234499409	234698534	5.37984	4.10365	5.79828	1.45867	11.6034	7.0475	0.00757912	0.00757865	0.534447	0.00758915	4.27065e-05	5.56932e-07	0.9998	0.000149142
IBD_deLange_2017	chr2	24972708	rs76286777	LCL	ATAC_chr2_24926360_24927369	0.997339	431	24873637	25071549	6.59603	9.35969	15.142	36.5106	53.3203	51.6229	0.00758845	0.00760536	0.532851	0.00776297	3.7304e-19	7.12879e-10	0.997339	0.00266134
IBD_deLange_2017	chr2	43224818	rs149290349	LCL	ATAC_chr2_43273436_43274106	0.00899239	337	43125749	43324277	6.55365	7.46676	13.8609	20.6719	33.9838	34.5286	0.00765769	0.00765522	0.00826587	0.528299	1.51846e-11	1.37801e-08	0.00899239	0.991008
IBD_deLange_2017	chr2	43224818	rs149290349	LCL	ATAC_chr2_43293407_43294976	0.988705	337	43125749	43324277	6.55365	4.6684	13.8609	4.36441	18.5696	18.2197	0.00769098	0.00767854	0.526588	0.008437	0.000130196	9.76433e-09	0.988705	0.0111647
IBD_deLange_2017	chr2	61445178	rs2694624	LCL	ATAC_chr2_61356346_61356854	0.00553149	297	61345187	61545122	5.69767	4.22771	10.354	4.4395	13.7956	14.7917	0.00764541	0.00762837	0.00799175	0.530558	0.000169411	4.5637e-07	0.00553149	0.994298
IBD_deLange_2017	chr2	61445178	rs2694624	LCL	ATAC_chr2_61443302_61444182	0.991912	297	61345187	61545122	5.69767	5.56748	10.354	10.3026	21.2886	20.647	0.00764733	0.00764757	0.528932	0.00819225	2.55709e-07	2.42895e-07	0.991912	0.00808758
IBD_deLange_2017	chr2	218181399	rs62183956	LCL	ATAC_chr2_218256043_218258187	0.00329473	243	218082398	218279775	6.24	4.18261	13.6182	3.75086	15.8751	17.3682	0.0076313	0.00761825	0.00782902	0.53193	0.000336181	1.73972e-08	0.00329473	0.996369
IBD_deLange_2017	chr2	233271044	rs3792111	LCL	ATAC_chr2_233247701_233248180	0.994031	457	233171907	233370649	11.2177	5.40684	55.8551	8.20012	64.9724	64.0488	0.00763551	0.00762889	0.530503	0.0080204	1.57018e-06	3.15704e-27	0.994031	0.00596748
IBD_deLange_2017	chr3	49921715	rs35275715	LCL	ATAC_chr3_49931052_49931264	6.79516e-06	238	49823245	50021177	7.70161	8.1398	22.9234	26.7298	42.0105	49.6532	0.00756962	0.00757645	0.00757544	0.534567	3.487e-14	1.57021e-12	6.79516e-06	0.999993
IBD_deLange_2017	chr5	10682118	rs7715399	LCL	ATAC_chr5_10698419_10701460	0.997009	598	10582465	10781518	5.06977	5.82087	6.17881	10.2531	18.0056	16.4183	0.00760334	0.00760055	0.532406	0.00779573	1.0403e-07	6.11585e-06	0.997009	0.0029851
IBD_deLange_2017	chr5	40414317	rs1445004	LCL	ATAC_chr5_40436332_40438172	0.998598	506	40314497	40513860	13.2992	7.42391	80.8938	22.0301	105.229	102.902	0.00758969	0.00759239	0.533617	0.00767752	3.83519e-13	1.04655e-38	0.998598	0.00140159
IBD_deLange_2017	chr5	40622847	rs4957326	LCL	ATAC_chr5_40578280_40579615	0.0105589	407	40522911	40722822	9.25185	11.9361	34.8642	62.1906	96.6538	97.0521	0.00767227	0.00768082	0.00837984	0.527255	1.41391e-29	1.04379e-17	0.0105589	0.989441
IBD_deLange_2017	chr5	130060738	rs10042508	LCL	ATAC_chr5_130044856_130046069	0.00930458	251	129962696	130160010	5.14839	4.90073	5.71084	7.7534	12.9464	13.4598	0.00766863	0.0076753	0.00828777	0.528021	6.20345e-06	4.78723e-05	0.00930458	0.99064
IBD_deLange_2017	chr5	132397705	rs11739135	LCL	ATAC_chr5_132354129_132355534	0.997544	494	132301616	132496995	10.928	4.91996	51.2914	6.32468	59.3788	57.6009	0.00760567	0.00759126	0.532883	0.00775	4.37651e-06	1.29268e-25	0.997544	0.00245169
IBD_deLange_2017	chr5	132397705	rs11739135	LCL	ATAC_chr5_132369126_132370665	0.00988428	494	132301616	132496995	10.928	5.17269	51.2914	6.70452	57.5361	57.9944	0.00767186	0.00766615	0.00833125	0.527707	1.76648e-05	7.63723e-25	0.00988428	0.990098
IBD_deLange_2017	chr5	132397705	rs11739135	LCL	ATAC_chr5_132429688_132432091	0.998993	494	132301616	132496995	10.928	8.34109	51.2914	26.7859	80.6914	78.037	0.00758756	0.00758878	0.533902	0.00765041	2.42073e-15	5.51292e-26	0.998993	0.00100689
IBD_deLange_2017	chr5	132617818	rs17772583	LCL	ATAC_chr5_132681949_132682380	0.00856988	246	132520324	132715000	5.49801	6.15849	7.90405	11.0148	18.3252	18.9133	0.00765272	0.00765464	0.00822729	0.528589	2.3752e-07	5.3306e-06	0.00856988	0.991425
IBD_deLange_2017	chr5	150943866	rs17800987	LCL	ATAC_chr5_150845690_150847801	0.991137	564	150843953	151043204	8.3018	5.27453	27.2414	7.13247	34.928	34.3699	0.00766437	0.00766192	0.528325	0.00824975	6.59855e-06	1.2193e-14	0.991137	0.00885683
IBD_deLange_2017	chr5	177371039	rs56235845	LCL	ATAC_chr5_177370560_177371068	0.999513	166	177272267	177469411	6.35507	10.3023	13.0966	44.646	60.7458	57.3711	0.00757948	0.00757626	0.534262	0.00761237	2.86998e-23	1.44349e-09	0.999513	0.000487453
IBD_deLange_2017	chr6	14731809	rs11417299	LCL	ATAC_chr6_14719002_14719497	0.99849	309	14632251	14831571	6.70857	4.76872	15.5484	5.61208	23.368	21.1107	0.00759106	0.00759193	0.533555	0.0076815	5.70761e-06	2.76195e-10	0.99849	0.0015041
IBD_deLange_2017	chr6	42039665	rs67289879	LCL	ATAC_chr6_42039068_42040406	0.999886	490	41942326	42139374	5.54321	4.92576	7.23535	4.40978	16.1169	11.2704	0.00757512	0.00757663	0.53452	0.00757684	1.96874e-06	1.1672e-07	0.999886	0.000111346
IBD_deLange_2017	chr6	90237621	rs36048311	LCL	ATAC_chr6_90251245_90252268	0.98679	257	90139244	90337263	6.39535	17.1191	13.7947	139.41	153.394	153.192	0.00769887	0.00770838	0.525296	0.00860365	3.41355e-63	1.22438e-08	0.98679	0.01321
IBD_deLange_2017	chr6	137638098	rs6933404	LCL	ATAC_chr6_137680803_137681284	0.999694	565	137538105	137733312	5.79195	6.03271	9.10018	10.5798	23.3817	19.5445	0.00758085	0.00757416	0.534413	0.00759362	8.89827e-09	3.90388e-08	0.999694	0.000306172
IBD_deLange_2017	chr6	167019278	rs35171809	LCL	ATAC_chr6_166988595_166990129	6.43484e-05	516	166919663	167119267	8.84553	10.6787	31.5685	47.0387	73.212	78.6072	0.00757569	0.00757528	0.00758029	0.534598	5.28097e-23	2.76273e-16	6.43484e-05	0.999936
IBD_deLange_2017	chr6	167019278	rs35171809	LCL	ATAC_chr6_166997442_167000122	0.00150304	516	166919663	167119267	8.84553	5.90055	31.5685	10.391	39.7011	41.9593	0.00758165	0.00758942	0.007685	0.533701	4.35666e-07	2.7691e-16	0.00150304	0.998497
IBD_deLange_2017	chr6	167019278	rs35171809	LCL	ATAC_chr6_167020312_167020739	0.988939	516	166919663	167119267	8.84553	12.7154	31.5685	73.8158	105.736	105.378	0.00767957	0.00767443	0.526921	0.00842691	8.87534e-35	1.97554e-16	0.988939	0.0110608
IBD_deLange_2017	chr6	167019278	rs35171809	LCL	ATAC_chr6_167098317_167099442	3.83589e-05	516	166919663	167119267	8.84553	7.54387	31.5685	22.2863	47.9422	53.8548	0.0075745	0.00757634	0.00758076	0.53457	2.9683e-12	2.7633e-16	3.83589e-05	0.999962
IBD_deLange_2017	chr7	2750246	rs798502	LCL	ATAC_chr7_2734198_2737162	0.99748	530	2650532	2849616	5.24818	5.42793	6.98373	7.59603	16.315	14.5629	0.00758989	0.00760395	0.532843	0.00775146	1.25902e-06	2.32678e-06	0.99748	0.00251638
IBD_deLange_2017	chr7	2750246	rs798502	LCL	ATAC_chr7_2772694_2773697	0.993004	530	2650532	2849616	5.24818	8.62984	6.98373	29.3394	37.091	36.315	0.00764306	0.00763778	0.529698	0.00810132	1.20442e-15	6.15752e-06	0.993004	0.00699013
IBD_deLange_2017	chr7	2750246	rs798502	LCL	ATAC_chr7_2799784_2800529	0.00523433	530	2650532	2849616	5.24818	5.66885	6.98373	10.1128	16.0467	17.0953	0.00762534	0.00762288	0.00797165	0.530913	5.8018e-07	1.32544e-05	0.00523433	0.994752
IBD_deLange_2017	chr7	2750246	rs798502	LCL	ATAC_chr7_2801133_2801673	0.996221	530	2650532	2849616	5.24818	6.561	6.98373	14.3917	22.7206	21.361	0.00761659	0.00761206	0.5319	0.00785115	2.08849e-09	3.44202e-06	0.996221	0.00377551
IBD_deLange_2017	chr7	2750246	rs798502	LCL	ATAC_chr7_2807645_2809319	0.00921108	530	2650532	2849616	5.24818	6.28214	6.98373	11.643	18.102	18.6241	0.00766561	0.00766368	0.00827698	0.528182	1.26581e-07	1.33588e-05	0.00921108	0.990775
IBD_deLange_2017	chr7	2750246	rs798502	LCL	ATAC_chr7_2820883_2822883	0.992178	530	2650532	2849616	5.24818	6.29239	6.98373	13.9165	21.5666	20.8932	0.00764414	0.00765103	0.529018	0.00817113	6.65538e-09	6.83021e-06	0.992178	0.00781544
IBD_deLange_2017	chr7	2750246	rs798502	LCL	ATAC_chr7_2823963_2825547	0.99266	530	2650532	2849616	5.24818	4.12151	6.98373	2.79565	10.5612	9.7731	0.00767367	0.00764084	0.529385	0.00810407	0.000402131	6.07637e-06	0.99266	0.00690998
IBD_deLange_2017	chr7	2750246	rs798502	LCL	ATAC_chr7_2838864_2839669	0.0153576	530	2650532	2849616	5.24818	12.0276	6.98373	62.3069	69.2136	69.2859	0.00772086	0.0077196	0.00878186	0.523775	1.27152e-29	1.35151e-05	0.0153576	0.984629
IBD_deLange_2017	chr7	74869879	rs2529269	LCL	ATAC_chr7_74916285_74916561	0.991561	25	74782019	74954591	6.39264	4.74352	14.3373	6.48605	21.3129	20.7093	0.00765213	0.00765148	0.52867	0.00821504	1.34107e-05	5.21978e-09	0.991561	0.00842564
IBD_deLange_2017	chr7	148738247	rs243505	LCL	ATAC_chr7_148726451_148726730	0.996556	303	148638325	148836292	6.28906	5.99162	13.7293	12.2862	27.4351	25.9864	0.00760274	0.00760504	0.532221	0.00783018	1.58864e-08	3.75341e-09	0.996556	0.00344367
IBD_deLange_2017	chr8	48506001	rs13263338	LCL	ATAC_chr8_48516835_48518892	0.986927	188	48406519	48603626	5.14685	5.08706	7.4877	6.48335	14.1689	13.9564	0.00770078	0.00770602	0.525303	0.00858875	1.8147e-05	6.65144e-06	0.986927	0.0130471
IBD_deLange_2017	chr8	125516832	rs4380956	LCL	ATAC_chr8_125527601_125528173	0.999477	351	125419147	125616597	7.14173	13.3203	17.6567	80.3144	101.097	97.7919	0.00758124	0.00758206	0.534181	0.00760944	8.20792e-39	1.33713e-11	0.999477	0.00052258
IBD_deLange_2017	chr8	128540294	rs938650	LCL	ATAC_chr8_128552794_128554303	0.986584	364	128440402	128639767	5.68254	4.47862	8.9031	4.04326	13.143	12.9403	0.00771887	0.00770633	0.525228	0.00860883	0.000208908	1.61678e-06	0.986584	0.0132036
IBD_deLange_2017	chr9	114785492	rs10114470	LCL	ATAC_chr9_114805662_114807160	0.999464	304	114685851	114885319	10.7669	6.05694	50.3971	10.7617	64.3425	61.0624	0.00758206	0.00758124	0.534181	0.00760944	1.24577e-08	7.62002e-26	0.999464	0.00053566
IBD_deLange_2017	chr9	136374746	rs3829110	LCL	ATAC_chr9_136372421_136374081	0.985855	331	136274844	136474610	12.592	5.15069	71.8436	6.80859	78.7912	78.6484	0.00770953	0.00770911	0.524627	0.00867441	1.39218e-05	7.93092e-34	0.985855	0.0141311
IBD_deLange_2017	chr10	31937527	rs12264039	LCL	ATAC_chr10_31878696_31879182	0.00561523	320	31837730	32037109	5.01389	7.68268	6.33209	23.4876	28.8357	29.8169	0.00762934	0.0076257	0.00799412	0.530679	9.03404e-13	2.5481e-05	0.00561523	0.994359
IBD_deLange_2017	chr10	62685804	rs10761659	LCL	ATAC_chr10_62687270_62687639	0.999761	376	62586742	62785630	12.5794	4.41937	69.6706	1.84692	75.5851	71.3277	0.00757815	0.00757408	0.534412	0.00758481	3.82803e-05	1.34053e-34	0.999761	0.000200921
IBD_deLange_2017	chr10	73899106	rs2675680	LCL	ATAC_chr10_73857320_73857796	0.993635	224	73799109	73998932	5.25806	15.1698	7.96094	107.173	115.967	115.103	0.00762879	0.00763108	0.530135	0.00805556	1.773e-49	2.16848e-06	0.993635	0.00636308
IBD_deLange_2017	chr10	79282718	rs1250573	LCL	ATAC_chr10_79240949_79252037	0.994158	396	79182863	79382609	7.10145	4.96297	17.5872	5.31582	23.8417	22.8936	0.00763333	0.00762916	0.530525	0.00800877	2.74894e-05	1.28682e-10	0.994158	0.00581482
IBD_deLange_2017	chr10	79282718	rs1250573	LCL	ATAC_chr10_79265503_79268691	0.993316	396	79182863	79382609	7.10145	4.3268	17.5872	2.44801	20.9199	20.0268	0.00767786	0.00763771	0.529926	0.00804054	0.000513765	1.3602e-10	0.993316	0.00617043
IBD_deLange_2017	chr10	80508189	rs2343551	LCL	ATAC_chr10_80492790_80494607	0.999079	493	80408398	80606856	6.66667	6.96543	14.1153	17.335	34.1314	31.3886	0.00757964	0.00758761	0.533914	0.00764066	2.87657e-11	7.20476e-10	0.999079	0.000920586
IBD_deLange_2017	chr10	99526738	rs6584282	LCL	ATAC_chr10_99532339_99533427	0.988602	509	99427559	99626710	12.2581	4.8581	67.8158	5.71969	73.8663	73.5322	0.00769273	0.00768398	0.526545	0.0084541	3.40364e-05	3.65991e-32	0.988602	0.0113641
IBD_deLange_2017	chr10	99526738	rs6584282	LCL	ATAC_chr10_99555509_99556783	0.000341705	509	99427559	99626710	12.2581	8.14593	67.8158	24.4102	88.4983	92.2259	0.00757988	0.0075757	0.00759414	0.534328	3.55238e-13	5.00592e-32	0.000341705	0.999658
IBD_deLange_2017	chr10	124750812	rs111456533	LCL	ATAC_chr10_124657720_124658552	0.987919	283	124650961	124850559	6.06471	6.46406	11.0187	14.9244	26.2135	25.9337	0.00769308	0.00769266	0.526148	0.00851143	3.63651e-09	1.80666e-07	0.987919	0.0120808
IBD_deLange_2017	chr12	9736291	rs10844640	LCL	ATAC_chr12_9711782_9718026	0.99667	657	9639106	9836128	5.11852	4.67222	5.74269	4.70652	11.9342	10.4394	0.00760594	0.00760459	0.532284	0.00782264	2.915e-05	1.03409e-05	0.99667	0.00328535
IBD_deLange_2017	chr14	87951173	rs3850378	LCL	ATAC_chr14_87998462_87999763	0.989383	632	87852273	88050993	7.42029	10.3319	19.5399	44.3755	64.3058	63.911	0.00767343	0.00768646	0.527104	0.00839433	5.21048e-22	3.18823e-11	0.989383	0.0106168
IBD_deLange_2017	chr16	10870261	rs6498114	LCL	ATAC_chr16_10866552_10872027	0.999633	369	10770493	10970169	5.41611	4.92593	7.54563	4.54405	15.6104	11.9407	0.00757323	0.00757956	0.534296	0.00759984	4.45492e-06	2.21631e-07	0.999633	0.000362331
IBD_deLange_2017	chr16	11601441	rs1544678	LCL	ATAC_chr16_11612113_11614249	0.997888	627	11501549	11701039	5.39394	10.9803	7.08557	52.2841	61.2703	59.345	0.0075921	0.00759604	0.533177	0.00773006	4.17287e-26	1.77881e-06	0.997888	0.00210973
IBD_deLange_2017	chr16	23844532	rs7190426	LCL	ATAC_chr16_23852819_23853933	0.991718	477	23744642	23943921	5.62581	8.70047	8.91702	30.0017	39.5306	38.9105	0.0076546	0.00765015	0.528712	0.00820717	7.27433e-16	1.04347e-06	0.991718	0.00828107
IBD_deLange_2017	chr16	28478021	rs28374519	LCL	ATAC_chr16_28426089_28426622	0.0106818	135	28462144	28577122	8.06569	5.9739	26.3061	13.1059	39.0145	39.4037	0.00768547	0.00768501	0.00839658	0.526963	2.95816e-08	5.47282e-14	0.0106818	0.989318
IBD_deLange_2017	chr16	28839050	rs62036658	LCL	ATAC_chr16_28749925_28750919	0.994644	149	28741505	28938730	7.68504	8.76644	24.4107	29.9226	55.3229	54.296	0.00762109	0.00762977	0.530768	0.00798097	5.36758e-16	1.33056e-13	0.994644	0.00535583
IBD_deLange_2017	chr16	28839050	rs62036658	LCL	ATAC_chr16_28753548_28755203	0.9925	149	28741505	28938730	7.68504	5.35891	24.4107	7.67006	32.7728	32.0606	0.00764853	0.00764806	0.529208	0.00814766	3.35024e-06	1.79749e-13	0.9925	0.00749623
IBD_deLange_2017	chr17	39887396	rs12936409	LCL	ATAC_chr17_39920149_39921796	0.997867	279	39793671	39987295	11.3387	6.77627	57.135	16.9336	75.9511	74.0365	0.00759638	0.00758911	0.533101	0.00773128	9.57585e-11	3.32291e-28	0.997867	0.0021331
IBD_deLange_2017	chr17	42362183	rs744166	LCL	ATAC_chr17_42363874_42364172	0.987478	344	42266197	42461423	8.80159	4.75526	30.8227	5.56808	36.6367	36.3854	0.00770018	0.0076992	0.52578	0.00854264	4.31744e-05	4.64771e-16	0.987478	0.0124789
IBD_deLange_2017	chr17	56786141	rs148211476	LCL	ATAC_chr17_56846045_56846377	0.994634	363	56686147	56884551	5.24194	5.26592	5.89548	9.33391	16.2437	15.216	0.00762109	0.00762977	0.530768	0.00798097	4.57705e-07	1.42683e-05	0.994634	0.0053515
IBD_deLange_2017	chr18	48878443	rs1319951	LCL	ATAC_chr18_48896442_48897742	0.999778	405	48778560	48978390	5.78912	4.35604	8.07387	2.38775	14.5053	10.2378	0.00757636	0.00757346	0.534422	0.00759185	2.28219e-05	7.73992e-08	0.999778	0.000199083
IBD_deLange_2017	chr19	33257277	rs62126610	LCL	ATAC_chr19_33260755_33261277	0.999099	513	33159089	33356029	8.4759	8.65658	27.9961	27.8901	58.5939	55.83	0.00758001	0.00758788	0.533919	0.00764028	7.29996e-16	6.57304e-16	0.999099	0.000901318
IBD_deLange_2017	chr19	46636823	rs12984626	LCL	ATAC_chr19_46616454_46617880	0.00635618	368	46537206	46736662	5.10884	19.5424	6.46224	181.409	187.003	187.868	0.00763843	0.00763921	0.00805714	0.529954	2.35691e-81	2.24382e-05	0.00635618	0.993621
IBD_deLange_2017	chr19	46636823	rs12984626	LCL	ATAC_chr19_46618682_46619179	0.997584	368	46537206	46736662	5.10884	4.29783	6.46224	1.99823	10.3677	8.43758	0.00761636	0.00760332	0.532878	0.00772861	0.000287033	3.29984e-06	0.997584	0.00209974
IBD_deLange_2017	chr20	32362668	rs6087887	LCL	ATAC_chr20_32445719_32446756	0.00222429	224	32263518	32462127	4.888	8.21219	6.12879	29.0222	33.2759	35.1491	0.00759803	0.00760273	0.00773262	0.532882	3.54574e-15	3.10787e-05	0.00222429	0.997745
IBD_deLange_2017	chr20	46006273	rs3761158	LCL	ATAC_chr20_46063685_46064180	0.996252	285	45908293	46106037	4.97638	5.22777	5.53016	6.90511	13.7802	12.4092	0.0076093	0.00760832	0.531895	0.00784292	3.7234e-06	1.47236e-05	0.996252	0.00372891
IBD_deLange_2017	chr22	30174454	rs1978083	LCL	ATAC_chr22_30078766_30079303	0.997243	255	30075690	30274102	6.20567	4.98831	12.9836	6.96979	21.579	19.9146	0.0075933	0.00758957	0.532785	0.00777388	2.62886e-06	6.42354e-09	0.997243	0.00275447
MS_Patsopoulos_2019	chr1	2589088	rs6670198	LCL	ATAC_chr1_2554629_2557863	0.994377	273	2489151	2687083	8.22036	5.35789	28.0612	8.68327	37.7147	36.7335	0.00762503	0.00763018	0.530648	0.00800331	9.17347e-07	3.52437e-15	0.994377	0.00562185
MS_Patsopoulos_2019	chr1	2589088	rs6670198	LCL	ATAC_chr1_2652189_2688564	0.0114176	273	2489151	2687083	8.22036	9.55262	28.0612	38.8262	66.5526	66.8829	0.00768324	0.00768937	0.00846151	0.526521	1.99114e-19	9.43249e-15	0.0114176	0.988582
MS_Patsopoulos_2019	chr1	91756532	rs12133753	LCL	ATAC_chr1_91751966_91752986	0.999488	588	91656691	91856417	5.61942	4.25352	8.75749	2.79116	14.8736	11.484	0.00758459	0.00758188	0.534148	0.00760497	3.13224e-05	8.0271e-08	0.999488	0.000479858
MS_Patsopoulos_2019	chr1	91756532	rs12133753	LCL	ATAC_chr1_91753525_91754982	0.999504	588	91656691	91856417	5.61942	7.55902	8.75749	21.3803	33.4157	30.0583	0.00757945	0.00757603	0.534252	0.00761286	2.77167e-13	8.40579e-08	0.999504	0.000495989
MS_Patsopoulos_2019	chr1	116547871	rs10801908	LCL	ATAC_chr1_116506152_116506738	0.999163	160	116450785	116645482	8.15344	11.5314	26.8306	58.8178	88.3675	85.5309	0.00758376	0.0075811	0.534068	0.00763516	2.67169e-29	2.08204e-15	0.999163	0.000837406
MS_Patsopoulos_2019	chr1	157716547	rs2317231	LCL	ATAC_chr1_157700559_157701057	0.995595	395	157616726	157815354	6.00595	6.94736	11.6706	16.3421	29.2084	27.9959	0.007622	0.00761812	0.531485	0.00790526	3.45224e-10	3.68723e-08	0.995595	0.00440497
MS_Patsopoulos_2019	chr1	160193656	rs3747621	LCL	ATAC_chr1_160226498_160227266	0.00902962	344	160094628	160293334	5.09765	4.31658	5.35016	4.11598	8.92236	9.46376	0.00767601	0.00766878	0.00827031	0.52799	0.000235449	6.84682e-05	0.00902962	0.990601
MS_Patsopoulos_2019	chr1	160420194	rs3737798	LCL	ATAC_chr1_160428709_160430464	0.997573	281	160321769	160520184	5.26526	4.71363	6.27758	4.73976	12.792	10.9922	0.00759398	0.0076009	0.532942	0.00775319	2.10643e-05	4.52976e-06	0.997573	0.00239923
MS_Patsopoulos_2019	chr1	160734175	rs983494	LCL	ATAC_chr1_160739859_160745504	0.997021	399	160634355	160834012	5.07478	4.68447	6.06667	3.9124	11.5747	9.96164	0.00760236	0.00759874	0.532485	0.00778959	5.77061e-05	6.69005e-06	0.997021	0.00290637
MS_Patsopoulos_2019	chr1	200906769	rs59655222	LCL	ATAC_chr1_200905415_200906301	0.010709	400	200806933	201005987	6.61332	4.60347	15.658	2.19958	17.4671	17.8559	0.00780023	0.00769418	0.00841158	0.525912	0.00162664	2.29306e-09	0.010709	0.987664
MS_Patsopoulos_2019	chr2	68419404	rs12622670	LCL	ATAC_chr2_68404217_68405656	0.995571	572	68321028	68519031	6.46055	8.68656	12.8623	29.3406	43.397	42.1904	0.00761484	0.00761891	0.531551	0.00790412	7.81894e-16	1.12151e-08	0.995571	0.00442948
MS_Patsopoulos_2019	chr2	68419404	rs12622670	LCL	ATAC_chr2_68417486_68419461	0.999451	572	68321028	68519031	6.46055	4.804	12.8623	3.46571	19.5499	16.2601	0.0075816	0.00758308	0.534167	0.00761781	1.76797e-05	1.46777e-09	0.999451	0.000531074
MS_Patsopoulos_2019	chr2	112013222	rs57116599	LCL	ATAC_chr2_111982717_111983168	0.993787	407	111913350	112113153	5.95556	10.4606	10.6101	48.8217	60.3045	59.4186	0.00763115	0.00764425	0.530343	0.00804163	3.74378e-24	1.47623e-07	0.993787	0.00621311
MS_Patsopoulos_2019	chr2	230257114	rs35540610	LCL	ATAC_chr2_230226987_230227880	0.99908	594	230157661	230356537	6.98352	4.7504	16.6156	4.92077	24.2554	21.5047	0.00758788	0.00758153	0.533913	0.00763957	6.82877e-06	5.68806e-11	0.99908	0.000913267
MS_Patsopoulos_2019	chr2	230257114	rs35540610	LCL	ATAC_chr2_230230198_230230525	0.99783	594	230157661	230356537	6.98352	4.48627	16.6156	3.08271	21.6246	19.6835	0.00760223	0.00758811	0.533178	0.00772316	9.50041e-05	1.25795e-10	0.99783	0.00207474
MS_Patsopoulos_2019	chr2	230257114	rs35540610	LCL	ATAC_chr2_230233864_230235315	0.996564	594	230157661	230356537	6.98352	6.92458	16.6156	14.6806	32.7376	31.2868	0.00760274	0.00760504	0.532221	0.00783018	1.41803e-09	2.04844e-10	0.996564	0.00343647
MS_Patsopoulos_2019	chr2	230257114	rs35540610	LCL	ATAC_chr2_230256760_230258456	0.998627	594	230157661	230356537	6.98352	4.99592	16.6156	5.3642	24.3114	21.9591	0.00758679	0.00758515	0.533736	0.00767403	6.45485e-06	8.38219e-11	0.998627	0.00136611
MS_Patsopoulos_2019	chr2	230257114	rs35540610	LCL	ATAC_chr2_230335496_230336179	0.998605	594	230157661	230356537	6.98352	4.46842	16.6156	4.30373	23.2433	20.8976	0.00758978	0.00758701	0.533688	0.00767749	1.87922e-05	8.44952e-11	0.998605	0.00137591
MS_Patsopoulos_2019	chr3	28030595	rs438613	LCL	ATAC_chr3_28036352_28037911	0.999394	426	27931312	28130261	8.31166	6.46793	27.5457	14.4374	45.0716	41.9136	0.00757966	0.00758214	0.534155	0.00762262	3.47004e-10	7.041e-16	0.999394	0.000606293
MS_Patsopoulos_2019	chr3	102030178	rs4325907	LCL	ATAC_chr3_102038068_102039307	0.994677	565	101930494	102129717	5.89789	9.58772	10.8052	38.6938	50.5216	49.4904	0.00762465	0.0076231	0.530953	0.00796874	8.05758e-20	1.04228e-07	0.994677	0.00532313
MS_Patsopoulos_2019	chr3	121792578	rs13075144	LCL	ATAC_chr3_121792916_121793574	0.994663	474	121692797	121892321	5.95116	5.6705	12.2113	11.2777	24.5082	23.4795	0.00762249	0.0076249	0.530965	0.00796924	6.51964e-08	2.56392e-08	0.994663	0.00533649
MS_Patsopoulos_2019	chr3	169818849	rs10936602	LCL	ATAC_chr3_169835452_169837124	0.994779	353	169720621	169918211	5.64241	6.92101	9.90508	17.6395	28.5807	27.5305	0.00762582	0.00762693	0.530951	0.00796353	1.10728e-10	2.53126e-07	0.994779	0.00522056
MS_Patsopoulos_2019	chr4	108137562	rs9992763	LCL	ATAC_chr4_108141022_108141715	0.995087	306	108037701	108237538	5.46947	5.79895	9.18902	9.91491	20.1949	19.0864	0.00761964	0.00762609	0.531155	0.00794336	2.37027e-07	4.90251e-07	0.995087	0.00491196
MS_Patsopoulos_2019	chr4	121198294	rs17051321	LCL	ATAC_chr4_121168475_121170323	0.984824	397	121098843	121298118	5.02813	12.3008	7.3452	68.1184	75.5401	75.4569	0.00771771	0.00772435	0.52387	0.00876816	3.50719e-32	8.686e-06	0.984824	0.0151671
MS_Patsopoulos_2019	chr4	121198294	rs17051321	LCL	ATAC_chr4_121171442_121172442	0.989478	397	121098843	121298118	5.02813	5.51198	7.3452	9.40893	17.1498	16.7463	0.0076779	0.00768117	0.527095	0.00838487	7.95558e-07	6.26791e-06	0.989478	0.0105144
MS_Patsopoulos_2019	chr5	40396323	rs11749040	LCL	ATAC_chr5_40436332_40438172	8.10015e-05	541	40296541	40496321	8.42721	7.42391	29.3583	21.9851	46.1788	51.3433	0.00757698	0.00757256	0.00757513	0.534496	4.01352e-12	2.5185e-15	8.10015e-05	0.999919
MS_Patsopoulos_2019	chr5	177363161	rs67111717	LCL	ATAC_chr5_177370560_177371068	0.00496896	181	177264278	177463066	5.02785	10.3023	7.12504	44.5594	50.5824	51.6798	0.00762571	0.00761956	0.00794686	0.531103	6.38334e-22	1.15412e-05	0.00496896	0.99502
MS_Patsopoulos_2019	chr6	7099796	rs12211604	LCL	ATAC_chr6_7124691_7125473	0.997191	393	6999883	7199299	5.2125	6.03913	6.44642	9.10551	17.171	15.5231	0.00759224	0.00760944	0.532651	0.00778293	3.12664e-07	4.47599e-06	0.997191	0.00280429
MS_Patsopoulos_2019	chr6	90267049	rs72928038	LCL	ATAC_chr6_90251245_90252268	0.991323	308	90167125	90367046	6.48271	17.1191	13.6526	139.229	153.445	152.868	0.00765472	0.00765542	0.52857	0.00824081	2.79162e-63	9.61952e-09	0.991323	0.00867656
MS_Patsopoulos_2019	chr6	135512325	rs4896153	LCL	ATAC_chr6_135496959_135499750	0.998477	161	135412685	135612254	7.37479	6.22538	21.0719	11.8019	35.0448	32.7994	0.00758764	0.00758981	0.533593	0.00768841	1.21302e-08	1.14306e-12	0.998477	0.00152333
MS_Patsopoulos_2019	chr6	137839647	rs55771473	LCL	ATAC_chr6_137919441_137923021	0.995341	249	137742188	137939507	5.45902	4.33017	8.08399	2.57435	11.87	10.6403	0.00764384	0.00761729	0.53129	0.00789929	0.000324862	1.31033e-06	0.995341	0.00432697
MS_Patsopoulos_2019	chr7	37342861	rs60600003	LCL	ATAC_chr7_37340793_37343675	0.998407	582	37247259	37442822	5.0597	4.96754	5.68718	6.08283	13.958	11.7504	0.007592	0.00759168	0.533356	0.00769105	3.63632e-06	5.40098e-06	0.998407	0.00158315
MS_Patsopoulos_2019	chr8	70529879	rs7830997	LCL	ATAC_chr8_70523265_70524829	0.994503	273	70430485	70629401	4.89421	9.47725	6.40871	38.5691	45.9571	44.9541	0.00762618	0.00762415	0.530809	0.00798719	9.53549e-20	8.83673e-06	0.994503	0.00548855
MS_Patsopoulos_2019	chr8	78723008	rs1483572	LCL	ATAC_chr8_78664698_78667310	0.994664	382	78623016	78823008	5.74826	16.5716	11.3848	130.582	142.98	141.951	0.0076249	0.00762249	0.530965	0.00796924	1.00865e-59	5.89392e-08	0.994664	0.00533552
MS_Patsopoulos_2019	chr8	78723008	rs1483572	LCL	ATAC_chr8_78671653_78672030	0.995156	382	78623016	78823008	5.74826	6.42345	11.3848	14.0195	26.5108	25.3889	0.00762299	0.00762017	0.531227	0.00794041	3.85116e-09	5.36627e-08	0.995156	0.0048441
MS_Patsopoulos_2019	chr8	78723008	rs1483572	LCL	ATAC_chr8_78694876_78695354	0.996272	382	78623016	78823008	5.74826	4.20089	11.3848	4.29293	17.0484	15.6629	0.0076072	0.00760698	0.532063	0.00785314	4.94251e-05	4.11139e-08	0.996272	0.003679
MS_Patsopoulos_2019	chr8	78723008	rs1483572	LCL	ATAC_chr8_78723305_78724318	0.993674	382	78623016	78823008	5.74826	22.7312	11.3848	250.366	262.606	261.735	0.00763559	0.0076353	0.530068	0.00805684	1.1271e-111	6.91788e-08	0.993674	0.00632548
MS_Patsopoulos_2019	chr8	78723008	rs1483572	LCL	ATAC_chr8_78724716_78725634	0.993659	382	78623016	78823008	5.74826	15.885	11.3848	118.436	130.673	129.806	0.00764225	0.00763918	0.53015	0.00804861	2.23824e-54	6.94556e-08	0.993659	0.00634109
MS_Patsopoulos_2019	chr8	78723008	rs1483572	LCL	ATAC_chr8_78726080_78727613	0.995677	382	78623016	78823008	5.74826	9.08012	11.3848	35.3298	47.929	46.6992	0.00761369	0.00761295	0.531628	0.0078955	1.91937e-18	4.81192e-08	0.995677	0.00432339
MS_Patsopoulos_2019	chr8	78723008	rs1483572	LCL	ATAC_chr8_78731965_78732714	0.995174	382	78623016	78823008	5.74826	8.25062	11.3848	27.8393	40.3342	39.2088	0.00761771	0.00762323	0.531171	0.00793645	3.81875e-15	5.34973e-08	0.995174	0.00482581
MS_Patsopoulos_2019	chr8	128165523	rs7819665	LCL	ATAC_chr8_128173490_128174802	0.997325	521	128066086	128264460	5.34997	4.95354	8.88511	6.95698	17.518	15.8244	0.007603	0.00759064	0.532702	0.00776216	2.53595e-06	3.68178e-07	0.997325	0.0026721
MS_Patsopoulos_2019	chr8	128165523	rs7819665	LCL	ATAC_chr8_128175377_128176156	0.99657	521	128066086	128264460	5.34997	5.55721	8.88511	9.41335	19.734	18.2809	0.00760925	0.00761191	0.532143	0.00782997	2.76837e-07	4.69664e-07	0.99657	0.00342913
MS_Patsopoulos_2019	chr8	128165523	rs7819665	LCL	ATAC_chr8_128184297_128186404	0.996359	521	128066086	128264460	5.34997	11.1449	8.88511	55.2241	65.4862	64.0917	0.00760924	0.00761267	0.532067	0.00784118	3.73479e-27	4.98006e-07	0.996359	0.00364098
MS_Patsopoulos_2019	chr9	98105907	rs7855251	LCL	ATAC_chr9_98103819_98105371	0.998635	426	98006009	98205576	5.48084	15.4851	7.40769	110.831	120.535	118.18	0.00758519	0.00758669	0.533605	0.00768169	1.05073e-51	8.66461e-07	0.998635	0.00136367
MS_Patsopoulos_2019	chr10	79299578	rs1250551	LCL	ATAC_chr10_79240949_79252037	0.993024	372	79199760	79399282	6.66417	4.96297	15.4654	5.40333	21.6429	20.8611	0.00764689	0.00763724	0.529735	0.00809789	2.9752e-05	1.26785e-09	0.993024	0.00694605
MS_Patsopoulos_2019	chr10	79299578	rs1250551	LCL	ATAC_chr10_79265503_79268691	0.989709	372	79199760	79399282	6.66417	4.3268	15.4654	2.55008	18.4968	18.0103	0.00772167	0.00767175	0.52742	0.00831499	0.000699117	1.70876e-09	0.989709	0.00959233
MS_Patsopoulos_2019	chr11	47338861	rs2269434	LCL	ATAC_chr11_47271853_47273171	0.997109	378	47239709	47438755	5.01746	4.7722	6.38271	5.39517	13.3809	11.7564	0.00760034	0.00759537	0.532617	0.00778626	1.29987e-05	4.83877e-06	0.997109	0.0028717
MS_Patsopoulos_2019	chr11	65937961	rs531612	LCL	ATAC_chr11_66001607_66003382	0.995868	268	65839924	66037917	5.33782	6.91248	9.11216	18.4757	28.8394	27.5662	0.00761032	0.00761211	0.531769	0.00788074	3.85862e-11	4.49842e-07	0.995868	0.00413128
MS_Patsopoulos_2019	chr11	118872577	rs12365699	LCL	ATAC_chr11_118870007_118871173	0.995885	377	118773504	118971051	6.2914	5.44256	12.5091	8.29665	22.0708	20.7938	0.00761256	0.00761044	0.531781	0.00787768	1.00325e-06	1.4854e-08	0.995885	0.00411415
MS_Patsopoulos_2019	chr12	123119506	rs7975763	LCL	ATAC_chr12_123106648_123107467	0.00705752	180	123032370	123219034	5.77262	4.41373	11.5507	5.45083	16.2304	16.998	0.00764945	0.00763918	0.00811062	0.529574	6.17826e-05	1.38396e-07	0.00705752	0.992881
MS_Patsopoulos_2019	chr12	123431550	rs35416759	LCL	ATAC_chr12_123432166_123434352	0.984243	269	123333016	123529704	5.21093	5.9342	8.25167	10.2249	18.5226	18.4714	0.00772278	0.00772908	0.523537	0.00881997	5.02706e-07	3.61945e-06	0.984243	0.015753
MS_Patsopoulos_2019	chr14	102799507	rs12147246	LCL	ATAC_chr14_102773031_102773586	0.997498	271	102701751	102898400	5.87246	6.46838	11.8489	12.2742	25.8429	24.0842	0.00758675	0.00760763	0.532859	0.00775822	1.18806e-08	1.8228e-08	0.997498	0.00250191
MS_Patsopoulos_2019	chr14	102799507	rs12147246	LCL	ATAC_chr14_102779659_102780227	0.99616	271	102701751	102898400	5.87246	4.12449	11.8489	3.35897	16.5626	15.186	0.00761702	0.00760902	0.531884	0.00785156	0.000127988	2.62779e-08	0.99616	0.00371213
MS_Patsopoulos_2019	chr14	102799507	rs12147246	LCL	ATAC_chr14_102784420_102786187	0.996489	271	102701751	102898400	5.87246	10.3073	11.8489	45.558	58.8088	57.3785	0.00761201	0.00761118	0.532172	0.0078378	5.74744e-23	2.50682e-08	0.996489	0.00351107
MS_Patsopoulos_2019	chr14	102799507	rs12147246	LCL	ATAC_chr14_102798252_102800541	0.997092	271	102701751	102898400	5.87246	4.46748	11.8489	4.374	17.8237	16.1993	0.00761095	0.00760026	0.532501	0.00778424	3.62258e-05	2.05166e-08	0.997092	0.00287183
MS_Patsopoulos_2019	chr14	102799507	rs12147246	LCL	ATAC_chr14_102805192_102808544	0.997021	271	102701751	102898400	5.87246	4.80516	11.8489	6.08281	19.5007	17.9091	0.00759956	0.00760188	0.532415	0.00779465	6.76224e-06	2.1186e-08	0.997021	0.00297177
MS_Patsopoulos_2019	chr14	102799507	rs12147246	LCL	ATAC_chr14_102813105_102813645	0.995607	271	102701751	102898400	5.87246	6.6255	11.8489	14.7565	27.8019	26.5864	0.00762045	0.00761984	0.531497	0.00790749	1.68373e-09	3.08324e-08	0.995607	0.00439287
MS_Patsopoulos_2019	chr14	103445858	rs11622356	LCL	ATAC_chr14_103427556_103428058	0.995982	418	103345983	103545857	4.99563	6.28426	7.30737	14.2513	22.8452	21.5441	0.00761374	0.00761758	0.531802	0.00787534	2.54758e-09	2.64283e-06	0.995982	0.00401532
MS_Patsopoulos_2019	chr16	1017832	rs405343	LCL	ATAC_chr16_1025244_1025709	0.998825	801	918292	1117815	5.46172	10.5641	7.94491	46.2415	56.656	54.1541	0.00758773	0.00758237	0.533771	0.00766248	9.93785e-24	4.256e-07	0.998825	0.0011747
MS_Patsopoulos_2019	chr16	11120094	rs6498163	LCL	ATAC_chr16_11077545_11080279	0.000900634	517	11020149	11219907	10.1168	7.07063	44.3419	18.0786	59.6556	62.4203	0.00758788	0.00758001	0.00764028	0.533919	1.99926e-10	7.84207e-22	0.000900634	0.999099
MS_Patsopoulos_2019	chr16	11120094	rs6498163	LCL	ATAC_chr16_11080500_11081190	0.0033913	517	11020149	11219907	10.1168	5.52481	44.3419	8.17277	51.049	52.5141	0.00760129	0.00761211	0.00783956	0.532313	4.01871e-06	7.88254e-22	0.0033913	0.996605
MS_Patsopoulos_2019	chr16	11336257	rs28693671	LCL	ATAC_chr16_11307865_11309419	0.988464	895	11236922	11436139	6.88289	4.84354	15.3126	5.07722	20.7135	20.388	0.00768479	0.00768124	0.526502	0.0084605	6.5106e-05	2.33486e-09	0.988464	0.0114707
MS_Patsopoulos_2019	chr16	11336257	rs28693671	LCL	ATAC_chr16_11309734_11311587	0.0035193	895	11236922	11436139	6.88289	8.37027	15.3126	26.2752	40.1599	41.5874	0.00761327	0.00760886	0.00783259	0.532051	5.53457e-14	3.19033e-09	0.0035193	0.996481
MS_Patsopoulos_2019	chr16	85987899	rs35703946	LCL	ATAC_chr16_85983281_85986388	0.997596	757	85888003	86086924	6.00292	5.32367	8.83072	5.59517	16.2149	14.4128	0.00760217	0.00760031	0.532914	0.00775536	8.83754e-06	3.47572e-07	0.997596	0.00239486
MS_Patsopoulos_2019	chr17	36486677	rs4796224	LCL	ATAC_chr17_36543840_36546642	0.995056	121	36422736	36586440	5.23803	4.70526	8.39699	6.19609	15.6706	14.5667	0.00762135	0.00762329	0.531146	0.00794046	9.90273e-06	1.09655e-06	0.995056	0.00493238
MS_Patsopoulos_2019	chr17	42377817	rs1026916	LCL	ATAC_chr17_42363874_42364172	0.000814782	359	42279516	42472638	7.43828	4.75526	21.6923	5.62469	24.4529	27.3168	0.00758476	0.0075853	0.00763396	0.534012	5.12073e-05	5.38623e-12	0.000814782	0.999134
MS_Patsopoulos_2019	chr17	59781849	rs2150879	LCL	ATAC_chr17_59848584_59849531	0.996575	247	59684801	59881707	6.2845	5.08958	14.0616	7.12153	22.6133	21.1581	0.00761191	0.00760925	0.532143	0.00782997	2.75434e-06	2.66592e-09	0.996575	0.00342195
MS_Patsopoulos_2019	chr19	18191169	rs4808760	LCL	ATAC_chr19_18107778_18108423	0.985566	523	18091302	18291069	7.22967	5.21339	19.0632	7.02702	26.2136	26.0874	0.00771754	0.00770955	0.524502	0.00870739	1.13778e-05	6.73521e-11	0.985566	0.0144222
MS_Patsopoulos_2019	chr19	18191169	rs4808760	LCL	ATAC_chr19_18223857_18225218	0.991705	523	18091302	18291069	7.22967	5.22261	19.0632	5.73811	25.4185	24.7971	0.00765071	0.00765412	0.528708	0.00820776	2.49339e-05	4.07344e-11	0.991705	0.00826978
MS_Patsopoulos_2019	chr19	49333989	rs1465697	LCL	ATAC_chr19_49388004_49388562	0.996856	420	49234115	49432279	6.62473	4.53862	14.7675	4.30616	20.6051	19.055	0.0076077	0.00759869	0.532441	0.00780689	4.15322e-05	1.18726e-09	0.996856	0.00310203
MS_Patsopoulos_2019	chr19	49333989	rs1465697	LCL	ATAC_chr19_49390758_49391301	0.997617	420	49234115	49432279	6.62473	7.00513	14.7675	16.903	33.4487	31.6421	0.00760022	0.00759469	0.532918	0.00775253	1.09646e-10	9.27006e-10	0.997617	0.00238313
MS_Patsopoulos_2019	chr19	49333989	rs1465697	LCL	ATAC_chr19_49391700_49392465	0.998228	420	49234115	49432279	6.62473	4.53313	14.7675	4.3155	21.1668	19.0564	0.00759871	0.00759402	0.533292	0.00770642	2.36519e-05	6.82857e-10	0.998228	0.00174825
MS_Patsopoulos_2019	chr19	49333989	rs1465697	LCL	ATAC_chr19_49403400_49403902	0.996159	420	49234115	49432279	6.62473	6.496	14.7675	12.2678	28.364	27.0192	0.00761194	0.0076173	0.531769	0.00786931	1.77511e-08	1.45843e-09	0.996159	0.00384148
MS_Patsopoulos_2019	chr20	46105671	rs6032662	LCL	ATAC_chr20_46063685_46064180	0.998606	345	46005911	46205582	7.30152	5.22777	20.0853	6.72129	29.1004	26.7663	0.00758969	0.00759239	0.533617	0.00767752	1.7266e-06	2.71283e-12	0.998606	0.00139218
MS_Patsopoulos_2019	chr20	46105671	rs6032662	LCL	ATAC_chr20_46120357_46121013	0.996937	345	46005911	46205582	7.30152	4.23119	20.0853	1.47557	23.3044	21.5398	0.0076408	0.00760603	0.532459	0.00776714	0.000572144	4.71431e-12	0.996937	0.00249063
MS_Patsopoulos_2019	chr20	48636949	rs3935549	LCL	ATAC_chr20_48635764_48636288	0.00259403	581	48538169	48736641	5.53162	5.58564	7.72022	8.59938	14.5956	16.319	0.00759626	0.0075958	0.00776587	0.532843	2.62098e-06	6.31326e-06	0.00259403	0.997397
MS_Patsopoulos_2019	chr22	21851064	rs9610458	LCL	ATAC_chr22_21754627_21755210	0.0016088	280	21752246	21950844	6.91821	6.29233	17.2611	12.1798	27.2489	29.4402	0.00758597	0.00758382	0.00769316	0.533609	7.29084e-08	4.52751e-10	0.0016088	0.998391
MS_Patsopoulos_2019	chr22	21851064	rs9610458	LCL	ATAC_chr22_21755912_21756531	0.992595	280	21752246	21950844	6.91821	6.34599	17.2611	14.199	32.171	31.4488	0.00764737	0.00764644	0.529479	0.00813226	4.79917e-09	2.24508e-10	0.992595	0.00740452
PBC_Cordell_2021	chr1	2592284	rs867436	LCL	ATAC_chr1_2554629_2557863	0.989142	85	2572795	2624201	5.87762	5.35789	13.2164	9.69059	23.261	22.8864	0.00768448	0.00767677	0.527027	0.00841354	6.26232e-07	1.84104e-08	0.989142	0.0108572
PBC_Cordell_2021	chr1	2592284	rs867436	LCL	ATAC_chr1_2652189_2688564	0.00196	85	2572795	2624201	5.87762	9.55262	13.2164	39.098	50.3153	52.3113	0.00759236	0.00759187	0.00770998	0.533469	1.49187e-19	2.59384e-08	0.00196	0.99804
PBC_Cordell_2021	chr1	67354511	rs6679356	LCL	ATAC_chr1_67334857_67337572	0.999484	192	67255184	67446576	16.8058	4.17341	132.169	2.00363	137.521	134.064	0.00758416	0.00758395	0.534172	0.00761324	6.71948e-05	1.98304e-61	0.999484	0.000449016
PBC_Cordell_2021	chr1	116522461	rs10802191	LCL	ATAC_chr1_116506152_116506738	0.985915	56	116473748	116619588	5.5526	11.5314	11.5258	59.3569	71.0008	70.8553	0.00770734	0.0077145	0.524755	0.00867047	2.14367e-28	1.27154e-07	0.985915	0.0140846
PBC_Cordell_2021	chr1	157700500	rs945635	LCL	ATAC_chr1_157700559_157701057	0.998889	193	157606366	157788521	5.65128	6.94736	10.0264	17.0285	29.5035	26.9461	0.00758335	0.00758738	0.533849	0.00766077	4.93341e-11	5.4241e-08	0.998889	0.00111095
PBC_Cordell_2021	chr1	201049931	rs55734382	LCL	ATAC_chr1_201050399_201051199	0.997411	289	200951234	201148818	5.99273	5.12379	10.8389	6.72812	19.2651	17.5394	0.0075929	0.00759223	0.532863	0.00775998	3.11306e-06	5.10347e-08	0.997411	0.00258595
PBC_Cordell_2021	chr2	134583630	rs859767	LCL	ATAC_chr2_134581408_134584181	0.996899	218	134483701	134682182	6.03978	5.55778	11.9038	9.82101	23.2444	21.6943	0.00759847	0.00759729	0.532491	0.007805	1.69004e-07	2.10521e-08	0.996899	0.00310099
PBC_Cordell_2021	chr2	134583630	rs859767	LCL	ATAC_chr2_134668844_134669457	0.993283	218	134483701	134682182	6.03978	7.87524	11.9038	25.272	37.9722	37.1578	0.00763971	0.00762667	0.529819	0.00808927	6.83392e-14	4.36207e-08	0.993283	0.00671731
PBC_Cordell_2021	chr2	134583630	rs859767	LCL	ATAC_chr2_134670314_134671245	0.996561	218	134483701	134682182	6.03978	5.27828	11.9038	8.73629	22.0618	20.6115	0.00760274	0.00760504	0.532221	0.00783018	5.51825e-07	2.32439e-08	0.996561	0.00343817
PBC_Cordell_2021	chr2	190391157	rs11892526	LCL	ATAC_chr2_190407128_190410359	0.000596071	340	190293050	190490562	8.70164	8.956	30.0627	34.3106	61.1983	64.3732	0.00757915	0.00757935	0.00762243	0.534173	1.7817e-17	1.24642e-15	0.000596071	0.999404
PBC_Cordell_2021	chr3	160012361	rs485789	LCL	ATAC_chr3_160005886_160007265	0.998138	331	159912550	160103814	15.7353	4.34271	116.436	5.10598	123.58	121.526	0.0075891	0.00758798	0.533352	0.0077135	1.12161e-05	5.00788e-54	0.998138	0.00185049
PBC_Cordell_2021	chr4	947050	rs6848199	LCL	ATAC_chr4_946730_947328	0.997443	283	847421	1046018	5.30943	4.99524	7.51989	4.74186	13.976	12.2291	0.00759817	0.00759005	0.532874	0.00776095	2.2343e-05	1.38737e-06	0.997443	0.0025324
PBC_Cordell_2021	chr4	105207797	rs7663401	LCL	ATAC_chr4_105271237_105271604	0.989893	220	105108907	105306975	5.55593	5.98681	9.34619	12.0847	21.8582	21.4191	0.0076744	0.00766981	0.527511	0.00835425	5.30287e-08	8.19563e-07	0.989893	0.0101063
PBC_Cordell_2021	chr5	100866578	rs141002831	LCL	ATAC_chr5_100817339_100818933	0.983989	224	100766944	100958058	5.25626	5.2538	8.36605	9.11093	17.508	17.4702	0.00772813	0.00773307	0.523346	0.0088407	1.55595e-06	3.27922e-06	0.983989	0.0160057
PBC_Cordell_2021	chr5	100866578	rs141002831	LCL	ATAC_chr5_100837020_100838527	0.0086427	224	100766944	100958058	5.25626	4.55012	8.36605	6.41431	14.1958	14.777	0.0076593	0.00765447	0.00823895	0.528479	2.36126e-05	3.35149e-06	0.0086427	0.99133
PBC_Cordell_2021	chr5	142130032	rs10062349	LCL	ATAC_chr5_142108213_142110501	0.990104	408	142057091	142229458	5.3821	5.92449	9.38885	10.4862	20.3269	19.8697	0.00766788	0.00766908	0.527692	0.00833065	2.55644e-07	7.66116e-07	0.990104	0.00989503
PBC_Cordell_2021	chr6	106115737	rs58926232	LCL	ATAC_chr6_106114225_106115686	0.999668	178	106018662	106215538	4.9684	5.19962	5.73525	5.99378	15.2301	11.4647	0.00757931	0.00757941	0.53434	0.0076039	1.06688e-06	1.38165e-06	0.999668	0.000329449
PBC_Cordell_2021	chr6	137651931	rs2327832	LCL	ATAC_chr6_137680803_137681284	0.99961	358	137552084	137744408	6.33945	6.03271	13.0754	11.1004	27.6593	24.063	0.00757636	0.00757758	0.534325	0.00760788	6.57323e-09	9.12253e-10	0.99961	0.000390324
PBC_Cordell_2021	chr7	20339178	rs7805218	LCL	ATAC_chr7_20333637_20334268	0.99721	258	20248322	20435721	5.48574	5.20087	9.48201	7.86189	18.9691	17.3161	0.00760601	0.00759641	0.532635	0.00777936	1.07975e-06	2.13385e-07	0.99721	0.00278869
PBC_Cordell_2021	chr7	37342861	rs60600003	LCL	ATAC_chr7_37340793_37343675	0.998993	402	37247259	37433521	7.23363	4.96754	18.7453	6.48782	27.8618	25.2059	0.00758756	0.00758878	0.533902	0.00765041	1.55947e-06	7.40756e-12	0.998993	0.00100543
PBC_Cordell_2021	chr7	139044797	rs67134107	LCL	ATAC_chr7_139043707_139044791	0.996519	299	138945285	139144699	5.62183	4.77211	8.95915	5.37043	15.7538	14.3103	0.00761047	0.0076149	0.532072	0.00783431	1.5961e-05	4.41321e-07	0.996519	0.00346448
PBC_Cordell_2021	chr7	139044797	rs67134107	LCL	ATAC_chr7_139045242_139045737	0.996025	299	138945285	139144699	5.62183	9.39356	8.95915	37.6108	47.8561	46.545	0.00761029	0.00761447	0.531867	0.00787388	1.82452e-19	5.06571e-07	0.996025	0.00397437
PBC_Cordell_2021	chr9	133941696	rs2428004	LCL	ATAC_chr9_133953610_133955410	0.991204	146	133856305	134009036	5.02355	4.73516	7.43079	5.23483	13.2198	12.6499	0.00765871	0.00766104	0.528469	0.00824443	4.397e-05	4.89322e-06	0.991204	0.00874524
PBC_Cordell_2021	chr9	133941696	rs2428004	LCL	ATAC_chr9_133955800_133959906	0.997673	146	133856305	134009036	5.02355	5.66398	7.43079	9.14078	18.3476	16.5173	0.00760285	0.00759997	0.532977	0.00774617	2.58323e-07	1.4277e-06	0.997673	0.0023254
PBC_Cordell_2021	chr11	646986	rs58523027	LCL	ATAC_chr11_642716_642843	0.993727	197	547501	744185	5.49104	4.45654	8.99711	3.36835	13.2543	12.346	0.00764649	0.00763593	0.530219	0.00802935	0.000202954	7.28214e-07	0.993727	0.0060675
PBC_Cordell_2021	chr11	47375103	rs4752829	LCL	ATAC_chr11_47425772_47427500	0.997187	354	47276650	47474194	4.8952	7.49764	5.4847	21.8893	29.0001	27.3531	0.00759285	0.00760471	0.532765	0.00776913	8.71003e-13	1.16184e-05	0.997187	0.002801
PBC_Cordell_2021	chr11	111368640	rs12419634	LCL	ATAC_chr11_111388716_111389453	0.997177	310	111268939	111465591	5.76272	4.40148	9.44343	4.36283	15.4358	13.7829	0.00760098	0.00759728	0.532649	0.00777378	3.55433e-05	2.20836e-07	0.997177	0.00278694
PBC_Cordell_2021	chr13	42480866	rs9533122	LCL	ATAC_chr13_42478532_42479101	0.997548	188	42391701	42580823	7.20439	6.68756	20.1775	16.4174	38.3342	36.5562	0.00760567	0.00759126	0.532883	0.00775	1.85391e-10	4.30801e-12	0.997548	0.00245152
PBC_Cordell_2021	chr14	68283210	rs3784099	LCL	ATAC_chr14_68308938_68309433	0.00623934	179	68183297	68381926	8.33067	5.73154	28.0953	11.041	38.2509	39.1339	0.00764512	0.0076363	0.00805076	0.530247	2.30234e-07	9.01692e-15	0.00623934	0.99376
PBC_Cordell_2021	chr14	68283210	rs3784099	LCL	ATAC_chr14_68340196_68340659	0.999366	179	68183297	68381926	8.33067	4.19733	28.0953	3.29299	34.4299	31.2762	0.00757996	0.0075821	0.534152	0.00762257	2.51571e-05	4.25868e-16	0.999366	0.000608865
PBC_Cordell_2021	chr15	78939988	rs11856301	LCL	ATAC_chr15_78938442_78940267	0.995145	223	78839988	79035840	5.14471	6.3315	7.64808	13.5318	22.2812	21.1608	0.00762391	0.00762215	0.531215	0.00794137	6.30567e-09	2.26419e-06	0.995145	0.00485252
PBC_Cordell_2021	chr16	11080508	rs9652601	LCL	ATAC_chr16_11077545_11080279	0.999073	334	10980884	11174574	10.0855	7.07063	42.8844	18.6087	64.1932	61.4577	0.00758761	0.00757964	0.533914	0.00764066	7.90535e-12	2.2629e-22	0.999073	0.000927324
PBC_Cordell_2021	chr16	11080508	rs9652601	LCL	ATAC_chr16_11080500_11081190	0.998524	334	10980884	11174574	10.0855	5.52481	42.8844	8.59356	53.7293	51.4529	0.00758903	0.00758358	0.5336	0.00768237	2.76975e-07	3.54657e-22	0.998524	0.00147574
PBC_Cordell_2021	chr16	68275946	rs55651156	LCL	ATAC_chr16_68368372_68369181	0.990519	179	68263155	68375632	5.4669	9.60042	8.60607	39.8576	48.9458	48.4494	0.00766619	0.00766096	0.527937	0.00829987	4.35048e-20	1.62404e-06	0.990519	0.0094791
PBC_Cordell_2021	chr16	85985665	rs11117432	LCL	ATAC_chr16_85983281_85986388	0.999908	241	85888003	86078350	10.1715	5.13664	43.4453	6.01009	54.0901	49.0519	0.00757892	0.00757378	0.534513	0.00758573	3.37784e-07	1.86387e-23	0.999908	9.20326e-05
PBC_Cordell_2021	chr17	39895095	rs8067378	LCL	ATAC_chr17_39915643_39915912	0.995667	272	39803764	39994761	12.0615	6.6813	65.6047	16.4348	83.258	82.0304	0.00761295	0.00761369	0.531628	0.0078955	3.07125e-10	1.35889e-31	0.995667	0.00433265
PBC_Cordell_2021	chr17	39895095	rs8067378	LCL	ATAC_chr17_39916567_39916765	0.996301	272	39803764	39994761	12.0615	4.21758	65.6047	4.34685	71.3319	69.9404	0.00761675	0.00761092	0.532046	0.00784266	4.6442e-05	1.15518e-31	0.996301	0.0036527
PBC_Cordell_2021	chr17	39895095	rs8067378	LCL	ATAC_chr17_39920149_39921796	0.99354	272	39803764	39994761	12.0615	6.77627	65.6047	15.9287	82.3768	81.5269	0.00764052	0.00763413	0.530019	0.0080625	7.44661e-10	1.98437e-31	0.99354	0.00646003
PBC_Cordell_2021	chr17	39895095	rs8067378	LCL	ATAC_chr17_39938036_39938472	0.998783	272	39803764	39994761	12.0615	4.83096	65.6047	6.14376	74.185	71.7161	0.00758369	0.00758604	0.533689	0.00766417	2.66473e-06	4.00176e-32	0.998783	0.00121451
PBC_Cordell_2021	chr17	39895095	rs8067378	LCL	ATAC_chr17_39939480_39940401	0.997422	272	39803764	39994761	12.0615	6.65806	65.6047	15.7994	83.118	81.389	0.00760495	0.00758887	0.532838	0.00776126	3.52717e-10	8.24833e-32	0.997422	0.00257823
PBC_Cordell_2021	chr17	45716462	rs4479288	LCL	ATAC_chr17_45620000_45620922	0.983396	750	45619471	45816385	6.41159	16.5331	16.4681	126.423	142.896	142.889	0.00773549	0.00773413	0.522867	0.00889045	1.80206e-57	1.01989e-09	0.983396	0.0166039
PBC_Cordell_2021	chr17	45716462	rs4479288	LCL	ATAC_chr17_45740609_45740840	0.984532	750	45619471	45816385	6.41159	5.07759	16.4681	7.1452	23.6784	23.6117	0.00772597	0.00772053	0.5237	0.00878907	1.07329e-05	9.58312e-10	0.984532	0.0154573
PBC_Cordell_2021	chr17	46088069	rs3912060	LCL	ATAC_chr17_46135995_46136584	0.00586052	551	45988303	46121924	6.44985	15.3756	16.7612	106.935	122.753	123.695	0.00762973	0.00763546	0.00802058	0.530413	5.18356e-49	7.53174e-10	0.00586052	0.994139
PBC_Cordell_2021	chr17	46088069	rs3912060	LCL	ATAC_chr17_46142418_46142685	0.0113607	551	45988303	46121924	6.44985	7.17967	16.7612	18.952	35.3773	35.7114	0.00768449	0.0076882	0.00845173	0.52663	8.49562e-11	7.60087e-10	0.0113607	0.988639
PBC_Cordell_2021	chr18	69858790	rs1808094	LCL	ATAC_chr18_69870394_69872231	0.995071	167	69758904	69896479	5.94353	9.34147	12.4633	37.5336	51.0663	49.9613	0.00761594	0.00762141	0.531186	0.00794446	2.45062e-19	1.89435e-08	0.995071	0.00492943
PBC_Cordell_2021	chr19	18125072	rs1811241	LCL	ATAC_chr19_18107778_18108423	0.996983	254	18026684	18225008	5.40297	4.85629	8.49854	6.6082	16.6579	15.0802	0.00760273	0.00760538	0.532464	0.00779289	4.07212e-06	6.15183e-07	0.996983	0.00301258
RA_Ishigaki_2021_EUR	chr1	2592267	rs867435	LCL	ATAC_chr1_2554629_2557863	0.989916	318	2492683	2687789	6.56618	5.35789	16.4117	8.65668	25.5022	25.0613	0.00767137	0.00767467	0.52754	0.00834958	1.62278e-06	6.95833e-10	0.989916	0.0100819
RA_Ishigaki_2021_EUR	chr1	2592267	rs867435	LCL	ATAC_chr1_2652189_2688564	0.985957	318	2492683	2687789	6.56618	9.55262	16.4117	38.7496	55.3012	55.1525	0.00770986	0.0077041	0.52482	0.0086736	1.86792e-19	9.3813e-10	0.985957	0.014043
RA_Ishigaki_2021_EUR	chr1	38169790	rs2045793	LCL	ATAC_chr1_38173053_38174797	0.999533	416	38070198	38269752	6.34641	9.32872	13.0379	34.1953	50.5271	47.1104	0.00757948	0.00757626	0.534262	0.00761237	7.41859e-19	1.14471e-09	0.999533	0.000467403
RA_Ishigaki_2021_EUR	chr1	67336688	rs6659932	LCL	ATAC_chr1_67274610_67275186	0.984852	435	67236843	67436539	5.78977	8.12856	9.94317	25.9342	35.9571	35.8725	0.00771785	0.00772261	0.523863	0.00876849	7.31027e-14	6.44162e-07	0.984852	0.0151473
RA_Ishigaki_2021_EUR	chr1	67336688	rs6659932	LCL	ATAC_chr1_67334857_67337572	0.998963	435	67236843	67436539	5.78977	4.21354	9.94317	2.58266	15.1739	12.474	0.00758727	0.00758639	0.533913	0.00764191	7.59453e-05	4.8286e-08	0.998963	0.000961006
RA_Ishigaki_2021_EUR	chr1	173378335	rs4916340	LCL	ATAC_chr1_173359993_173361481	0.998377	483	173278489	173477795	5.64865	4.78114	9.72345	5.69849	17.5756	15.3891	0.00758418	0.00758941	0.533518	0.0076943	5.51981e-06	9.8674e-08	0.998377	0.00161709
RA_Ishigaki_2021_EUR	chr1	243324559	rs12058508	LCL	ATAC_chr1_243264076_243265137	0.00718929	260	243225068	243421043	5.16667	17.17	6.53499	137.25	143.03	143.78	0.00764126	0.00765004	0.00811958	0.529625	3.55781e-62	2.09258e-05	0.00718929	0.99279
RA_Ishigaki_2021_EUR	chr1	243324559	rs12058508	LCL	ATAC_chr1_243336084_243336701	2.40709e-06	260	243225068	243421043	5.16667	11.8752	6.53499	63.4921	61.3472	70.0271	0.00757616	0.00757357	0.00757084	0.534577	3.77704e-30	2.05669e-05	2.40709e-06	0.999977
RA_Ishigaki_2021_EUR	chr2	60897715	rs34695944	LCL	ATAC_chr2_60878747_60879157	0.996237	309	60799042	60997124	8.03101	7.57085	24.7257	20.6285	46.691	45.3282	0.00761206	0.00761659	0.5319	0.00785115	4.11722e-12	6.84651e-14	0.996237	0.00376349
RA_Ishigaki_2021_EUR	chr2	65371772	rs74313386	LCL	ATAC_chr2_65379320_65380122	0.0118764	515	65272194	65471095	7.28148	5.24714	20.0862	7.92681	27.7156	28.0104	0.00768644	0.0076879	0.00849463	0.526311	5.22258e-06	2.73649e-11	0.0118764	0.988118
RA_Ishigaki_2021_EUR	chr2	65371772	rs74313386	LCL	ATAC_chr2_65381005_65384218	0.98465	515	65272194	65471095	7.28148	5.31565	20.0862	7.3435	27.4994	27.4266	0.00772593	0.00772392	0.523844	0.00877782	8.76067e-06	2.5605e-11	0.98465	0.0153414
RA_Ishigaki_2021_EUR	chr2	100240555	rs12474386	LCL	ATAC_chr2_100151372_100151569	0.000640628	574	100140818	100340487	7.75194	14.2823	22.2385	94.1302	113.267	116.368	0.00757837	0.0075796	0.00761562	0.534165	1.86844e-43	3.11701e-12	0.000640628	0.999359
RA_Ishigaki_2021_EUR	chr2	100240555	rs12474386	LCL	ATAC_chr2_100260807_100261050	0.00937763	574	100140818	100340487	7.75194	6.77444	22.2385	14.0456	35.7757	36.2821	0.00765927	0.00766126	0.00829402	0.527994	1.1439e-08	3.16503e-12	0.00937763	0.990622
RA_Ishigaki_2021_EUR	chr2	110843901	rs11123201	LCL	ATAC_chr2_110858055_110859573	0.999449	300	110754031	110943899	5.01325	5.36637	5.15375	6.98884	15.2611	12.0003	0.00758322	0.00758112	0.534173	0.00761786	5.78569e-07	3.62417e-06	0.999449	0.000546693
RA_Ishigaki_2021_EUR	chr3	17005374	rs5019428	LCL	ATAC_chr3_16932408_16933594	0.0119838	380	16905959	17104600	6.93382	6.28529	17.0162	11.4764	28.2027	28.4893	0.00769381	0.00768643	0.00850035	0.526196	1.50338e-07	5.89838e-10	0.0119838	0.988016
RA_Ishigaki_2021_EUR	chr3	17005374	rs5019428	LCL	ATAC_chr3_16994822_16995467	0.986948	380	16905959	17104600	6.93382	6.13365	17.0162	12.1227	29.3444	29.1323	0.00769644	0.00770966	0.52538	0.00858941	6.39812e-08	4.80377e-10	0.986948	0.0130523
RA_Ishigaki_2021_EUR	chr3	17005374	rs5019428	LCL	ATAC_chr3_17034986_17035526	0.00757237	380	16905959	17104600	6.93382	4.378	17.0162	4.29945	20.6117	21.3137	0.00765894	0.00765424	0.00814911	0.529179	0.00019534	5.85754e-10	0.00757237	0.992232
RA_Ishigaki_2021_EUR	chr3	106216106	rs13090803	LCL	ATAC_chr3_106248162_106248674	0.991078	409	106116336	106315966	4.93671	5.96314	5.88228	12.1543	18.582	18.0284	0.00765956	0.0076569	0.528429	0.00825312	4.38448e-08	2.32103e-05	0.991078	0.00889826
RA_Ishigaki_2021_EUR	chr3	106216106	rs13090803	LCL	ATAC_chr3_106251103_106251779	0.994858	409	106116336	106315966	4.93671	5.19283	5.88228	8.31327	15.25	14.1817	0.00762394	0.00762885	0.530929	0.00796285	1.22049e-06	1.38861e-05	0.994858	0.00512641
RA_Ishigaki_2021_EUR	chr4	10707742	rs6831973	LCL	ATAC_chr4_10724591_10725434	0.997067	633	10608125	10807374	5.31013	5.34826	6.32074	8.10526	16.0173	14.4105	0.0076021	0.00760182	0.532444	0.00779349	8.75439e-07	5.21453e-06	0.997067	0.0029266
RA_Ishigaki_2021_EUR	chr4	26102491	rs12506688	LCL	ATAC_chr4_26124973_26128326	0.998474	464	26003435	26202093	9.66423	6.22433	39.5309	12.7645	54.5108	52.267	0.00758802	0.00758934	0.5336	0.00768888	4.43131e-09	1.05222e-20	0.998474	0.00152578
RA_Ishigaki_2021_EUR	chr4	48218822	rs2664035	LCL	ATAC_chr4_48200048_48201912	0.998494	575	48120126	48318413	6.26923	4.90611	11.0323	3.76364	17.0463	14.7669	0.00758475	0.00758601	0.533689	0.00768224	3.46847e-05	2.41808e-08	0.998494	0.001471
RA_Ishigaki_2021_EUR	chr4	48691230	rs6829081	LCL	ATAC_chr4_48756805_48757440	0.997165	155	48592642	48788319	4.97661	7.53943	6.72393	21.08	29.3695	27.7316	0.00759974	0.007605	0.532681	0.00778129	2.08085e-12	3.57517e-06	0.997165	0.00283157
RA_Ishigaki_2021_EUR	chr5	10690637	rs5745271	LCL	ATAC_chr5_10698419_10701460	0.99791	663	10591020	10790438	5.71756	5.82087	9.57724	10.2557	21.7511	19.8163	0.00759177	0.00759628	0.533191	0.00772932	7.33715e-08	1.44691e-07	0.99791	0.00208973
RA_Ishigaki_2021_EUR	chr5	102826207	rs468836	LCL	ATAC_chr5_102778228_102778970	0.00478688	296	102726346	102926155	4.94737	5.0677	7.11177	5.57762	11.5544	12.6874	0.00762933	0.00762316	0.00793378	0.531203	5.41544e-05	1.16683e-05	0.00478688	0.995145
RA_Ishigaki_2021_EUR	chr5	102826207	rs468836	LCL	ATAC_chr5_102801434_102801672	0.987931	296	102726346	102926155	4.94737	4.66288	7.11177	6.4087	13.7948	13.5125	0.00768862	0.00768915	0.526243	0.00850631	1.80716e-05	8.94716e-06	0.987931	0.0120416
RA_Ishigaki_2021_EUR	chr5	103291596	rs11351744	LCL	ATAC_chr5_103208305_103208791	0.991748	240	103192391	103390871	6.61594	4.68034	15.8543	4.67814	21.1495	20.5186	0.00765365	0.00765256	0.528841	0.00819832	7.19826e-05	1.00796e-09	0.991748	0.00818042
RA_Ishigaki_2021_EUR	chr5	103291596	rs11351744	LCL	ATAC_chr5_103260648_103261609	0.993359	240	103192391	103390871	6.61594	17.25	15.8543	142.325	158.98	158.156	0.00763936	0.0076412	0.529954	0.00807552	9.93633e-65	8.36892e-10	0.993359	0.006641
RA_Ishigaki_2021_EUR	chr5	103291596	rs11351744	LCL	ATAC_chr5_103340730_103342291	0.00809054	240	103192391	103390871	6.61594	7.62062	15.8543	22.0472	37.2561	37.8974	0.00764757	0.00764733	0.00819225	0.528932	3.83154e-12	1.87459e-09	0.00809054	0.991909
RA_Ishigaki_2021_EUR	chr5	103291596	rs11351744	LCL	ATAC_chr5_103343518_103343864	0.00340523	240	103192391	103390871	6.61594	5.64454	15.8543	9.07395	23.4661	24.9265	0.0076026	0.0076168	0.00783383	0.532273	1.63429e-06	1.85991e-09	0.00340523	0.996593
RA_Ishigaki_2021_EUR	chr5	103291596	rs11351744	LCL	ATAC_chr5_103345274_103347098	0.000501596	240	103192391	103390871	6.61594	19.2211	15.8543	175.549	188.056	191.403	0.00758202	0.00757947	0.00761468	0.534215	8.16687e-79	1.847e-09	0.000501596	0.999498
RA_Ishigaki_2021_EUR	chr5	103291596	rs11351744	LCL	ATAC_chr5_103347266_103348906	0.000413999	240	103192391	103390871	6.61594	11.2766	15.8543	55.4566	67.7736	71.3105	0.00757942	0.00757427	0.00760347	0.534307	1.16769e-26	1.84543e-09	0.000413999	0.999586
RA_Ishigaki_2021_EUR	chr5	103291596	rs11351744	LCL	ATAC_chr5_103350024_103350474	0.985326	240	103192391	103390871	6.61594	5.83882	15.8543	12.2207	28.1765	28.0655	0.00771284	0.00770624	0.524371	0.00872613	6.45155e-08	1.70323e-09	0.985326	0.0146739
RA_Ishigaki_2021_EUR	chr6	442924	rs7773690	LCL	ATAC_chr6_381613_382527	0.00775465	493	362753	542868	5.22556	5.87397	6.24733	8.77389	14.3393	15.0191	0.00765146	0.00765534	0.00815988	0.529079	2.22494e-06	2.78489e-05	0.00775465	0.992215
RA_Ishigaki_2021_EUR	chr6	15195451	rs113532504	LCL	ATAC_chr6_15234399_15234671	0.000664702	694	15095543	15295160	5.65116	10.887	8.43112	51.5427	56.9085	59.9736	0.00757903	0.00757985	0.00761798	0.534266	5.84726e-25	3.09101e-06	0.000664702	0.999332
RA_Ishigaki_2021_EUR	chr6	137678425	rs35926684	LCL	ATAC_chr6_137680803_137681284	0.99957	530	137578611	137777796	11.6689	6.03271	58.376	10.7082	72.519	69.0197	0.0075727	0.00757863	0.534335	0.00760279	1.02096e-08	2.03007e-29	0.99957	0.000429792
RA_Ishigaki_2021_EUR	chr7	37342861	rs60600003	LCL	ATAC_chr7_37340793_37343675	0.998629	658	37246031	37442822	5.00481	4.96754	5.67608	5.99818	14.0067	11.6517	0.00758893	0.00758546	0.533585	0.00767156	3.42327e-06	4.72202e-06	0.998629	0.00136242
RA_Ishigaki_2021_EUR	chr7	128935498	rs3778754	LCL	ATAC_chr7_128953895_128954527	9.4713e-06	348	128835777	129035495	8.41237	8.21542	29.2162	26.0445	47.95	55.2607	0.00757645	0.00756962	0.00757544	0.534567	6.92612e-14	2.90148e-15	9.4713e-06	0.999991
RA_Ishigaki_2021_EUR	chr8	11493711	rs1382568	LCL	ATAC_chr8_11413434_11414105	0.998911	734	11393931	11593228	6.68323	4.20485	14.9667	2.20434	19.8288	17.1463	0.00759494	0.00758723	0.533771	0.00764683	0.000109921	3.148e-10	0.998911	0.00097867
RA_Ishigaki_2021_EUR	chr8	11493711	rs1382568	LCL	ATAC_chr8_11416598_11420162	0.999385	734	11393931	11593228	6.68323	5.99978	14.9667	10.3172	28.3813	25.2368	0.00757966	0.00758214	0.534155	0.00762262	2.11744e-08	2.02643e-10	0.999385	0.000614543
RA_Ishigaki_2021_EUR	chr8	11493711	rs1382568	LCL	ATAC_chr8_11439929_11441738	0.999047	734	11393931	11593228	6.68323	4.68543	14.9667	4.53219	22.1899	19.47	0.00758253	0.00758307	0.533833	0.00764543	1.03506e-05	3.04341e-10	0.999047	0.000942591
RA_Ishigaki_2021_EUR	chr8	11493711	rs1382568	LCL	ATAC_chr8_11457128_11459551	0.999575	734	11393931	11593228	6.68323	6.48261	14.9667	13.8859	32.2877	28.7777	0.00757425	0.00757952	0.534307	0.00760375	4.25541e-10	1.44509e-10	0.999575	0.000425284
RA_Ishigaki_2021_EUR	chr8	11493711	rs1382568	LCL	ATAC_chr8_11464486_11468521	0.998417	734	11393931	11593228	6.68323	10.0483	14.9667	41.4457	58.5961	56.3884	0.00758882	0.00759157	0.533382	0.00768926	1.60108e-21	5.06115e-10	0.998417	0.00158253
RA_Ishigaki_2021_EUR	chr8	11493711	rs1382568	LCL	ATAC_chr8_11479546_11480899	0.999495	734	11393931	11593228	6.68323	16.0724	14.9667	120.542	138.765	135.426	0.00758202	0.00757947	0.534215	0.00761468	2.43726e-56	1.72811e-10	0.999495	0.000505434
RA_Ishigaki_2021_EUR	chr8	11493711	rs1382568	LCL	ATAC_chr8_11481446_11484898	0.998216	734	11393931	11593228	6.68323	9.91638	14.9667	40.279	57.3174	55.2277	0.00759393	0.00759147	0.533406	0.00770679	5.75349e-21	5.65999e-10	0.998216	0.00178441
RA_Ishigaki_2021_EUR	chr8	11493711	rs1382568	LCL	ATAC_chr8_11485121_11486501	0.998199	734	11393931	11593228	6.68323	6.53825	14.9667	12.8925	29.9204	27.839	0.00758693	0.00759298	0.533381	0.0077118	4.54915e-09	5.72098e-10	0.998199	0.00180058
RA_Ishigaki_2021_EUR	chr8	11493711	rs1382568	LCL	ATAC_chr8_11490359_11490671	0.998322	734	11393931	11593228	6.68323	4.6771	14.9667	3.73303	20.8553	18.6817	0.00759833	0.00759202	0.533402	0.00769669	3.94032e-05	5.20556e-10	0.998322	0.00163886
RA_Ishigaki_2021_EUR	chr8	11493711	rs1382568	LCL	ATAC_chr8_11491343_11495915	0.999041	734	11393931	11593228	6.68323	5.66828	14.9667	7.70325	25.3465	22.6438	0.00758253	0.00758307	0.533833	0.00764543	4.40645e-07	3.08789e-10	0.999041	0.00095899
RA_Ishigaki_2021_EUR	chr8	11493711	rs1382568	LCL	ATAC_chr8_11496122_11500482	0.999556	734	11393931	11593228	6.68323	4.25364	14.9667	2.76543	21.2032	17.6729	0.00758163	0.00757371	0.534268	0.00760111	2.77541e-05	1.39298e-10	0.999556	0.000416637
RA_Ishigaki_2021_EUR	chr8	11493711	rs1382568	LCL	ATAC_chr8_11503065_11504187	0.998442	734	11393931	11593228	6.68323	5.95885	14.9667	9.33088	26.4992	24.2752	0.00758296	0.00759164	0.533494	0.0076932	1.39158e-07	4.97065e-10	0.998442	0.00155749
RA_Ishigaki_2021_EUR	chr8	11493711	rs1382568	LCL	ATAC_chr8_11505523_11509520	0.999571	734	11393931	11593228	6.68323	6.39954	14.9667	13.3991	31.7933	28.2927	0.0075727	0.00757863	0.534335	0.00760279	6.9752e-10	1.45577e-10	0.999571	0.000429264
RA_Ishigaki_2021_EUR	chr8	11493711	rs1382568	LCL	ATAC_chr8_11510290_11510470	0.998986	734	11393931	11593228	6.68323	5.01922	14.9667	5.63036	23.2175	20.5665	0.00758794	0.00758796	0.533903	0.00765075	3.70603e-06	3.26742e-10	0.998986	0.00101035
RA_Ishigaki_2021_EUR	chr8	11493711	rs1382568	LCL	ATAC_chr8_11524509_11525190	0.996693	734	11393931	11593228	6.68323	5.6452	14.9667	8.59615	25.0394	23.5518	0.00760174	0.00760224	0.532373	0.0078169	6.00781e-07	1.02818e-09	0.996693	0.00330607
RA_Ishigaki_2021_EUR	chr8	11493711	rs1382568	LCL	ATAC_chr8_11532687_11535132	0.99954	734	11393931	11593228	6.68323	6.36098	14.9667	12.3678	30.7057	27.272	0.00757626	0.00757948	0.534262	0.00761237	2.07071e-09	1.54043e-10	0.99954	0.000459519
RA_Ishigaki_2021_EUR	chr8	80396260	rs6984791	LCL	ATAC_chr8_80363556_80365184	0.986361	393	80296726	80496174	4.97126	5.01854	6.36191	7.3288	13.8632	13.6861	0.00770171	0.00771597	0.524869	0.00864429	7.9947e-06	2.10631e-05	0.986361	0.0136087
RA_Ishigaki_2021_EUR	chr10	6357395	rs11258264	LCL	ATAC_chr10_6347180_6348902	0.999357	577	6257810	6457266	6.42169	4.62395	13.2968	2.82207	19.2279	16.0677	0.00757976	0.00758098	0.534157	0.0076228	3.766e-05	1.06374e-09	0.999357	0.000604969
RA_Ishigaki_2021_EUR	chr10	31090176	rs2793108	LCL	ATAC_chr10_31087466_31088042	0.993363	562	30990280	31190174	5.44961	6.00425	7.38185	9.14268	17.3411	16.516	0.00763325	0.00764721	0.530015	0.00807521	6.76543e-07	3.94282e-06	0.993363	0.00663188
RA_Ishigaki_2021_EUR	chr10	31090176	rs2793108	LCL	ATAC_chr10_31090370_31091422	0.998742	562	30990280	31190174	5.44961	27.6155	7.38185	371.617	381.377	378.942	0.00758808	0.00758653	0.533753	0.00766533	5.35006e-165	8.19399e-07	0.998742	0.00125675
RA_Ishigaki_2021_EUR	chr10	31090176	rs2793108	LCL	ATAC_chr10_31099715_31101757	0.999151	562	30990280	31190174	5.44961	11.0438	7.38185	52.9636	63.1127	60.2889	0.00758727	0.00758348	0.534008	0.0076383	8.88313e-27	5.54943e-07	0.999151	0.000848584
RA_Ishigaki_2021_EUR	chr10	31090176	rs2793108	LCL	ATAC_chr10_31104508_31105235	0.999157	562	30990280	31190174	5.44961	5.74061	7.38185	9.31844	19.4757	16.645	0.00758727	0.00758348	0.534008	0.0076383	7.9411e-08	5.50442e-07	0.999157	0.000842771
RA_Ishigaki_2021_EUR	chr10	31090176	rs2793108	LCL	ATAC_chr10_31146256_31147576	0.00213155	562	30990280	31190174	5.44961	7.52496	7.38185	18.9924	24.4586	26.3736	0.00759733	0.0075888	0.00772929	0.533136	8.03291e-11	8.84683e-06	0.00213155	0.99786
RA_Ishigaki_2021_EUR	chr10	31090176	rs2793108	LCL	ATAC_chr10_31151328_31151574	0.998055	562	30990280	31190174	5.44961	5.35806	7.38185	7.31249	16.6736	14.6687	0.00758288	0.00758733	0.533414	0.00770771	1.30793e-06	1.221e-06	0.998055	0.00194222
RA_Ishigaki_2021_EUR	chr11	61128363	rs7124430	LCL	ATAC_chr11_61167044_61167904	0.991432	412	61028435	61211655	5.22137	4.97343	7.16598	7.15168	14.8999	14.3104	0.0076596	0.00765585	0.528669	0.00822597	6.28739e-06	6.19506e-06	0.991432	0.00855543
RA_Ishigaki_2021_EUR	chr11	61779596	rs7943728	LCL	ATAC_chr11_61826768_61830134	0.999595	363	61679851	61878495	5.37705	5.75164	7.27495	9.13269	19.8274	16.2682	0.0075786	0.00757434	0.534306	0.00760116	5.01381e-08	3.21166e-07	0.999595	0.000404736
RA_Ishigaki_2021_EUR	chr11	95578258	rs4409785	LCL	ATAC_chr11_95577716_95578356	0.999976	571	95478275	95677302	4.91176	11.9571	3.26638	60.989	69.3825	62.857	0.00757616	0.00757084	0.534577	0.00757357	2.73885e-31	3.20533e-06	0.999976	2.07628e-05
RA_Ishigaki_2021_EUR	chr11	118871133	rs4938573	LCL	ATAC_chr11_118870007_118871173	0.994163	454	118771297	118971051	7.4	5.44256	20.703	8.34956	29.9907	29.0451	0.00763362	0.00763279	0.530409	0.00801542	1.32429e-06	5.7136e-12	0.994163	0.00583584
RA_Ishigaki_2021_EUR	chr11	128634278	rs11400191	LCL	ATAC_chr11_128685844_128687985	0.998198	390	128534630	128734127	5.27068	4.78429	6.3556	4.63927	13.0519	10.9596	0.00759538	0.00759463	0.533277	0.00770454	1.75658e-05	3.1567e-06	0.998198	0.00177977
RA_Ishigaki_2021_EUR	chr12	55985643	rs1873914	LCL	ATAC_chr12_56041258_56042815	0.994291	137	55887108	56084874	5.86154	4.31501	11.1145	4.79873	16.8688	15.8945	0.00763171	0.00763107	0.530554	0.00800612	4.5325e-05	8.19194e-08	0.994291	0.00566327
RA_Ishigaki_2021_EUR	chr13	39744682	rs9603608	LCL	ATAC_chr13_39760504_39761124	0.997557	524	39644817	39842911	7.93431	12.2597	24.7573	65.775	92.2934	90.512	0.00759126	0.00760567	0.532883	0.00775	6.63857e-32	4.33184e-14	0.997557	0.00244327
RA_Ishigaki_2021_EUR	chr13	39744682	rs9603608	LCL	ATAC_chr13_39776473_39778056	0.998861	524	39644817	39842911	7.93431	10.2276	24.7573	45.2573	72.5071	69.9747	0.00758348	0.00758941	0.533786	0.00766155	2.59734e-23	2.07931e-14	0.998861	0.00113939
RA_Ishigaki_2021_EUR	chr14	68287978	rs1885013	LCL	ATAC_chr14_68305439_68307146	0.991099	361	68190195	68386866	5.36879	4.45571	7.85363	4.75897	13.1682	12.6061	0.00766194	0.00766002	0.528376	0.00825375	7.07039e-05	3.20142e-06	0.991099	0.00882569
RA_Ishigaki_2021_EUR	chr14	68287978	rs1885013	LCL	ATAC_chr14_68308938_68309433	0.00596167	361	68190195	68386866	5.36879	5.90134	7.85363	11.7499	18.6767	19.6013	0.00762889	0.00763551	0.0080204	0.530503	1.13042e-07	5.56881e-06	0.00596167	0.994033
RA_Ishigaki_2021_EUR	chr14	68287978	rs1885013	LCL	ATAC_chr14_68340196_68340659	0.998218	361	68190195	68386866	5.36879	4.19733	7.85363	3.1571	13.1072	10.9725	0.00759454	0.00758936	0.533237	0.00770071	7.43411e-05	6.78041e-07	0.998218	0.00170511
RA_Ishigaki_2021_EUR	chr15	38554477	rs7170151	LCL	ATAC_chr15_38555237_38556763	0.984252	304	38455114	38654364	7.14685	6.26089	18.6667	12.3836	31.0962	31.0441	0.00771422	0.00772783	0.523461	0.00882387	5.79981e-08	1.08509e-10	0.984252	0.0157478
RA_Ishigaki_2021_EUR	chr15	38554477	rs7170151	LCL	ATAC_chr15_38558489_38558964	0.995416	304	38455114	38654364	7.14685	8.71573	18.6667	28.9827	48.7975	47.624	0.00762069	0.00762234	0.531401	0.00791175	1.17196e-15	3.54171e-11	0.995416	0.00458376
RA_Ishigaki_2021_EUR	chr16	11704902	rs4584833	LCL	ATAC_chr16_11671848_11673740	0.0155021	514	11605444	11804622	6.26866	4.5949	12.5965	4.23262	16.7613	16.8267	0.0077461	0.00772675	0.00880144	0.523469	0.000211912	4.92813e-08	0.0155021	0.984286
RA_Ishigaki_2021_EUR	chr16	30153437	rs62055376	LCL	ATAC_chr16_30123206_30123717	0.00742573	140	30055011	30253325	5.23704	6.73414	7.67464	16.2902	23.239	23.9591	0.0076476	0.00764212	0.00813811	0.529431	1.21408e-09	6.69333e-06	0.00742573	0.992568
RA_Ishigaki_2021_EUR	chr17	39882138	rs62067029	LCL	ATAC_chr17_39915643_39915912	0.00213349	344	39783586	39981845	6.30303	6.6813	13.733	16.2253	28.0432	29.9576	0.00758911	0.00759638	0.00773128	0.533101	1.27703e-09	1.54524e-08	0.00213349	0.997866
RA_Ishigaki_2021_EUR	chr17	39882138	rs62067029	LCL	ATAC_chr17_39916567_39916765	0.013485	344	39783586	39981845	6.30303	4.27859	13.733	4.32456	17.8697	18.054	0.00771663	0.00770465	0.00863185	0.525079	0.000192597	1.57733e-08	0.013485	0.986322
RA_Ishigaki_2021_EUR	chr17	39882138	rs62067029	LCL	ATAC_chr17_39920149_39921796	0.988768	344	39783586	39981845	6.30303	7.19881	13.733	17.6719	31.7422	31.3972	0.00767779	0.00767823	0.526765	0.00844925	2.17492e-10	1.11707e-08	0.988768	0.0112321
RA_Ishigaki_2021_EUR	chr17	39882138	rs62067029	LCL	ATAC_chr17_39938036_39938472	0.0107939	344	39783586	39981845	6.30303	4.83096	13.733	6.0651	19.4163	19.7955	0.00768632	0.00768108	0.00840235	0.526998	3.35977e-05	1.56988e-08	0.0107939	0.989172
RA_Ishigaki_2021_EUR	chr17	39882138	rs62067029	LCL	ATAC_chr17_39939480_39940401	0.00357188	344	39783586	39981845	6.30303	6.95332	13.733	16.3628	28.6808	30.0946	0.00761387	0.0076121	0.00784138	0.532023	1.11787e-09	1.5501e-08	0.00357188	0.996428
RA_Ishigaki_2021_EUR	chr19	19454548	rs113980591	LCL	ATAC_chr19_19457725_19461699	0.99032	295	19354720	19553268	5.15591	4.09657	8.13888	1.85126	10.5907	9.98242	0.00775187	0.00766608	0.5278	0.0082289	0.00125282	2.30342e-06	0.99032	0.00840349
RA_Ishigaki_2021_EUR	chr19	19454548	rs113980591	LCL	ATAC_chr19_19524071_19524582	0.00118868	295	19354720	19553268	5.15591	4.99381	8.13888	8.19024	13.8386	16.3286	0.00758891	0.00758223	0.00766109	0.533695	3.94106e-06	4.1451e-06	0.00118868	0.998803
RA_Ishigaki_2021_EUR	chr20	46120612	rs4239702	LCL	ATAC_chr20_46120357_46121013	0.999513	400	46021679	46220198	7.19444	4.23119	18.0263	1.46144	22.9598	19.3501	0.00758028	0.00757807	0.534238	0.00760327	0.000102137	6.53154e-12	0.999513	0.000384937
RA_Ishigaki_2021_EUR	chr21	33406648	rs35138843	LCL	ATAC_chr21_33401007_33401273	0.998614	521	33306681	33506143	5.89109	4.14814	10.8423	2.37633	15.6145	13.1854	0.00759308	0.00758603	0.533573	0.00767407	0.000120244	2.52895e-08	0.998614	0.00126555
RA_Ishigaki_2021_EUR	chr21	35365944	rs8133843	LCL	ATAC_chr21_35342309_35343707	0.999785	496	35266234	35465761	6.07857	11.0436	10.1658	51.9758	66.0955	61.9062	0.00757658	0.00757239	0.534383	0.00758973	7.27054e-27	1.04521e-08	0.999785	0.000215238
SLE_Bentham_2015	chr2	134289413	rs4954125	LCL	ATAC_chr2_134288642_134291487	0.995975	326	134190779	134388947	5.34981	5.46953	7.83386	7.57092	16.6919	15.3919	0.00761174	0.00760906	0.531812	0.00787844	2.02751e-06	1.55818e-06	0.995975	0.00402093
SLE_Bentham_2015	chr3	58443408	rs62259783	LCL	ATAC_chr3_58401559_58401880	0.00550307	397	58343535	58541467	5.3609	6.11238	9.55408	12.4574	21.0096	22.0102	0.00762542	0.00762181	0.00798927	0.530807	5.56279e-08	1.01386e-06	0.00550307	0.994496
SLE_Bentham_2015	chr3	160030580	rs112992337	LCL	ATAC_chr3_160005886_160007265	0.998	367	159930612	160128371	5.20954	4.34271	7.82814	4.78244	14.576	12.589	0.00758998	0.00759148	0.5332	0.00772347	1.66694e-05	7.93003e-07	0.998	0.00198197
SLE_Bentham_2015	chr4	101822530	rs13136219	LCL	ATAC_chr4_101804302_101804606	0.992085	424	101722673	101920448	6.27462	4.65979	13.4974	3.42409	17.6059	16.9162	0.00766972	0.00765058	0.529078	0.00816189	0.00023631	9.94554e-09	0.992085	0.0076783
SLE_Bentham_2015	chr4	101822530	rs13136219	LCL	ATAC_chr4_101833224_101833658	0.993382	424	101722673	101920448	6.27462	5.09582	13.4974	6.36681	20.6868	19.8581	0.00763572	0.00763545	0.529945	0.00807335	1.07997e-05	8.64243e-09	0.993382	0.00660736
SLE_Bentham_2015	chr4	101822530	rs13136219	LCL	ATAC_chr4_101850529_101852097	0.00387568	424	101722673	101920448	6.27462	7.79099	13.4974	23.4376	35.5992	36.9343	0.00761234	0.00760747	0.00786425	0.531851	9.45162e-13	1.9599e-08	0.00387568	0.996124
SLE_Bentham_2015	chr5	100848943	rs55849330	LCL	ATAC_chr5_100789559_100790896	0.00033643	253	100749174	100948704	4.92563	13.2758	7.719	80.5427	84.5171	88.2615	0.00757931	0.00757941	0.0076039	0.53434	1.48759e-37	6.30133e-06	0.00033643	0.999657
SLE_Bentham_2015	chr5	100848943	rs55849330	LCL	ATAC_chr5_100800097_100801367	0.0160418	253	100749174	100948704	4.92563	4.35863	7.719	5.47727	13.1563	13.1916	0.00773511	0.00773162	0.00883774	0.523228	6.10942e-05	6.48978e-06	0.0160418	0.983889
SLE_Bentham_2015	chr5	100848943	rs55849330	LCL	ATAC_chr5_100817339_100818933	0.988107	253	100749174	100948704	4.92563	5.2538	7.719	9.01321	17.0192	16.7255	0.00768713	0.00769266	0.526283	0.00849214	1.31926e-06	4.81625e-06	0.988107	0.0118868
SLE_Bentham_2015	chr5	100848943	rs55849330	LCL	ATAC_chr5_100837020_100838527	0.00688159	253	100749174	100948704	4.92563	4.81327	7.719	6.47624	13.4022	14.1931	0.00763648	0.00764183	0.00809631	0.529788	2.20856e-05	6.37802e-06	0.00688159	0.993089
SLE_Bentham_2015	chr5	160460329	rs2431098	LCL	ATAC_chr5_160451826_160454536	0.999923	343	160360835	160559921	7.92722	5.51608	22.6884	7.48487	35.0024	29.7854	0.00757439	0.00756923	0.534553	0.00758112	6.35992e-08	1.58609e-14	0.999923	7.69148e-05
SLE_Bentham_2015	chr8	10727132	rs11774893	LCL	ATAC_chr8_10807459_10807911	0.00333577	623	10627320	10826912	4.98606	9.43455	5.61932	37.0113	41.1501	42.6299	0.00761108	0.00761088	0.00782414	0.532216	1.20336e-18	5.17315e-05	0.00333577	0.996613
SLE_Bentham_2015	chr8	11157106	rs34208825	LCL	ATAC_chr8_11071930_11072772	0.015749	480	11057497	11257057	5.65068	4.98855	9.65833	5.48143	15.0869	15.1375	0.0077251	0.00772047	0.00881258	0.523565	6.05963e-05	9.29349e-07	0.015749	0.984189
SLE_Bentham_2015	chr8	11482456	rs2736332	LCL	ATAC_chr8_11413434_11414105	0.999806	630	11383062	11582452	8.65722	4.20485	28.606	2.3001	35.2132	30.8142	0.00758143	0.00757499	0.53442	0.00759092	1.91563e-05	7.20186e-17	0.999806	0.000174533
SLE_Bentham_2015	chr8	11482456	rs2736332	LCL	ATAC_chr8_11416598_11420162	0.999912	630	11383062	11582452	8.65722	5.99978	28.606	10.4681	43.9893	38.9028	0.00757892	0.00757378	0.534513	0.00758573	2.95607e-09	3.91964e-17	0.999912	8.76908e-05
SLE_Bentham_2015	chr8	11482456	rs2736332	LCL	ATAC_chr8_11439929_11441738	0.999436	630	11383062	11582452	8.65722	4.68543	28.606	4.65747	36.4724	33.2343	0.00758036	0.00757696	0.534164	0.00761061	5.43811e-06	2.16047e-16	0.999436	0.000558779
SLE_Bentham_2015	chr8	11482456	rs2736332	LCL	ATAC_chr8_11457128_11459551	0.99954	630	11383062	11582452	8.65722	6.48261	28.606	14.0362	46.0368	42.6049	0.00757626	0.00757948	0.534262	0.00761237	3.81427e-10	1.79487e-16	0.99954	0.0004604
SLE_Bentham_2015	chr8	11482456	rs2736332	LCL	ATAC_chr8_11464486_11468521	0.999948	630	11383062	11582452	8.65722	10.0483	28.606	41.5984	75.5026	69.8957	0.00757548	0.00757391	0.534588	0.00758004	6.08718e-23	2.67226e-17	0.999948	5.20678e-05
SLE_Bentham_2015	chr8	11482456	rs2736332	LCL	ATAC_chr8_11479546_11480899	0.998073	630	11383062	11582452	8.65722	16.0724	28.606	120.695	151.304	149.29	0.0075881	0.00758868	0.533355	0.00771743	7.3323e-56	7.22712e-16	0.998073	0.00192679
SLE_Bentham_2015	chr8	11482456	rs2736332	LCL	ATAC_chr8_11481446_11484898	0.999959	630	11383062	11582452	8.65722	9.91638	28.606	40.4318	74.5456	68.6921	0.00757634	0.0075745	0.53457	0.00758076	1.58538e-22	2.16735e-17	0.999959	4.06977e-05
SLE_Bentham_2015	chr8	11482456	rs2736332	LCL	ATAC_chr8_11485121_11486501	0.999945	630	11383062	11582452	8.65722	6.53825	28.606	13.037	46.9075	41.3549	0.00757387	0.00757296	0.534583	0.00758168	1.59593e-10	2.76345e-17	0.999945	5.49841e-05
SLE_Bentham_2015	chr8	11482456	rs2736332	LCL	ATAC_chr8_11490359_11490671	0.999883	630	11383062	11582452	8.65722	4.6771	28.606	3.83781	37.1278	32.3074	0.00757436	0.00757269	0.534518	0.00758801	2.82075e-06	4.93844e-17	0.999883	0.000114459
SLE_Bentham_2015	chr8	11482456	rs2736332	LCL	ATAC_chr8_11491343_11495915	0.999754	630	11383062	11582452	8.65722	5.66828	28.606	7.84054	40.4377	36.3812	0.00757744	0.0075752	0.534431	0.00759568	1.03059e-07	9.87747e-17	0.999754	0.000245954
SLE_Bentham_2015	chr8	11482456	rs2736332	LCL	ATAC_chr8_11496122_11500482	0.999461	630	11383062	11582452	8.65722	4.25364	28.606	2.87699	34.7808	31.45	0.00758325	0.00758346	0.534163	0.00761746	2.9528e-05	1.97828e-16	0.999461	0.000509715
SLE_Bentham_2015	chr8	11482456	rs2736332	LCL	ATAC_chr8_11503065_11504187	0.999952	630	11383062	11582452	8.65722	5.95885	28.606	9.48184	43.452	37.7721	0.0075745	0.00757634	0.53457	0.00758076	5.05552e-09	2.50243e-17	0.999952	4.8407e-05
SLE_Bentham_2015	chr8	11482456	rs2736332	LCL	ATAC_chr8_11505523_11509520	0.999092	630	11383062	11582452	8.65722	6.39954	28.606	13.5223	44.8656	42.1092	0.00758788	0.00758153	0.533913	0.00763957	1.23247e-09	3.46456e-16	0.999092	0.000908028
SLE_Bentham_2015	chr8	11482456	rs2736332	LCL	ATAC_chr8_11510290_11510470	0.999544	630	11383062	11582452	8.65722	5.01922	28.606	5.72658	37.7411	34.2958	0.00757626	0.00757948	0.534262	0.00761237	1.52819e-06	1.76997e-16	0.999544	0.000454263
SLE_Bentham_2015	chr8	11482456	rs2736332	LCL	ATAC_chr8_11524509_11525190	0.999918	630	11383062	11582452	8.65722	5.6452	28.606	8.05832	41.6133	36.4622	0.00757698	0.00757256	0.534496	0.00757513	3.18066e-08	3.78904e-17	0.999918	8.20953e-05
SLE_Bentham_2015	chr8	11482456	rs2736332	LCL	ATAC_chr8_11532687_11535132	0.998052	630	11383062	11582452	8.65722	6.36098	28.606	12.5143	43.1133	41.1116	0.00758288	0.00758733	0.533414	0.00770771	7.10324e-09	7.29758e-16	0.998052	0.0019484
SLE_Bentham_2015	chr11	35080191	rs353608	LCL	ATAC_chr11_35065904_35067624	0.985075	439	34980982	35179983	6.64994	13.1127	15.6823	77.4621	93.2371	93.141	0.00771986	0.0077182	0.524063	0.00874152	3.02034e-36	2.04463e-09	0.985075	0.0149254
SLE_Bentham_2015	chr11	35080191	rs353608	LCL	ATAC_chr11_35073754_35074271	0.996095	439	34980982	35179983	6.64994	6.03094	15.6823	11.6114	28.612	27.2849	0.00761117	0.00760889	0.531913	0.00786131	3.45642e-08	5.89581e-10	0.996095	0.00390518
SLE_Bentham_2015	chr12	128788960	rs35429841	LCL	ATAC_chr12_128793921_128800091	0.994241	610	128688987	128888555	5.40513	10.325	7.74677	45.3257	54.0241	53.0658	0.0076273	0.00763081	0.530506	0.00800915	1.1407e-22	2.3862e-06	0.994241	0.00575688
SLE_Bentham_2015	chr12	128788960	rs35429841	LCL	ATAC_chr12_128801863_128803207	0.993549	610	128688987	128888555	5.40513	4.64257	7.74677	4.41783	13.0229	12.1596	0.00765691	0.00763798	0.530113	0.00806235	7.33645e-05	2.62223e-06	0.993549	0.006373
SLE_Bentham_2015	chr12	128788960	rs35429841	LCL	ATAC_chr12_128813265_128814922	0.00126105	610	128688987	128888555	5.40513	9.69265	7.74677	39.9495	45.2648	47.6961	0.00758408	0.00758823	0.00766513	0.533775	6.34218e-20	6.13691e-06	0.00126105	0.998733
SLE_Bentham_2015	chr16	11083944	rs7200786	LCL	ATAC_chr16_11077545_11080279	0.996938	461	10984224	11183832	5.38596	7.07063	8.27367	18.1926	28.0165	26.4547	0.00760606	0.00760446	0.532439	0.00779419	3.7963e-11	7.70934e-07	0.996938	0.00306114
SLE_Bentham_2015	chr16	11083944	rs7200786	LCL	ATAC_chr16_11080500_11081190	0.99552	461	10984224	11183832	5.38596	5.52481	8.27367	8.2513	17.7127	16.5157	0.00761146	0.00761942	0.531486	0.00791311	1.1343e-06	1.11036e-06	0.99552	0.00447784
SLE_Bentham_2015	chr17	7330793	rs3809822	LCL	ATAC_chr17_7349790_7350724	0.995003	310	7230810	7429739	5.27972	12.8666	6.88022	72.4419	80.4004	79.3071	0.00762082	0.0076213	0.53105	0.00794995	1.67994e-34	4.99365e-06	0.995003	0.00499151
SLE_Bentham_2015	chr17	39850937	rs143123127	LCL	ATAC_chr17_39915643_39915912	0.996521	185	39751379	39950842	5.01563	6.61056	7.31272	16.743	25.4672	24.0279	0.00761108	0.00761196	0.532174	0.00783166	1.85982e-10	2.31772e-06	0.996521	0.00347672
SLE_Bentham_2015	chr17	39850937	rs143123127	LCL	ATAC_chr17_39916567_39916765	0.994628	185	39751379	39950842	5.01563	4.21758	7.31272	4.83902	13.1652	12.1334	0.00763256	0.00762303	0.530775	0.00797498	4.10888e-05	3.45833e-06	0.994628	0.00532589
SLE_Bentham_2015	chr17	39850937	rs143123127	LCL	ATAC_chr17_39920149_39921796	0.00514824	185	39751379	39950842	5.01563	6.77627	7.31272	17.5223	23.7687	24.8325	0.00762273	0.0076192	0.00796188	0.531011	3.51561e-10	9.54502e-06	0.00514824	0.994842
SLE_Bentham_2015	chr19	55251894	rs73068668	LCL	ATAC_chr19_55251157_55252066	0.999997	366	55153295	55350136	5.47416	7.19222	6.42461	16.2476	28.6462	20.005	0.00756962	0.00757645	0.534567	0.00757544	3.16487e-12	5.84568e-08	0.999997	2.50364e-06
UC_deLange_2017	chr1	2565210	rs7544646	LCL	ATAC_chr1_2554629_2557863	0.00643102	310	2465316	2650901	7.3	5.35789	18.249	8.53953	25.933	26.7869	0.00763372	0.00764138	0.00805901	0.530085	2.80275e-06	1.70323e-10	0.00643102	0.993566
UC_deLange_2017	chr1	2803608	rs897625	LCL	ATAC_chr1_2746576_2749224	0.994721	184	2768000	2902994	5.52	8.14138	9.32802	24.9154	35.2509	34.2104	0.0076228	0.00762428	0.53081	0.00797264	7.88356e-14	4.638e-07	0.994721	0.00527826
UC_deLange_2017	chr1	2803608	rs897625	LCL	ATAC_chr1_2756503_2759105	0.98648	184	2768000	2902994	5.52	11.4536	9.32802	57.2928	66.7857	66.6047	0.00769752	0.00769733	0.525252	0.00862623	1.6089e-27	1.08985e-06	0.98648	0.0135184
UC_deLange_2017	chr1	2803608	rs897625	LCL	ATAC_chr1_2771548_2774308	0.989375	184	2768000	2902994	5.52	4.91816	9.32802	7.07626	16.7843	16.3899	0.00768376	0.00767018	0.527108	0.00838993	8.33324e-06	8.75219e-07	0.989375	0.0106156
UC_deLange_2017	chr1	46356475	rs112124254	LCL	ATAC_chr1_46347931_46348538	0.012785	390	46256717	46456330	5.14286	6.65913	5.5167	14.3623	19.6452	19.876	0.00769445	0.00769619	0.00857336	0.52553	8.39062e-09	5.82783e-05	0.012785	0.987157
UC_deLange_2017	chr1	155192276	rs4072037	LCL	ATAC_chr1_155188723_155191816	0.00302711	243	155092683	155290592	5.23457	6.40024	6.98468	14.8208	20.2307	21.804	0.00760003	0.00760697	0.00779753	0.53251	5.21443e-09	1.32072e-05	0.00302711	0.99696
UC_deLange_2017	chr1	155192276	rs4072037	LCL	ATAC_chr1_155226415_155228276	0.996499	243	155092683	155290592	5.23457	4.61728	6.98468	5.65007	14.0475	12.6099	0.00761047	0.0076149	0.532072	0.00783431	1.22057e-05	3.21516e-06	0.996499	0.00348462
UC_deLange_2017	chr1	200905909	rs151062294	LCL	ATAC_chr1_200905415_200906301	0.999895	385	200806315	201003326	8.44017	4.60347	26.9729	2.75836	34.4224	29.4373	0.00757507	0.00757626	0.53453	0.00757722	8.24314e-06	2.51139e-16	0.999895	9.69377e-05
UC_deLange_2017	chr1	209785254	rs7526313	LCL	ATAC_chr1_209827281_209828650	0.998476	414	209686663	209884750	5.02525	4.59568	5.96786	2.77815	11.0254	8.70804	0.00758996	0.00758438	0.533616	0.00768421	9.03403e-05	3.71783e-06	0.998476	0.00141673
UC_deLange_2017	chr2	61446571	rs1186708	LCL	ATAC_chr2_61443302_61444182	0.988716	296	61347223	61545122	5.44444	5.56748	7.7718	10.3058	18.4108	18.0706	0.00768376	0.00767871	0.526669	0.00844272	3.45651e-07	4.35368e-06	0.988716	0.0112792
UC_deLange_2017	chr2	101997084	rs13022757	LCL	ATAC_chr2_101998677_101999764	0.995516	419	101897762	102096596	5.28025	4.17898	7.02253	2.46051	10.7509	9.47274	0.00763969	0.00761666	0.531367	0.00789159	0.00034398	3.58066e-06	0.995516	0.00411847
UC_deLange_2017	chr3	49921715	rs35275715	LCL	ATAC_chr3_49931052_49931264	0.000119841	238	49823245	50021177	6.5375	8.1398	14.7795	26.7298	36.7348	41.5092	0.00757269	0.00757436	0.00758801	0.534518	3.48859e-14	5.40419e-09	0.000119841	0.99988
UC_deLange_2017	chr5	554096	rs72704802	LCL	ATAC_chr5_629738_633409	0.987081	433	454617	653907	5.93689	6.55067	11.2601	13.5875	25.0634	24.8421	0.00770307	0.00770274	0.525491	0.00858147	1.46473e-08	1.50139e-07	0.987081	0.0129185
UC_deLange_2017	chr5	132397705	rs11739135	LCL	ATAC_chr5_132354129_132355534	0.995195	494	132301616	132496995	4.9875	4.91996	5.6819	6.32468	13.1304	11.9958	0.00762138	0.00762574	0.531229	0.00793429	8.31382e-06	1.58199e-05	0.995195	0.00477954
UC_deLange_2017	chr5	132397705	rs11739135	LCL	ATAC_chr5_132369126_132370665	0.0112159	494	132301616	132496995	4.9875	5.17269	5.6819	6.70452	12.0391	12.3841	0.00768801	0.00768958	0.00843787	0.526791	1.7723e-05	4.92884e-05	0.0112159	0.988714
UC_deLange_2017	chr5	132397705	rs11739135	LCL	ATAC_chr5_132429688_132432091	0.99852	494	132301616	132496995	4.9875	8.34109	5.6819	26.7859	34.7069	32.4297	0.00758295	0.00758308	0.533527	0.00768358	3.5209e-15	5.15223e-06	0.99852	0.00147498
UC_deLange_2017	chr5	150943866	rs17800987	LCL	ATAC_chr5_150845690_150847801	0.992058	564	150843953	151043204	4.96809	5.27453	6.14779	7.13247	13.9355	13.2744	0.00765019	0.00765635	0.52894	0.00817891	5.95173e-06	1.59454e-05	0.992058	0.00791977
UC_deLange_2017	chr5	177363161	rs67111717	LCL	ATAC_chr5_177370560_177371068	0.996707	163	177264278	177462529	5.52047	10.3023	8.96168	44.6642	55.0538	53.5605	0.00761683	0.00761174	0.532283	0.00782865	1.36979e-22	4.38296e-07	0.996707	0.00329289
UC_deLange_2017	chr6	14724751	rs9367849	LCL	ATAC_chr6_14719002_14719497	0.998307	319	14624755	14823737	5.15238	4.76872	7.00596	5.58106	14.6898	12.5423	0.00758772	0.00759192	0.533345	0.00770468	6.53588e-06	1.57296e-06	0.998307	0.00168407
UC_deLange_2017	chr6	137638098	rs6933404	LCL	ATAC_chr6_137680803_137681284	0.999806	566	137538105	137733312	7.90426	6.03271	23.517	10.578	38.2359	33.9453	0.00757687	0.00757192	0.534416	0.00758345	5.7436e-09	1.37903e-14	0.999806	0.000194314
UC_deLange_2017	chr7	2749278	rs798506	LCL	ATAC_chr7_2734198_2737162	0.996711	530	2649377	2848423	6.73743	5.42793	15.0693	7.59603	24.1493	22.6544	0.00761174	0.00761683	0.532283	0.00782865	1.62378e-06	9.23043e-10	0.996711	0.00328761
UC_deLange_2017	chr7	2749278	rs798506	LCL	ATAC_chr7_2772694_2773697	0.995335	530	2649377	2848423	6.73743	8.62984	15.0693	29.3394	45.5568	44.3991	0.00761601	0.00760972	0.531302	0.00792472	8.19941e-16	1.29073e-09	0.995335	0.0046648
UC_deLange_2017	chr7	2749278	rs798506	LCL	ATAC_chr7_2799784_2800529	0.00639884	530	2649377	2848423	6.73743	5.66885	15.0693	10.1128	24.3223	25.1809	0.00763335	0.00763003	0.00805818	0.530262	5.80808e-07	4.08569e-09	0.00639884	0.993601
UC_deLange_2017	chr7	2749278	rs798506	LCL	ATAC_chr7_2801133_2801673	0.996119	530	2649377	2848423	6.73743	6.561	15.0693	14.3917	30.783	29.4497	0.00761198	0.00760939	0.53184	0.00785982	2.13628e-09	1.08451e-09	0.996119	0.00388061
UC_deLange_2017	chr7	2749278	rs798506	LCL	ATAC_chr7_2820883_2822883	0.995059	530	2649377	2848423	6.73743	6.29239	15.0693	13.9165	30.0797	28.9771	0.0076201	0.00761606	0.53114	0.00794398	4.3217e-09	1.36389e-09	0.995059	0.00494121
UC_deLange_2017	chr7	2749278	rs798506	LCL	ATAC_chr7_2823963_2825547	0.994908	530	2649377	2848423	6.73743	4.12151	15.0693	2.7956	18.9866	17.8573	0.00764187	0.00762127	0.53099	0.0079361	0.000284851	1.32755e-09	0.994908	0.0048068
UC_deLange_2017	chr7	2749278	rs798506	LCL	ATAC_chr7_2838864_2839669	0.00960968	530	2649377	2848423	6.73743	12.0276	15.0693	62.3069	76.89	77.3737	0.00766433	0.00765946	0.00830873	0.527917	1.25681e-29	4.11195e-09	0.00960968	0.99039
UC_deLange_2017	chr7	73748107	rs11981405	LCL	ATAC_chr7_73734602_73735404	0.998348	320	73649185	73847487	5.23464	7.40675	7.68166	18.7085	28.5132	26.3464	0.00759058	0.00759461	0.533402	0.00770051	1.27486e-11	7.84473e-07	0.998348	0.00165074
UC_deLange_2017	chr7	128933913	rs4728142	LCL	ATAC_chr7_128953895_128954527	3.80524e-05	299	128835777	129033838	6.29747	8.21542	11.4856	26.1843	31.7492	37.6699	0.00757634	0.0075745	0.00758076	0.53457	6.02241e-14	1.45611e-07	3.80524e-05	0.999962
UC_deLange_2017	chr9	114817177	rs10817678	LCL	ATAC_chr9_114805662_114807160	0.998997	303	114717229	114917090	7.83529	6.05694	23.2966	10.7907	36.689	34.0308	0.00758756	0.00758878	0.533902	0.00765041	2.16738e-08	8.03118e-14	0.998997	0.00100309
UC_deLange_2017	chr9	136378050	rs3812565	LCL	ATAC_chr9_136372421_136374081	0.0140207	337	136324456	136478000	8.34375	5.15069	27.8348	6.79082	34.4728	34.6224	0.00770878	0.00771159	0.0086654	0.524714	1.63348e-05	1.18575e-14	0.0140207	0.985963
UC_deLange_2017	chr10	26890667	rs7911117	LCL	ATAC_chr10_26891808_26893198	0.99905	516	26791265	26990190	5.61506	4.74704	8.4727	4.72725	15.8761	13.1545	0.00758253	0.00758307	0.533833	0.00764543	8.64441e-06	2.04239e-07	0.99905	0.000941035
UC_deLange_2017	chr10	62685804	rs10761659	LCL	ATAC_chr10_62687270_62687639	0.999717	376	62586742	62785630	7.975	4.41937	22.8081	1.84692	28.5538	24.4652	0.0075808	0.00757393	0.534438	0.00759527	4.53273e-05	3.56991e-14	0.999717	0.000238156
UC_deLange_2017	chr10	99533711	rs7911680	LCL	ATAC_chr10_99532339_99533427	0.989012	523	99433966	99632964	9.59119	4.8581	38.6087	5.6925	44.6642	44.2979	0.00768254	0.00769186	0.526965	0.00841833	3.38121e-05	1.71503e-19	0.989012	0.0109537
UC_deLange_2017	chr10	99533711	rs7911680	LCL	ATAC_chr10_99555509_99556783	0.00813934	523	99433966	99632964	9.59119	8.14593	38.6087	24.3831	62.3548	62.9905	0.0076484	0.0076511	0.00819455	0.528857	3.6968e-13	2.45392e-19	0.00813934	0.991861
UC_deLange_2017	chr11	96298708	rs1786707	LCL	ATAC_chr11_96284822_96285900	0.998853	388	96199154	96397001	4.98286	4.41866	5.73288	3.79722	12.0346	9.47992	0.00758318	0.00758432	0.533842	0.00765261	2.601e-05	3.75453e-06	0.998853	0.0011128
UC_deLange_2017	chr11	96298708	rs1786707	LCL	ATAC_chr11_96292399_96294918	0.998276	388	96199154	96397001	4.98286	6.71654	5.73288	15.2916	23.1131	20.9863	0.00758914	0.00759165	0.533355	0.00769939	4.02082e-10	5.69826e-06	0.998276	0.00171806
UC_deLange_2017	chr16	28478021	rs28374519	LCL	ATAC_chr16_28426089_28426622	0.00715534	135	28462144	28577122	5.36782	5.9739	8.32385	13.1059	20.6691	21.4233	0.00763827	0.0076425	0.00811599	0.529707	2.92956e-08	3.49818e-06	0.00715534	0.992841
UC_deLange_2017	chr16	30482560	rs11150590	LCL	ATAC_chr16_30469625_30474507	0.998603	172	30383220	30581738	4.96023	4.22485	6.23189	2.844	11.4151	9.01674	0.00759377	0.00758913	0.533574	0.00767797	7.97266e-05	2.69151e-06	0.998603	0.00130568
UC_deLange_2017	chr17	39887396	rs12936409	LCL	ATAC_chr17_39920149_39921796	0.997628	279	39793671	39987295	8.63924	6.77627	31.0746	16.9336	49.7886	47.9784	0.00759331	0.00759932	0.53299	0.00774687	1.05994e-10	7.66132e-17	0.997628	0.00237247
UC_deLange_2017	chr17	42362183	rs744166	LCL	ATAC_chr17_42363874_42364172	0.995931	344	42266197	42461423	6.52174	4.75526	14.4526	5.56808	21.2969	20.0051	0.00761475	0.00760674	0.531739	0.00787758	1.51966e-05	2.10267e-09	0.995931	0.00405408
UC_deLange_2017	chr19	33263138	rs10408351	LCL	ATAC_chr19_33260755_33261277	0.00414817	524	33163189	33362663	7.58824	8.65658	19.5456	27.8689	46.1434	47.4135	0.00761594	0.00760983	0.00788647	0.531622	1.12571e-14	4.63294e-11	0.00414817	0.995852
UC_deLange_2017	chr22	29857267	rs4993442	LCL	ATAC_chr22_29797249_29797696	0.0148557	358	29757666	29957105	5.51955	15.4557	9.5438	111.209	120.645	120.746	0.00771656	0.00772165	0.00874055	0.524133	7.36082e-51	1.04649e-06	0.0148557	0.985143
UC_deLange_2017	chr22	29857267	rs4993442	LCL	ATAC_chr22_29798158_29798801	0.996345	358	29757666	29957105	5.51955	10.1064	9.5438	44.918	55.8283	54.4377	0.00760924	0.00761267	0.532067	0.00784118	1.12897e-22	2.60431e-07	0.996345	0.0036549
UC_deLange_2017	chr22	29857267	rs4993442	LCL	ATAC_chr22_29938052_29938759	0.997502	358	29757666	29957105	5.51955	4.10142	9.5438	3.85879	15.1618	13.3816	0.00759958	0.00758987	0.532935	0.00774893	5.16619e-05	1.75246e-07	0.997502	0.00244548
UC_deLange_2017	chr22	30065753	rs12171061	LCL	ATAC_chr22_30078766_30079303	0.995728	283	29965892	30163691	5.50562	5.31135	9.67082	8.26381	19.1536	17.9122	0.00761281	0.00761683	0.531608	0.00789079	1.08581e-06	2.66029e-07	0.995728	0.00427074
UC_deLange_2017	chr22	39266475	rs9611131	LCL	ATAC_chr22_39240660_39242312	0.00663387	602	39167203	39365250	6.5815	4.92456	13.2052	4.7068	17.086	17.9108	0.00764514	0.00764227	0.00807343	0.52979	0.000129625	2.64075e-08	0.00663387	0.993236
UC_deLange_2017	chr22	39266475	rs9611131	LCL	ATAC_chr22_39264339_39265007	0.991814	602	39167203	39365250	6.5815	5.68158	13.2052	8.81196	22.6429	22.0121	0.00765155	0.00765222	0.528815	0.00820062	1.14317e-06	1.41318e-08	0.991814	0.00818519
UC_deLange_2017	chr22	39266475	rs9611131	LCL	ATAC_chr22_39266207_39267219	0.99922	602	39167203	39365250	6.5815	4.96116	13.2052	3.94973	20.0427	17.1157	0.00758386	0.00758132	0.533978	0.00763489	1.52243e-05	1.4548e-09	0.99922	0.000765177
UC_deLange_2017	chr22	39266475	rs9611131	LCL	ATAC_chr22_39286928_39287695	0.993203	602	39167203	39365250	6.5815	4.57337	13.2052	2.60855	16.675	15.8083	0.00767616	0.00763644	0.529722	0.00805672	0.000447907	1.11398e-08	0.993203	0.0063491

## Sheet: Table B
Table B. Colocalization results of GEUVADIS eQTLs and IMD GWAS
PPA_3: posterior probability of colocalization
IMD	CHR	BP	ID	Celltype	Gene	Coloc_p	NSNP	start	end	max_abs_Z_IMD	max_abs_Z_RNA	logBF_1	logBF_2	logBF_3	logBF_4	pi_1	pi_2	pi_3	pi_4	PPA_1	PPA_2	PPA_3	PPA_4
CD_deLange_2017	chr1	8090578	rs72634258	LCL	ENSG00000284747	0.995052	357	7991181	8189495	5.32877	8.8657	8.82501	31.4022	41.3151	40.2137	0.00761606	0.0076201	0.53114	0.00794398	1.1069e-16	7.07128e-07	0.995052	0.00494722
CD_deLange_2017	chr1	8090578	rs72634258	LCL	PARK7	0.996456	357	7991181	8189495	5.32877	4.89769	8.82501	7.05534	17.2932	15.8709	0.00761318	0.0076132	0.532067	0.0078391	2.99496e-06	5.10306e-07	0.996456	0.00354064
CD_deLange_2017	chr1	154420198	rs35402075	LCL	IL6R	0.999043	423	154320506	154520057	4.98616	8.44887	5.68871	28.489	36.8323	34.1237	0.00758307	0.00758253	0.533833	0.00764543	4.23177e-16	3.37702e-06	0.999043	0.000953338
CD_deLange_2017	chr1	155349877	rs12131079	LCL	SCAMP3	0.00449429	110	155250077	155446537	6.25287	4.39802	12.6289	5.71435	17.1472	18.3409	0.00761691	0.00762232	0.00791499	0.531384	4.71745e-05	4.68889e-08	0.00449429	0.995458
CD_deLange_2017	chr1	155780535	rs2948072	LCL	ARHGEF2	0.996642	91	155682290	155879929	5.75	4.27775	11.3874	4.88346	17.7136	16.2333	0.00760904	0.00760723	0.532329	0.00782212	2.54842e-05	3.81534e-08	0.996642	0.00333262
CD_deLange_2017	chr1	155780535	rs2948072	LCL	FDPS	0.98725	91	155682290	155879929	5.75	5.14595	11.3874	7.56925	19.176	18.9436	0.00769411	0.00769397	0.525754	0.00856173	5.98789e-06	1.3154e-07	0.98725	0.0127434
CD_deLange_2017	chr1	155780535	rs2948072	LCL	RUSC1-AS1	0.988475	91	155682290	155879929	5.75	5.4441	11.3874	9.90334	21.5997	21.2788	0.00768125	0.00768325	0.526522	0.00846113	5.29473e-07	1.2007e-07	0.988475	0.0115246
CD_deLange_2017	chr1	155780535	rs2948072	LCL	YY1AP1	0.995827	91	155682290	155879929	5.75	6.33208	11.3874	13.982	26.5913	25.3277	0.00761321	0.00761911	0.531627	0.00788299	3.55776e-09	4.76797e-08	0.995827	0.00417327
CD_deLange_2017	chr1	155981711	rs1889532	LCL	RIT1	0.988884	186	155882332	156080086	5.3956	5.57655	8.56382	9.79971	18.7113	18.3574	0.00768334	0.00767991	0.526877	0.008436	5.64931e-07	1.94332e-06	0.988884	0.0111138
CD_deLange_2017	chr2	24938367	rs4343432	LCL	ADCY3	0.0021943	468	24839184	25037759	6.9321	8.97865	16.6506	33.7926	48.5551	50.4428	0.00759196	0.00759582	0.00774093	0.532971	2.99857e-17	8.35285e-10	0.0021943	0.997806
CD_deLange_2017	chr2	27508073	rs1260326	LCL	GTF3C2	0.994716	200	27408324	27607200	6.54037	5.43234	14.1139	8.68069	23.8221	22.7828	0.00762252	0.00762649	0.53093	0.00797208	8.68047e-07	3.79442e-09	0.994716	0.00528266
CD_deLange_2017	chr2	43273665	rs6736400	LCL	ENSG00000234936	0.995758	327	43174816	43373582	6.10427	4.65519	12.583	4.42831	18.2577	16.998	0.00761394	0.00761468	0.531701	0.00789106	4.89362e-05	1.40645e-08	0.995758	0.00419323
CD_deLange_2017	chr2	43624107	rs55946629	LCL	THADA	0.988008	577	43524341	43723984	7.5974	4.16946	19.6334	3.76545	23.7013	23.3966	0.00770127	0.00769198	0.526129	0.00848242	0.000247479	3.17435e-11	0.988008	0.0117448
CD_deLange_2017	chr2	206087841	rs13408358	LCL	NDUFS1	0.9918	334	205987888	206187455	5.1236	10.8011	5.76648	52.4212	58.8129	58.1811	0.00764962	0.00765256	0.528809	0.00819955	1.31523e-25	2.40457e-05	0.9918	0.00817618
CD_deLange_2017	chr2	230230963	rs7563433	LCL	SP110	0.994602	641	230131107	230330373	7.62814	7.85086	21.8223	23.2237	46.06	45.0408	0.00762308	0.00762383	0.530787	0.00798206	4.25165e-13	1.72661e-12	0.994602	0.00539782
CD_deLange_2017	chr2	230230963	rs7563433	LCL	SP140	0.989719	641	230131107	230330373	7.62814	17.9242	21.8223	151.628	173.87	173.446	0.00766986	0.00766894	0.527345	0.00836724	1.33326e-68	3.15165e-12	0.989719	0.0102814
CD_deLange_2017	chr2	233478157	rs745155	LCL	DGKD	0.999999	292	233378185	233577817	6.83696	13.9643	14.8007	88.0788	108.174	98.6863	0.00756962	0.00757645	0.534567	0.00757544	3.97549e-43	2.65507e-11	0.999999	1.07348e-06
CD_deLange_2017	chr3	48720340	rs61137521	LCL	SLC26A6	0.00600862	156	48621034	48815206	5.34322	6.05143	9.62998	13.6057	22.3146	23.2326	0.00763168	0.00762886	0.00802951	0.530451	1.76944e-08	9.42581e-07	0.00600862	0.99399
CD_deLange_2017	chr3	49660026	rs9836291	LCL	APEH	0.998409	204	49560304	49756914	10.1294	6.7531	45.1404	17.627	64.9294	62.7268	0.00759157	0.00758882	0.533382	0.00768926	3.61707e-11	4.0671e-23	0.998409	0.00159063
CD_deLange_2017	chr3	49660026	rs9836291	LCL	PRKAR2A	0.998134	204	49560304	49756914	10.1294	4.94676	45.1404	6.42382	53.577	51.5295	0.00759064	0.00759511	0.533316	0.00771442	3.07984e-06	4.72465e-23	0.998134	0.00186338
CD_deLange_2017	chr3	49876272	rs36022378	LCL	UBA7	0.997971	224	49776393	49976036	7.39205	5.53593	20.5771	9.88459	32.3962	30.4334	0.00759552	0.00759211	0.53325	0.00771942	1.04667e-07	2.37627e-12	0.997971	0.00202935
CD_deLange_2017	chr3	50136751	rs7428430	LCL	RBM6	0.0130248	219	50036944	50236023	5.3	16.4096	7.05268	127.704	134.537	134.751	0.007694	0.00769223	0.00858875	0.525528	5.02704e-58	1.25752e-05	0.0130248	0.986963
CD_deLange_2017	chr3	53099133	rs2581828	LCL	RFT1	0.98645	355	53004287	53199027	5.80864	6.55987	10.1321	15.9968	26.3047	26.1248	0.00770878	0.0077027	0.525107	0.008634	1.3714e-09	4.8285e-07	0.98645	0.0135499
CD_deLange_2017	chr3	53099133	rs2581828	LCL	SFMBT1	0.998898	355	53004287	53199027	5.80864	4.79957	10.1321	5.55155	18.2117	15.6431	0.00758172	0.00758372	0.53372	0.00765469	4.39603e-06	4.50669e-08	0.998898	0.001098
CD_deLange_2017	chr3	101269134	rs348869	LCL	SENP7	0.997296	375	101170308	101368743	5.04375	9.98887	6.56476	41.9975	50.2278	48.5447	0.00759093	0.00760413	0.532684	0.00776267	1.54886e-21	3.7932e-06	0.997296	0.00270025
CD_deLange_2017	chr5	10682118	rs7715399	LCL	DAP	7.9852e-06	589	10582465	10781518	5.27711	14.1343	6.86199	89.1288	88.5098	95.9908	0.0075756	0.00757864	0.00757309	0.534604	2.77485e-41	1.48398e-05	7.9852e-06	0.999977
CD_deLange_2017	chr5	40411189	rs6451494	LCL	PTGER4	0.000456553	512	40311466	40510564	15.7636	10.5467	115.537	46.243	158.34	161.78	0.00757948	0.00757626	0.00761237	0.534262	1.17115e-22	9.42731e-53	0.000456553	0.999543
CD_deLange_2017	chr5	96912106	rs6873866	LCL	ERAP2	0.984467	543	96812663	97012071	8.0122	59.0925	24.6722	1734.19	1758.92	1758.86	0.00772283	0.00772299	0.523621	0.00879767	0	2.63949e-13	0.984467	0.0155326
CD_deLange_2017	chr5	142146492	rs181826	LCL	NDFIP1	0.997498	541	142046614	142246069	6.95808	8.15433	18.4904	26.601	46.8356	45.0771	0.00758675	0.00760763	0.532859	0.00775822	6.95329e-15	2.32153e-11	0.997498	0.00250245
CD_deLange_2017	chr6	167019278	rs35171809	LCL	CEP43	0.0128522	521	166919663	167119267	9.84906	5.87336	40.8039	10.3099	50.887	51.1124	0.00769816	0.00769429	0.00857378	0.525644	4.82125e-07	2.7513e-20	0.0128522	0.987147
CD_deLange_2017	chr6	167019278	rs35171809	LCL	ENSG00000227598	0.0087563	521	166919663	167119267	9.84906	5.08896	40.8039	8.87429	49.1077	49.6771	0.00765998	0.0076629	0.00824857	0.528359	2.0133e-06	2.73657e-20	0.0087563	0.991242
CD_deLange_2017	chr6	167019278	rs35171809	LCL	RNASET2	0.000243941	521	166919663	167119267	9.84906	9.1772	40.8039	33.2172	69.9564	74.0211	0.0075753	0.0075772	0.00759553	0.534433	5.31322e-17	2.69526e-20	0.000243941	0.999756
CD_deLange_2017	chr7	74878823	rs2529275	LCL	GTF2IRD2	0.0101241	25	74782019	74954591	5.208	4.74064	8.21845	6.68476	14.4312	14.8686	0.00767191	0.00767807	0.00835453	0.52745	1.86284e-05	4.02208e-06	0.0101241	0.989853
CD_deLange_2017	chr7	74878823	rs2529275	LCL	SPDYE12	0.997917	25	74782019	74954591	5.208	4.16387	8.21845	3.92675	13.8163	11.8515	0.00759384	0.00759668	0.533104	0.00773028	5.26756e-05	7.20958e-07	0.997917	0.00202832
CD_deLange_2017	chr8	89787733	rs36032938	LCL	RIPK2	0.995318	386	89687740	89886531	5.22896	4.38514	6.71937	3.42241	11.322	10.1347	0.00763164	0.00762518	0.531284	0.00791445	0.000143341	5.29845e-06	0.995318	0.00452308
CD_deLange_2017	chr9	136372044	rs4077515	LCL	CARD9	0.000813564	340	136272066	136471068	11.4074	8.94319	57.5799	31.8432	86.5575	89.4229	0.0075843	0.00758309	0.00763409	0.534056	2.10253e-16	1.3975e-27	0.000813564	0.999186
CD_deLange_2017	chr10	30516551	rs2002695	LCL	MAP3K8	0.995922	579	30417306	30616427	6.84127	5.80011	15.5653	9.9236	26.7698	25.4833	0.00761502	0.00761673	0.531703	0.00788222	1.9416e-07	6.888e-10	0.995922	0.00407818
CD_deLange_2017	chr10	35207698	rs1148246	LCL	CREM	0.993777	359	35109136	35302860	7.92216	10.4825	25.3051	48.9683	75.1492	74.2647	0.00763115	0.00764425	0.530343	0.00804163	3.22347e-24	6.10746e-14	0.993777	0.00622257
CD_deLange_2017	chr10	35207698	rs1148246	LCL	CUL2	0.985686	359	35109136	35302860	7.92216	4.60482	25.3051	6.06249	31.4994	31.365	0.00771871	0.00770892	0.524485	0.00869345	2.96088e-05	1.29988e-13	0.985686	0.0142845
CD_deLange_2017	chr10	58248458	rs2590330	LCL	CISD1	0.992396	485	58148840	58347864	5.13636	4.00705	7.98633	4.1993	12.8935	12.1821	0.00765219	0.00764623	0.52935	0.00814162	0.00010606	2.40174e-06	0.992396	0.00749354
CD_deLange_2017	chr10	79282718	rs1250573	LCL	ZMIZ1	0.00514389	409	79182863	79382609	8.50279	4.96183	27.4333	4.76294	31.1304	32.1956	0.00763539	0.00762277	0.00796481	0.530856	0.00012228	1.74182e-14	0.00514389	0.994734
CD_deLange_2017	chr11	61790331	rs102275	LCL	FADS2	0.997869	340	61690385	61890194	5.15663	10.3781	7.2642	46.0532	55.2025	53.2864	0.00759733	0.0075888	0.533136	0.00772929	2.15551e-23	1.50984e-06	0.997869	0.0021292
CD_deLange_2017	chr11	61790331	rs102275	LCL	TMEM258	0.00927669	340	61690385	61890194	5.15663	9.63074	7.2642	38.165	44.9107	45.4268	0.00766566	0.00766899	0.00828468	0.528066	3.83712e-19	1.00977e-05	0.00927669	0.990713
CD_deLange_2017	chr11	64341646	rs647152	LCL	CCDC88B	0.99358	262	64242407	64440421	5.10778	7.70183	7.41003	22.8429	31.102	30.2454	0.00764327	0.00763599	0.53003	0.00806093	7.35994e-13	3.70565e-06	0.99358	0.00641599
CD_deLange_2017	chr11	64341646	rs647152	LCL	ENSG00000236935	0.0039987	262	64242407	64440421	5.10778	22.1474	7.41003	235.006	241.108	242.413	0.00760768	0.00761323	0.00787277	0.531887	1.23921e-104	8.65015e-06	0.0039987	0.995993
CD_deLange_2017	chr12	111634620	rs11065987	LCL	SH2B3	0.998457	119	111535336	111731848	5.36364	4.45986	7.47712	3.01317	12.7063	10.4211	0.00758913	0.00758272	0.533581	0.0076853	7.60911e-05	8.75582e-07	0.998457	0.0014634
CD_deLange_2017	chr16	28483100	rs42861	LCL	TUFM	0.993547	146	28462144	28582276	7.44311	4.69735	21.4471	5.75448	28.0425	27.1889	0.00763702	0.00763125	0.530099	0.00806034	1.95612e-05	2.99122e-12	0.993547	0.00643353
CD_deLange_2017	chr16	28860532	rs11859512	LCL	EIF3C	0.0154224	160	28811498	28959531	7.23494	4.73934	20.7097	6.44209	27.0765	27.1453	0.00772788	0.00772474	0.00878961	0.523776	2.3292e-05	1.4814e-11	0.0154224	0.984554
CD_deLange_2017	chr16	85984057	rs17445836	LCL	ENSG00000269667	0.999528	746	85884217	86084012	5.20874	5.1957	5.57342	5.45489	14.3922	10.9749	0.00757626	0.00757948	0.534262	0.00761237	2.09686e-06	1.86328e-06	0.999528	0.000467156
CD_deLange_2017	chr16	85984057	rs17445836	LCL	IRF8	0.999379	746	85884217	86084012	5.20874	7.63634	5.57342	20.6026	29.2758	26.1378	0.00758214	0.00757966	0.534155	0.00762262	7.21196e-13	2.4266e-06	0.999379	0.000618559
CD_deLange_2017	chr17	39887396	rs12936409	LCL	GRB7	0.998041	276	39793671	39987295	8.93082	4.38472	33.7237	5.10421	40.8043	38.8009	0.00759615	0.00758939	0.533284	0.00771381	1.19601e-05	4.44673e-18	0.998041	0.00194711
CD_deLange_2017	chr17	39887396	rs12936409	LCL	GSDMB	5.47121e-05	276	39793671	39987295	8.93082	14.6134	33.7237	99.8878	128.054	133.611	0.00757296	0.00757387	0.00758168	0.534583	5.89569e-46	3.20073e-17	5.47121e-05	0.999945
CD_deLange_2017	chr17	39887396	rs12936409	LCL	IKZF3	0.998417	276	39793671	39987295	8.93082	5.9779	33.7237	11.7244	47.6265	45.4192	0.00759157	0.00758882	0.533382	0.00768926	1.30233e-08	3.63393e-18	0.998417	0.0015832
CD_deLange_2017	chr17	39887396	rs12936409	LCL	ORMDL3	8.75056e-06	276	39793671	39987295	8.93082	27.2542	33.7237	361.653	387.987	395.377	0.00756962	0.00757645	0.00757544	0.534567	1.22222e-159	3.20202e-17	8.75056e-06	0.999991
CD_deLange_2017	chr17	39887396	rs12936409	LCL	ZPBP2	0.997093	276	39793671	39987295	8.93082	4.53335	33.7237	5.32115	40.6425	39.0257	0.00760338	0.00760121	0.532602	0.00778367	1.40789e-05	6.5066e-18	0.997093	0.00289304
CD_deLange_2017	chr17	42579643	rs78345139	LCL	PLEKHH3	0.00951852	214	42481341	42672816	5.85792	5.2497	10.1929	5.85226	15.5501	16.0428	0.00767032	0.0076648	0.00830434	0.527964	4.14432e-05	5.39553e-07	0.00951852	0.990439
CD_deLange_2017	chr19	46383942	rs4803937	LCL	PPP5C	0.999681	634	46284100	46483572	5.09605	5.56894	6.37014	8.90551	19.0169	15.2194	0.00758106	0.0075748	0.534399	0.00759414	4.56345e-08	5.75483e-07	0.999681	0.000318586
CD_deLange_2017	chr20	46006273	rs3761158	LCL	MMP9	0.998646	319	45908293	46106037	6.65455	5.17814	13.9014	7.50916	23.7349	21.3733	0.00758432	0.0075786	0.533655	0.00767272	7.61035e-07	1.27343e-09	0.998646	0.00135349
CD_deLange_2017	chr20	63697746	rs6062496	LCL	ARFRP1	0.99853	586	63597891	63796751	7.32335	4.60272	19.7967	5.04374	27.1125	24.8264	0.00758921	0.00758349	0.533557	0.00767715	9.44449e-06	3.69582e-12	0.99853	0.00146068
CD_deLange_2017	chr22	21561877	rs5754100	LCL	CCDC116	0.0166642	132	21465221	21660953	8.18932	4.6934	28.1534	7.10007	35.2422	35.2455	0.00773232	0.00773135	0.0088922	0.522992	1.20906e-05	8.69088e-15	0.0166642	0.983324
IBD_deLange_2017	chr1	1790040	rs2272908	LCL	TMEM52	0.996027	262	1694167	1888667	5.248	4.42025	7.84043	4.77012	13.9128	12.5933	0.00761697	0.00761137	0.531741	0.00786481	3.28984e-05	1.52558e-06	0.996027	0.00393758
IBD_deLange_2017	chr1	8108201	rs10746475	LCL	ENSG00000284747	0.996135	364	8008484	8208035	7.97561	8.71546	25.3966	31.0555	57.7744	56.4371	0.00761398	0.00761479	0.531888	0.00785922	1.23762e-16	3.55039e-14	0.996135	0.00386453
IBD_deLange_2017	chr1	8108201	rs10746475	LCL	PARK7	0.996852	364	8008484	8208035	7.97561	4.89769	25.3966	6.92387	33.8462	32.3097	0.00760188	0.00759833	0.532388	0.00780686	3.04587e-06	2.89014e-14	0.996852	0.00314492
IBD_deLange_2017	chr1	46356475	rs112124254	LCL	LURAP1	0.989219	386	46256717	46456330	5.00613	4.5624	3.99908	6.12484	10.5178	10.1192	0.00768179	0.00769532	0.527072	0.008381	2.12727e-05	0.000178564	0.989219	0.0105579
IBD_deLange_2017	chr1	46356475	rs112124254	LCL	NSUN4	5.96757e-05	386	46256717	46456330	5.00613	26.7929	3.99908	348.078	346.607	352.077	0.00757763	0.0075949	0.00757701	0.534334	9.61714e-154	0.000260498	5.96757e-05	0.99968
IBD_deLange_2017	chr1	150925201	rs72704682	LCL	CTSS	0.995915	241	150825272	151023905	5.28462	17.3912	8.33302	144.555	154.144	152.86	0.00760962	0.00761246	0.531812	0.00787664	6.74176e-66	9.76243e-07	0.995915	0.00408384
IBD_deLange_2017	chr1	150925201	rs72704682	LCL	HORMAD1	0.9933	241	150825272	151023905	5.28462	4.07287	8.33302	4.42951	13.5801	12.7514	0.00766479	0.00764127	0.529739	0.00808743	7.56394e-05	1.52104e-06	0.9933	0.00662138
IBD_deLange_2017	chr1	155194689	rs12411216	LCL	SCAMP3	0.0048608	240	155094807	155292822	6.5873	4.4204	14.3457	5.39551	18.621	19.7401	0.00762589	0.00762375	0.00794342	0.531067	6.48998e-05	8.41626e-09	0.0048608	0.995074
IBD_deLange_2017	chr1	155194689	rs12411216	LCL	THBS3	0.997339	240	155094807	155292822	6.5873	6.57959	14.3457	14.2875	30.3028	28.6054	0.00760536	0.00758845	0.532851	0.00776297	1.67202e-09	1.57402e-09	0.997339	0.00266114
IBD_deLange_2017	chr1	155464151	rs12724079	LCL	RUSC1-AS1	0.989475	67	155364745	155557222	5.38346	5.56561	9.63076	11.8397	21.8537	21.4526	0.00767287	0.0076804	0.527255	0.00837468	7.07937e-08	6.45286e-07	0.989475	0.0105241
IBD_deLange_2017	chr1	155780574	rs2948071	LCL	ARHGEF2	0.9971	91	155682290	155879929	5.41985	4.27775	9.14508	4.88346	15.6087	13.9865	0.00760338	0.00760121	0.532602	0.00778367	2.21933e-05	3.12822e-07	0.9971	0.00287729
IBD_deLange_2017	chr1	155780574	rs2948071	LCL	FDPS	0.0159492	91	155682290	155879929	5.41985	5.14595	9.14508	7.56925	16.6635	16.7045	0.00772419	0.00772718	0.00883823	0.523405	7.56855e-06	1.56605e-06	0.0159492	0.984042
IBD_deLange_2017	chr1	155780574	rs2948071	LCL	RIT1	0.996052	91	155682290	155879929	5.41985	5.47568	9.14508	9.79437	20.2263	18.9083	0.00761091	0.00761398	0.531858	0.00787336	2.19499e-07	4.20327e-07	0.996052	0.00394696
IBD_deLange_2017	chr1	155780574	rs2948071	LCL	YY1AP1	0.994916	91	155682290	155879929	5.41985	6.33208	9.14508	13.982	24.1685	23.0919	0.00762749	0.0076257	0.530999	0.0079607	4.27077e-09	5.3834e-07	0.994916	0.00508296
IBD_deLange_2017	chr2	24972708	rs76286777	LCL	ADCY3	0.00291809	429	24873637	25071549	6.59603	8.97865	15.1466	33.862	47.3982	49.008	0.0076021	0.00760182	0.00779349	0.532444	2.80285e-17	3.76316e-09	0.00291809	0.997082
IBD_deLange_2017	chr2	27508073	rs1260326	LCL	GTF3C2	0.994446	200	27408324	27607200	5.352	5.43234	7.31814	8.68069	16.9802	15.9879	0.0076261	0.007628	0.530663	0.00798875	9.09637e-07	3.55403e-06	0.994446	0.00554961
IBD_deLange_2017	chr2	43224818	rs149290349	LCL	ENSG00000234936	0.0144808	366	43125749	43324277	6.55365	4.65519	13.7783	4.24335	17.8952	18.0184	0.00772444	0.0077126	0.00871536	0.524271	0.000209131	1.50929e-08	0.0144808	0.98531
IBD_deLange_2017	chr2	43624107	rs55946629	LCL	THADA	0.0125233	577	43524341	43723984	7.21111	4.16946	16.7326	3.76545	20.2484	20.4968	0.00771609	0.00770119	0.00854654	0.525551	0.000336053	7.83444e-10	0.0125233	0.987141
IBD_deLange_2017	chr2	61210352	rs12998475	LCL	C2orf74-DT	0.00832073	324	61111052	61310079	6.12598	7.52541	12.4574	22.4601	34.2993	34.9145	0.00765452	0.00764906	0.00820691	0.528704	2.53543e-12	5.59568e-08	0.00832073	0.991679
IBD_deLange_2017	chr2	101997084	rs13022757	LCL	IL1R2	0.999589	420	101897762	102096596	6.20161	7.96197	11.4555	24.26	39.1396	35.5966	0.00757942	0.00757427	0.534307	0.00760347	1.34465e-14	4.88886e-09	0.999589	0.000411434
IBD_deLange_2017	chr2	218181399	rs62183956	LCL	ENSG00000261338	0.000504541	202	218082398	218279775	6.24	10.1096	13.803	44.9368	55.3988	58.7395	0.00758202	0.00757947	0.00761468	0.534215	4.32719e-22	1.43637e-08	0.000504541	0.999495
IBD_deLange_2017	chr2	218181399	rs62183956	LCL	TMBIM1	0.000353141	202	218082398	218279775	6.24	16.6635	13.803	131.875	141.982	145.678	0.00757993	0.00757943	0.00760528	0.534328	7.57125e-60	1.43612e-08	0.000353141	0.999647
IBD_deLange_2017	chr3	49075651	rs34660653	LCL	SLC26A6	0.996193	112	48975943	49175597	7.32292	5.53058	20.7984	10.5384	32.651	31.2989	0.00760586	0.00761654	0.531954	0.00785887	1.01415e-07	3.55512e-12	0.996193	0.00380716
IBD_deLange_2017	chr3	49676792	rs1131095	LCL	APEH	0.998703	215	49578191	49776393	12.4809	6.7531	71.2077	17.573	91.1372	88.7336	0.00759304	0.00758337	0.533637	0.00766913	3.1429e-11	1.59789e-34	0.998703	0.0012974
IBD_deLange_2017	chr3	49676792	rs1131095	LCL	PRKAR2A	0.998469	215	49578191	49776393	12.4809	4.94676	71.2077	6.3329	79.7436	77.501	0.00758802	0.00759081	0.533544	0.00769151	2.78721e-06	1.86457e-34	0.998469	0.00152833
IBD_deLange_2017	chr3	49921715	rs35275715	LCL	UBA7	0.996212	241	49823245	50021177	7.70161	5.45685	22.9109	9.18074	33.4349	32.0778	0.00761027	0.00760724	0.531912	0.00785601	3.83153e-07	4.17138e-13	0.996212	0.00378719
IBD_deLange_2017	chr3	50127668	rs2624848	LCL	RBM6	0.00162018	232	50027841	50223036	6.504	16.4096	15.0669	127.909	140.791	142.975	0.00758396	0.00759194	0.00769248	0.533533	4.00169e-58	4.06773e-09	0.00162018	0.99838
IBD_deLange_2017	chr3	101304904	rs503734	LCL	SENP7	0.990423	371	101205012	101404499	5.58065	10.2016	8.14351	43.721	52.3463	51.8589	0.00766917	0.00766208	0.527897	0.00830885	9.14113e-22	2.58038e-06	0.990423	0.00957474
IBD_deLange_2017	chr5	10682118	rs7715399	LCL	DAP	4.1352e-05	589	10582465	10781518	5.06977	14.1343	6.19392	89.1288	89.4851	95.3227	0.00757417	0.00757564	0.00758097	0.534546	2.77452e-41	2.89349e-05	4.1352e-05	0.99993
IBD_deLange_2017	chr5	96912106	rs6873866	LCL	ERAP2	0.983891	543	96812663	97012071	7.17969	59.0925	16.7818	1734.19	1751	1750.96	0.00773343	0.00772556	0.52333	0.00884476	0	7.28343e-10	0.983891	0.0161088
IBD_deLange_2017	chr5	142216955	rs2961704	LCL	NDFIP1	0.997844	535	142117014	142315884	6.42731	7.98745	13.9259	26.2421	42.0523	40.1486	0.00759455	0.00759704	0.533164	0.00773157	8.66113e-15	1.93438e-09	0.997844	0.00215626
IBD_deLange_2017	chr5	177371039	rs56235845	LCL	RGS14	0.999519	182	177272267	177469411	6.35507	5.01287	13.0046	6.5645	22.8325	19.4437	0.00757626	0.00757948	0.534262	0.00761237	7.64294e-07	1.22056e-09	0.999519	0.000480634
IBD_deLange_2017	chr6	167019278	rs35171809	LCL	CEP43	0.983345	521	166919663	167119267	8.84553	5.87336	31.5588	10.3099	41.871	41.867	0.00773013	0.00772991	0.522989	0.00889272	4.8292e-07	2.85468e-16	0.983345	0.0166543
IBD_deLange_2017	chr6	167019278	rs35171809	LCL	ENSG00000227598	0.00341196	521	166919663	167119267	8.84553	5.08896	31.5588	8.87429	38.9757	40.4326	0.00760592	0.0076079	0.00782213	0.532238	1.99401e-06	2.80589e-16	0.00341196	0.996586
IBD_deLange_2017	chr7	2750246	rs798502	LCL	AMZ1	0.994409	529	2650532	2849616	5.24818	5.28255	6.98561	8.0006	15.967	14.9801	0.00763015	0.00762428	0.530695	0.00799577	1.79764e-06	4.95645e-06	0.994409	0.00558433
IBD_deLange_2017	chr7	2750246	rs798502	LCL	GNA12	0.0027161	529	2650532	2849616	5.24818	23.765	6.98561	272.136	277.444	279.121	0.0075937	0.00759904	0.00776614	0.532811	9.24152e-121	1.31703e-05	0.0027161	0.997271
IBD_deLange_2017	chr7	74869879	rs2529269	LCL	GTF2IRD2	0.998065	25	74782019	74954591	6.39264	4.74064	14.3373	6.68476	22.6935	20.6833	0.00758288	0.00758733	0.533414	0.00770771	3.3333e-06	1.58367e-09	0.998065	0.00193187
IBD_deLange_2017	chr7	99171402	rs4236540	LCL	SMURF1	0.994038	351	99073405	99264292	5.82734	7.22928	10.2755	20.486	31.6767	30.7522	0.00762863	0.00763552	0.530513	0.00802008	7.2566e-12	1.97447e-07	0.994038	0.00596175
IBD_deLange_2017	chr7	100663304	rs221785	LCL	GIGYF1	0.998378	237	100565492	100762174	4.49701	4.79363	4.27001	6.20485	12.6458	10.4442	0.00759179	0.00759298	0.533338	0.00769326	3.27383e-06	2.26681e-05	0.998378	0.0015931
IBD_deLange_2017	chr7	100663304	rs221785	LCL	TFR2	0.998138	237	100565492	100762174	4.49701	4.19843	4.27001	3.15919	9.52187	7.38496	0.00759851	0.00759405	0.533277	0.00770705	7.44925e-05	2.45151e-05	0.998138	0.00170246
IBD_deLange_2017	chr8	48506001	rs13263338	LCL	LINC02947	0.991855	175	48406519	48602333	5.14685	7.17231	7.55939	19.7123	27.8881	27.2527	0.0076511	0.0076484	0.528857	0.00819455	2.12917e-11	4.03648e-06	0.991855	0.00814125
IBD_deLange_2017	chr9	136374746	rs3829110	LCL	CARD9	0.000626346	337	136274844	136474610	12.592	8.94319	71.8256	31.852	100.552	103.678	0.00758242	0.00757927	0.00762299	0.534146	2.08346e-16	9.08404e-34	0.000626346	0.999374
IBD_deLange_2017	chr9	136374746	rs3829110	LCL	SNAPC4	0.000268442	337	136274844	136474610	12.592	5.03448	71.8256	5.02436	72.8815	76.85	0.0075806	0.00758252	0.00759086	0.534349	9.32586e-05	9.08599e-34	0.000268442	0.999638
IBD_deLange_2017	chr10	30401447	rs10826797	LCL	MAP3K8	0.997189	446	30301492	30501432	7.27941	6.02035	19.4005	12.0586	33.093	31.4486	0.0076045	0.00760479	0.532673	0.00777442	1.60987e-08	1.04294e-11	0.997189	0.0028106
IBD_deLange_2017	chr10	31937527	rs12264039	LCL	KIF5B	0.998826	319	31837730	32037109	5.01389	5.62047	6.33522	9.94839	18.7594	16.2553	0.00758773	0.00758237	0.533771	0.00766248	5.70831e-08	2.11534e-06	0.998826	0.00117223
IBD_deLange_2017	chr10	35066474	rs9299717	LCL	CREM	0.98902	380	34966937	35166408	7.33846	10.5696	20.7503	50.8169	71.927	71.5612	0.00768438	0.00767482	0.526706	0.00842944	8.5805e-25	9.78829e-12	0.98902	0.0109797
IBD_deLange_2017	chr10	35066474	rs9299717	LCL	CUL2	0.987304	380	34966937	35166408	7.33846	4.66655	20.7503	6.4852	27.4707	27.233	0.00769755	0.00770163	0.525662	0.00856175	1.74363e-05	1.1128e-11	0.987304	0.0126787
IBD_deLange_2017	chr10	35066474	rs9299717	LCL	ENSG00000269952	0.9913	380	34966937	35166408	7.33846	4.30085	20.7503	4.18959	25.5228	24.9346	0.00766223	0.00765652	0.528488	0.0082353	0.000121578	7.80357e-12	0.9913	0.00857837
IBD_deLange_2017	chr10	79282718	rs1250573	LCL	ZMIZ1	0.99502	409	79182863	79382609	7.10145	4.96183	17.5549	4.76294	23.4157	22.312	0.00762301	0.00762368	0.531131	0.00795023	4.06879e-05	1.13242e-10	0.99502	0.00493944
IBD_deLange_2017	chr10	92669710	rs7918084	LCL	KIF11	0.00208855	317	92569835	92769637	5.68	4.84707	9.05926	6.50553	13.6294	15.5645	0.00759604	0.00759573	0.00772738	0.533185	2.12627e-05	1.65398e-06	0.00208855	0.997888
IBD_deLange_2017	chr11	1852991	rs907612	LCL	LSP1	0.999724	455	1753436	1944876	5.15789	6.30091	5.42747	11.2945	20.5549	16.6075	0.00757645	0.00757732	0.534376	0.00759832	3.81714e-09	1.34842e-06	0.999724	0.000274419
IBD_deLange_2017	chr12	9736291	rs10844640	LCL	ENSG00000272917	0.9978	645	9639106	9836128	5.11852	4.46952	5.76077	3.97173	11.6304	9.72112	0.00760075	0.00759562	0.533038	0.00773646	4.01783e-05	6.7101e-06	0.9978	0.00214602
IBD_deLange_2017	chr12	111494996	rs7137828	LCL	SH2B3	0.999145	110	111395083	111591487	6.21429	4.45986	12.9259	4.28058	19.9117	17.0799	0.00758462	0.0075833	0.534042	0.00763598	1.31241e-05	2.30886e-09	0.999145	0.000841559
IBD_deLange_2017	chr16	28478021	rs28374519	LCL	SULT1A1	0.00112272	138	28462144	28577122	8.06569	4.48802	26.2841	4.5361	28.2734	30.8196	0.00759476	0.00758415	0.00765454	0.533671	0.000152383	5.46124e-14	0.00112272	0.998725
IBD_deLange_2017	chr16	28478021	rs28374519	LCL	TUFM	0.994563	138	28462144	28577122	8.06569	4.69735	26.2841	5.80171	33.0857	32.0706	0.00762385	0.00763005	0.530702	0.00798218	1.58884e-05	2.02323e-14	0.994563	0.00542075
IBD_deLange_2017	chr16	28839050	rs62036658	LCL	EIF3C	0.0137446	147	28741505	28938730	7.68504	4.73934	24.4242	6.52279	30.7729	30.9404	0.00770244	0.00770682	0.00864868	0.524891	2.14105e-05	3.60053e-13	0.0137446	0.986234
IBD_deLange_2017	chr17	39887396	rs12936409	LCL	GRB7	0.998057	276	39793671	39987295	11.3387	4.38472	57.1459	5.10421	64.2334	62.2227	0.00758288	0.00758733	0.533414	0.00770771	1.18535e-05	2.96962e-28	0.998057	0.001931
IBD_deLange_2017	chr17	39887396	rs12936409	LCL	IKZF3	0.998445	276	39793671	39987295	11.3387	5.9779	57.1459	11.7244	71.0663	68.8408	0.00758296	0.00759164	0.533494	0.0076932	1.27784e-08	2.40268e-28	0.998445	0.00155529
IBD_deLange_2017	chr17	40663193	rs16966101	LCL	CCR7	0.998084	284	40563547	40762944	5.19753	4.61331	5.49592	4.43621	11.9453	9.90727	0.00759842	0.00759239	0.53323	0.00771146	2.2493e-05	7.78891e-06	0.998084	0.00188056
IBD_deLange_2017	chr19	40712706	rs2604913	LCL	ENSG00000277744	0.999634	341	40612801	40812401	5.20161	4.19207	6.16924	1.33939	11.3211	7.36863	0.0075806	0.00758252	0.534349	0.00759086	8.2094e-05	6.55909e-07	0.999634	0.000272764
IBD_deLange_2017	chr19	46636823	rs12984626	LCL	PTGIR	0.995787	374	46537206	46736662	5.10884	8.67736	6.44607	30.6488	38.3376	37.081	0.00761463	0.00761381	0.531699	0.0078914	2.01302e-16	6.52993e-06	0.995787	0.00420655
IBD_deLange_2017	chr20	46006273	rs3761158	LCL	MMP9	0.995438	319	45908293	46106037	4.97638	5.17814	5.41759	7.50916	14.0976	12.9142	0.00761428	0.00761622	0.531437	0.00791428	2.42394e-06	1.9633e-05	0.995438	0.00453976
IBD_deLange_2017	chr20	63697746	rs6062496	LCL	ARFRP1	0.999286	585	63597891	63796751	10.6202	4.60272	46.6778	5.04545	54.6966	51.6943	0.00758192	0.00758112	0.534031	0.00763129	4.67089e-06	3.87825e-24	0.999286	0.000709333
IBD_deLange_2017	chr22	21561877	rs5754100	LCL	CCDC116	0.983688	132	21465221	21660953	8.08125	4.6934	27.0077	7.10007	34.1198	34.0981	0.0077325	0.00774226	0.523063	0.00885781	1.1855e-05	2.68326e-14	0.983688	0.0163005
IBD_deLange_2017	chr22	30174454	rs1978083	LCL	ASCC2	0.998069	276	30075690	30274102	6.20567	9.20894	12.9045	35.2236	50.0976	48.0854	0.00758774	0.00758945	0.533375	0.00771682	9.98802e-19	4.92775e-09	0.998069	0.00193063
IBD_deLange_2017	chr22	30174454	rs1978083	LCL	UQCR10	0.99837	276	30075690	30274102	6.20567	7.14154	12.9045	19.4341	34.4758	32.2978	0.00758644	0.00758605	0.533541	0.00768996	6.07964e-12	4.16513e-09	0.99837	0.00162988
MS_Patsopoulos_2019	chr1	85264137	rs35486093	LCL	BCL10	0.00915271	453	85164147	85363722	6.39564	5.26685	13.8515	6.54605	19.8687	20.3963	0.00766619	0.00766515	0.00826941	0.528189	2.06743e-05	1.38879e-08	0.00915271	0.990827
MS_Patsopoulos_2019	chr1	116547871	rs10801908	LCL	CD58	0.99768	159	116450785	116645482	8.15344	8.51366	26.8369	30.6878	59.3258	57.493	0.00760285	0.00759997	0.532977	0.00774617	1.10537e-16	5.19728e-15	0.99768	0.00231952
MS_Patsopoulos_2019	chr1	157716547	rs2317231	LCL	FCRL3	0.996185	400	157616726	157815354	6.00595	11.5948	11.6602	58.9863	71.9794	70.6291	0.00761396	0.00760467	0.53196	0.00786033	9.07312e-29	3.24111e-08	0.996185	0.00381471
MS_Patsopoulos_2019	chr1	160193656	rs3747621	LCL	PEA15	0.00950612	346	160094628	160293334	5.09765	4.30208	5.34443	4.06163	8.91021	9.40464	0.00768973	0.00767047	0.00830682	0.527696	0.000248817	6.88147e-05	0.00950612	0.990107
MS_Patsopoulos_2019	chr1	160420194	rs3737798	LCL	SLAMF6	0.00787297	295	160321769	160520184	5.26526	6.93238	6.31446	16.7879	22.4346	23.1004	0.00765207	0.00765456	0.0081701	0.529042	7.35884e-10	2.60316e-05	0.00787297	0.992101
MS_Patsopoulos_2019	chr1	160734175	rs983494	LCL	SLAMF7	0.996202	420	160634355	160834012	5.07478	12.3533	6.01079	68.2328	75.5848	74.228	0.00761277	0.00760473	0.531987	0.00785839	8.6768e-33	9.13201e-06	0.996202	0.0037889
MS_Patsopoulos_2019	chr2	112013222	rs57116599	LCL	TMEM87B	0.996695	412	111913350	112113153	5.95556	4.77214	10.5979	6.30202	18.3826	16.8911	0.00761174	0.00761683	0.532283	0.00782865	5.92962e-06	8.08435e-08	0.996695	0.00329854
MS_Patsopoulos_2019	chr2	230257114	rs35540610	LCL	SP110	0.999388	614	230157661	230356537	6.98352	7.85086	16.5825	23.3961	43.0821	39.9333	0.00758214	0.00757966	0.534155	0.00762262	4.39771e-14	4.00106e-11	0.999388	0.000611889
MS_Patsopoulos_2019	chr2	230257114	rs35540610	LCL	SP140	0.999112	614	230157661	230356537	6.98352	17.9242	16.5825	151.825	171.144	168.365	0.00758001	0.00758604	0.533927	0.00763643	1.06296e-69	5.77814e-11	0.999112	0.000887627
MS_Patsopoulos_2019	chr3	28030595	rs438613	LCL	EOMES	0.998822	433	27931312	28130261	8.31166	7.95282	27.5294	23.15	53.1446	50.6453	0.00758197	0.00758831	0.533766	0.00766197	1.06506e-13	1.33594e-15	0.998822	0.00117777
MS_Patsopoulos_2019	chr3	28030595	rs438613	LCL	LINC02084	0.999475	433	27931312	28130261	8.31166	5.58	27.5294	9.38925	40.1533	36.8521	0.00758206	0.00758124	0.534181	0.00760944	4.67074e-08	6.18258e-16	0.999475	0.000524498
MS_Patsopoulos_2019	chr3	121792578	rs13075144	LCL	EAF2	0.993507	470	121692797	121892321	5.95116	16.3162	12.2198	127.019	140.076	139.231	0.00763306	0.00763931	0.530035	0.00806693	4.24963e-58	3.05785e-08	0.993507	0.00649279
MS_Patsopoulos_2019	chr3	121792578	rs13075144	LCL	GOLGB1	0.9958	470	121692797	121892321	5.95116	4.6582	12.2198	6.49125	19.9642	18.7052	0.00761431	0.00761206	0.531758	0.00788792	6.17607e-06	2.00776e-08	0.9958	0.00419385
MS_Patsopoulos_2019	chr3	121792578	rs13075144	LCL	IQCB1	0.992616	470	121692797	121892321	5.95116	18.4805	12.2198	164.411	177.348	176.623	0.00765037	0.00764498	0.529473	0.00813524	2.76811e-74	3.44958e-08	0.992616	0.00738401
MS_Patsopoulos_2019	chr5	177363161	rs67111717	LCL	RGS14	0.998368	198	177264278	177463066	5.02785	5.01287	7.03531	6.49459	15.6737	13.4941	0.00759194	0.00758396	0.533533	0.00769248	2.51705e-06	1.46422e-06	0.998368	0.00162793
MS_Patsopoulos_2019	chr6	135512325	rs4896153	LCL	AHI1	0.998251	142	135413172	135612254	7.37479	22.6859	21.197	247.719	270.922	268.812	0.00759206	0.00758764	0.533439	0.00770651	4.99108e-111	1.18926e-12	0.998251	0.00174874
MS_Patsopoulos_2019	chr6	135512325	rs4896153	LCL	AHI1-DT	0.997111	142	135413172	135612254	7.37479	4.37479	21.197	3.95699	26.7524	25.1158	0.00760898	0.00759825	0.53255	0.00777732	5.50814e-05	1.79132e-12	0.997111	0.0028344
MS_Patsopoulos_2019	chr6	135512325	rs4896153	LCL	ENSG00000234084	0.998085	142	135413172	135612254	7.37479	7.54186	21.197	22.4141	45.563	43.5424	0.0075881	0.00758868	0.533355	0.00771743	3.71755e-13	1.25574e-12	0.998085	0.00191463
MS_Patsopoulos_2019	chr6	137116920	rs62420820	LCL	IFNGR1	0.999409	304	137017711	137215318	7.31911	4.06116	19.5651	2.29144	25.0684	21.7822	0.00758437	0.00758125	0.534195	0.00761683	5.77971e-05	1.81916e-12	0.999409	0.000532892
MS_Patsopoulos_2019	chr7	37342861	rs60600003	LCL	ELMO1	0.99929	629	37243294	37442822	5.0597	5.14616	5.6096	5.85179	14.4302	11.4232	0.00758098	0.0075808	0.534162	0.0076214	2.09409e-06	2.66788e-06	0.99929	0.000704866
MS_Patsopoulos_2019	chr7	149592373	rs354033	LCL	ZNF777	0.998312	386	149492546	149692267	5.69901	6.60701	10.4527	15.4119	27.9864	25.8412	0.00759192	0.00758772	0.533345	0.00770468	3.45002e-10	4.91265e-08	0.998312	0.00168787
MS_Patsopoulos_2019	chr8	78723008	rs1483572	LCL	ENSG00000285744	0.996263	379	78623016	78823008	5.74826	9.23362	11.3926	36.6989	49.4455	48.0759	0.00761033	0.00761206	0.531964	0.00784962	4.2436e-19	4.15141e-08	0.996263	0.00373698
MS_Patsopoulos_2019	chr8	78723008	rs1483572	LCL	IL7	0.997286	379	78623016	78823008	5.74826	8.63211	11.3926	29.9793	43.0349	41.3562	0.0075882	0.00760031	0.53274	0.00776983	2.57258e-16	3.04189e-08	0.997286	0.00271423
MS_Patsopoulos_2019	chr8	78723008	rs1483572	LCL	LINC02605	0.997769	379	78623016	78823008	5.74826	4.18573	11.3926	4.31515	17.5763	15.6927	0.00760086	0.00759714	0.533071	0.00773596	2.93472e-05	2.47536e-08	0.997769	0.00220139
MS_Patsopoulos_2019	chr8	78723008	rs1483572	LCL	ZC2HC1A	0.994003	379	78623016	78823008	5.74826	25.47	11.3926	315.433	327.731	326.811	0.00763034	0.00762963	0.530458	0.0080278	5.90541e-140	6.52162e-08	0.994003	0.00599682
MS_Patsopoulos_2019	chr10	79299578	rs1250551	LCL	ZMIZ1	0.995858	390	79199760	79399282	6.66417	4.96183	15.4181	4.90249	21.5905	20.3131	0.00761866	0.00760663	0.531719	0.00787717	2.97687e-05	8.05716e-10	0.995858	0.00411263
MS_Patsopoulos_2019	chr10	92719350	rs1112718	LCL	KIF11	0.998359	326	92619466	92819165	6.32925	4.76869	12.5904	6.11479	20.8588	18.6849	0.00759404	0.00758763	0.533484	0.00769266	3.64515e-06	5.61096e-09	0.998359	0.00163725
MS_Patsopoulos_2019	chr11	321138	rs35218683	LCL	IFITM2	0.00414435	734	221195	419994	5.6545	13.8903	8.63214	86.3204	93.6809	94.9519	0.00761666	0.00761105	0.00788623	0.531615	4.63612e-40	2.54332e-06	0.00414435	0.995853
MS_Patsopoulos_2019	chr11	47338861	rs2269434	LCL	ACP2	0.984774	371	47239709	47438755	5.01746	8.79329	6.40314	31.835	38.3139	38.2333	0.00771958	0.00772727	0.523879	0.00876714	2.00925e-16	2.23031e-05	0.984774	0.0152041
MS_Patsopoulos_2019	chr11	47338861	rs2269434	LCL	NR1H3	0.996058	371	47239709	47438755	5.01746	6.0273	6.40314	12.015	19.7229	18.4028	0.00760848	0.00760942	0.531818	0.00786719	2.3394e-08	6.40281e-06	0.996058	0.0039356
MS_Patsopoulos_2019	chr11	65937961	rs531612	LCL	BANF1	0.992602	266	65839924	66037917	5.33782	7.47506	9.11979	22.097	31.9329	31.2098	0.00764644	0.00764737	0.529479	0.00813226	1.77325e-12	7.66953e-07	0.992602	0.00739748
MS_Patsopoulos_2019	chr11	65937961	rs531612	LCL	EIF1AD	0.995616	266	65839924	66037917	5.33782	6.60536	9.11979	15.6708	25.9908	24.7734	0.0076129	0.00761597	0.531438	0.00790497	6.71765e-10	4.70413e-07	0.995616	0.00438383
MS_Patsopoulos_2019	chr12	57713053	rs701006	LCL	EEF1AKMT3	0.990642	287	57613895	57809571	6.76325	19.5322	16.5615	184.126	201.185	200.676	0.00766219	0.00765731	0.528018	0.00829495	9.47764e-83	5.60816e-10	0.990642	0.00935778
MS_Patsopoulos_2019	chr12	57713053	rs701006	LCL	OS9	0.0040992	287	57613895	57809571	6.76325	9.37454	16.5615	37.0569	52.3365	53.6171	0.00761044	0.00761256	0.00787768	0.531781	1.15034e-18	9.16239e-10	0.0040992	0.995901
MS_Patsopoulos_2019	chr12	57713053	rs701006	LCL	TSFM	0.993126	287	57613895	57809571	6.76325	15.5444	16.5615	114.811	132.152	131.361	0.00764328	0.00764112	0.529723	0.00809069	9.03019e-53	4.21503e-10	0.993126	0.00687427
MS_Patsopoulos_2019	chr12	57713053	rs701006	LCL	TSPAN31	0.996587	287	57613895	57809571	6.76325	4.02557	16.5615	2.00217	20.129	18.5498	0.00764012	0.00760859	0.532264	0.00779642	0.00040375	1.91115e-10	0.996587	0.00300898
MS_Patsopoulos_2019	chr12	123431550	rs35416759	LCL	CDK2AP1	0.993801	291	123333016	123529704	5.21093	9.79429	8.17306	41.098	50.1464	49.2578	0.007631	0.00764012	0.530233	0.00804003	8.4459e-21	1.68375e-06	0.993801	0.00619744
MS_Patsopoulos_2019	chr14	103445858	rs11622356	LCL	COA8	0.995576	421	103345983	103545857	4.99563	5.22591	7.30022	7.13061	15.6313	14.4224	0.0076215	0.00761456	0.531528	0.00790076	3.43921e-06	2.90004e-06	0.995576	0.00441787
MS_Patsopoulos_2019	chr16	30091839	rs3809627	LCL	GDPD3	0.985187	195	29992435	30186830	5.52761	4.32781	8.00439	4.43479	12.5466	12.4336	0.0077284	0.00771038	0.524263	0.00872942	0.00015467	4.34644e-06	0.985187	0.0146509
MS_Patsopoulos_2019	chr16	30091839	rs3809627	LCL	TBX6	0.99986	195	29992435	30186830	5.52761	10.6674	8.00439	48.1823	60.1889	55.5699	0.00757806	0.00758172	0.534422	0.00758685	3.07715e-25	8.65761e-08	0.99986	0.000139995
MS_Patsopoulos_2019	chr16	85987899	rs35703946	LCL	IRF8	0.00999828	793	85888003	86086924	6.00292	7.63634	8.78427	20.5415	28.8763	29.3248	0.00766922	0.00766851	0.00834441	0.527597	1.72754e-11	2.2054e-06	0.00999828	0.99
MS_Patsopoulos_2019	chr17	36486677	rs4796224	LCL	ZNHIT3	0.997546	122	36422736	36586440	5.23803	24.7096	8.38876	297.626	307.699	305.922	0.00759126	0.00760567	0.532883	0.00775	1.45784e-132	6.00969e-07	0.997546	0.00245355
MS_Patsopoulos_2019	chr19	6668961	rs1077667	LCL	TNFSF14	0.999977	730	6569178	6768842	7.15486	8.67016	16.7677	27.7914	50.3064	43.8819	0.00757616	0.00757084	0.534577	0.00757357	3.8526e-17	2.36049e-12	0.999977	2.29696e-05
MS_Patsopoulos_2019	chr19	18191169	rs4808760	LCL	MPV17L2	0.999286	525	18091302	18291069	7.22967	6.05229	19.0594	11.6048	33.6227	30.6272	0.00758192	0.00758112	0.534031	0.00763129	6.71644e-09	3.88679e-12	0.999286	0.00071415
MS_Patsopoulos_2019	chr19	49333989	rs1465697	LCL	CD37	0.999544	421	49234115	49432279	6.62473	7.57444	14.7652	21.0125	39.1386	35.6975	0.00757948	0.00757626	0.534262	0.00761237	3.68512e-13	1.90307e-10	0.999544	0.000456183
MS_Patsopoulos_2019	chr19	49333989	rs1465697	LCL	ENSG00000268686	0.99872	421	49234115	49432279	6.62473	6.68007	14.7652	15.2906	32.4358	30.0183	0.00758929	0.00759577	0.533664	0.00767103	3.00694e-10	5.0896e-10	0.99872	0.00127976
MS_Patsopoulos_2019	chr19	49333989	rs1465697	LCL	KASH5	0.995118	421	49234115	49432279	6.62473	7.49911	14.7652	22.0983	37.9666	36.8529	0.00761576	0.00762115	0.531278	0.0079375	1.19672e-12	1.83246e-09	0.995118	0.00488161
MS_Patsopoulos_2019	chr22	21851064	rs9610458	LCL	MAPK1	0.999572	275	21752246	21950844	6.91821	7.10162	17.2791	17.6177	38.2809	34.7779	0.00757863	0.0075727	0.534335	0.00760279	1.07313e-11	1.50433e-11	0.999572	0.000428227
MS_Patsopoulos_2019	chr22	21851064	rs9610458	LCL	PPM1F	0.00466519	275	21752246	21950844	6.91821	5.23218	17.2791	7.86307	23.9836	25.1412	0.00760972	0.00761601	0.00792472	0.531302	5.48953e-06	4.47248e-10	0.00466519	0.995329
MS_Patsopoulos_2019	chr22	21851064	rs9610458	LCL	PPM1F-AS1	0.983293	275	21752246	21950844	6.91821	5.81876	17.2791	10.0852	27.3623	27.3604	0.00773211	0.00773917	0.522923	0.00890086	6.07414e-07	4.56665e-10	0.983293	0.0167062
PBC_Cordell_2021	chr1	67354511	rs6679356	LCL	SERBP1	0.998102	204	67255184	67446576	16.8058	4.22817	132.108	1.74737	135.983	133.788	0.00761155	0.00759014	0.533306	0.00768998	0.000295548	7.15241e-61	0.998102	0.00160236
PBC_Cordell_2021	chr1	116522461	rs10802191	LCL	CD58	0.992231	55	116473748	116561593	5.5526	8.51366	11.5439	31.6983	43.8888	43.2105	0.00765025	0.00764802	0.529093	0.00816324	1.28678e-16	7.2832e-08	0.992231	0.0077689
PBC_Cordell_2021	chr1	157700500	rs945635	LCL	FCRL3	0.999045	200	157606366	157767714	5.65128	11.5948	9.99079	59.6794	72.2664	69.5593	0.00758307	0.00758253	0.533833	0.00764543	1.27661e-29	4.84755e-08	0.999045	0.000954726
PBC_Cordell_2021	chr2	134583630	rs859767	LCL	TMEM163	0.998465	292	134483701	134682182	6.03978	4.58836	11.6115	4.40319	18.2318	15.982	0.00758447	0.00759327	0.533496	0.0076866	1.89217e-05	1.40257e-08	0.998465	0.00151644
PBC_Cordell_2021	chr2	190391157	rs11892526	LCL	MFSD6	1.03741e-10	380	190293050	190490807	8.70164	16.6342	29.9515	130.121	141.34	160.072	0.00756962	0.00757645	0.00757544	0.534567	4.36867e-59	1.39216e-15	1.03741e-10	1
PBC_Cordell_2021	chr2	190391157	rs11892526	LCL	NEMP2	0.000715504	380	190293050	190490807	8.70164	14.1099	29.9515	92.5766	119.534	122.528	0.00758112	0.00758192	0.00763129	0.534031	8.83949e-43	1.39377e-15	0.000715504	0.999284
PBC_Cordell_2021	chr2	190679236	rs3771317	LCL	NAB1	0.984262	241	190581965	190778487	9.72404	5.09183	40.5468	6.71889	47.3137	47.2605	0.0077114	0.0077228	0.523465	0.00881805	1.66924e-05	3.40327e-20	0.984262	0.015721
PBC_Cordell_2021	chr3	160012361	rs485789	LCL	IL12A	0.998651	438	159912550	160103814	15.7353	9.38237	116.156	37.9974	156.502	154.137	0.0075786	0.00758432	0.533655	0.00767272	4.26154e-20	4.8525e-54	0.998651	0.00134857
PBC_Cordell_2021	chr3	160012361	rs485789	LCL	IL12A-AS1	0.998286	438	159912550	160103814	15.7353	4.13478	116.156	3.76588	122.058	119.906	0.00758914	0.00759311	0.533456	0.00769886	3.88485e-05	6.01348e-54	0.998286	0.00167534
PBC_Cordell_2021	chr3	160012361	rs485789	LCL	SCHIP1	0.998383	438	159912550	160103814	15.7353	4.62316	116.156	5.95996	124.288	122.099	0.00758418	0.00758941	0.533518	0.0076943	4.17149e-06	5.79417e-54	0.998383	0.00161288
PBC_Cordell_2021	chr4	105207797	rs7663401	LCL	PPA2	0.999198	224	105108907	105306975	5.55593	6.59369	9.32817	13.9468	26.072	23.192	0.00758324	0.00758205	0.534069	0.00763437	7.58871e-10	7.69042e-08	0.999198	0.000801775
PBC_Cordell_2021	chr5	142130032	rs10062349	LCL	NDFIP1	0.997003	422	142057091	142229458	5.3821	8.15433	9.35511	26.9506	37.8745	36.2906	0.00760128	0.00760557	0.53255	0.00780106	5.8536e-15	2.56608e-07	0.997003	0.00299641
PBC_Cordell_2021	chr7	37342861	rs60600003	LCL	ELMO1	0.999551	450	37243294	37433521	7.23363	5.14616	18.6325	6.21002	28.2479	24.7896	0.00757661	0.00757945	0.534251	0.00761168	9.45477e-07	3.80874e-12	0.999551	0.00044836
PBC_Cordell_2021	chr7	128977412	rs12531711	LCL	IRF5	7.7385e-09	202	128879108	129077251	13.4056	8.82312	83.2871	31.533	100.4	114.82	0.00757645	0.00756962	0.00757544	0.534567	2.8632e-16	9.54902e-39	7.7385e-09	1
PBC_Cordell_2021	chr7	128977412	rs12531711	LCL	TNPO3	0.000327563	202	128879108	129077251	13.4056	4.03522	83.2871	1.52481	81.0364	84.8117	0.00781011	0.00761133	0.00762878	0.532168	0.00318392	9.61319e-39	0.000327563	0.996489
PBC_Cordell_2021	chr9	133941696	rs2428004	LCL	VAV2	0.995209	144	133856305	134009036	5.02355	12.3988	7.44458	68.3923	76.9393	75.8059	0.00761938	0.00761976	0.53119	0.00793768	9.40647e-33	2.77144e-06	0.995209	0.00478811
PBC_Cordell_2021	chr11	64342950	rs11601860	LCL	CCDC88B	0.99478	213	64245312	64440016	6.41044	7.70183	14.5389	23.0602	38.6375	37.5873	0.00762582	0.00762693	0.530951	0.00796353	4.88761e-13	2.45422e-09	0.99478	0.00522029
PBC_Cordell_2021	chr11	64342950	rs11601860	LCL	ENSG00000236935	0.989122	213	64245312	64440016	6.41044	22.1474	14.5389	235.213	250.113	249.74	0.00767673	0.00767751	0.526894	0.0084139	7.0838e-105	4.87244e-09	0.989122	0.0108785
PBC_Cordell_2021	chr12	42452439	rs34740771	LCL	PPHLN1	0.996421	407	42352501	42551634	5.13452	5.16743	6.27462	7.63806	15.3175	13.9036	0.00760986	0.0076117	0.532127	0.00784147	1.68477e-06	6.58844e-06	0.996421	0.00357092
PBC_Cordell_2021	chr12	42452439	rs34740771	LCL	ZCRB1	0.997171	407	42352501	42551634	5.13452	5.48874	6.27462	9.71163	17.6154	15.9746	0.00759974	0.007605	0.532681	0.00778129	1.68996e-07	5.25836e-06	0.997171	0.0028233
PBC_Cordell_2021	chr12	111469627	rs35350651	LCL	SH2B3	0.999573	73	111406414	111565546	8.90352	4.32564	33.2126	3.81495	40.1957	36.6574	0.00758252	0.00758245	0.534238	0.00760608	1.3157e-05	2.24873e-18	0.999573	0.00041362
PBC_Cordell_2021	chr13	42480866	rs9533122	LCL	TNFSF11	0.998504	254	42381390	42580823	7.20439	10.9471	19.8766	52.3928	74.4889	72.2259	0.00758648	0.00758442	0.533607	0.00768603	2.71867e-26	3.59621e-12	0.998504	0.00149642
PBC_Cordell_2021	chr15	78939988	rs11856301	LCL	CTSH	0.99677	246	78839988	79035840	5.14471	23.9934	7.54994	277.663	286.687	285.177	0.00760771	0.00760946	0.532365	0.00781011	8.42825e-124	1.71611e-06	0.99677	0.00322808
PBC_Cordell_2021	chr16	11289662	rs4451969	LCL	RMI2	0.00365415	405	11197656	11389618	8.94672	18.7029	31.9842	164.65	195.242	196.633	0.00760924	0.00761267	0.00784118	0.532067	4.44295e-74	1.8353e-16	0.00365415	0.996346
PBC_Cordell_2021	chr16	68003036	rs79577483	LCL	PSKH1	0.0119582	114	67906447	68102719	6.77664	4.83034	17.6816	6.89247	24.2794	24.5679	0.00769789	0.00768773	0.00849877	0.526187	1.47673e-05	3.04135e-10	0.0119582	0.988027
PBC_Cordell_2021	chr16	68275946	rs55651156	LCL	CARMIL2	0.998958	181	68263155	68375632	5.4669	4.23608	8.59496	3.54407	14.7182	12.0676	0.00758549	0.00757893	0.533907	0.00765154	3.11001e-05	1.9898e-07	0.998958	0.00101085
PBC_Cordell_2021	chr16	68275946	rs55651156	LCL	PRMT7	0.0047805	181	68263155	68375632	5.4669	13.667	8.59496	86.6894	94.1472	95.2818	0.00762297	0.00762792	0.00793558	0.531225	3.21472e-40	2.65102e-06	0.0047805	0.995217
PBC_Cordell_2021	chr16	68275946	rs55651156	LCL	SMPD3	0.0127452	181	68263155	68375632	5.4669	6.76304	8.59496	17.7138	26.0715	26.3037	0.00769397	0.00769411	0.00856173	0.525754	2.94437e-10	2.68704e-06	0.0127452	0.987252
PBC_Cordell_2021	chr16	85985665	rs11117432	LCL	IRF8	0.99993	256	85888003	86064804	10.1715	7.21828	43.385	17.9527	66.1718	60.862	0.00757196	0.00757696	0.534488	0.00757534	1.799e-12	1.62267e-23	0.99993	7.00494e-05
PBC_Cordell_2021	chr17	39895095	rs8067378	LCL	GRB7	0.99724	271	39803764	39994761	12.0615	4.37741	65.6083	4.34048	71.607	69.9323	0.00760846	0.00758788	0.532752	0.00777045	3.53491e-05	8.68785e-32	0.99724	0.00272514
PBC_Cordell_2021	chr17	39895095	rs8067378	LCL	GSDMA	0.00197463	271	39803764	39994761	12.0615	6.15856	65.6083	12.137	75.7551	77.7449	0.00758926	0.00759029	0.00771892	0.533373	7.61141e-08	4.56245e-31	0.00197463	0.998025
PBC_Cordell_2021	chr17	39895095	rs8067378	LCL	GSDMB	0.999129	271	39803764	39994761	12.0615	14.6134	65.6083	99.9795	168.343	165.545	0.0075802	0.00758597	0.533923	0.00763631	3.42647e-47	2.89978e-32	0.999129	0.000871144
PBC_Cordell_2021	chr17	39895095	rs8067378	LCL	ORMDL3	0.999544	271	39803764	39994761	12.0615	27.2542	65.6083	361.671	430.62	427.178	0.00757948	0.00757626	0.534262	0.00761237	4.25819e-161	1.61274e-32	0.999544	0.000455962
PBC_Cordell_2021	chr17	39895095	rs8067378	LCL	ZPBP2	0.998894	271	39803764	39994761	12.0615	4.53335	65.6083	4.97893	73.1187	70.5507	0.00758172	0.00758372	0.53372	0.00765469	7.7675e-06	3.62559e-32	0.998894	0.00109869
PBC_Cordell_2021	chr17	46088069	rs3912060	LCL	ARHGAP27	0.983823	551	45988303	46121924	6.44985	11.1948	16.7612	57.079	73.8663	73.8382	0.0077356	0.00772875	0.523173	0.00884725	2.30319e-27	7.44302e-10	0.983823	0.0161765
PBC_Cordell_2021	chr17	46088069	rs3912060	LCL	ENSG00000285668	0.00556726	551	45988303	46121924	6.44985	16.3392	16.7612	122.887	138.658	139.647	0.00762959	0.00762998	0.00798944	0.530688	6.11534e-56	7.52391e-10	0.00556726	0.994433
PBC_Cordell_2021	chr17	46088069	rs3912060	LCL	LRRC37A2	0.0160263	551	45988303	46121924	6.44985	6.39553	16.7612	16.2928	33.0165	33.0521	0.00772362	0.00773182	0.00883394	0.523416	1.22158e-09	7.65535e-10	0.0160263	0.983974
PBC_Cordell_2021	chr18	69858790	rs1808094	LCL	CD226	0.997781	160	69758904	69896479	5.94353	4.4981	12.5061	5.12742	19.4762	17.5946	0.00760316	0.00759691	0.533009	0.00773409	1.33723e-05	8.34302e-09	0.997781	0.00220552
PBC_Cordell_2021	chr18	69858790	rs1808094	LCL	DOK6	0.00960076	160	69758904	69896479	5.94353	8.62894	12.5061	29.2119	41.2281	41.7128	0.00766924	0.00766157	0.00830931	0.527905	2.97637e-15	5.35147e-08	0.00960076	0.990399
PBC_Cordell_2021	chr19	18125072	rs1811241	LCL	IL12RB1	0.994614	255	18026684	18225008	5.40297	13.2591	8.49461	80.0726	89.5721	88.5506	0.00762885	0.00762408	0.530818	0.00798184	8.78345e-38	1.06983e-06	0.994614	0.00538492
PBC_Cordell_2021	chr19	18125072	rs1811241	LCL	MAST3	0.995404	255	18026684	18225008	5.40297	5.12263	8.49461	7.59339	17.2491	16.077	0.00762152	0.00762054	0.531421	0.00791729	2.25214e-06	9.14414e-07	0.995404	0.00459325
PBC_Cordell_2021	chr19	18125072	rs1811241	LCL	MPV17L2	0.991422	255	18026684	18225008	5.40297	6.05229	8.49461	12.2115	21.2862	20.6991	0.00765804	0.00765851	0.528574	0.00822496	3.99917e-08	1.6452e-06	0.991422	0.00857647
RA_Ishigaki_2021_EUR	chr1	67336688	rs6659932	LCL	IL12RB2	0.9994	448	67236843	67436539	5.78977	4.28829	9.91372	2.21031	15.3335	12.0557	0.00758437	0.00758125	0.534195	0.00761683	6.28321e-05	2.83436e-08	0.9994	0.000537387
RA_Ishigaki_2021_EUR	chr1	67336688	rs6659932	LCL	SERBP1	0.999307	448	67236843	67436539	5.78977	4.23087	9.91372	2.06211	15.0845	11.9365	0.00758456	0.00757651	0.534146	0.00762118	8.06006e-05	3.13303e-08	0.999307	0.000612252
RA_Ishigaki_2021_EUR	chr1	92472528	rs6603974	LCL	GFI1	0.998211	305	92373194	92571555	5.14451	5.21523	6.38091	7.92696	16.366	14.2769	0.00759393	0.00759147	0.533406	0.00770679	6.5486e-07	3.07218e-06	0.998211	0.00178541
RA_Ishigaki_2021_EUR	chr1	161510859	rs11810143	LCL	ENSG00000283317	0.994418	424	161410911	161610475	5.88718	4.30438	11.2168	4.05628	16.2677	15.265	0.00763027	0.00762296	0.530782	0.00798801	9.15409e-05	7.10269e-08	0.994418	0.00549064
RA_Ishigaki_2021_EUR	chr1	243324559	rs12058508	LCL	SDCCAG8	0.00448903	263	243225068	243421043	5.16667	9.28281	6.52379	35.2535	40.5807	41.7752	0.0076157	0.00762244	0.00791261	0.531432	6.99547e-18	2.10057e-05	0.00448903	0.99549
RA_Ishigaki_2021_EUR	chr2	100240555	rs12474386	LCL	AFF3	0.994756	575	100140818	100340487	7.75194	8.11106	22.2367	25.0445	48.32	47.2742	0.00762158	0.00762428	0.530903	0.00796494	6.71283e-14	1.11287e-12	0.994756	0.00524415
RA_Ishigaki_2021_EUR	chr4	48691230	rs6829081	LCL	OCIAD1	0.987682	155	48592642	48788319	4.97661	7.05062	6.72396	20.1928	27.1728	26.9097	0.00769739	0.00769065	0.525995	0.00852523	1.90181e-11	1.34351e-05	0.987682	0.0123047
RA_Ishigaki_2021_EUR	chr5	10690637	rs5745271	LCL	DAP	1.70597e-05	653	10591020	10790438	5.71756	14.1343	9.59244	89.0256	91.8961	98.618	0.00757616	0.00757084	0.00757357	0.534577	3.07682e-41	9.66462e-07	1.70597e-05	0.999982
RA_Ishigaki_2021_EUR	chr5	134087125	rs244689	LCL	TCF7	0.994117	454	133987707	134186262	4.8956	7.63485	5.43767	21.2042	27.5753	26.6341	0.00763042	0.00763656	0.53044	0.00801216	3.47608e-12	2.44773e-05	0.994117	0.00585834
RA_Ishigaki_2021_EUR	chr6	15195451	rs113532504	LCL	JARID2	0.996234	579	15095543	15295160	5.65116	5.59106	8.60746	7.99393	17.9559	16.5932	0.00761206	0.00761659	0.5319	0.00785115	1.24186e-06	6.72782e-07	0.996234	0.00376413
RA_Ishigaki_2021_EUR	chr6	36383215	rs1885205	LCL	ETV7	0.999099	503	36284336	36482924	5.52217	5.48017	7.84932	7.52698	18.0985	15.3327	0.00758788	0.00758001	0.533919	0.00764028	5.02434e-07	3.6361e-07	0.999099	0.000899642
RA_Ishigaki_2021_EUR	chr6	167127770	rs3093017	LCL	CEP43	0.99914	607	167028136	167227667	8.88462	5.87336	30.8034	10.3731	43.9619	41.1516	0.00758597	0.0075802	0.533923	0.00763631	2.73845e-08	3.66789e-17	0.99914	0.000860129
RA_Ishigaki_2021_EUR	chr7	37342861	rs60600003	LCL	ELMO1	0.999152	706	37243294	37442822	5.00481	5.14616	5.60573	5.76834	14.174	11.3419	0.00757831	0.00758177	0.53397	0.00763618	2.69495e-06	3.17226e-06	0.999152	0.000841482
RA_Ishigaki_2021_EUR	chr7	128935498	rs3778754	LCL	IRF5	0.00174674	365	128835777	129035495	8.41237	9.43683	29.1685	35.3419	62.399	64.5099	0.00759206	0.00758764	0.00770651	0.533439	6.36707e-18	3.05298e-15	0.00174674	0.998253
RA_Ishigaki_2021_EUR	chr7	128935498	rs3778754	LCL	TNPO3	0.995008	365	128835777	129035495	8.41237	4.03522	29.1685	1.28309	31.7687	30.4436	0.00769177	0.0076197	0.531084	0.0078763	0.00107017	8.21994e-16	0.995008	0.00392184
RA_Ishigaki_2021_EUR	chr8	11493711	rs1382568	LCL	BLK	0.999268	758	11393931	11593319	6.68323	14.0228	14.9345	88.9667	106.829	103.858	0.00758112	0.00758192	0.534031	0.00763129	1.74785e-42	2.47922e-10	0.999268	0.000731988
RA_Ishigaki_2021_EUR	chr8	11493711	rs1382568	LCL	ENSG00000269954	0.999531	758	11393931	11593319	6.68323	11.52	14.9345	57.6369	75.9254	72.5126	0.00757948	0.00757626	0.534262	0.00761237	4.60983e-29	1.61779e-10	0.999531	0.000469292
RA_Ishigaki_2021_EUR	chr8	11493711	rs1382568	LCL	FAM167A	0.998245	758	11393931	11593319	6.68323	20.2663	14.9345	194.703	211.719	209.612	0.00759206	0.00758764	0.533439	0.00770651	4.90074e-88	5.78869e-10	0.998245	0.0017549
RA_Ishigaki_2021_EUR	chr8	11493711	rs1382568	LCL	GATA4	0.998842	758	11393931	11593319	6.68323	4.24225	14.9345	2.84715	20.3319	17.7596	0.00759294	0.00758199	0.533862	0.0076534	6.43274e-05	3.61664e-10	0.998842	0.00109334
RA_Ishigaki_2021_EUR	chr8	80396260	rs6984791	LCL	LINC02986	0.993381	435	80296726	80496174	4.97126	4.04204	6.26129	2.15011	9.34528	8.40568	0.00767826	0.00764049	0.529925	0.00802094	0.000658881	1.07449e-05	0.993381	0.00587577
RA_Ishigaki_2021_EUR	chr9	120897978	rs577932181	LCL	TRAF1	0.992694	410	120798555	120997895	6.08527	4.24156	12.1423	4.90794	17.7884	17.0462	0.00764437	0.0076454	0.529515	0.00812843	5.06077e-05	3.65129e-08	0.992694	0.00725518
RA_Ishigaki_2021_EUR	chr10	6056986	rs706778	LCL	RBM17	0.999493	638	5957481	6156727	8.1875	5.22093	24.2067	6.5334	34.0394	30.7018	0.00757947	0.00758202	0.534215	0.00761468	7.61038e-07	1.60751e-14	0.999493	0.000506101
RA_Ishigaki_2021_EUR	chr11	61779596	rs7943728	LCL	FADS2	0.000250422	379	61679851	61878495	5.37705	10.3781	7.23134	45.9605	49.1531	53.1918	0.00757585	0.00757796	0.00759722	0.534406	1.55265e-22	1.02582e-05	0.000250422	0.999739
RA_Ishigaki_2021_EUR	chr11	61779596	rs7943728	LCL	TMEM258	0.998728	379	61679851	61878495	5.37705	9.63074	7.23134	38.3844	47.9977	45.5741	0.00758876	0.00758409	0.533646	0.00766489	2.8039e-20	9.48614e-07	0.998728	0.00127098
RA_Ishigaki_2021_EUR	chr11	61779596	rs7943728	LCL	GNG3	0.998274	337	61707761	61878495	5.37705	4.13243	7.34877	2.2686	11.8097	9.58374	0.0076016	0.00759296	0.533399	0.00769455	0.000164347	1.02088e-06	0.998274	0.00155479
RA_Ishigaki_2021_EUR	chr12	57722614	rs1696466	LCL	OS9	0.986906	335	57623918	57819702	5.48462	9.37454	9.29118	37.0425	46.5379	46.3282	0.00770431	0.00769306	0.525466	0.00859784	9.64763e-19	1.08646e-06	0.986906	0.0130928
RA_Ishigaki_2021_EUR	chr12	111446804	rs3184504	LCL	SH2B3	0.999286	154	111347782	111546250	6.46715	4.3917	13.9638	3.81443	20.6888	17.6687	0.00758286	0.00758467	0.534052	0.00762837	1.70345e-05	6.66184e-10	0.999286	0.000696505
RA_Ishigaki_2021_EUR	chr16	11704902	rs4584833	LCL	SNN	0.988258	550	11605444	11804622	6.26866	6.33799	12.5288	14.0875	26.9185	26.6136	0.00767894	0.00768917	0.526385	0.00848386	8.11881e-09	3.86358e-08	0.988258	0.0117419
RA_Ishigaki_2021_EUR	chr16	30153437	rs62055376	LCL	GDPD3	0.994635	139	30055011	30201662	5.23704	4.44742	7.68175	5.05031	13.7434	12.712	0.00763109	0.00762492	0.530785	0.00797586	3.33262e-05	2.3967e-06	0.994635	0.00532812
RA_Ishigaki_2021_EUR	chr16	30153437	rs62055376	LCL	MAPK3	0.989692	139	30055011	30201662	5.23704	16.1374	7.68175	122.797	130.879	130.459	0.00767628	0.00767214	0.527373	0.0083631	4.51322e-56	4.44619e-06	0.989692	0.0103036
RA_Ishigaki_2021_EUR	chr16	30153437	rs62055376	LCL	NPIPB12	0.986531	139	30055011	30201662	5.23704	4.50815	7.68175	5.39477	13.2553	13.0664	0.00771364	0.00770538	0.525126	0.00862031	5.50238e-05	5.58292e-06	0.986531	0.0134066
RA_Ishigaki_2021_EUR	chr17	39882138	rs62067029	LCL	GRB7	0.996698	340	39783586	39981845	6.30303	4.60481	13.7447	5.31845	20.5417	19.0483	0.00760764	0.00760864	0.53234	0.00781492	1.59131e-05	3.48596e-09	0.996698	0.00328653
RA_Ishigaki_2021_EUR	chr17	39882138	rs62067029	LCL	GSDMB	0.00619659	340	39783586	39981845	6.30303	14.6134	13.7447	99.7526	112.607	113.495	0.007631	0.00764012	0.00804003	0.530233	6.82732e-46	1.54e-08	0.00619659	0.993803
RA_Ishigaki_2021_EUR	chr17	39882138	rs62067029	LCL	IKZF3	0.998258	340	39783586	39981845	6.30303	6.07482	13.7447	12.2269	28.0647	25.9512	0.00758764	0.00759206	0.533439	0.00770651	8.57398e-09	1.88046e-09	0.998258	0.00174227
RA_Ishigaki_2021_EUR	chr17	39882138	rs62067029	LCL	ORMDL3	0.00343605	340	39783586	39981845	6.30303	27.2542	13.7447	361.444	373.736	375.187	0.00760876	0.00760511	0.00783596	0.532271	1.51738e-159	1.53099e-08	0.00343605	0.996564
RA_Ishigaki_2021_EUR	chr17	39882138	rs62067029	LCL	ZPBP2	0.994297	340	39783586	39981845	6.30303	4.912	13.7447	5.58253	20.2877	19.3175	0.00762811	0.00762539	0.530632	0.0080002	2.05865e-05	5.86982e-09	0.994297	0.00568192
RA_Ishigaki_2021_EUR	chr19	19241346	rs56352336	LCL	YJEFN3	0.997276	407	19141521	19340782	5.45815	4.48993	8.69326	4.85324	15.2156	13.5327	0.00760944	0.00759425	0.532787	0.00776914	2.0942e-05	4.49209e-07	0.997276	0.00270262
RA_Ishigaki_2021_EUR	chr19	19454548	rs113980591	LCL	TSSK6	0.00418668	301	19354720	19553268	5.15591	4.15892	8.1189	4.18085	11.0377	12.2989	0.00762985	0.00761135	0.00788989	0.531564	0.000218627	4.24988e-06	0.00418668	0.995587
RA_Ishigaki_2021_EUR	chr21	42415901	rs80054410	LCL	UBASH3A	0.999591	701	42316149	42515798	5.53077	7.70752	8.15753	20.3142	31.9434	28.3929	0.00757942	0.00757427	0.534307	0.00760347	6.63148e-13	1.26157e-07	0.999591	0.000408407
RA_Ishigaki_2021_EUR	chr22	21624807	rs11089637	LCL	CCDC116	0.992071	388	21555991	21724564	6.34286	4.6934	12.7259	6.2598	19.6403	18.9787	0.00765213	0.0076458	0.529008	0.00817871	1.42546e-05	2.21517e-08	0.992071	0.00791433
SLE_Bentham_2015	chr3	160030580	rs112992337	LCL	IL12A	0.9981	446	159930612	160128371	5.20954	9.38237	7.64121	37.7353	47.3844	45.3559	0.00758651	0.00758843	0.533343	0.00771358	7.79752e-20	9.15762e-07	0.9981	0.00189873
SLE_Bentham_2015	chr3	160030580	rs112992337	LCL	IL12A-AS1	0.998416	446	159930612	160128371	5.20954	4.13478	7.64121	3.52637	13.3844	11.1469	0.00759238	0.00759244	0.533358	0.00768973	4.5543e-05	7.43657e-07	0.998416	0.00153627
SLE_Bentham_2015	chr3	160030580	rs112992337	LCL	SCHIP1	0.998613	446	159930612	160128371	5.20954	4.76757	7.64121	5.77702	15.7374	13.3955	0.00759264	0.00759006	0.53353	0.00767839	4.33012e-06	6.71033e-07	0.998613	0.00138169
SLE_Bentham_2015	chr5	100848943	rs55849330	LCL	ST8SIA4	0.00878339	250	100749174	100948704	4.92563	5.12142	7.73092	8.47412	15.6374	16.2029	0.00766386	0.00766468	0.00824303	0.528395	3.00815e-06	6.3258e-06	0.00878339	0.991207
SLE_Bentham_2015	chr5	160460329	rs2431098	LCL	MIR3142HG	0.999966	369	160360835	160559921	7.92722	4.82182	22.6154	3.57597	31.5072	25.4176	0.00757316	0.00757541	0.53459	0.00757958	1.94788e-06	1.0495e-14	0.999966	3.21301e-05
SLE_Bentham_2015	chr7	128945562	rs35000415	LCL	IRF5	3.60228e-11	310	128846309	129045409	14.1502	9.43683	93.0149	35.5052	108.73	128.52	0.00756962	0.00757645	0.00757544	0.534567	5.38712e-18	5.69654e-43	3.60228e-11	1
SLE_Bentham_2015	chr7	128945562	rs35000415	LCL	TNPO3	0.000456345	310	128846309	129045409	14.1502	3.95846	93.0149	1.06915	90.6352	94.0838	0.00796813	0.00763454	0.00765959	0.530606	0.00512772	5.75209e-43	0.000456345	0.994416
SLE_Bentham_2015	chr8	10727132	rs11774893	LCL	PINX1	0.998007	636	10627320	10826912	4.98606	4.65705	5.59871	4.32467	11.9127	9.91296	0.00759659	0.0075944	0.533264	0.00771397	2.57446e-05	7.19872e-06	0.998007	0.00195435
SLE_Bentham_2015	chr8	11157106	rs34208825	LCL	ENSG00000255310	0.0046482	470	11057497	11257057	5.65068	10.5488	9.67947	46.0747	54.593	55.7533	0.00762182	0.00762005	0.00791816	0.531367	1.39646e-22	8.93658e-07	0.0046482	0.995351
SLE_Bentham_2015	chr8	11157106	rs34208825	LCL	ENSG00000269918	0.00257545	470	11057497	11257057	5.65068	9.1257	9.67947	33.0307	40.9797	42.7097	0.00758887	0.00760495	0.00776126	0.532838	6.42099e-17	8.90936e-07	0.00257545	0.997424
SLE_Bentham_2015	chr8	11482456	rs2736332	LCL	BLK	0.000526752	652	11383062	11582452	8.65722	14.7188	28.5717	97.9662	123.241	126.538	0.00758124	0.00758206	0.00760944	0.534181	4.03331e-45	5.53831e-15	0.000526752	0.999473
SLE_Bentham_2015	chr8	11482456	rs2736332	LCL	ENSG00000269954	0.00325706	652	11383062	11582452	8.65722	11.9361	28.5717	61.2397	88.3079	89.8111	0.00759964	0.00760743	0.00782399	0.532524	3.60631e-29	5.56004e-15	0.00325706	0.996743
SLE_Bentham_2015	chr8	11482456	rs2736332	LCL	FAM167A	9.12406e-05	652	11383062	11582452	8.65722	20.828	28.5717	205.615	229.14	234.187	0.00757378	0.00757892	0.00758573	0.534513	7.13958e-92	5.5348e-15	9.12406e-05	0.999909
SLE_Bentham_2015	chr8	11482456	rs2736332	LCL	GATA4	0.998724	652	11383062	11582452	8.65722	4.24225	28.5717	2.83503	33.8705	31.3928	0.00759677	0.0075895	0.533617	0.00766777	7.105e-05	4.71927e-16	0.998724	0.00120454
SLE_Bentham_2015	chr10	48817351	rs7097397	LCL	ENSG00000228403	0.996868	522	48717378	48917088	6.48967	5.61569	12.0665	9.38196	22.9815	21.4397	0.0076022	0.00760605	0.532358	0.00781537	2.58852e-07	1.76755e-08	0.996868	0.00313169
SLE_Bentham_2015	chr11	625085	rs58688157	LCL	CDHR5	0.0155094	627	525137	723429	6.64818	9.34238	15.4549	35.8604	51.2501	51.314	0.00772757	0.00772595	0.00879455	0.523695	3.87954e-18	2.82283e-09	0.0155094	0.984491
SLE_Bentham_2015	chr12	111535554	rs597808	LCL	SH2B3	0.999169	111	111437606	111634620	5.51405	4.45986	8.96957	4.19723	15.8933	13.0321	0.0075838	0.00758457	0.534045	0.00763385	1.39647e-05	1.18161e-07	0.999169	0.000817025
SLE_Bentham_2015	chr17	39850937	rs143123127	LCL	GSDMB	0.983309	182	39751379	39950842	5.01563	14.6134	7.32904	100.304	107.629	107.626	0.00773378	0.00773322	0.522991	0.00889251	4.00876e-46	9.58414e-06	0.983309	0.0166811
SLE_Bentham_2015	chr19	55251894	rs73068668	LCL	PPP6R1	0.999923	396	55153585	55350136	5.47416	6.23929	6.34624	11.467	22.6617	17.4487	0.00756923	0.00757439	0.534553	0.00758112	1.16223e-09	1.94759e-07	0.999923	7.72143e-05
UC_deLange_2017	chr1	2565210	rs7544646	LCL	TNFRSF14	0.984411	310	2465316	2650901	7.3	14.1558	18.249	91.4339	109.738	109.678	0.00772176	0.00772621	0.5237	0.00879979	2.68425e-42	1.63265e-10	0.984411	0.0155893
UC_deLange_2017	chr1	2565210	rs7544646	LCL	TNFRSF14-AS1	0.995485	310	2465316	2650901	7.3	9.10956	18.249	34.175	53.5998	52.4107	0.00761759	0.00761954	0.531429	0.00791532	6.33488e-18	5.22923e-11	0.995485	0.00451472
UC_deLange_2017	chr1	8120150	rs7523335	LCL	ENSG00000284747	0.996944	405	8020685	8220121	6.62201	8.71546	15.8641	30.8695	48.2818	46.7174	0.00759388	0.00761389	0.532499	0.00780306	1.18574e-16	3.90754e-10	0.996944	0.00305635
UC_deLange_2017	chr1	8120150	rs7523335	LCL	PARK7	0.997793	405	8020685	8220121	6.62201	4.89769	15.8641	6.6622	24.3957	22.5125	0.00759582	0.00759196	0.532971	0.00774093	2.80329e-06	2.82565e-10	0.997793	0.00220421
UC_deLange_2017	chr1	46356475	rs112124254	LCL	LURAP1	0.989971	388	46256717	46456330	5.14286	4.5624	5.52181	6.12908	12.097	11.6462	0.00767306	0.0076767	0.527661	0.0083383	2.00762e-05	3.6866e-05	0.989971	0.0099675
UC_deLange_2017	chr1	46356475	rs112124254	LCL	NSUN4	2.02704e-05	388	46256717	46456330	5.14286	26.7929	5.52181	348.073	347.046	353.595	0.0075758	0.00758166	0.00757273	0.534545	9.66295e-154	5.67102e-05	2.02704e-05	0.999923
UC_deLange_2017	chr1	150706557	rs1336900	LCL	HORMAD1	0.996604	280	150607202	150805089	5.44172	4.52801	6.58527	5.88571	13.9178	12.4513	0.0076034	0.00760579	0.532197	0.00782494	9.31062e-06	4.62702e-06	0.996604	0.0033811
UC_deLange_2017	chr1	155192276	rs4072037	LCL	SCAMP3	0.00792762	242	155092683	155290592	5.23457	4.4204	6.98879	5.3836	11.7113	12.3706	0.00765924	0.00765386	0.00817408	0.528997	6.60591e-05	1.32588e-05	0.00792762	0.991989
UC_deLange_2017	chr1	155192276	rs4072037	LCL	THBS3	0.99765	242	155092683	155290592	5.23457	6.57959	6.98879	14.2792	23.0577	21.2369	0.00759538	0.0075984	0.532872	0.00774669	1.49376e-09	2.19095e-06	0.99765	0.00234818
UC_deLange_2017	chr2	101997084	rs13022757	LCL	IL1R2	0.999244	420	101897762	102096596	5.28025	7.96197	7.02018	24.26	34.1544	31.2147	0.00757885	0.0075864	0.534036	0.00763231	2.33062e-14	7.1622e-07	0.999244	0.000755234
UC_deLange_2017	chr3	49075651	rs34660653	LCL	SLC26A6	0.996441	112	48975943	49175597	6.31837	5.53058	14.2482	10.5384	26.1647	24.7481	0.0076132	0.00761354	0.532074	0.00783569	9.52316e-08	2.33176e-09	0.996441	0.00355911
UC_deLange_2017	chr3	49676792	rs1131095	LCL	APEH	0.998683	215	49578191	49776393	9.48214	6.7531	38.688	17.573	58.6024	56.2146	0.00758495	0.00758493	0.533727	0.00766258	3.18656e-11	2.15382e-20	0.998683	0.0013166
UC_deLange_2017	chr3	49676792	rs1131095	LCL	PRKAR2A	0.998426	215	49578191	49776393	9.48214	4.94676	38.688	6.3329	47.1976	44.9826	0.00759128	0.00758725	0.5334	0.00768791	2.86355e-06	2.54121e-20	0.998426	0.00157082
UC_deLange_2017	chr3	49921715	rs35275715	LCL	UBA7	0.00440693	241	49823245	50021177	6.5375	5.45685	14.7669	9.18074	22.735	23.9466	0.00761233	0.00761698	0.00790232	0.531492	1.47031e-06	5.51604e-09	0.00440693	0.995592
UC_deLange_2017	chr3	50127668	rs2624848	LCL	RBM6	0.00315845	232	50027841	50223036	5.89937	16.4096	11.4619	127.909	137.837	139.369	0.00760713	0.0076007	0.00780727	0.532365	4.01928e-58	1.50002e-07	0.00315845	0.996841
UC_deLange_2017	chr5	177363161	rs67111717	LCL	RGS14	0.999118	179	177264278	177462529	5.52047	5.01287	8.86805	6.5808	18.1646	15.3772	0.00758294	0.00757915	0.533945	0.00764324	1.30179e-06	1.32125e-07	0.999118	0.000880775
UC_deLange_2017	chr6	111210955	rs71562284	LCL	MFSD4B	0.999659	287	111112378	111310704	6.1195	7.35844	10.3718	20.0776	34.0515	30.3204	0.0075757	0.00757988	0.534328	0.00759414	7.37103e-13	1.21046e-08	0.999659	0.000340506
UC_deLange_2017	chr7	2749278	rs798506	LCL	AMZ1	0.995706	529	2649377	2848423	6.73743	5.28255	15.0712	8.00059	24.3022	23.0645	0.00761326	0.00761731	0.531576	0.00790058	1.39685e-06	1.18758e-09	0.995706	0.00429216
UC_deLange_2017	chr7	2749278	rs798506	LCL	GNA12	0.00468332	529	2649377	2848423	6.73743	23.765	15.0712	272.136	286.052	287.206	0.00761958	0.00762118	0.00792682	0.531245	9.28533e-121	4.07302e-09	0.00468332	0.995317
UC_deLange_2017	chr7	73748107	rs11981405	LCL	METTL27	0.00756092	327	73649185	73847487	5.23464	23.7045	7.66088	271.504	278.458	279.161	0.00765186	0.00765153	0.00814495	0.529274	1.76186e-120	6.78321e-06	0.00756092	0.992432
UC_deLange_2017	chr7	128933913	rs4728142	LCL	IRF5	0.00114518	313	128835777	129033838	6.29747	9.43683	11.4399	35.4956	44.4078	46.9351	0.00758348	0.00758941	0.00766155	0.533786	5.45306e-18	1.5284e-07	0.00114518	0.998855
UC_deLange_2017	chr7	128933913	rs4728142	LCL	TNPO3	0.999068	313	128835777	129033838	6.29747	3.95846	11.4399	1.11023	15.5265	12.501	0.00760091	0.00758517	0.533848	0.00763149	0.00023891	7.78443e-09	0.999068	0.000693125
UC_deLange_2017	chr9	136378050	rs3812565	LCL	CARD9	0.000338109	343	136324456	136478000	8.34375	8.94319	27.8171	31.8344	55.9133	59.6515	0.0075757	0.00757988	0.00759414	0.534328	2.11829e-16	1.17737e-14	0.000338109	0.999662
UC_deLange_2017	chr9	136378050	rs3812565	LCL	SNAPC4	0.000522625	343	136324456	136478000	8.34375	5.03448	27.8171	5.00657	29.5179	32.8236	0.00758626	0.00758247	0.0076177	0.534175	9.50135e-05	1.17777e-14	0.000522625	0.999382
UC_deLange_2017	chr11	1852842	rs907611	LCL	LSP1	0.999639	451	1752906	1944876	5.26627	6.30091	7.04007	11.3032	21.9304	18.2564	0.00757993	0.00757943	0.534328	0.00760528	4.84059e-09	3.43829e-07	0.999639	0.000361037
UC_deLange_2017	chr11	58409447	rs12283414	LCL	ZFP91	0.995967	471	58309487	58506897	5	6.49015	6.97345	15.5549	23.819	22.5211	0.00760906	0.00761174	0.531812	0.00787844	6.88454e-10	3.67209e-06	0.995967	0.00402952
UC_deLange_2017	chr16	28478021	rs28374519	LCL	SULT1A1	0.995434	138	28462144	28577122	5.36782	4.48802	8.30181	4.5361	13.9979	12.81	0.00762399	0.0076172	0.531356	0.00790862	4.79746e-05	1.10968e-06	0.995434	0.00451665
UC_deLange_2017	chr16	28478021	rs28374519	LCL	TUFM	0.989636	138	28462144	28577122	5.36782	4.69735	8.30181	5.80171	14.5139	14.0954	0.00767453	0.00766904	0.527353	0.00836709	2.88778e-05	2.36852e-06	0.989636	0.0103323
UC_deLange_2017	chr16	30482560	rs11150590	LCL	SEPHS2	0.999166	170	30383220	30581738	4.96023	5.71921	6.24357	8.93165	17.9289	15.0857	0.00758376	0.0075811	0.534068	0.00763516	1.19416e-07	1.75522e-06	0.999166	0.000831912
UC_deLange_2017	chr17	39887396	rs12936409	LCL	GRB7	0.998021	276	39793671	39987295	8.63924	4.38472	31.0854	5.10421	38.1571	36.1624	0.00758862	0.00759038	0.533232	0.00772271	1.20547e-05	6.27747e-17	0.998021	0.00196646
UC_deLange_2017	chr17	39887396	rs12936409	LCL	IKZF3	0.99862	276	39793671	39987295	8.63924	5.9779	31.0854	11.7244	45.1204	42.7769	0.00759264	0.00759006	0.53353	0.00767839	1.14106e-08	4.4546e-17	0.99862	0.00137954
UC_deLange_2017	chr17	40619224	rs9911533	LCL	CCR7	0.998879	195	40523355	40719056	5.39634	4.61331	8.55923	4.81007	15.8666	13.31	0.00758869	0.00758625	0.533803	0.00765657	9.52218e-06	2.24056e-07	0.998879	0.00111127
UC_deLange_2017	chr20	63697746	rs6062496	LCL	ARFRP1	0.999288	585	63597891	63796751	8.33742	4.60272	25.2837	5.04545	33.3054	30.3002	0.00758192	0.00758112	0.534031	0.00763129	4.65746e-06	7.56351e-15	0.999288	0.000707296
UC_deLange_2017	chr22	29857267	rs4993442	LCL	ZMAT5	0.994854	350	29757666	29957105	5.51955	5.28735	9.5664	6.37667	16.9998	15.9337	0.00762775	0.00762686	0.530891	0.00796192	8.44974e-06	3.47946e-07	0.994854	0.00513743
UC_deLange_2017	chr22	30065753	rs12171061	LCL	ASCC2	0.995983	282	29965892	30163691	5.50562	9.20894	9.67436	35.4858	46.4404	45.1403	0.00760933	0.00761543	0.531844	0.00787032	1.53653e-18	2.49255e-07	0.995983	0.0040167
UC_deLange_2017	chr22	30065753	rs12171061	LCL	UQCR10	0.997734	282	29965892	30163691	5.50562	7.36489	9.67436	21.3143	32.8143	30.9597	0.00759467	0.00759752	0.533009	0.00773373	1.26831e-12	1.44067e-07	0.997734	0.00226585
UC_deLange_2017	chr22	39266475	rs9611131	LCL	ENSG00000284633	0.00236226	584	39167203	39365250	6.5815	5.77685	13.2356	9.66847	21.089	22.9037	0.00759419	0.00759814	0.00774926	0.533056	8.99231e-07	2.54038e-08	0.00236226	0.997637
UC_deLange_2017	chr22	39266475	rs9611131	LCL	PDGFB	0.012492	584	39167203	39365250	6.5815	6.67842	13.2356	14.8155	27.7989	28.0492	0.00769566	0.00768966	0.00854359	0.525834	5.32686e-09	2.58371e-08	0.012492	0.987508

## Sheet: Table C
Table C. Transcription factors and other proteins detected in colocalized caQTL peaks based on ChIP-seq data
chrom	start	end	ATAC_peak	TF	CellType
chr1	1847693	1848321	ATAC_chr1_1847693_1848321	BATF	B Lymphocyte
chr1	1847693	1848321	ATAC_chr1_1847693_1848321	BCLAF1	B Lymphocyte
chr1	1847693	1848321	ATAC_chr1_1847693_1848321	BHLHE40	B Lymphocyte
chr1	1847693	1848321	ATAC_chr1_1847693_1848321	BRD4	Leukemia Cell, Lymphoblastoid
chr1	1847693	1848321	ATAC_chr1_1847693_1848321	CBX5	B Lymphocyte
chr1	1847693	1848321	ATAC_chr1_1847693_1848321	CDK9	Acute myeloid leukemia
chr1	1847693	1848321	ATAC_chr1_1847693_1848321	CREBBP	B Lymphocyte
chr1	1847693	1848321	ATAC_chr1_1847693_1848321	CTCF	Lymphoblastoid
chr1	1847693	1848321	ATAC_chr1_1847693_1848321	EBF1	B Lymphocyte
chr1	1847693	1848321	ATAC_chr1_1847693_1848321	EBNA3	B Lymphocyte
chr1	1847693	1848321	ATAC_chr1_1847693_1848321	EED	B Lymphocyte
chr1	1847693	1848321	ATAC_chr1_1847693_1848321	ELF1	B Lymphocyte
chr1	1847693	1848321	ATAC_chr1_1847693_1848321	EP300	B Lymphocyte
chr1	1847693	1848321	ATAC_chr1_1847693_1848321	IKZF1	B Lymphocyte
chr1	1847693	1848321	ATAC_chr1_1847693_1848321	IRF4	B Lymphocyte
chr1	1847693	1848321	ATAC_chr1_1847693_1848321	JUNB	B Lymphocyte
chr1	1847693	1848321	ATAC_chr1_1847693_1848321	KMT2A	Monocyte
chr1	1847693	1848321	ATAC_chr1_1847693_1848321	MAX	Erythroblast, B Lymphocyte, B cell lymphoma
chr1	1847693	1848321	ATAC_chr1_1847693_1848321	MED1	B Lymphocyte
chr1	1847693	1848321	ATAC_chr1_1847693_1848321	MEF2A	B Lymphocyte
chr1	1847693	1848321	ATAC_chr1_1847693_1848321	MLLT1	Acute myeloid leukemia, B Lymphocyte
chr1	1847693	1848321	ATAC_chr1_1847693_1848321	MTA2	B Lymphocyte
chr1	1847693	1848321	ATAC_chr1_1847693_1848321	MTA3	B Lymphocyte
chr1	1847693	1848321	ATAC_chr1_1847693_1848321	MXI1	B Lymphocyte
chr1	1847693	1848321	ATAC_chr1_1847693_1848321	MYC	B Lymphocyte, B cell lymphoma
chr1	1847693	1848321	ATAC_chr1_1847693_1848321	NFIC	B Lymphocyte
chr1	1847693	1848321	ATAC_chr1_1847693_1848321	NIPBL	B Lymphocyte
chr1	1847693	1848321	ATAC_chr1_1847693_1848321	POLR2A	B Lymphocyte
chr1	1847693	1848321	ATAC_chr1_1847693_1848321	RBPJ	Lymphoblastoid
chr1	1847693	1848321	ATAC_chr1_1847693_1848321	RELA	Lymphoblastoid
chr1	1847693	1848321	ATAC_chr1_1847693_1848321	RUNX1	AML cell
chr1	1847693	1848321	ATAC_chr1_1847693_1848321	RUNX3	B Lymphocyte
chr1	1847693	1848321	ATAC_chr1_1847693_1848321	SMARCA4	CD36 Cell
chr1	1847693	1848321	ATAC_chr1_1847693_1848321	SMC1A	B Lymphocyte
chr1	1847693	1848321	ATAC_chr1_1847693_1848321	SP1	B Lymphocyte
chr1	1847693	1848321	ATAC_chr1_1847693_1848321	SPI1	Monocyte, B Lymphocyte, Lymphoblastoid, Macrophage
chr1	1847693	1848321	ATAC_chr1_1847693_1848321	SPIB	B Lymphocyte
chr1	1847693	1848321	ATAC_chr1_1847693_1848321	STAG1	Lymphoblastoid, B Lymphocyte
chr1	1847693	1848321	ATAC_chr1_1847693_1848321	STAT1	Monocyte
chr1	1847693	1848321	ATAC_chr1_1847693_1848321	TARDBP	B Lymphocyte
chr1	1847693	1848321	ATAC_chr1_1847693_1848321	TBX21	B Lymphocyte
chr1	1847693	1848321	ATAC_chr1_1847693_1848321	TCF12	B Lymphocyte
chr1	1847693	1848321	ATAC_chr1_1847693_1848321	TCF4	Plasmacytoid dendritic cell, Dendritic Cell
chr1	1847693	1848321	ATAC_chr1_1847693_1848321	TRIM22	B Lymphocyte
chr1	1847693	1848321	ATAC_chr1_1847693_1848321	TRIM28	Hematopoietic Stem Cell
chr1	1847693	1848321	ATAC_chr1_1847693_1848321	USF2	B Lymphocyte
chr1	1847693	1848321	ATAC_chr1_1847693_1848321	ZBTB40	B Lymphocyte
chr1	1847693	1848321	ATAC_chr1_1847693_1848321	ZEB2	Erythroblast
chr1	2554629	2557863	ATAC_chr1_2554629_2557863	ADNP	Erythroblast
chr1	2554629	2557863	ATAC_chr1_2554629_2557863	AFF1	B Lymphocyte
chr1	2554629	2557863	ATAC_chr1_2554629_2557863	ARID5B	T Lymphocyte
chr1	2554629	2557863	ATAC_chr1_2554629_2557863	ATF2	B Lymphocyte
chr1	2554629	2557863	ATAC_chr1_2554629_2557863	ATF3	B Lymphocyte, Erythroblast
chr1	2554629	2557863	ATAC_chr1_2554629_2557863	BACH2	B Lymphocyte
chr1	2554629	2557863	ATAC_chr1_2554629_2557863	BATF	B Lymphocyte
chr1	2554629	2557863	ATAC_chr1_2554629_2557863	BCL11A	B Lymphocyte
chr1	2554629	2557863	ATAC_chr1_2554629_2557863	BCL3	B Lymphocyte
chr1	2554629	2557863	ATAC_chr1_2554629_2557863	BCL6	Haematopoietic Progenitor Cell, B Lymphocyte, Pre-B Lymphocyte, T Lymphocyte, B cell lymphoma
chr1	2554629	2557863	ATAC_chr1_2554629_2557863	BCLAF1	B Lymphocyte
chr1	2554629	2557863	ATAC_chr1_2554629_2557863	BCOR	B Lymphocyte, B cell lymphoma, Erythroblast
chr1	2554629	2557863	ATAC_chr1_2554629_2557863	BHLHE40	B Lymphocyte, Erythroblast
chr1	2554629	2557863	ATAC_chr1_2554629_2557863	BMI1	Erythroblast
chr1	2554629	2557863	ATAC_chr1_2554629_2557863	BRD2	B Lymphocyte
chr1	2554629	2557863	ATAC_chr1_2554629_2557863	BRD3	B Lymphocyte
chr1	2554629	2557863	ATAC_chr1_2554629_2557863	BRD4	T Lymphoblast, T Lymphocyte, Embryonic Stem Cell, B cell lymphoma, Leukemia Cell, Th1, Lymphoblastoid, Myeloid Cell, Plasma Cell, B Lymphocyte, Acute myeloid leukemia, Erythroblast, Plasmacytoid dendritic cell
chr1	2554629	2557863	ATAC_chr1_2554629_2557863	CBFB	Myeloblast, Leukemia Cell, B Lymphocyte
chr1	2554629	2557863	ATAC_chr1_2554629_2557863	CBX1	Erythroblast
chr1	2554629	2557863	ATAC_chr1_2554629_2557863	CBX3	Erythroblast
chr1	2554629	2557863	ATAC_chr1_2554629_2557863	CBX5	B Lymphocyte
chr1	2554629	2557863	ATAC_chr1_2554629_2557863	CDK7	T Lymphocyte, B Lymphocyte
chr1	2554629	2557863	ATAC_chr1_2554629_2557863	CDK8	Myeloid Cell, Macrophage, Megakaryoblastic
chr1	2554629	2557863	ATAC_chr1_2554629_2557863	CDK9	Plasma Cell, Th1, Acute myeloid leukemia, Th2, T Lymphoblast, B Lymphocyte
chr1	2554629	2557863	ATAC_chr1_2554629_2557863	CEBPA	B Lymphocyte, Erythroblast
chr1	2554629	2557863	ATAC_chr1_2554629_2557863	CEBPB	Leukemia Cell, B Lymphocyte, Erythroblast
chr1	2554629	2557863	ATAC_chr1_2554629_2557863	CENPT	Lymphoblastoid
chr1	2554629	2557863	ATAC_chr1_2554629_2557863	CHAMP1	Erythroblast
chr1	2554629	2557863	ATAC_chr1_2554629_2557863	CHD1	B Lymphocyte
chr1	2554629	2557863	ATAC_chr1_2554629_2557863	CHD2	B Lymphocyte
chr1	2554629	2557863	ATAC_chr1_2554629_2557863	CHD8	iPSC
chr1	2554629	2557863	ATAC_chr1_2554629_2557863	CREB1	B Lymphocyte
chr1	2554629	2557863	ATAC_chr1_2554629_2557863	CREB3	Erythroblast
chr1	2554629	2557863	ATAC_chr1_2554629_2557863	CREBBP	B Lymphocyte, T Lymphocyte
chr1	2554629	2557863	ATAC_chr1_2554629_2557863	CTCF	Lymphoblastoid, T Lymphocyte, Hematopoietic stem and progenitor cell, B Lymphocyte, Embryonic Stem Cell, Erythroblast, Monocyte, Macrophage, Leukemia, Erythroid Cell, B Lymphoblast, Proerythroblast, Erythroid Progenitor Cell, B cell lymphoma, Stromal Cell, Haematopoietic Progenitor Cell, Hematopoietic Stem Cell, Lymphocyte
chr1	2554629	2557863	ATAC_chr1_2554629_2557863	CTCFL	Erythroblast
chr1	2554629	2557863	ATAC_chr1_2554629_2557863	CUX1	Erythroblast, B Lymphocyte
chr1	2554629	2557863	ATAC_chr1_2554629_2557863	DPF2	Erythroblast
chr1	2554629	2557863	ATAC_chr1_2554629_2557863	DRAP1	B Lymphocyte
chr1	2554629	2557863	ATAC_chr1_2554629_2557863	E2F5	Erythroblast
chr1	2554629	2557863	ATAC_chr1_2554629_2557863	E2F6	Erythroblast
chr1	2554629	2557863	ATAC_chr1_2554629_2557863	EBF1	B Lymphocyte, Lymphoblastoid
chr1	2554629	2557863	ATAC_chr1_2554629_2557863	EBNA2	B Lymphocyte
chr1	2554629	2557863	ATAC_chr1_2554629_2557863	EED	B Lymphocyte
chr1	2554629	2557863	ATAC_chr1_2554629_2557863	EGR1	B Lymphocyte, Erythroblast
chr1	2554629	2557863	ATAC_chr1_2554629_2557863	ELF1	B Lymphocyte, Leukemia Cell, Erythroblast
chr1	2554629	2557863	ATAC_chr1_2554629_2557863	ELK1	B Lymphocyte, Erythroblast
chr1	2554629	2557863	ATAC_chr1_2554629_2557863	EOMES	Embryonic Stem Cell
chr1	2554629	2557863	ATAC_chr1_2554629_2557863	EP300	Embryonic Stem Cell, Leukemia Cell, T Lymphocyte, Pre-B Lymphocyte, B Lymphocyte, Erythroid Cell, Myeloblast, Stem cell, B cell lymphoma
chr1	2554629	2557863	ATAC_chr1_2554629_2557863	EPAS1	Macrophage
chr1	2554629	2557863	ATAC_chr1_2554629_2557863	ERG	Acute myeloid leukemia, Myeloblast, Leukemia Cell, Hematopoietic Cell, T Lymphocyte, Haematopoietic Progenitor Cell
chr1	2554629	2557863	ATAC_chr1_2554629_2557863	ESRRA	B Lymphocyte
chr1	2554629	2557863	ATAC_chr1_2554629_2557863	ETS1	T Lymphocyte, B Lymphocyte
chr1	2554629	2557863	ATAC_chr1_2554629_2557863	ETV1	Erythroblast
chr1	2554629	2557863	ATAC_chr1_2554629_2557863	ETV6	B Lymphocyte
chr1	2554629	2557863	ATAC_chr1_2554629_2557863	EZH1	Proerythroblast
chr1	2554629	2557863	ATAC_chr1_2554629_2557863	EZH2	Multiple myeloma, Multiple myeloma cell
chr1	2554629	2557863	ATAC_chr1_2554629_2557863	FAIRE	Macrophage
chr1	2554629	2557863	ATAC_chr1_2554629_2557863	FAM208A	Leukemia
chr1	2554629	2557863	ATAC_chr1_2554629_2557863	FLI1	Myeloblast, Haematopoietic Progenitor Cell, Acute myeloid leukemia
chr1	2554629	2557863	ATAC_chr1_2554629_2557863	FOS	B Lymphocyte
chr1	2554629	2557863	ATAC_chr1_2554629_2557863	FOSL1	Erythroblast
chr1	2554629	2557863	ATAC_chr1_2554629_2557863	FOXK2	Erythroblast
chr1	2554629	2557863	ATAC_chr1_2554629_2557863	FOXM1	B Lymphocyte
chr1	2554629	2557863	ATAC_chr1_2554629_2557863	FOXP1	Embryonic Stem Cell, B Lymphocyte
chr1	2554629	2557863	ATAC_chr1_2554629_2557863	GABPA	T Lymphocyte, Embryonic Stem Cell, B Lymphocyte, Haematopoietic Progenitor Cell, Erythroblast
chr1	2554629	2557863	ATAC_chr1_2554629_2557863	GATA1	Erythroid Cell, Hematopoietic stem and progenitor cell, Erythroblast, Proerythroblast
chr1	2554629	2557863	ATAC_chr1_2554629_2557863	GATA2	Erythroblast, Haematopoietic Progenitor Cell, Erythroid progenitor
chr1	2554629	2557863	ATAC_chr1_2554629_2557863	GATA3	T Lymphocyte, Th1, Th2
chr1	2554629	2557863	ATAC_chr1_2554629_2557863	GLI2	Leukemia Cell
chr1	2554629	2557863	ATAC_chr1_2554629_2557863	H2AZ	Macrophage, B Lymphocyte, Monocyte, T Lymphocyte, CD14 cell, Erythroblast, Proerythroblast, Haematopoietic Progenitor Cell, Embryonic Stem Cell
chr1	2554629	2557863	ATAC_chr1_2554629_2557863	HDAC1	Leukemia Cell, B cell precursor, Erythroid progenitor, B Lymphocyte, Acute myeloid leukemia, Erythroblast
chr1	2554629	2557863	ATAC_chr1_2554629_2557863	HDAC2	Erythroid progenitor, Acute myeloid leukemia, B Lymphocyte, Erythroblast
chr1	2554629	2557863	ATAC_chr1_2554629_2557863	HDAC4	B Lymphocyte
chr1	2554629	2557863	ATAC_chr1_2554629_2557863	HDAC8	Erythroblast
chr1	2554629	2557863	ATAC_chr1_2554629_2557863	HDGF	B Lymphocyte, Erythroblast
chr1	2554629	2557863	ATAC_chr1_2554629_2557863	HEY1	Erythroblast
chr1	2554629	2557863	ATAC_chr1_2554629_2557863	HIF1A	Macrophage
chr1	2554629	2557863	ATAC_chr1_2554629_2557863	HINFP	Erythroblast
chr1	2554629	2557863	ATAC_chr1_2554629_2557863	HMG20A	B Lymphocyte
chr1	2554629	2557863	ATAC_chr1_2554629_2557863	HMGN1	T Lymphocyte
chr1	2554629	2557863	ATAC_chr1_2554629_2557863	HSF1	Leukemia Cell
chr1	2554629	2557863	ATAC_chr1_2554629_2557863	ID3	Erythroblast
chr1	2554629	2557863	ATAC_chr1_2554629_2557863	IKZF1	B Lymphocyte, B cell precursor, Erythroblast
chr1	2554629	2557863	ATAC_chr1_2554629_2557863	IRF1	Monocyte, Erythroblast
chr1	2554629	2557863	ATAC_chr1_2554629_2557863	IRF2	Hematopoietic stem and progenitor cell, Proerythroblast
chr1	2554629	2557863	ATAC_chr1_2554629_2557863	IRF4	B Lymphocyte
chr1	2554629	2557863	ATAC_chr1_2554629_2557863	IRF5	Monocyte
chr1	2554629	2557863	ATAC_chr1_2554629_2557863	JMJD1C	Monocyte, Myeloblast
chr1	2554629	2557863	ATAC_chr1_2554629_2557863	JUN	Erythroblast
chr1	2554629	2557863	ATAC_chr1_2554629_2557863	JUNB	B Lymphocyte
chr1	2554629	2557863	ATAC_chr1_2554629_2557863	JUND	Erythroblast
chr1	2554629	2557863	ATAC_chr1_2554629_2557863	KAT5	T Lymphocyte
chr1	2554629	2557863	ATAC_chr1_2554629_2557863	KDM1A	Myeloblast, Erythroblast
chr1	2554629	2557863	ATAC_chr1_2554629_2557863	KDM2B	B Lymphocyte, B cell lymphoma, Leukemia Cell, hESC
chr1	2554629	2557863	ATAC_chr1_2554629_2557863	KDM4A	Embryonic Stem Cell
chr1	2554629	2557863	ATAC_chr1_2554629_2557863	KDM5B	Erythroblast
chr1	2554629	2557863	ATAC_chr1_2554629_2557863	KDM6B	T Lymphocyte
chr1	2554629	2557863	ATAC_chr1_2554629_2557863	KLF1	Erythroid Cell
chr1	2554629	2557863	ATAC_chr1_2554629_2557863	KMT2A	Leukemia Cell, Monocyte, B Lymphocyte, Pre-B Lymphocyte
chr1	2554629	2557863	ATAC_chr1_2554629_2557863	L3MBTL2	Erythroblast
chr1	2554629	2557863	ATAC_chr1_2554629_2557863	LARP7	Erythroblast
chr1	2554629	2557863	ATAC_chr1_2554629_2557863	LEF1	Erythroblast
chr1	2554629	2557863	ATAC_chr1_2554629_2557863	LEO1	B Lymphocyte
chr1	2554629	2557863	ATAC_chr1_2554629_2557863	LMO1	T Lymphocyte
chr1	2554629	2557863	ATAC_chr1_2554629_2557863	LMO2	Myeloblast
chr1	2554629	2557863	ATAC_chr1_2554629_2557863	MAF	Th2, Th1
chr1	2554629	2557863	ATAC_chr1_2554629_2557863	MAFK	B Lymphocyte, B cell lymphoma
chr1	2554629	2557863	ATAC_chr1_2554629_2557863	MAX	B cell lymphoma, Erythroblast, B Lymphocyte, Embryonic Stem Cell
chr1	2554629	2557863	ATAC_chr1_2554629_2557863	MAZ	B Lymphocyte, Erythroblast
chr1	2554629	2557863	ATAC_chr1_2554629_2557863	MED1	T Lymphocyte, B Lymphocyte, B cell lymphoma, Myeloid Cell, Plasma Cell
chr1	2554629	2557863	ATAC_chr1_2554629_2557863	MED12	Progenitor Cells
chr1	2554629	2557863	ATAC_chr1_2554629_2557863	MEF2A	B Lymphocyte
chr1	2554629	2557863	ATAC_chr1_2554629_2557863	MEF2D	Erythroblast
chr1	2554629	2557863	ATAC_chr1_2554629_2557863	MEIS1	Pre-B Lymphocyte
chr1	2554629	2557863	ATAC_chr1_2554629_2557863	MLLT1	B Lymphocyte, Acute myeloid leukemia, Erythroblast
chr1	2554629	2557863	ATAC_chr1_2554629_2557863	MTA2	B Lymphocyte, Erythroblast
chr1	2554629	2557863	ATAC_chr1_2554629_2557863	MTA3	B Lymphocyte
chr1	2554629	2557863	ATAC_chr1_2554629_2557863	MXI1	B Lymphocyte
chr1	2554629	2557863	ATAC_chr1_2554629_2557863	MYB	Th1, T Lymphocyte, T Lymphoblast, Th2
chr1	2554629	2557863	ATAC_chr1_2554629_2557863	MYC	B Lymphocyte, B cell lymphoma, Erythroblast, Hematopoietic stem and progenitor cell, T Lymphocyte
chr1	2554629	2557863	ATAC_chr1_2554629_2557863	MYH11	Leukemia Cell, Hematopoietic Cell
chr1	2554629	2557863	ATAC_chr1_2554629_2557863	NBN	B Lymphocyte
chr1	2554629	2557863	ATAC_chr1_2554629_2557863	NCOA1	Erythroblast
chr1	2554629	2557863	ATAC_chr1_2554629_2557863	NCOR1	Myeloblast
chr1	2554629	2557863	ATAC_chr1_2554629_2557863	NCOR2	B Lymphocyte, B cell lymphoma
chr1	2554629	2557863	ATAC_chr1_2554629_2557863	NELFE	Embryonic Stem Cell
chr1	2554629	2557863	ATAC_chr1_2554629_2557863	NFE2	Erythroid Cell, Proerythroblast, B Lymphocyte, Erythroid Progenitor Cell, Hematopoietic stem and progenitor cell
chr1	2554629	2557863	ATAC_chr1_2554629_2557863	NFIA	Erythroblast
chr1	2554629	2557863	ATAC_chr1_2554629_2557863	NFIC	B Lymphocyte
chr1	2554629	2557863	ATAC_chr1_2554629_2557863	NFKB1	Lymphoblastoid
chr1	2554629	2557863	ATAC_chr1_2554629_2557863	NFRKB	Erythroblast
chr1	2554629	2557863	ATAC_chr1_2554629_2557863	NIPBL	Embryonic Stem Cell, Lymphoblastoid, B Lymphocyte
chr1	2554629	2557863	ATAC_chr1_2554629_2557863	NKRF	Erythroblast
chr1	2554629	2557863	ATAC_chr1_2554629_2557863	NOTCH1	T Lymphocyte, Haematopoietic Progenitor Cell
chr1	2554629	2557863	ATAC_chr1_2554629_2557863	NR2C2	Erythroblast
chr1	2554629	2557863	ATAC_chr1_2554629_2557863	NR2F1	Erythroblast
chr1	2554629	2557863	ATAC_chr1_2554629_2557863	NR2F2	Stromal Cell, Erythroblast
chr1	2554629	2557863	ATAC_chr1_2554629_2557863	NR2F6	Erythroblast
chr1	2554629	2557863	ATAC_chr1_2554629_2557863	NR3C1	B cell precursor, Monocyte, B Lymphocyte
chr1	2554629	2557863	ATAC_chr1_2554629_2557863	NR4A1	Erythroblast, Acute myeloid leukemia
chr1	2554629	2557863	ATAC_chr1_2554629_2557863	PAF1	B Lymphocyte
chr1	2554629	2557863	ATAC_chr1_2554629_2557863	PAX5	B Lymphocyte, Lymphoblastoid
chr1	2554629	2557863	ATAC_chr1_2554629_2557863	PBX1	Pre-B Lymphocyte
chr1	2554629	2557863	ATAC_chr1_2554629_2557863	PBX3	B Lymphocyte
chr1	2554629	2557863	ATAC_chr1_2554629_2557863	PHF8	Erythroblast
chr1	2554629	2557863	ATAC_chr1_2554629_2557863	PKNOX1	Erythroblast
chr1	2554629	2557863	ATAC_chr1_2554629_2557863	PML	B Lymphocyte
chr1	2554629	2557863	ATAC_chr1_2554629_2557863	POLR2A	Macrophage, Acute myeloid leukemia, Lymphoblastoid, B Lymphocyte, Proerythroblast, Th2, Th1, T Lymphocyte, Leukemia Cell, Erythroblast, Myeloid Cell, B cell lymphoma, Lymphocyte, Monocyte, Plasmacytoid dendritic cell, Lymphoblast, Myeloblast, Leukemia, T Lymphoblast, Plasma Cell, Haematopoietic Progenitor Cell, Embryonic Stem Cell
chr1	2554629	2557863	ATAC_chr1_2554629_2557863	POLR2H	Erythroblast
chr1	2554629	2557863	ATAC_chr1_2554629_2557863	POLR3D	Macrophage
chr1	2554629	2557863	ATAC_chr1_2554629_2557863	POU2F2	Lymphoblastoid, B Lymphocyte, B cell lymphoma
chr1	2554629	2557863	ATAC_chr1_2554629_2557863	PSIP1	Leukemia Cell
chr1	2554629	2557863	ATAC_chr1_2554629_2557863	RAD21	B Lymphocyte, Embryonic Stem Cell, Erythroblast, Monocyte
chr1	2554629	2557863	ATAC_chr1_2554629_2557863	RAD51	Erythroblast
chr1	2554629	2557863	ATAC_chr1_2554629_2557863	RBBP5	Erythroblast
chr1	2554629	2557863	ATAC_chr1_2554629_2557863	RBPJ	T Lymphocyte, Lymphocyte, Lymphoblastoid
chr1	2554629	2557863	ATAC_chr1_2554629_2557863	RCOR1	B Lymphocyte
chr1	2554629	2557863	ATAC_chr1_2554629_2557863	REL	Lymphoblastoid
chr1	2554629	2557863	ATAC_chr1_2554629_2557863	RELA	Monocyte, Lymphoblastoid, B Lymphocyte, Th1
chr1	2554629	2557863	ATAC_chr1_2554629_2557863	RELB	Lymphoblastoid
chr1	2554629	2557863	ATAC_chr1_2554629_2557863	REPIN1	Myeloblast
chr1	2554629	2557863	ATAC_chr1_2554629_2557863	REST	B Lymphocyte, Embryonic Stem Cell, T Lymphocyte, Erythroblast
chr1	2554629	2557863	ATAC_chr1_2554629_2557863	RFX5	B Lymphocyte
chr1	2554629	2557863	ATAC_chr1_2554629_2557863	RNF2	Erythroblast
chr1	2554629	2557863	ATAC_chr1_2554629_2557863	RUNX1	Haematopoietic Progenitor Cell, Myeloblast, Myeloid Cell, Pre-B Lymphocyte, Leukemic Blast Cell, Stem cell, Acute myeloid leukemia, Monocyte, Leukemia Cell, Leukemic cells, AML cell, T Lymphocyte, Megakaryocyte, Hematopoietic stem and progenitor cell, Erythroblast
chr1	2554629	2557863	ATAC_chr1_2554629_2557863	RUNX1T1	Myeloblast
chr1	2554629	2557863	ATAC_chr1_2554629_2557863	RUNX3	B Lymphocyte
chr1	2554629	2557863	ATAC_chr1_2554629_2557863	RXRG	Macrophage
chr1	2554629	2557863	ATAC_chr1_2554629_2557863	SAP30	Erythroblast
chr1	2554629	2557863	ATAC_chr1_2554629_2557863	SETD1A	Pre-B Lymphocyte, Erythroid Cell
chr1	2554629	2557863	ATAC_chr1_2554629_2557863	SIN3A	B Lymphocyte, Erythroblast
chr1	2554629	2557863	ATAC_chr1_2554629_2557863	SKI	Acute myeloid leukemia
chr1	2554629	2557863	ATAC_chr1_2554629_2557863	SMAD1	Haematopoietic Progenitor Cell
chr1	2554629	2557863	ATAC_chr1_2554629_2557863	SMAD3	Embryonic Stem Cell
chr1	2554629	2557863	ATAC_chr1_2554629_2557863	SMAD5	B Lymphocyte
chr1	2554629	2557863	ATAC_chr1_2554629_2557863	SMARCA4	B Lymphocyte, Erythroblast, CD36 Cell, Hematopoietic Stem Cell, Haematopoietic Progenitor Cell, Embryonic Stem Cell
chr1	2554629	2557863	ATAC_chr1_2554629_2557863	SMARCA5	Erythroblast
chr1	2554629	2557863	ATAC_chr1_2554629_2557863	SMARCB1	Embryonic Stem Cell
chr1	2554629	2557863	ATAC_chr1_2554629_2557863	SMARCC1	Embryonic Stem Cell
chr1	2554629	2557863	ATAC_chr1_2554629_2557863	SMARCE1	Erythroblast
chr1	2554629	2557863	ATAC_chr1_2554629_2557863	SMC1A	B Lymphocyte, Macrophage, B cell lymphoma, Embryonic Stem Cell, Lymphoblastoid
chr1	2554629	2557863	ATAC_chr1_2554629_2557863	SMC3	B Lymphocyte, Erythroblast, Embryonic Stem Cell
chr1	2554629	2557863	ATAC_chr1_2554629_2557863	SND1	B Lymphocyte, Lymphocyte
chr1	2554629	2557863	ATAC_chr1_2554629_2557863	SP1	B Lymphocyte
chr1	2554629	2557863	ATAC_chr1_2554629_2557863	SPI1	Macrophage, Monocyte, Hematopoietic stem and progenitor cell, B Lymphocyte, Myeloblast, Lymphoblastoid, Haematopoietic Progenitor Cell, Erythroblast
chr1	2554629	2557863	ATAC_chr1_2554629_2557863	SPIB	B Lymphocyte
chr1	2554629	2557863	ATAC_chr1_2554629_2557863	SRF	Embryonic Stem Cell, B Lymphocyte
chr1	2554629	2557863	ATAC_chr1_2554629_2557863	STAG1	Lymphoblastoid, B Lymphocyte, Erythroid Cell, Hematopoietic stem and progenitor cell
chr1	2554629	2557863	ATAC_chr1_2554629_2557863	STAT1	Monocyte, B Lymphocyte
chr1	2554629	2557863	ATAC_chr1_2554629_2557863	STAT3	B Lymphocyte, B cell lymphoma
chr1	2554629	2557863	ATAC_chr1_2554629_2557863	STAT4	Monocyte, Lymphocyte
chr1	2554629	2557863	ATAC_chr1_2554629_2557863	STAT5A	B Lymphocyte, T Lymphocyte, Lymphocyte
chr1	2554629	2557863	ATAC_chr1_2554629_2557863	STAT5B	T Lymphocyte, Lymphocyte
chr1	2554629	2557863	ATAC_chr1_2554629_2557863	STAT6	T Lymphocyte
chr1	2554629	2557863	ATAC_chr1_2554629_2557863	SUPT5H	B Lymphocyte, Leukemia, Erythroblast
chr1	2554629	2557863	ATAC_chr1_2554629_2557863	SUZ12	Proerythroblast
chr1	2554629	2557863	ATAC_chr1_2554629_2557863	T	Th1, Monocyte
chr1	2554629	2557863	ATAC_chr1_2554629_2557863	TAF1	Lymphoblastoid, B Lymphocyte, Erythroblast
chr1	2554629	2557863	ATAC_chr1_2554629_2557863	TAF7	Erythroblast
chr1	2554629	2557863	ATAC_chr1_2554629_2557863	TAL1	T Lymphoblast, Acute myeloid leukemia, T cell leukemia, Erythroblast
chr1	2554629	2557863	ATAC_chr1_2554629_2557863	TARDBP	B Lymphocyte
chr1	2554629	2557863	ATAC_chr1_2554629_2557863	TBL1XR1	B Lymphocyte
chr1	2554629	2557863	ATAC_chr1_2554629_2557863	TBP	B Lymphocyte, Erythroblast
chr1	2554629	2557863	ATAC_chr1_2554629_2557863	TBX21	B Lymphocyte, Th1
chr1	2554629	2557863	ATAC_chr1_2554629_2557863	TCF12	Embryonic Stem Cell, B Lymphocyte, T cell leukemia, Leukemia Cell, Myeloblast
chr1	2554629	2557863	ATAC_chr1_2554629_2557863	TCF4	Plasmacytoid dendritic cell
chr1	2554629	2557863	ATAC_chr1_2554629_2557863	TCF7L1	Myeloblast, B Lymphocyte, Pre-B Lymphocyte, T cell leukemia
chr1	2554629	2557863	ATAC_chr1_2554629_2557863	TCF7L2	Haematopoietic Progenitor Cell
chr1	2554629	2557863	ATAC_chr1_2554629_2557863	TEAD4	Embryonic Stem Cell, Erythroblast
chr1	2554629	2557863	ATAC_chr1_2554629_2557863	TFDP1	B Lymphocyte
chr1	2554629	2557863	ATAC_chr1_2554629_2557863	TLX1	T Lymphocyte
chr1	2554629	2557863	ATAC_chr1_2554629_2557863	TP53	Lymphoblastoid
chr1	2554629	2557863	ATAC_chr1_2554629_2557863	TRIM22	B Lymphocyte
chr1	2554629	2557863	ATAC_chr1_2554629_2557863	TRIM28	Hematopoietic Stem Cell, B Lymphocyte
chr1	2554629	2557863	ATAC_chr1_2554629_2557863	UBTF	Erythroblast
chr1	2554629	2557863	ATAC_chr1_2554629_2557863	USF1	Erythroid Cell, B Lymphocyte, Erythroblast, Embryonic Stem Cell
chr1	2554629	2557863	ATAC_chr1_2554629_2557863	USF2	B Lymphocyte, Erythroblast, Erythroid Cell
chr1	2554629	2557863	ATAC_chr1_2554629_2557863	VDR	Lymphocyte, Monocyte
chr1	2554629	2557863	ATAC_chr1_2554629_2557863	YY1	B Lymphocyte, Lymphoblastoid, Erythroblast, T Lymphocyte, Embryonic Stem Cell
chr1	2554629	2557863	ATAC_chr1_2554629_2557863	ZBED1	B Lymphocyte
chr1	2554629	2557863	ATAC_chr1_2554629_2557863	ZBTB11	Erythroblast
chr1	2554629	2557863	ATAC_chr1_2554629_2557863	ZBTB2	B Lymphocyte
chr1	2554629	2557863	ATAC_chr1_2554629_2557863	ZBTB33	B Lymphocyte
chr1	2554629	2557863	ATAC_chr1_2554629_2557863	ZBTB40	B Lymphocyte, Erythroblast
chr1	2554629	2557863	ATAC_chr1_2554629_2557863	ZBTB7A	Erythroblast, Proerythroblast
chr1	2554629	2557863	ATAC_chr1_2554629_2557863	ZC3H8	Erythroblast
chr1	2554629	2557863	ATAC_chr1_2554629_2557863	ZEB1	B Lymphocyte
chr1	2554629	2557863	ATAC_chr1_2554629_2557863	ZEB2	Erythroblast
chr1	2554629	2557863	ATAC_chr1_2554629_2557863	ZFX	Erythroblast
chr1	2554629	2557863	ATAC_chr1_2554629_2557863	ZNF143	B Lymphocyte, Erythroblast, Embryonic Stem Cell
chr1	2554629	2557863	ATAC_chr1_2554629_2557863	ZNF175	Erythroblast
chr1	2554629	2557863	ATAC_chr1_2554629_2557863	ZNF197	Erythroblast
chr1	2554629	2557863	ATAC_chr1_2554629_2557863	ZNF24	Erythroblast
chr1	2554629	2557863	ATAC_chr1_2554629_2557863	ZNF597	B Lymphocyte
chr1	2554629	2557863	ATAC_chr1_2554629_2557863	ZNF639	Erythroblast
chr1	2554629	2557863	ATAC_chr1_2554629_2557863	ZNF644	Erythroblast
chr1	2554629	2557863	ATAC_chr1_2554629_2557863	ZNF766	Erythroblast
chr1	2554629	2557863	ATAC_chr1_2554629_2557863	ZNF83	Erythroblast
chr1	2652189	2688564	ATAC_chr1_2652189_2688564	AATF	B Lymphocyte
chr1	2652189	2688564	ATAC_chr1_2652189_2688564	ADNP	Erythroblast
chr1	2652189	2688564	ATAC_chr1_2652189_2688564	AFF1	B Lymphocyte, Leukemic cells, Leukemia Cell
chr1	2652189	2688564	ATAC_chr1_2652189_2688564	AFF4	Th1
chr1	2652189	2688564	ATAC_chr1_2652189_2688564	AGO2	Erythroblast
chr1	2652189	2688564	ATAC_chr1_2652189_2688564	ARID3A	Erythroblast
chr1	2652189	2688564	ATAC_chr1_2652189_2688564	ARID5B	T Lymphocyte
chr1	2652189	2688564	ATAC_chr1_2652189_2688564	ARNT	Erythroblast
chr1	2652189	2688564	ATAC_chr1_2652189_2688564	ASCL1	Leukemia Cell
chr1	2652189	2688564	ATAC_chr1_2652189_2688564	ASH1L	Leukemia Cell
chr1	2652189	2688564	ATAC_chr1_2652189_2688564	ATF1	Erythroblast
chr1	2652189	2688564	ATAC_chr1_2652189_2688564	ATF2	B Lymphocyte
chr1	2652189	2688564	ATAC_chr1_2652189_2688564	ATF3	Erythroblast
chr1	2652189	2688564	ATAC_chr1_2652189_2688564	ATRX	Erythroblast
chr1	2652189	2688564	ATAC_chr1_2652189_2688564	BACH1	Erythroblast, Embryonic Stem Cell
chr1	2652189	2688564	ATAC_chr1_2652189_2688564	BACH2	B Lymphocyte
chr1	2652189	2688564	ATAC_chr1_2652189_2688564	BATF	B Lymphocyte
chr1	2652189	2688564	ATAC_chr1_2652189_2688564	BCL6	B Lymphocyte, Pre-B Lymphocyte, T Lymphocyte, Haematopoietic Progenitor Cell, B cell lymphoma
chr1	2652189	2688564	ATAC_chr1_2652189_2688564	BCOR	B cell lymphoma, Erythroblast, B Lymphocyte
chr1	2652189	2688564	ATAC_chr1_2652189_2688564	BHLHE40	Erythroblast, B Lymphocyte
chr1	2652189	2688564	ATAC_chr1_2652189_2688564	BMI1	Erythroblast
chr1	2652189	2688564	ATAC_chr1_2652189_2688564	BPTF	Erythroid Cell
chr1	2652189	2688564	ATAC_chr1_2652189_2688564	BRCA1	B Lymphocyte
chr1	2652189	2688564	ATAC_chr1_2652189_2688564	BRD3	Burkitt lymphoma
chr1	2652189	2688564	ATAC_chr1_2652189_2688564	BRD4	B Lymphocyte, T Lymphocyte, Leukemia Cell, Plasmacytoid dendritic cell, Erythroblast, Th1, B cell lymphoma
chr1	2652189	2688564	ATAC_chr1_2652189_2688564	BRD9	Acute myeloid leukemia
chr1	2652189	2688564	ATAC_chr1_2652189_2688564	C11orf30	Erythroblast
chr1	2652189	2688564	ATAC_chr1_2652189_2688564	CBFA2T3	Dendritic Cell
chr1	2652189	2688564	ATAC_chr1_2652189_2688564	CBFB	Leukemia Cell, B Lymphocyte
chr1	2652189	2688564	ATAC_chr1_2652189_2688564	CBX1	Erythroblast
chr1	2652189	2688564	ATAC_chr1_2652189_2688564	CBX2	Erythroblast
chr1	2652189	2688564	ATAC_chr1_2652189_2688564	CBX3	Erythroblast
chr1	2652189	2688564	ATAC_chr1_2652189_2688564	CCNT2	Erythroblast
chr1	2652189	2688564	ATAC_chr1_2652189_2688564	CD59	B Lymphocyte
chr1	2652189	2688564	ATAC_chr1_2652189_2688564	CD74	B Lymphocyte
chr1	2652189	2688564	ATAC_chr1_2652189_2688564	CDC5L	Erythroblast
chr1	2652189	2688564	ATAC_chr1_2652189_2688564	CDK8	Erythroblast, Macrophage
chr1	2652189	2688564	ATAC_chr1_2652189_2688564	CDK9	Th1, Th2
chr1	2652189	2688564	ATAC_chr1_2652189_2688564	CEBPA	B Lymphocyte
chr1	2652189	2688564	ATAC_chr1_2652189_2688564	CEBPB	Erythroblast, Embryonic Stem Cell, Monocyte
chr1	2652189	2688564	ATAC_chr1_2652189_2688564	CEBPD	Erythroblast
chr1	2652189	2688564	ATAC_chr1_2652189_2688564	CEBPG	Erythroblast
chr1	2652189	2688564	ATAC_chr1_2652189_2688564	CENPC	Lymphoblastoid
chr1	2652189	2688564	ATAC_chr1_2652189_2688564	CENPT	Lymphoblastoid
chr1	2652189	2688564	ATAC_chr1_2652189_2688564	CHAMP1	Erythroblast
chr1	2652189	2688564	ATAC_chr1_2652189_2688564	CHD1	Erythroblast, B Lymphocyte
chr1	2652189	2688564	ATAC_chr1_2652189_2688564	CHD2	Erythroblast, B Lymphocyte
chr1	2652189	2688564	ATAC_chr1_2652189_2688564	CHD7	iPSC, Erythroblast
chr1	2652189	2688564	ATAC_chr1_2652189_2688564	CHD8	iPSC
chr1	2652189	2688564	ATAC_chr1_2652189_2688564	CIITA	B Lymphocyte
chr1	2652189	2688564	ATAC_chr1_2652189_2688564	COPS2	Erythroblast
chr1	2652189	2688564	ATAC_chr1_2652189_2688564	CREB1	Embryonic Stem Cell, B Lymphocyte, Erythroblast
chr1	2652189	2688564	ATAC_chr1_2652189_2688564	CREB3	Erythroblast
chr1	2652189	2688564	ATAC_chr1_2652189_2688564	CREBBP	Erythroblast
chr1	2652189	2688564	ATAC_chr1_2652189_2688564	CSDE1	Erythroblast
chr1	2652189	2688564	ATAC_chr1_2652189_2688564	CTCF	Monocyte, Hematopoietic stem and progenitor cell, Embryonic Stem Cell, Erythroid Cell, Macrophage, B Lymphoblast, Erythroblast, Lymphoblastoid, Leukemia, B Lymphocyte, B cell lymphoma, Erythroid Progenitor Cell
chr1	2652189	2688564	ATAC_chr1_2652189_2688564	CTCFL	Erythroblast
chr1	2652189	2688564	ATAC_chr1_2652189_2688564	CUX1	Erythroblast, Leukemia Cell
chr1	2652189	2688564	ATAC_chr1_2652189_2688564	DDX20	Erythroblast
chr1	2652189	2688564	ATAC_chr1_2652189_2688564	DIDO1	Erythroblast
chr1	2652189	2688564	ATAC_chr1_2652189_2688564	DNMT1	Erythroblast
chr1	2652189	2688564	ATAC_chr1_2652189_2688564	DNMT3A	Stem cell
chr1	2652189	2688564	ATAC_chr1_2652189_2688564	DNMT3B	Stem cell, B Lymphocyte
chr1	2652189	2688564	ATAC_chr1_2652189_2688564	DPF2	Erythroblast
chr1	2652189	2688564	ATAC_chr1_2652189_2688564	DRAP1	B Lymphocyte
chr1	2652189	2688564	ATAC_chr1_2652189_2688564	E2F1	B Lymphocyte
chr1	2652189	2688564	ATAC_chr1_2652189_2688564	E2F4	Erythroblast
chr1	2652189	2688564	ATAC_chr1_2652189_2688564	E2F6	Embryonic Stem Cell, Erythroblast
chr1	2652189	2688564	ATAC_chr1_2652189_2688564	EBNA2	B Lymphocyte
chr1	2652189	2688564	ATAC_chr1_2652189_2688564	EBNA3C	B Lymphocyte
chr1	2652189	2688564	ATAC_chr1_2652189_2688564	EED	Proerythroblast, B Lymphocyte
chr1	2652189	2688564	ATAC_chr1_2652189_2688564	EGR1	B Lymphocyte
chr1	2652189	2688564	ATAC_chr1_2652189_2688564	EGR2	Macrophage
chr1	2652189	2688564	ATAC_chr1_2652189_2688564	ELF1	B Lymphocyte, Erythroblast
chr1	2652189	2688564	ATAC_chr1_2652189_2688564	ELK1	Erythroblast, B Lymphocyte
chr1	2652189	2688564	ATAC_chr1_2652189_2688564	EOMES	Embryonic Stem Cell
chr1	2652189	2688564	ATAC_chr1_2652189_2688564	EP300	B Lymphocyte, Erythroblast, Leukemia Cell, T Lymphocyte, Pre-B Lymphocyte, Myeloblast, Stem cell, Embryonic Stem Cell
chr1	2652189	2688564	ATAC_chr1_2652189_2688564	EPC1	Lymphoblast
chr1	2652189	2688564	ATAC_chr1_2652189_2688564	ERG	Hematopoietic Cell, T Lymphocyte, Acute myeloid leukemia, Myeloblast
chr1	2652189	2688564	ATAC_chr1_2652189_2688564	ESR1	Embryonic Stem Cell
chr1	2652189	2688564	ATAC_chr1_2652189_2688564	ETS1	T Lymphocyte, Erythroblast, iPSC
chr1	2652189	2688564	ATAC_chr1_2652189_2688564	ETS2	Erythroblast
chr1	2652189	2688564	ATAC_chr1_2652189_2688564	ETV1	Erythroblast
chr1	2652189	2688564	ATAC_chr1_2652189_2688564	EZH1	Proerythroblast
chr1	2652189	2688564	ATAC_chr1_2652189_2688564	EZH2	Multiple myeloma cell, Multiple myeloma, B Lymphocyte, iPSC, Proerythroblast, B cell lymphoma, T Lymphocyte, Erythroblast
chr1	2652189	2688564	ATAC_chr1_2652189_2688564	FAIRE	Macrophage, Erythroblast
chr1	2652189	2688564	ATAC_chr1_2652189_2688564	FAM208A	Leukemia
chr1	2652189	2688564	ATAC_chr1_2652189_2688564	FGFR1	iPSC
chr1	2652189	2688564	ATAC_chr1_2652189_2688564	FLI1	Megakaryocyte
chr1	2652189	2688564	ATAC_chr1_2652189_2688564	FOS	Erythroblast
chr1	2652189	2688564	ATAC_chr1_2652189_2688564	FOSL1	Erythroblast
chr1	2652189	2688564	ATAC_chr1_2652189_2688564	FOXA2	Embryonic Stem Cell
chr1	2652189	2688564	ATAC_chr1_2652189_2688564	FOXJ2	Erythroblast
chr1	2652189	2688564	ATAC_chr1_2652189_2688564	FOXK2	Erythroblast
chr1	2652189	2688564	ATAC_chr1_2652189_2688564	FOXM1	B Lymphocyte
chr1	2652189	2688564	ATAC_chr1_2652189_2688564	FOXO3	Erythroblast
chr1	2652189	2688564	ATAC_chr1_2652189_2688564	FOXP1	Embryonic Stem Cell
chr1	2652189	2688564	ATAC_chr1_2652189_2688564	FOXP3	T Lymphocyte
chr1	2652189	2688564	ATAC_chr1_2652189_2688564	GABPA	T Lymphocyte, B Lymphocyte, Leukemia Cell, Erythroblast
chr1	2652189	2688564	ATAC_chr1_2652189_2688564	GATA1	Proerythroblast, Erythroblast, Hematopoietic stem and progenitor cell, Erythroid Cell
chr1	2652189	2688564	ATAC_chr1_2652189_2688564	GATA2	Erythroid progenitor, Haematopoietic Progenitor Cell, Megakaryocyte, Erythroblast
chr1	2652189	2688564	ATAC_chr1_2652189_2688564	GATA3	Th2
chr1	2652189	2688564	ATAC_chr1_2652189_2688564	GATA4	Embryonic Stem Cell
chr1	2652189	2688564	ATAC_chr1_2652189_2688564	GFI1B	Proerythroblast
chr1	2652189	2688564	ATAC_chr1_2652189_2688564	GTF2A2	Erythroblast
chr1	2652189	2688564	ATAC_chr1_2652189_2688564	GTF2E2	Erythroblast
chr1	2652189	2688564	ATAC_chr1_2652189_2688564	GTF2F1	Erythroblast
chr1	2652189	2688564	ATAC_chr1_2652189_2688564	H2AZ	B Lymphocyte, CD14 cell, T Lymphocyte, Erythroblast, Monocyte
chr1	2652189	2688564	ATAC_chr1_2652189_2688564	HAND1	Embryonic Stem Cell
chr1	2652189	2688564	ATAC_chr1_2652189_2688564	HCFC1	Erythroblast
chr1	2652189	2688564	ATAC_chr1_2652189_2688564	HDAC1	Erythroblast, Erythroid progenitor, B cell precursor, Leukemia Cell
chr1	2652189	2688564	ATAC_chr1_2652189_2688564	HDAC2	Erythroid progenitor, Erythroblast, Stem cell, Embryonic Stem Cell
chr1	2652189	2688564	ATAC_chr1_2652189_2688564	HDAC6	Erythroblast
chr1	2652189	2688564	ATAC_chr1_2652189_2688564	HDAC8	Erythroblast
chr1	2652189	2688564	ATAC_chr1_2652189_2688564	HDGF	B Lymphocyte, Erythroblast
chr1	2652189	2688564	ATAC_chr1_2652189_2688564	HES1	Erythroblast
chr1	2652189	2688564	ATAC_chr1_2652189_2688564	HEY1	Erythroblast
chr1	2652189	2688564	ATAC_chr1_2652189_2688564	HIF1A	Macrophage
chr1	2652189	2688564	ATAC_chr1_2652189_2688564	HINFP	Erythroblast
chr1	2652189	2688564	ATAC_chr1_2652189_2688564	HIST1H1B	Embryonic Stem Cell
chr1	2652189	2688564	ATAC_chr1_2652189_2688564	HLTF	Erythroblast
chr1	2652189	2688564	ATAC_chr1_2652189_2688564	HMBOX1	Erythroblast
chr1	2652189	2688564	ATAC_chr1_2652189_2688564	HMGN3	Erythroblast
chr1	2652189	2688564	ATAC_chr1_2652189_2688564	HOXA11	Lymphoblast
chr1	2652189	2688564	ATAC_chr1_2652189_2688564	HSF1	Erythroblast
chr1	2652189	2688564	ATAC_chr1_2652189_2688564	HSF2	Erythroblast
chr1	2652189	2688564	ATAC_chr1_2652189_2688564	ID3	Erythroblast
chr1	2652189	2688564	ATAC_chr1_2652189_2688564	IKZF1	B cell precursor, B Lymphocyte, Erythroblast
chr1	2652189	2688564	ATAC_chr1_2652189_2688564	ILK	Erythroblast
chr1	2652189	2688564	ATAC_chr1_2652189_2688564	INO80	T Lymphocyte
chr1	2652189	2688564	ATAC_chr1_2652189_2688564	IRF1	Erythroblast, Monocyte
chr1	2652189	2688564	ATAC_chr1_2652189_2688564	IRF2	Proerythroblast
chr1	2652189	2688564	ATAC_chr1_2652189_2688564	IRF4	B Lymphocyte
chr1	2652189	2688564	ATAC_chr1_2652189_2688564	IRF5	Monocyte
chr1	2652189	2688564	ATAC_chr1_2652189_2688564	IRF9	Erythroblast
chr1	2652189	2688564	ATAC_chr1_2652189_2688564	JARID2	iPSC
chr1	2652189	2688564	ATAC_chr1_2652189_2688564	JMJD1C	Monocyte, Myeloblast
chr1	2652189	2688564	ATAC_chr1_2652189_2688564	JUN	Erythroblast
chr1	2652189	2688564	ATAC_chr1_2652189_2688564	JUNB	iPSC, Erythroblast
chr1	2652189	2688564	ATAC_chr1_2652189_2688564	JUND	Embryonic Stem Cell, Erythroblast, B Lymphocyte
chr1	2652189	2688564	ATAC_chr1_2652189_2688564	KAT8	Erythroblast
chr1	2652189	2688564	ATAC_chr1_2652189_2688564	KDM1A	Erythroblast, Myeloblast
chr1	2652189	2688564	ATAC_chr1_2652189_2688564	KDM2B	Leukemia Cell, B cell lymphoma, B Lymphocyte, hESC
chr1	2652189	2688564	ATAC_chr1_2652189_2688564	KDM4B	Erythroblast
chr1	2652189	2688564	ATAC_chr1_2652189_2688564	KDM5A	Embryonic Stem Cell
chr1	2652189	2688564	ATAC_chr1_2652189_2688564	KDM5B	Erythroblast, Embryonic Stem Cell
chr1	2652189	2688564	ATAC_chr1_2652189_2688564	KDM5C	Erythroblast
chr1	2652189	2688564	ATAC_chr1_2652189_2688564	KDM6B	T Lymphocyte
chr1	2652189	2688564	ATAC_chr1_2652189_2688564	KLF1	Erythroblast
chr1	2652189	2688564	ATAC_chr1_2652189_2688564	KLF13	Erythroblast
chr1	2652189	2688564	ATAC_chr1_2652189_2688564	KLF16	Erythroblast
chr1	2652189	2688564	ATAC_chr1_2652189_2688564	KLF4	iPSC
chr1	2652189	2688564	ATAC_chr1_2652189_2688564	KLF5	Embryonic Stem Cell
chr1	2652189	2688564	ATAC_chr1_2652189_2688564	KMT2A	Leukemia Cell, Pre-B Lymphocyte, B Lymphocyte, Monocyte
chr1	2652189	2688564	ATAC_chr1_2652189_2688564	KRAB	Erythroblast
chr1	2652189	2688564	ATAC_chr1_2652189_2688564	L3MBTL2	Erythroblast
chr1	2652189	2688564	ATAC_chr1_2652189_2688564	LANA	B cell lymphoma
chr1	2652189	2688564	ATAC_chr1_2652189_2688564	LARP7	Erythroblast
chr1	2652189	2688564	ATAC_chr1_2652189_2688564	LEF1	Erythroblast
chr1	2652189	2688564	ATAC_chr1_2652189_2688564	LEO1	B Lymphocyte
chr1	2652189	2688564	ATAC_chr1_2652189_2688564	LMNB1	Burkitt's lymphoma
chr1	2652189	2688564	ATAC_chr1_2652189_2688564	LMO2	T Lymphocyte, Myeloblast
chr1	2652189	2688564	ATAC_chr1_2652189_2688564	LYL1	Monocyte
chr1	2652189	2688564	ATAC_chr1_2652189_2688564	MAFF	Erythroblast
chr1	2652189	2688564	ATAC_chr1_2652189_2688564	MAFG	Erythroblast
chr1	2652189	2688564	ATAC_chr1_2652189_2688564	MAFK	B Lymphocyte, Erythroblast, B cell lymphoma
chr1	2652189	2688564	ATAC_chr1_2652189_2688564	MAX	B cell lymphoma, Embryonic Stem Cell, Erythroblast, B Lymphocyte
chr1	2652189	2688564	ATAC_chr1_2652189_2688564	MAZ	Erythroblast, B Lymphocyte
chr1	2652189	2688564	ATAC_chr1_2652189_2688564	MBD2	Erythroblast
chr1	2652189	2688564	ATAC_chr1_2652189_2688564	MBTD1	Lymphoblast
chr1	2652189	2688564	ATAC_chr1_2652189_2688564	MCM3	Erythroblast
chr1	2652189	2688564	ATAC_chr1_2652189_2688564	MCM5	Erythroblast
chr1	2652189	2688564	ATAC_chr1_2652189_2688564	MCM7	Erythroblast
chr1	2652189	2688564	ATAC_chr1_2652189_2688564	MED1	B Lymphocyte, T Lymphocyte, B cell lymphoma, Myeloid Cell
chr1	2652189	2688564	ATAC_chr1_2652189_2688564	MEF2D	Erythroblast
chr1	2652189	2688564	ATAC_chr1_2652189_2688564	MIER1	Erythroblast
chr1	2652189	2688564	ATAC_chr1_2652189_2688564	MLLT1	Erythroblast, Monocyte, B Lymphocyte, Pre-B Lymphocyte
chr1	2652189	2688564	ATAC_chr1_2652189_2688564	MORC2	Leukemia
chr1	2652189	2688564	ATAC_chr1_2652189_2688564	MTA2	B Lymphocyte, Erythroblast
chr1	2652189	2688564	ATAC_chr1_2652189_2688564	MTA3	B Lymphocyte
chr1	2652189	2688564	ATAC_chr1_2652189_2688564	MXI1	Embryonic Stem Cell, Erythroblast, B Lymphocyte
chr1	2652189	2688564	ATAC_chr1_2652189_2688564	MYB	Th1
chr1	2652189	2688564	ATAC_chr1_2652189_2688564	MYC	B Lymphocyte, B cell lymphoma, Erythroblast, Embryonic Stem Cell, Hematopoietic stem and progenitor cell
chr1	2652189	2688564	ATAC_chr1_2652189_2688564	MYH11	Leukemia Cell
chr1	2652189	2688564	ATAC_chr1_2652189_2688564	MYNN	Erythroblast
chr1	2652189	2688564	ATAC_chr1_2652189_2688564	NANOG	Embryonic Stem Cell
chr1	2652189	2688564	ATAC_chr1_2652189_2688564	NBN	Erythroblast
chr1	2652189	2688564	ATAC_chr1_2652189_2688564	NCOA1	Erythroblast
chr1	2652189	2688564	ATAC_chr1_2652189_2688564	NCOR1	B cell lymphoma
chr1	2652189	2688564	ATAC_chr1_2652189_2688564	NCOR2	B Lymphocyte
chr1	2652189	2688564	ATAC_chr1_2652189_2688564	NELFE	Erythroblast
chr1	2652189	2688564	ATAC_chr1_2652189_2688564	NFE2	Hematopoietic stem and progenitor cell, Proerythroblast, Erythroid Progenitor Cell, Erythroblast, B Lymphocyte
chr1	2652189	2688564	ATAC_chr1_2652189_2688564	NFE2L1	Erythroblast
chr1	2652189	2688564	ATAC_chr1_2652189_2688564	NFIA	Erythroblast
chr1	2652189	2688564	ATAC_chr1_2652189_2688564	NFKB1	Lymphoblastoid
chr1	2652189	2688564	ATAC_chr1_2652189_2688564	NFRKB	Erythroblast
chr1	2652189	2688564	ATAC_chr1_2652189_2688564	NFYA	Erythroblast
chr1	2652189	2688564	ATAC_chr1_2652189_2688564	NIPBL	Embryonic Stem Cell
chr1	2652189	2688564	ATAC_chr1_2652189_2688564	NKRF	Erythroblast
chr1	2652189	2688564	ATAC_chr1_2652189_2688564	NOTCH1	T Lymphocyte
chr1	2652189	2688564	ATAC_chr1_2652189_2688564	NOTCH3	Leukemia
chr1	2652189	2688564	ATAC_chr1_2652189_2688564	NR1H2	Monocyte
chr1	2652189	2688564	ATAC_chr1_2652189_2688564	NR2C2	Erythroid Cell, Erythroblast, B Lymphocyte
chr1	2652189	2688564	ATAC_chr1_2652189_2688564	NR2F1	Erythroblast
chr1	2652189	2688564	ATAC_chr1_2652189_2688564	NR2F2	Erythroblast
chr1	2652189	2688564	ATAC_chr1_2652189_2688564	NR2F6	Erythroblast
chr1	2652189	2688564	ATAC_chr1_2652189_2688564	NR3C1	Macrophage
chr1	2652189	2688564	ATAC_chr1_2652189_2688564	NR4A1	Erythroblast, Acute myeloid leukemia
chr1	2652189	2688564	ATAC_chr1_2652189_2688564	NRF1	Erythroblast
chr1	2652189	2688564	ATAC_chr1_2652189_2688564	NUP98	Embryonic Stem Cell
chr1	2652189	2688564	ATAC_chr1_2652189_2688564	ORC2	Erythroblast
chr1	2652189	2688564	ATAC_chr1_2652189_2688564	PAF1	B Lymphocyte
chr1	2652189	2688564	ATAC_chr1_2652189_2688564	PAX5	B Lymphocyte
chr1	2652189	2688564	ATAC_chr1_2652189_2688564	PBX2	Erythroblast
chr1	2652189	2688564	ATAC_chr1_2652189_2688564	PBX3	B Lymphocyte
chr1	2652189	2688564	ATAC_chr1_2652189_2688564	PCGF1	Erythroblast
chr1	2652189	2688564	ATAC_chr1_2652189_2688564	PCGF2	Erythroblast
chr1	2652189	2688564	ATAC_chr1_2652189_2688564	PDX1	Embryonic Stem Cell
chr1	2652189	2688564	ATAC_chr1_2652189_2688564	PHF8	Erythroblast
chr1	2652189	2688564	ATAC_chr1_2652189_2688564	PKNOX1	Erythroblast
chr1	2652189	2688564	ATAC_chr1_2652189_2688564	POLR2A	Proerythroblast, B Lymphocyte, Erythroblast, Macrophage, T Lymphocyte, Monocyte, Plasmacytoid dendritic cell, Lymphoblastoid, Myeloid Cell, B cell lymphoma, Embryonic Stem Cell, Th1, Lymphoblast
chr1	2652189	2688564	ATAC_chr1_2652189_2688564	POLR2AphosphoS5	iPSC
chr1	2652189	2688564	ATAC_chr1_2652189_2688564	POLR3D	Monocyte, Macrophage
chr1	2652189	2688564	ATAC_chr1_2652189_2688564	POLR3G	Stem cell
chr1	2652189	2688564	ATAC_chr1_2652189_2688564	POU2F2	B cell lymphoma, Lymphoblastoid, B Lymphocyte
chr1	2652189	2688564	ATAC_chr1_2652189_2688564	POU5F1	Embryonic Stem Cell, iPSC
chr1	2652189	2688564	ATAC_chr1_2652189_2688564	PRDM1	Embryonic Stem Cell, Plasma Cell
chr1	2652189	2688564	ATAC_chr1_2652189_2688564	PRDM11	B Lymphocyte
chr1	2652189	2688564	ATAC_chr1_2652189_2688564	PSIP1	Leukemia Cell, T Lymphocyte
chr1	2652189	2688564	ATAC_chr1_2652189_2688564	PTRF	Erythroblast
chr1	2652189	2688564	ATAC_chr1_2652189_2688564	PTTG1	Erythroblast
chr1	2652189	2688564	ATAC_chr1_2652189_2688564	PYGO2	Erythroblast
chr1	2652189	2688564	ATAC_chr1_2652189_2688564	RAD21	Erythroblast
chr1	2652189	2688564	ATAC_chr1_2652189_2688564	RAD51	Erythroblast
chr1	2652189	2688564	ATAC_chr1_2652189_2688564	RBBP5	Erythroblast, Embryonic Stem Cell
chr1	2652189	2688564	ATAC_chr1_2652189_2688564	RBPJ	T Lymphocyte
chr1	2652189	2688564	ATAC_chr1_2652189_2688564	RCOR1	Erythroblast
chr1	2652189	2688564	ATAC_chr1_2652189_2688564	REL	Lymphoblastoid
chr1	2652189	2688564	ATAC_chr1_2652189_2688564	RELA	Monocyte, Erythroblast, Lymphoblastoid
chr1	2652189	2688564	ATAC_chr1_2652189_2688564	RELB	Lymphoblastoid
chr1	2652189	2688564	ATAC_chr1_2652189_2688564	REPIN1	Myeloblast
chr1	2652189	2688564	ATAC_chr1_2652189_2688564	REST	B Lymphocyte, T Lymphocyte, Embryonic Stem Cell, Erythroblast
chr1	2652189	2688564	ATAC_chr1_2652189_2688564	RFX1	Erythroblast
chr1	2652189	2688564	ATAC_chr1_2652189_2688564	RFX5	B Lymphocyte, Erythroblast
chr1	2652189	2688564	ATAC_chr1_2652189_2688564	RNF2	Erythroblast, hESC
chr1	2652189	2688564	ATAC_chr1_2652189_2688564	RUNX1	T Lymphocyte, Monocyte, Acute myeloid leukemia, Pre-B Lymphocyte, Erythroblast, Myeloblast, AML cell, Hematopoietic stem and progenitor cell, Myeloid Cell, Megakaryocyte
chr1	2652189	2688564	ATAC_chr1_2652189_2688564	RUNX1T1	Myeloblast
chr1	2652189	2688564	ATAC_chr1_2652189_2688564	RUNX3	B Lymphocyte
chr1	2652189	2688564	ATAC_chr1_2652189_2688564	RXRG	Macrophage
chr1	2652189	2688564	ATAC_chr1_2652189_2688564	SAP30	Erythroblast
chr1	2652189	2688564	ATAC_chr1_2652189_2688564	SCML2	Erythroblast
chr1	2652189	2688564	ATAC_chr1_2652189_2688564	SETD1A	Pre-B Lymphocyte, Erythroid Cell
chr1	2652189	2688564	ATAC_chr1_2652189_2688564	SETDB1	Erythroblast
chr1	2652189	2688564	ATAC_chr1_2652189_2688564	SIN3A	Embryonic Stem Cell, Erythroblast, B Lymphocyte
chr1	2652189	2688564	ATAC_chr1_2652189_2688564	SIRT1	Leukemia
chr1	2652189	2688564	ATAC_chr1_2652189_2688564	SIRT6	Erythroblast
chr1	2652189	2688564	ATAC_chr1_2652189_2688564	SIX5	Erythroblast
chr1	2652189	2688564	ATAC_chr1_2652189_2688564	SKI	Acute myeloid leukemia
chr1	2652189	2688564	ATAC_chr1_2652189_2688564	SMAD2	Embryonic Stem Cell
chr1	2652189	2688564	ATAC_chr1_2652189_2688564	SMAD3	Embryonic Stem Cell, hESC
chr1	2652189	2688564	ATAC_chr1_2652189_2688564	SMAD4	Embryonic Stem Cell
chr1	2652189	2688564	ATAC_chr1_2652189_2688564	SMAD5	B Lymphocyte
chr1	2652189	2688564	ATAC_chr1_2652189_2688564	SMARCA4	Erythroblast, CD36 Cell
chr1	2652189	2688564	ATAC_chr1_2652189_2688564	SMARCA5	Erythroblast
chr1	2652189	2688564	ATAC_chr1_2652189_2688564	SMARCE1	Erythroblast
chr1	2652189	2688564	ATAC_chr1_2652189_2688564	SMC1A	Embryonic Stem Cell, B cell lymphoma, Macrophage
chr1	2652189	2688564	ATAC_chr1_2652189_2688564	SMC3	Embryonic Stem Cell, B Lymphocyte, Erythroblast
chr1	2652189	2688564	ATAC_chr1_2652189_2688564	SON	Leukemia
chr1	2652189	2688564	ATAC_chr1_2652189_2688564	SOX2	hESC
chr1	2652189	2688564	ATAC_chr1_2652189_2688564	SOX9	Embryonic Stem Cell
chr1	2652189	2688564	ATAC_chr1_2652189_2688564	SP1	B Lymphocyte, Erythroblast, Embryonic Stem Cell
chr1	2652189	2688564	ATAC_chr1_2652189_2688564	SP2	Erythroblast
chr1	2652189	2688564	ATAC_chr1_2652189_2688564	SP4	Embryonic Stem Cell
chr1	2652189	2688564	ATAC_chr1_2652189_2688564	SPI1	Monocyte, Macrophage, Hematopoietic stem and progenitor cell, Leukemia Cell, B Lymphocyte, Embryonic Stem Cell, Erythroblast
chr1	2652189	2688564	ATAC_chr1_2652189_2688564	SPIB	B Lymphocyte
chr1	2652189	2688564	ATAC_chr1_2652189_2688564	SRCAP	T Lymphocyte
chr1	2652189	2688564	ATAC_chr1_2652189_2688564	SREBF1	B Lymphocyte
chr1	2652189	2688564	ATAC_chr1_2652189_2688564	SRF	Embryonic Stem Cell, B Lymphocyte, Erythroblast
chr1	2652189	2688564	ATAC_chr1_2652189_2688564	SRSF3	Erythroblast
chr1	2652189	2688564	ATAC_chr1_2652189_2688564	STAG1	Hematopoietic stem and progenitor cell, Erythroid Cell, Lymphoblastoid, B Lymphocyte
chr1	2652189	2688564	ATAC_chr1_2652189_2688564	STAT1	Monocyte, Erythroblast, B Lymphocyte
chr1	2652189	2688564	ATAC_chr1_2652189_2688564	STAT2	Erythroblast
chr1	2652189	2688564	ATAC_chr1_2652189_2688564	STAT3	B Lymphocyte, B cell lymphoma
chr1	2652189	2688564	ATAC_chr1_2652189_2688564	STAT4	Monocyte
chr1	2652189	2688564	ATAC_chr1_2652189_2688564	STAT5	Macrophage, T Lymphocyte
chr1	2652189	2688564	ATAC_chr1_2652189_2688564	STAT5A	T Lymphocyte, B Lymphocyte, Erythroblast
chr1	2652189	2688564	ATAC_chr1_2652189_2688564	STAT5B	T Lymphocyte
chr1	2652189	2688564	ATAC_chr1_2652189_2688564	STAT6	Macrophage
chr1	2652189	2688564	ATAC_chr1_2652189_2688564	SUMO2	Erythroblast
chr1	2652189	2688564	ATAC_chr1_2652189_2688564	SUPT5H	Erythroblast
chr1	2652189	2688564	ATAC_chr1_2652189_2688564	SUZ12	B Lymphocyte, Embryonic Stem Cell, Proerythroblast, Erythroblast
chr1	2652189	2688564	ATAC_chr1_2652189_2688564	T	Th1, Monocyte, B cell lymphoma
chr1	2652189	2688564	ATAC_chr1_2652189_2688564	TAF1	Embryonic Stem Cell, Lymphoblastoid
chr1	2652189	2688564	ATAC_chr1_2652189_2688564	TAF7	Erythroblast, Embryonic Stem Cell
chr1	2652189	2688564	ATAC_chr1_2652189_2688564	TAL1	Hematopoietic stem and progenitor cell, Erythroid Cell, Megakaryocyte, Erythroblast, Proerythroblast, Embryonic Stem Cell, Erythroid Progenitor Cell
chr1	2652189	2688564	ATAC_chr1_2652189_2688564	TARDBP	Erythroblast, B Lymphocyte
chr1	2652189	2688564	ATAC_chr1_2652189_2688564	TBL1XR1	Erythroblast
chr1	2652189	2688564	ATAC_chr1_2652189_2688564	TBP	Erythroblast
chr1	2652189	2688564	ATAC_chr1_2652189_2688564	TCF12	Myeloblast, B Lymphocyte
chr1	2652189	2688564	ATAC_chr1_2652189_2688564	TCF4	Plasmacytoid dendritic cell
chr1	2652189	2688564	ATAC_chr1_2652189_2688564	TCF7	Erythroblast
chr1	2652189	2688564	ATAC_chr1_2652189_2688564	TCF7L1	B Lymphocyte, Myeloblast
chr1	2652189	2688564	ATAC_chr1_2652189_2688564	TCF7L2	Erythroblast
chr1	2652189	2688564	ATAC_chr1_2652189_2688564	TEAD2	Erythroblast
chr1	2652189	2688564	ATAC_chr1_2652189_2688564	TEAD4	Embryonic Stem Cell, Erythroblast
chr1	2652189	2688564	ATAC_chr1_2652189_2688564	TERF1	Lymphoblastoid
chr1	2652189	2688564	ATAC_chr1_2652189_2688564	TERF2	Lymphoblastoid
chr1	2652189	2688564	ATAC_chr1_2652189_2688564	TERT	hESC
chr1	2652189	2688564	ATAC_chr1_2652189_2688564	TET1	hESC
chr1	2652189	2688564	ATAC_chr1_2652189_2688564	TET2	T Lymphocyte, Monocyte
chr1	2652189	2688564	ATAC_chr1_2652189_2688564	TFAP2A	Embryonic Stem Cell
chr1	2652189	2688564	ATAC_chr1_2652189_2688564	TFDP1	B Lymphocyte, Erythroblast
chr1	2652189	2688564	ATAC_chr1_2652189_2688564	THAP1	Erythroblast
chr1	2652189	2688564	ATAC_chr1_2652189_2688564	THAP11	Embryonic Stem Cell
chr1	2652189	2688564	ATAC_chr1_2652189_2688564	TLX1	T Lymphocyte
chr1	2652189	2688564	ATAC_chr1_2652189_2688564	TRIM24	Erythroblast
chr1	2652189	2688564	ATAC_chr1_2652189_2688564	TRIM25	Erythroblast
chr1	2652189	2688564	ATAC_chr1_2652189_2688564	TRIM28	Embryonic Stem Cell, Hematopoietic Stem Cell, Erythroblast
chr1	2652189	2688564	ATAC_chr1_2652189_2688564	TSC22D4	Erythroblast
chr1	2652189	2688564	ATAC_chr1_2652189_2688564	UBTF	Erythroblast
chr1	2652189	2688564	ATAC_chr1_2652189_2688564	USF1	B Lymphocyte, Erythroid Cell
chr1	2652189	2688564	ATAC_chr1_2652189_2688564	USF2	Erythroblast, Embryonic Stem Cell
chr1	2652189	2688564	ATAC_chr1_2652189_2688564	VDR	Monocyte, Macrophage
chr1	2652189	2688564	ATAC_chr1_2652189_2688564	WHSC1	Erythroblast
chr1	2652189	2688564	ATAC_chr1_2652189_2688564	WRNIP1	B Lymphocyte
chr1	2652189	2688564	ATAC_chr1_2652189_2688564	XRCC4	Erythroblast
chr1	2652189	2688564	ATAC_chr1_2652189_2688564	YBX1	Erythroblast
chr1	2652189	2688564	ATAC_chr1_2652189_2688564	YBX3	Erythroblast
chr1	2652189	2688564	ATAC_chr1_2652189_2688564	YY1	Lymphoblastoid, Erythroblast, Embryonic Stem Cell
chr1	2652189	2688564	ATAC_chr1_2652189_2688564	ZBTB11	Erythroblast
chr1	2652189	2688564	ATAC_chr1_2652189_2688564	ZBTB16	Stromal Cell
chr1	2652189	2688564	ATAC_chr1_2652189_2688564	ZBTB33	Erythroblast, B Lymphocyte
chr1	2652189	2688564	ATAC_chr1_2652189_2688564	ZBTB40	Erythroblast, B Lymphocyte
chr1	2652189	2688564	ATAC_chr1_2652189_2688564	ZBTB7A	Proerythroblast, Erythroblast
chr1	2652189	2688564	ATAC_chr1_2652189_2688564	ZC3H8	Erythroblast
chr1	2652189	2688564	ATAC_chr1_2652189_2688564	ZEB1	B Lymphocyte
chr1	2652189	2688564	ATAC_chr1_2652189_2688564	ZEB2	Erythroblast
chr1	2652189	2688564	ATAC_chr1_2652189_2688564	ZFP42	Embryonic Stem Cell
chr1	2652189	2688564	ATAC_chr1_2652189_2688564	ZFX	T cell leukemia, Erythroblast
chr1	2652189	2688564	ATAC_chr1_2652189_2688564	ZKSCAN1	Erythroblast
chr1	2652189	2688564	ATAC_chr1_2652189_2688564	ZKSCAN8	Erythroblast
chr1	2652189	2688564	ATAC_chr1_2652189_2688564	ZMIZ1	Erythroblast
chr1	2652189	2688564	ATAC_chr1_2652189_2688564	ZMYM3	Erythroblast
chr1	2652189	2688564	ATAC_chr1_2652189_2688564	ZNF114	Embryonic Stem Cell
chr1	2652189	2688564	ATAC_chr1_2652189_2688564	ZNF143	Monocyte, B Lymphocyte, Erythroblast, Embryonic Stem Cell
chr1	2652189	2688564	ATAC_chr1_2652189_2688564	ZNF18	Erythroblast
chr1	2652189	2688564	ATAC_chr1_2652189_2688564	ZNF24	Erythroblast
chr1	2652189	2688564	ATAC_chr1_2652189_2688564	ZNF263	Erythroblast
chr1	2652189	2688564	ATAC_chr1_2652189_2688564	ZNF274	Erythroblast
chr1	2652189	2688564	ATAC_chr1_2652189_2688564	ZNF318	Erythroblast
chr1	2652189	2688564	ATAC_chr1_2652189_2688564	ZNF384	Erythroblast, B Lymphocyte
chr1	2652189	2688564	ATAC_chr1_2652189_2688564	ZNF410	Erythroblast
chr1	2652189	2688564	ATAC_chr1_2652189_2688564	ZNF483	Embryonic Stem Cell
chr1	2652189	2688564	ATAC_chr1_2652189_2688564	ZNF486	Embryonic Stem Cell
chr1	2652189	2688564	ATAC_chr1_2652189_2688564	ZNF512	Erythroblast
chr1	2652189	2688564	ATAC_chr1_2652189_2688564	ZNF57	Embryonic Stem Cell
chr1	2652189	2688564	ATAC_chr1_2652189_2688564	ZNF584	Erythroblast
chr1	2652189	2688564	ATAC_chr1_2652189_2688564	ZNF589	Erythroblast, Embryonic Stem Cell
chr1	2652189	2688564	ATAC_chr1_2652189_2688564	ZNF639	Erythroblast
chr1	2652189	2688564	ATAC_chr1_2652189_2688564	ZNF644	Erythroblast
chr1	2652189	2688564	ATAC_chr1_2652189_2688564	ZNF740	Erythroblast
chr1	2652189	2688564	ATAC_chr1_2652189_2688564	ZNF766	Erythroblast
chr1	2652189	2688564	ATAC_chr1_2652189_2688564	ZNF83	Erythroblast
chr1	2652189	2688564	ATAC_chr1_2652189_2688564	ZSCAN29	Erythroblast
chr1	2746576	2749224	ATAC_chr1_2746576_2749224	KMT2A	Leukemia Cell
chr1	2746576	2749224	ATAC_chr1_2746576_2749224	NR3C1	Macrophage
chr1	2746576	2749224	ATAC_chr1_2746576_2749224	PSIP1	Leukemia Cell
chr1	2756503	2759105	ATAC_chr1_2756503_2759105	CTCF	Macrophage
chr1	2756503	2759105	ATAC_chr1_2756503_2759105	ETS2	Erythroblast
chr1	2756503	2759105	ATAC_chr1_2756503_2759105	EZH2	Multiple myeloma, Multiple myeloma cell
chr1	2756503	2759105	ATAC_chr1_2756503_2759105	HDAC1	B cell precursor
chr1	2756503	2759105	ATAC_chr1_2756503_2759105	HDAC8	Erythroblast
chr1	2756503	2759105	ATAC_chr1_2756503_2759105	ID3	Erythroblast
chr1	2756503	2759105	ATAC_chr1_2756503_2759105	IRF1	Erythroblast
chr1	2756503	2759105	ATAC_chr1_2756503_2759105	KMT2A	Leukemia Cell
chr1	2756503	2759105	ATAC_chr1_2756503_2759105	MCM3	Erythroblast
chr1	2756503	2759105	ATAC_chr1_2756503_2759105	MCM7	Erythroblast
chr1	2756503	2759105	ATAC_chr1_2756503_2759105	NR3C1	Macrophage
chr1	2756503	2759105	ATAC_chr1_2756503_2759105	POLR3D	Macrophage, Monocyte
chr1	2756503	2759105	ATAC_chr1_2756503_2759105	RELA	Monocyte
chr1	2756503	2759105	ATAC_chr1_2756503_2759105	SIRT1	Leukemia
chr1	2756503	2759105	ATAC_chr1_2756503_2759105	STAT4	Monocyte
chr1	2756503	2759105	ATAC_chr1_2756503_2759105	TRIM28	Embryonic Stem Cell
chr1	2756503	2759105	ATAC_chr1_2756503_2759105	ZNF24	Erythroblast
chr1	2771548	2774308	ATAC_chr1_2771548_2774308	CTCF	Erythroid Cell, Lymphoblastoid, B Lymphocyte
chr1	2771548	2774308	ATAC_chr1_2771548_2774308	KDM6B	T Lymphocyte
chr1	2771548	2774308	ATAC_chr1_2771548_2774308	NR3C1	Macrophage
chr1	2771548	2774308	ATAC_chr1_2771548_2774308	POLR3D	Macrophage
chr1	2771548	2774308	ATAC_chr1_2771548_2774308	RUNX1	Monocyte
chr1	2771548	2774308	ATAC_chr1_2771548_2774308	STAG1	Lymphoblastoid
chr1	2771548	2774308	ATAC_chr1_2771548_2774308	TET2	T Lymphocyte
chr1	2771548	2774308	ATAC_chr1_2771548_2774308	TRIM28	Embryonic Stem Cell
chr1	7993630	7994674	ATAC_chr1_7993630_7994674	AFF1	B Lymphocyte
chr1	7993630	7994674	ATAC_chr1_7993630_7994674	ATF2	B Lymphocyte
chr1	7993630	7994674	ATAC_chr1_7993630_7994674	ATF3	Erythroblast
chr1	7993630	7994674	ATAC_chr1_7993630_7994674	BACH2	B Lymphocyte
chr1	7993630	7994674	ATAC_chr1_7993630_7994674	BATF	B Lymphocyte
chr1	7993630	7994674	ATAC_chr1_7993630_7994674	BATF3	B Lymphocyte
chr1	7993630	7994674	ATAC_chr1_7993630_7994674	BCL11A	B Lymphocyte
chr1	7993630	7994674	ATAC_chr1_7993630_7994674	BCL3	B Lymphocyte
chr1	7993630	7994674	ATAC_chr1_7993630_7994674	BCL6	B Lymphocyte
chr1	7993630	7994674	ATAC_chr1_7993630_7994674	BCLAF1	B Lymphocyte
chr1	7993630	7994674	ATAC_chr1_7993630_7994674	BHLHE40	B Lymphocyte
chr1	7993630	7994674	ATAC_chr1_7993630_7994674	BRD4	Lymphoblastoid, B Lymphocyte, Plasma Cell
chr1	7993630	7994674	ATAC_chr1_7993630_7994674	C11orf30	Erythroblast
chr1	7993630	7994674	ATAC_chr1_7993630_7994674	CBFB	B Lymphocyte
chr1	7993630	7994674	ATAC_chr1_7993630_7994674	CBX5	B Lymphocyte
chr1	7993630	7994674	ATAC_chr1_7993630_7994674	CDK7	B Lymphocyte
chr1	7993630	7994674	ATAC_chr1_7993630_7994674	CDK8	Megakaryoblastic
chr1	7993630	7994674	ATAC_chr1_7993630_7994674	CEBPA	B Lymphocyte
chr1	7993630	7994674	ATAC_chr1_7993630_7994674	CEBPB	B Lymphocyte
chr1	7993630	7994674	ATAC_chr1_7993630_7994674	CHD2	B Lymphocyte
chr1	7993630	7994674	ATAC_chr1_7993630_7994674	CHRM2	Stromal Cell
chr1	7993630	7994674	ATAC_chr1_7993630_7994674	CREB1	B Lymphocyte
chr1	7993630	7994674	ATAC_chr1_7993630_7994674	CREBBP	B Lymphocyte
chr1	7993630	7994674	ATAC_chr1_7993630_7994674	CTCF	Lymphoblastoid
chr1	7993630	7994674	ATAC_chr1_7993630_7994674	CUX1	B Lymphocyte
chr1	7993630	7994674	ATAC_chr1_7993630_7994674	EBF1	B Lymphocyte
chr1	7993630	7994674	ATAC_chr1_7993630_7994674	EBNA3C	B Lymphocyte
chr1	7993630	7994674	ATAC_chr1_7993630_7994674	EED	B Lymphocyte
chr1	7993630	7994674	ATAC_chr1_7993630_7994674	ELF1	B Lymphocyte
chr1	7993630	7994674	ATAC_chr1_7993630_7994674	ELK1	B Lymphocyte
chr1	7993630	7994674	ATAC_chr1_7993630_7994674	EP300	B Lymphocyte, Pre-B Lymphocyte, Progenitor Cells
chr1	7993630	7994674	ATAC_chr1_7993630_7994674	ERG	Myeloblast
chr1	7993630	7994674	ATAC_chr1_7993630_7994674	ESRRA	B Lymphocyte
chr1	7993630	7994674	ATAC_chr1_7993630_7994674	ETS1	B Lymphocyte
chr1	7993630	7994674	ATAC_chr1_7993630_7994674	ETV6	B Lymphocyte
chr1	7993630	7994674	ATAC_chr1_7993630_7994674	EZH2	iPSC, B Lymphocyte
chr1	7993630	7994674	ATAC_chr1_7993630_7994674	FLI1	Myeloblast
chr1	7993630	7994674	ATAC_chr1_7993630_7994674	FOS	Erythroblast
chr1	7993630	7994674	ATAC_chr1_7993630_7994674	FOSL1	Erythroblast
chr1	7993630	7994674	ATAC_chr1_7993630_7994674	FOXA2	Embryonic Stem Cell
chr1	7993630	7994674	ATAC_chr1_7993630_7994674	FOXM1	B Lymphocyte
chr1	7993630	7994674	ATAC_chr1_7993630_7994674	GATA2	Erythroblast
chr1	7993630	7994674	ATAC_chr1_7993630_7994674	H2AZ	Monocyte, Macrophage, B Lymphocyte, CD14 cell
chr1	7993630	7994674	ATAC_chr1_7993630_7994674	HDAC1	B Lymphocyte
chr1	7993630	7994674	ATAC_chr1_7993630_7994674	HDAC2	B Lymphocyte
chr1	7993630	7994674	ATAC_chr1_7993630_7994674	HDGF	B Lymphocyte
chr1	7993630	7994674	ATAC_chr1_7993630_7994674	HMG20A	B Lymphocyte
chr1	7993630	7994674	ATAC_chr1_7993630_7994674	IKZF1	B Lymphocyte, B cell precursor
chr1	7993630	7994674	ATAC_chr1_7993630_7994674	IRF1	Monocyte
chr1	7993630	7994674	ATAC_chr1_7993630_7994674	IRF4	B Lymphocyte
chr1	7993630	7994674	ATAC_chr1_7993630_7994674	IRF5	Monocyte
chr1	7993630	7994674	ATAC_chr1_7993630_7994674	JUNB	B Lymphocyte
chr1	7993630	7994674	ATAC_chr1_7993630_7994674	JUND	B Lymphocyte
chr1	7993630	7994674	ATAC_chr1_7993630_7994674	KDM1A	Myeloblast
chr1	7993630	7994674	ATAC_chr1_7993630_7994674	KDM2B	B Lymphocyte
chr1	7993630	7994674	ATAC_chr1_7993630_7994674	KMT2A	Monocyte, Pre-B Lymphocyte, B Lymphocyte, Leukemia Cell
chr1	7993630	7994674	ATAC_chr1_7993630_7994674	MAFK	B Lymphocyte, Erythroblast
chr1	7993630	7994674	ATAC_chr1_7993630_7994674	MAX	B Lymphocyte
chr1	7993630	7994674	ATAC_chr1_7993630_7994674	MAZ	B Lymphocyte
chr1	7993630	7994674	ATAC_chr1_7993630_7994674	MED1	B Lymphocyte, Plasma Cell
chr1	7993630	7994674	ATAC_chr1_7993630_7994674	MEF2A	B Lymphocyte
chr1	7993630	7994674	ATAC_chr1_7993630_7994674	MEF2C	B Lymphocyte
chr1	7993630	7994674	ATAC_chr1_7993630_7994674	MLLT1	B Lymphocyte
chr1	7993630	7994674	ATAC_chr1_7993630_7994674	MTA2	B Lymphocyte
chr1	7993630	7994674	ATAC_chr1_7993630_7994674	MTA3	B Lymphocyte
chr1	7993630	7994674	ATAC_chr1_7993630_7994674	MXI1	B Lymphocyte
chr1	7993630	7994674	ATAC_chr1_7993630_7994674	MYC	Embryonic Stem Cell, B Lymphocyte
chr1	7993630	7994674	ATAC_chr1_7993630_7994674	NBN	B Lymphocyte
chr1	7993630	7994674	ATAC_chr1_7993630_7994674	NFATC1	B Lymphocyte
chr1	7993630	7994674	ATAC_chr1_7993630_7994674	NFE2	Erythroblast, Erythroid Cell
chr1	7993630	7994674	ATAC_chr1_7993630_7994674	NFIC	B Lymphocyte
chr1	7993630	7994674	ATAC_chr1_7993630_7994674	NFYB	B Lymphocyte
chr1	7993630	7994674	ATAC_chr1_7993630_7994674	NIPBL	B Lymphocyte, Lymphoblastoid
chr1	7993630	7994674	ATAC_chr1_7993630_7994674	NR3C1	B Lymphocyte
chr1	7993630	7994674	ATAC_chr1_7993630_7994674	PAX5	B Lymphocyte, Lymphoblastoid
chr1	7993630	7994674	ATAC_chr1_7993630_7994674	PBX3	B Lymphocyte
chr1	7993630	7994674	ATAC_chr1_7993630_7994674	PML	B Lymphocyte
chr1	7993630	7994674	ATAC_chr1_7993630_7994674	POLR2A	Lymphoblastoid, B Lymphocyte, T Lymphocyte
chr1	7993630	7994674	ATAC_chr1_7993630_7994674	POU2F2	B Lymphocyte, Lymphoblastoid
chr1	7993630	7994674	ATAC_chr1_7993630_7994674	RAD21	Erythroblast, B Lymphocyte
chr1	7993630	7994674	ATAC_chr1_7993630_7994674	RBPJ	Lymphocyte
chr1	7993630	7994674	ATAC_chr1_7993630_7994674	RCOR1	B Lymphocyte
chr1	7993630	7994674	ATAC_chr1_7993630_7994674	RELA	Lymphoblastoid, B Lymphocyte
chr1	7993630	7994674	ATAC_chr1_7993630_7994674	RELB	Lymphoblastoid
chr1	7993630	7994674	ATAC_chr1_7993630_7994674	RFX5	B Lymphocyte
chr1	7993630	7994674	ATAC_chr1_7993630_7994674	RUNX1	Pre-B Lymphocyte, Monocyte, Myeloblast, Erythroblast
chr1	7993630	7994674	ATAC_chr1_7993630_7994674	RUNX1T1	Myeloblast
chr1	7993630	7994674	ATAC_chr1_7993630_7994674	RUNX3	B Lymphocyte
chr1	7993630	7994674	ATAC_chr1_7993630_7994674	RXRA	B Lymphocyte
chr1	7993630	7994674	ATAC_chr1_7993630_7994674	SIX5	B Lymphocyte
chr1	7993630	7994674	ATAC_chr1_7993630_7994674	SMC1A	B Lymphocyte
chr1	7993630	7994674	ATAC_chr1_7993630_7994674	SMC3	B Lymphocyte
chr1	7993630	7994674	ATAC_chr1_7993630_7994674	SP1	B Lymphocyte
chr1	7993630	7994674	ATAC_chr1_7993630_7994674	SPI1	Macrophage, B Lymphocyte, Lymphoblastoid
chr1	7993630	7994674	ATAC_chr1_7993630_7994674	SREBF1	B Lymphocyte
chr1	7993630	7994674	ATAC_chr1_7993630_7994674	SREBF2	B Lymphocyte
chr1	7993630	7994674	ATAC_chr1_7993630_7994674	SRF	B Lymphocyte
chr1	7993630	7994674	ATAC_chr1_7993630_7994674	STAG1	Lymphoblastoid, B Lymphocyte
chr1	7993630	7994674	ATAC_chr1_7993630_7994674	STAT1	Monocyte, B Lymphocyte
chr1	7993630	7994674	ATAC_chr1_7993630_7994674	STAT3	B Lymphocyte
chr1	7993630	7994674	ATAC_chr1_7993630_7994674	STAT5A	B Lymphocyte
chr1	7993630	7994674	ATAC_chr1_7993630_7994674	T	Monocyte
chr1	7993630	7994674	ATAC_chr1_7993630_7994674	TAF1	B Lymphocyte, Lymphoblastoid
chr1	7993630	7994674	ATAC_chr1_7993630_7994674	TAL1	Proerythroblast
chr1	7993630	7994674	ATAC_chr1_7993630_7994674	TARDBP	B Lymphocyte
chr1	7993630	7994674	ATAC_chr1_7993630_7994674	TBL1XR1	B Lymphocyte
chr1	7993630	7994674	ATAC_chr1_7993630_7994674	TBP	B Lymphocyte
chr1	7993630	7994674	ATAC_chr1_7993630_7994674	TBX21	B Lymphocyte
chr1	7993630	7994674	ATAC_chr1_7993630_7994674	TCF12	B Lymphocyte
chr1	7993630	7994674	ATAC_chr1_7993630_7994674	TCF7L1	Pre-B Lymphocyte, B Lymphocyte
chr1	7993630	7994674	ATAC_chr1_7993630_7994674	TERF1	Lymphoblastoid
chr1	7993630	7994674	ATAC_chr1_7993630_7994674	TET2	T Lymphocyte
chr1	7993630	7994674	ATAC_chr1_7993630_7994674	TRIM22	B Lymphocyte
chr1	7993630	7994674	ATAC_chr1_7993630_7994674	TRIM28	Hematopoietic Stem Cell
chr1	7993630	7994674	ATAC_chr1_7993630_7994674	USF2	B Lymphocyte
chr1	7993630	7994674	ATAC_chr1_7993630_7994674	WRNIP1	B Lymphocyte
chr1	7993630	7994674	ATAC_chr1_7993630_7994674	YY1	Lymphoblastoid, B Lymphocyte, Erythroblast
chr1	7993630	7994674	ATAC_chr1_7993630_7994674	ZBED1	B Lymphocyte
chr1	7993630	7994674	ATAC_chr1_7993630_7994674	ZBTB33	Erythroblast
chr1	7993630	7994674	ATAC_chr1_7993630_7994674	ZBTB40	B Lymphocyte
chr1	7993630	7994674	ATAC_chr1_7993630_7994674	ZBTB7A	Erythroblast
chr1	7993630	7994674	ATAC_chr1_7993630_7994674	ZNF143	B Lymphocyte
chr1	7993630	7994674	ATAC_chr1_7993630_7994674	ZNF384	B Lymphocyte
chr1	7993630	7994674	ATAC_chr1_7993630_7994674	ZNF597	B Lymphocyte
chr1	38173053	38174797	ATAC_chr1_38173053_38174797	ATF2	B Lymphocyte
chr1	38173053	38174797	ATAC_chr1_38173053_38174797	BATF	B Lymphocyte
chr1	38173053	38174797	ATAC_chr1_38173053_38174797	BATF3	B Lymphocyte
chr1	38173053	38174797	ATAC_chr1_38173053_38174797	BCL11A	B Lymphocyte
chr1	38173053	38174797	ATAC_chr1_38173053_38174797	BCL3	B Lymphocyte
chr1	38173053	38174797	ATAC_chr1_38173053_38174797	BCL6	B Lymphocyte
chr1	38173053	38174797	ATAC_chr1_38173053_38174797	BCLAF1	B Lymphocyte
chr1	38173053	38174797	ATAC_chr1_38173053_38174797	BCOR	B Lymphocyte
chr1	38173053	38174797	ATAC_chr1_38173053_38174797	BHLHE40	B Lymphocyte
chr1	38173053	38174797	ATAC_chr1_38173053_38174797	BRD4	Lymphoblastoid, Leukemia Cell
chr1	38173053	38174797	ATAC_chr1_38173053_38174797	CBFB	B Lymphocyte
chr1	38173053	38174797	ATAC_chr1_38173053_38174797	CBX5	B Lymphocyte
chr1	38173053	38174797	ATAC_chr1_38173053_38174797	CEBPB	Leukemia Cell, Monocyte, Macrophage, Erythroblast, B Lymphocyte
chr1	38173053	38174797	ATAC_chr1_38173053_38174797	CHD2	B Lymphocyte
chr1	38173053	38174797	ATAC_chr1_38173053_38174797	CREB1	B Lymphocyte
chr1	38173053	38174797	ATAC_chr1_38173053_38174797	CREBBP	B Lymphocyte
chr1	38173053	38174797	ATAC_chr1_38173053_38174797	CTCF	Lymphoblastoid
chr1	38173053	38174797	ATAC_chr1_38173053_38174797	EBF1	B Lymphocyte
chr1	38173053	38174797	ATAC_chr1_38173053_38174797	EBNA3C	B Lymphocyte
chr1	38173053	38174797	ATAC_chr1_38173053_38174797	EED	B Lymphocyte
chr1	38173053	38174797	ATAC_chr1_38173053_38174797	EP300	B Lymphocyte
chr1	38173053	38174797	ATAC_chr1_38173053_38174797	ETS1	B Lymphocyte
chr1	38173053	38174797	ATAC_chr1_38173053_38174797	ETV6	B Lymphocyte
chr1	38173053	38174797	ATAC_chr1_38173053_38174797	FOXM1	B Lymphocyte
chr1	38173053	38174797	ATAC_chr1_38173053_38174797	FOXP1	B Lymphocyte
chr1	38173053	38174797	ATAC_chr1_38173053_38174797	H2AZ	B Lymphocyte, Macrophage
chr1	38173053	38174797	ATAC_chr1_38173053_38174797	HDGF	B Lymphocyte
chr1	38173053	38174797	ATAC_chr1_38173053_38174797	HMG20A	B Lymphocyte
chr1	38173053	38174797	ATAC_chr1_38173053_38174797	IKZF1	B Lymphocyte
chr1	38173053	38174797	ATAC_chr1_38173053_38174797	IRF4	B Lymphocyte
chr1	38173053	38174797	ATAC_chr1_38173053_38174797	JMJD1C	Monocyte
chr1	38173053	38174797	ATAC_chr1_38173053_38174797	JUNB	B Lymphocyte
chr1	38173053	38174797	ATAC_chr1_38173053_38174797	LYL1	Monocyte
chr1	38173053	38174797	ATAC_chr1_38173053_38174797	MAX	B Lymphocyte
chr1	38173053	38174797	ATAC_chr1_38173053_38174797	MAZ	B Lymphocyte
chr1	38173053	38174797	ATAC_chr1_38173053_38174797	MED1	B Lymphocyte
chr1	38173053	38174797	ATAC_chr1_38173053_38174797	MEF2A	B Lymphocyte
chr1	38173053	38174797	ATAC_chr1_38173053_38174797	MEF2C	B Lymphocyte
chr1	38173053	38174797	ATAC_chr1_38173053_38174797	MLLT1	B Lymphocyte
chr1	38173053	38174797	ATAC_chr1_38173053_38174797	MTA2	B Lymphocyte
chr1	38173053	38174797	ATAC_chr1_38173053_38174797	MTA3	B Lymphocyte
chr1	38173053	38174797	ATAC_chr1_38173053_38174797	MXI1	B Lymphocyte
chr1	38173053	38174797	ATAC_chr1_38173053_38174797	MYC	B Lymphocyte
chr1	38173053	38174797	ATAC_chr1_38173053_38174797	NBN	B Lymphocyte
chr1	38173053	38174797	ATAC_chr1_38173053_38174797	NCOR2	B Lymphocyte
chr1	38173053	38174797	ATAC_chr1_38173053_38174797	NFIC	B Lymphocyte
chr1	38173053	38174797	ATAC_chr1_38173053_38174797	NFYB	B Lymphocyte
chr1	38173053	38174797	ATAC_chr1_38173053_38174797	NIPBL	B Lymphocyte
chr1	38173053	38174797	ATAC_chr1_38173053_38174797	PAX5	B Lymphocyte, Lymphoblastoid
chr1	38173053	38174797	ATAC_chr1_38173053_38174797	PBX3	B Lymphocyte
chr1	38173053	38174797	ATAC_chr1_38173053_38174797	PML	B Lymphocyte
chr1	38173053	38174797	ATAC_chr1_38173053_38174797	POLR2A	B Lymphocyte, Lymphoblastoid, Lymphocyte
chr1	38173053	38174797	ATAC_chr1_38173053_38174797	POU2F2	B Lymphocyte
chr1	38173053	38174797	ATAC_chr1_38173053_38174797	RAD21	B Lymphocyte
chr1	38173053	38174797	ATAC_chr1_38173053_38174797	RCOR1	B Lymphocyte
chr1	38173053	38174797	ATAC_chr1_38173053_38174797	REL	Lymphoblastoid
chr1	38173053	38174797	ATAC_chr1_38173053_38174797	RELA	Lymphoblastoid, B Lymphocyte
chr1	38173053	38174797	ATAC_chr1_38173053_38174797	RELB	Lymphoblastoid
chr1	38173053	38174797	ATAC_chr1_38173053_38174797	RUNX3	B Lymphocyte
chr1	38173053	38174797	ATAC_chr1_38173053_38174797	SMARCB1	Embryonic Stem Cell
chr1	38173053	38174797	ATAC_chr1_38173053_38174797	SMC1A	B Lymphocyte
chr1	38173053	38174797	ATAC_chr1_38173053_38174797	SMC3	B Lymphocyte
chr1	38173053	38174797	ATAC_chr1_38173053_38174797	SP1	B Lymphocyte
chr1	38173053	38174797	ATAC_chr1_38173053_38174797	SPI1	Macrophage, B Lymphocyte, Lymphoblastoid, Monocyte, Hematopoietic stem and progenitor cell
chr1	38173053	38174797	ATAC_chr1_38173053_38174797	SPIB	B Lymphocyte
chr1	38173053	38174797	ATAC_chr1_38173053_38174797	SREBF1	B Lymphocyte
chr1	38173053	38174797	ATAC_chr1_38173053_38174797	STAG1	Lymphoblastoid, B Lymphocyte
chr1	38173053	38174797	ATAC_chr1_38173053_38174797	STAT3	B Lymphocyte
chr1	38173053	38174797	ATAC_chr1_38173053_38174797	STAT5A	B Lymphocyte
chr1	38173053	38174797	ATAC_chr1_38173053_38174797	T	Monocyte
chr1	38173053	38174797	ATAC_chr1_38173053_38174797	TAF1	Lymphoblastoid, B Lymphocyte
chr1	38173053	38174797	ATAC_chr1_38173053_38174797	TARDBP	B Lymphocyte
chr1	38173053	38174797	ATAC_chr1_38173053_38174797	TBL1XR1	B Lymphocyte
chr1	38173053	38174797	ATAC_chr1_38173053_38174797	TBX21	B Lymphocyte
chr1	38173053	38174797	ATAC_chr1_38173053_38174797	TCF12	B Lymphocyte
chr1	38173053	38174797	ATAC_chr1_38173053_38174797	TCF4	Plasmacytoid dendritic cell
chr1	38173053	38174797	ATAC_chr1_38173053_38174797	TRIM22	B Lymphocyte
chr1	38173053	38174797	ATAC_chr1_38173053_38174797	TRIM28	B Lymphocyte
chr1	38173053	38174797	ATAC_chr1_38173053_38174797	USF1	B Lymphocyte
chr1	38173053	38174797	ATAC_chr1_38173053_38174797	USF2	B Lymphocyte
chr1	38173053	38174797	ATAC_chr1_38173053_38174797	VDR	Lymphocyte
chr1	38173053	38174797	ATAC_chr1_38173053_38174797	WRNIP1	B Lymphocyte
chr1	38173053	38174797	ATAC_chr1_38173053_38174797	YY1	B Lymphocyte, Lymphoblastoid
chr1	38173053	38174797	ATAC_chr1_38173053_38174797	ZBED1	B Lymphocyte
chr1	38173053	38174797	ATAC_chr1_38173053_38174797	ZBTB40	B Lymphocyte
chr1	38173053	38174797	ATAC_chr1_38173053_38174797	ZNF143	B Lymphocyte
chr1	38173053	38174797	ATAC_chr1_38173053_38174797	ZNF384	B Lymphocyte
chr1	38173053	38174797	ATAC_chr1_38173053_38174797	ZNF597	B Lymphocyte
chr1	46347931	46348538	ATAC_chr1_46347931_46348538	ADNP	Erythroblast
chr1	46347931	46348538	ATAC_chr1_46347931_46348538	AFF1	B Lymphocyte
chr1	46347931	46348538	ATAC_chr1_46347931_46348538	AFF4	Th1
chr1	46347931	46348538	ATAC_chr1_46347931_46348538	ARID3A	Erythroblast
chr1	46347931	46348538	ATAC_chr1_46347931_46348538	ARNT	Erythroblast
chr1	46347931	46348538	ATAC_chr1_46347931_46348538	ATF1	Erythroblast
chr1	46347931	46348538	ATAC_chr1_46347931_46348538	ATF2	B Lymphocyte, Embryonic Stem Cell
chr1	46347931	46348538	ATAC_chr1_46347931_46348538	ATF3	Erythroblast, Embryonic Stem Cell, B Lymphocyte
chr1	46347931	46348538	ATAC_chr1_46347931_46348538	BACH1	Erythroblast, Embryonic Stem Cell
chr1	46347931	46348538	ATAC_chr1_46347931_46348538	BACH2	B Lymphocyte, B cell lymphoma
chr1	46347931	46348538	ATAC_chr1_46347931_46348538	BATF	B Lymphocyte
chr1	46347931	46348538	ATAC_chr1_46347931_46348538	BCL11A	B Lymphocyte
chr1	46347931	46348538	ATAC_chr1_46347931_46348538	BCL3	B Lymphocyte
chr1	46347931	46348538	ATAC_chr1_46347931_46348538	BCL6	B Lymphocyte, Haematopoietic Progenitor Cell, T Lymphocyte, B cell lymphoma
chr1	46347931	46348538	ATAC_chr1_46347931_46348538	BCLAF1	Erythroblast, B Lymphocyte
chr1	46347931	46348538	ATAC_chr1_46347931_46348538	BCOR	Erythroblast, B cell lymphoma, B Lymphocyte
chr1	46347931	46348538	ATAC_chr1_46347931_46348538	BHLHE40	Erythroblast, B Lymphocyte
chr1	46347931	46348538	ATAC_chr1_46347931_46348538	BPTF	Erythroid Cell
chr1	46347931	46348538	ATAC_chr1_46347931_46348538	BRCA1	Embryonic Stem Cell
chr1	46347931	46348538	ATAC_chr1_46347931_46348538	BRD4	Lymphoblastoid, Myeloid Cell, B Lymphocyte, Leukemia Cell, Erythroblast, T Lymphocyte, B cell lymphoma, Plasma Cell, Th1
chr1	46347931	46348538	ATAC_chr1_46347931_46348538	BRD9	Acute myeloid leukemia
chr1	46347931	46348538	ATAC_chr1_46347931_46348538	C11orf30	Erythroblast
chr1	46347931	46348538	ATAC_chr1_46347931_46348538	CBX1	Erythroblast
chr1	46347931	46348538	ATAC_chr1_46347931_46348538	CBX3	Erythroblast
chr1	46347931	46348538	ATAC_chr1_46347931_46348538	CBX5	B Lymphocyte
chr1	46347931	46348538	ATAC_chr1_46347931_46348538	CCND2	B Lymphocyte
chr1	46347931	46348538	ATAC_chr1_46347931_46348538	CDC5L	Erythroblast
chr1	46347931	46348538	ATAC_chr1_46347931_46348538	CDK12	T Lymphocyte
chr1	46347931	46348538	ATAC_chr1_46347931_46348538	CDK7	B Lymphocyte, T Lymphocyte
chr1	46347931	46348538	ATAC_chr1_46347931_46348538	CDK8	Myeloid Cell
chr1	46347931	46348538	ATAC_chr1_46347931_46348538	CDK9	Acute myeloid leukemia, B Lymphocyte, Plasma Cell, B cell lymphoma, Th2, Th1
chr1	46347931	46348538	ATAC_chr1_46347931_46348538	CEBPA	Erythroblast, B Lymphocyte
chr1	46347931	46348538	ATAC_chr1_46347931_46348538	CEBPB	Erythroblast, Leukemia Cell, B Lymphocyte, Embryonic Stem Cell
chr1	46347931	46348538	ATAC_chr1_46347931_46348538	CEBPD	Erythroblast
chr1	46347931	46348538	ATAC_chr1_46347931_46348538	CHAMP1	Erythroblast
chr1	46347931	46348538	ATAC_chr1_46347931_46348538	CHD2	Embryonic Stem Cell, B Lymphocyte
chr1	46347931	46348538	ATAC_chr1_46347931_46348538	CHD8	iPSC
chr1	46347931	46348538	ATAC_chr1_46347931_46348538	COPS2	Erythroblast
chr1	46347931	46348538	ATAC_chr1_46347931_46348538	CREB1	Embryonic Stem Cell, B Lymphocyte, Erythroblast
chr1	46347931	46348538	ATAC_chr1_46347931_46348538	CSDE1	Erythroblast
chr1	46347931	46348538	ATAC_chr1_46347931_46348538	CTCF	Lymphoblastoid, B Lymphocyte, Monocyte, Macrophage, Erythroid Cell, Leukemia, Hematopoietic stem and progenitor cell, Erythroblast, B Lymphoblast, Embryonic Stem Cell, T Lymphocyte, Stromal Cell, Erythroid Progenitor Cell, B cell lymphoma, Lymphocyte, Proerythroblast, Lymphoblast, Haematopoietic Progenitor Cell, Hematopoietic Stem Cell
chr1	46347931	46348538	ATAC_chr1_46347931_46348538	CTCFL	Erythroblast
chr1	46347931	46348538	ATAC_chr1_46347931_46348538	CUX1	Erythroblast, Leukemia Cell, B Lymphocyte
chr1	46347931	46348538	ATAC_chr1_46347931_46348538	DDX20	Erythroblast
chr1	46347931	46348538	ATAC_chr1_46347931_46348538	DIDO1	Erythroblast
chr1	46347931	46348538	ATAC_chr1_46347931_46348538	DNMT1	Erythroblast
chr1	46347931	46348538	ATAC_chr1_46347931_46348538	DNMT3A	Stem cell
chr1	46347931	46348538	ATAC_chr1_46347931_46348538	DPF2	Erythroblast
chr1	46347931	46348538	ATAC_chr1_46347931_46348538	DRAP1	B Lymphocyte
chr1	46347931	46348538	ATAC_chr1_46347931_46348538	E2F4	B Lymphocyte
chr1	46347931	46348538	ATAC_chr1_46347931_46348538	E2F5	Erythroblast
chr1	46347931	46348538	ATAC_chr1_46347931_46348538	E2F6	Embryonic Stem Cell, Erythroblast
chr1	46347931	46348538	ATAC_chr1_46347931_46348538	EBF1	B Lymphocyte
chr1	46347931	46348538	ATAC_chr1_46347931_46348538	EED	B Lymphocyte
chr1	46347931	46348538	ATAC_chr1_46347931_46348538	EGR1	Erythroblast, B Lymphocyte
chr1	46347931	46348538	ATAC_chr1_46347931_46348538	ELF1	Erythroblast, B Lymphocyte
chr1	46347931	46348538	ATAC_chr1_46347931_46348538	ELK1	Erythroblast
chr1	46347931	46348538	ATAC_chr1_46347931_46348538	EP300	Embryonic Stem Cell, Stem cell, Erythroblast, Acute myeloid leukemia, B Lymphocyte, Leukemia Cell, T Lymphocyte, Myeloblast
chr1	46347931	46348538	ATAC_chr1_46347931_46348538	ERG	Acute myeloid leukemia, Myeloblast, Leukemia Cell
chr1	46347931	46348538	ATAC_chr1_46347931_46348538	ESRRA	B Lymphocyte
chr1	46347931	46348538	ATAC_chr1_46347931_46348538	ETS1	T Lymphocyte, iPSC, B Lymphocyte, Erythroblast
chr1	46347931	46348538	ATAC_chr1_46347931_46348538	ETV1	Erythroblast
chr1	46347931	46348538	ATAC_chr1_46347931_46348538	EZH1	Proerythroblast
chr1	46347931	46348538	ATAC_chr1_46347931_46348538	EZH2	Multiple myeloma cell, Multiple myeloma
chr1	46347931	46348538	ATAC_chr1_46347931_46348538	FAIRE	Macrophage, Erythroblast, Embryonic Stem Cell, B Lymphocyte
chr1	46347931	46348538	ATAC_chr1_46347931_46348538	FLI1	Acute myeloid leukemia, Myeloblast
chr1	46347931	46348538	ATAC_chr1_46347931_46348538	FOS	Erythroblast, B Lymphocyte
chr1	46347931	46348538	ATAC_chr1_46347931_46348538	FOSL1	Erythroblast
chr1	46347931	46348538	ATAC_chr1_46347931_46348538	FOSL2	Stromal Cell
chr1	46347931	46348538	ATAC_chr1_46347931_46348538	FOXA2	Embryonic Stem Cell
chr1	46347931	46348538	ATAC_chr1_46347931_46348538	FOXJ2	Erythroblast
chr1	46347931	46348538	ATAC_chr1_46347931_46348538	FOXK2	Erythroblast
chr1	46347931	46348538	ATAC_chr1_46347931_46348538	FOXM1	B Lymphocyte
chr1	46347931	46348538	ATAC_chr1_46347931_46348538	FOXO3	Erythroblast
chr1	46347931	46348538	ATAC_chr1_46347931_46348538	FOXP1	Embryonic Stem Cell
chr1	46347931	46348538	ATAC_chr1_46347931_46348538	GABPA	Erythroblast, Embryonic Stem Cell, T Lymphocyte
chr1	46347931	46348538	ATAC_chr1_46347931_46348538	GATA1	Proerythroblast, Erythroid Cell, Hematopoietic stem and progenitor cell, Erythroblast
chr1	46347931	46348538	ATAC_chr1_46347931_46348538	GATA2	Erythroblast, Haematopoietic Progenitor Cell
chr1	46347931	46348538	ATAC_chr1_46347931_46348538	H2AZ	CD14 cell
chr1	46347931	46348538	ATAC_chr1_46347931_46348538	HCFC1	Erythroblast
chr1	46347931	46348538	ATAC_chr1_46347931_46348538	HDAC1	Erythroblast, B Lymphocyte, Leukemia Cell, Acute myeloid leukemia, B cell precursor
chr1	46347931	46348538	ATAC_chr1_46347931_46348538	HDAC2	Erythroblast, Acute myeloid leukemia
chr1	46347931	46348538	ATAC_chr1_46347931_46348538	HDAC6	T Lymphocyte
chr1	46347931	46348538	ATAC_chr1_46347931_46348538	HDAC8	Erythroblast
chr1	46347931	46348538	ATAC_chr1_46347931_46348538	HDGF	Erythroblast, B Lymphocyte
chr1	46347931	46348538	ATAC_chr1_46347931_46348538	HES1	Erythroblast
chr1	46347931	46348538	ATAC_chr1_46347931_46348538	HLTF	Erythroblast
chr1	46347931	46348538	ATAC_chr1_46347931_46348538	HMBOX1	Erythroblast
chr1	46347931	46348538	ATAC_chr1_46347931_46348538	HOXA11	Lymphoblast
chr1	46347931	46348538	ATAC_chr1_46347931_46348538	HSF1	Leukemia Cell
chr1	46347931	46348538	ATAC_chr1_46347931_46348538	ID3	Erythroblast
chr1	46347931	46348538	ATAC_chr1_46347931_46348538	IKZF1	B Lymphocyte, Erythroblast
chr1	46347931	46348538	ATAC_chr1_46347931_46348538	IRF1	Erythroblast, Monocyte
chr1	46347931	46348538	ATAC_chr1_46347931_46348538	IRF4	B Lymphocyte
chr1	46347931	46348538	ATAC_chr1_46347931_46348538	JUN	Erythroblast
chr1	46347931	46348538	ATAC_chr1_46347931_46348538	JUNB	Erythroblast, B Lymphocyte
chr1	46347931	46348538	ATAC_chr1_46347931_46348538	JUND	Erythroblast, Embryonic Stem Cell
chr1	46347931	46348538	ATAC_chr1_46347931_46348538	KDM1A	Erythroblast, Myeloblast
chr1	46347931	46348538	ATAC_chr1_46347931_46348538	KDM2B	B cell lymphoma, hESC
chr1	46347931	46348538	ATAC_chr1_46347931_46348538	KDM4B	Erythroblast
chr1	46347931	46348538	ATAC_chr1_46347931_46348538	KLF1	Erythroblast, Erythroid Cell
chr1	46347931	46348538	ATAC_chr1_46347931_46348538	KLF16	Erythroblast
chr1	46347931	46348538	ATAC_chr1_46347931_46348538	KMT2A	Monocyte, Leukemia Cell
chr1	46347931	46348538	ATAC_chr1_46347931_46348538	KMT2D	B cell lymphoma
chr1	46347931	46348538	ATAC_chr1_46347931_46348538	KRAB	Erythroblast
chr1	46347931	46348538	ATAC_chr1_46347931_46348538	L3MBTL2	Erythroblast
chr1	46347931	46348538	ATAC_chr1_46347931_46348538	LANA	T Lymphocyte
chr1	46347931	46348538	ATAC_chr1_46347931_46348538	LARP7	Erythroblast
chr1	46347931	46348538	ATAC_chr1_46347931_46348538	LDB1	Erythroid Progenitor Cell
chr1	46347931	46348538	ATAC_chr1_46347931_46348538	LEF1	Erythroblast
chr1	46347931	46348538	ATAC_chr1_46347931_46348538	MAFF	Erythroblast
chr1	46347931	46348538	ATAC_chr1_46347931_46348538	MAFG	Erythroblast
chr1	46347931	46348538	ATAC_chr1_46347931_46348538	MAFK	Erythroblast, Embryonic Stem Cell, B cell lymphoma, B Lymphocyte
chr1	46347931	46348538	ATAC_chr1_46347931_46348538	MAX	Erythroblast, Embryonic Stem Cell, B Lymphocyte, B cell lymphoma
chr1	46347931	46348538	ATAC_chr1_46347931_46348538	MAZ	Erythroblast, B Lymphocyte
chr1	46347931	46348538	ATAC_chr1_46347931_46348538	MBD2	Erythroblast
chr1	46347931	46348538	ATAC_chr1_46347931_46348538	MBTD1	Lymphoblast
chr1	46347931	46348538	ATAC_chr1_46347931_46348538	MCM3	Erythroblast
chr1	46347931	46348538	ATAC_chr1_46347931_46348538	MCM5	Erythroblast
chr1	46347931	46348538	ATAC_chr1_46347931_46348538	MCM7	Erythroblast
chr1	46347931	46348538	ATAC_chr1_46347931_46348538	MED1	B Lymphocyte, Plasma Cell, T Lymphocyte
chr1	46347931	46348538	ATAC_chr1_46347931_46348538	MEF2A	B Lymphocyte, Erythroblast
chr1	46347931	46348538	ATAC_chr1_46347931_46348538	MEF2C	B Lymphocyte
chr1	46347931	46348538	ATAC_chr1_46347931_46348538	MEF2D	Erythroblast
chr1	46347931	46348538	ATAC_chr1_46347931_46348538	MEIS1	Pre-B Lymphocyte
chr1	46347931	46348538	ATAC_chr1_46347931_46348538	MIER1	Erythroblast
chr1	46347931	46348538	ATAC_chr1_46347931_46348538	MLLT1	Erythroblast, B Lymphocyte, Acute myeloid leukemia
chr1	46347931	46348538	ATAC_chr1_46347931_46348538	MLLT3	AML cell
chr1	46347931	46348538	ATAC_chr1_46347931_46348538	MTA2	Erythroblast, B Lymphocyte
chr1	46347931	46348538	ATAC_chr1_46347931_46348538	MTA3	B Lymphocyte
chr1	46347931	46348538	ATAC_chr1_46347931_46348538	MXI1	Embryonic Stem Cell, B Lymphocyte, Erythroblast
chr1	46347931	46348538	ATAC_chr1_46347931_46348538	MYB	T Lymphocyte
chr1	46347931	46348538	ATAC_chr1_46347931_46348538	MYC	Erythroblast, B cell lymphoma, B Lymphocyte, Embryonic Stem Cell, Hematopoietic stem and progenitor cell
chr1	46347931	46348538	ATAC_chr1_46347931_46348538	MYNN	Erythroblast
chr1	46347931	46348538	ATAC_chr1_46347931_46348538	NANOG	Embryonic Stem Cell
chr1	46347931	46348538	ATAC_chr1_46347931_46348538	NBN	Erythroblast
chr1	46347931	46348538	ATAC_chr1_46347931_46348538	NCOA1	Erythroblast
chr1	46347931	46348538	ATAC_chr1_46347931_46348538	NCOR2	B Lymphocyte
chr1	46347931	46348538	ATAC_chr1_46347931_46348538	NFE2	Erythroblast, Erythroid Cell, Proerythroblast, Erythroid Progenitor Cell, Hematopoietic stem and progenitor cell
chr1	46347931	46348538	ATAC_chr1_46347931_46348538	NFE2L1	Erythroblast
chr1	46347931	46348538	ATAC_chr1_46347931_46348538	NFIA	Erythroblast
chr1	46347931	46348538	ATAC_chr1_46347931_46348538	NFYA	Erythroblast
chr1	46347931	46348538	ATAC_chr1_46347931_46348538	NFYB	Erythroblast
chr1	46347931	46348538	ATAC_chr1_46347931_46348538	NIPBL	Embryonic Stem Cell
chr1	46347931	46348538	ATAC_chr1_46347931_46348538	NKRF	Erythroblast
chr1	46347931	46348538	ATAC_chr1_46347931_46348538	NOTCH1	T Lymphocyte
chr1	46347931	46348538	ATAC_chr1_46347931_46348538	NR2C2	Erythroblast
chr1	46347931	46348538	ATAC_chr1_46347931_46348538	NR2F1	Erythroblast
chr1	46347931	46348538	ATAC_chr1_46347931_46348538	NR2F2	Erythroblast
chr1	46347931	46348538	ATAC_chr1_46347931_46348538	NR2F6	Erythroblast
chr1	46347931	46348538	ATAC_chr1_46347931_46348538	NR3C1	Macrophage
chr1	46347931	46348538	ATAC_chr1_46347931_46348538	NR4A1	Erythroblast, Acute myeloid leukemia
chr1	46347931	46348538	ATAC_chr1_46347931_46348538	NRF1	Erythroblast
chr1	46347931	46348538	ATAC_chr1_46347931_46348538	ORC2	Erythroblast
chr1	46347931	46348538	ATAC_chr1_46347931_46348538	OTX2	Embryonic Stem Cell
chr1	46347931	46348538	ATAC_chr1_46347931_46348538	PAX5	B Lymphocyte, Lymphoblastoid
chr1	46347931	46348538	ATAC_chr1_46347931_46348538	PBX2	Erythroblast
chr1	46347931	46348538	ATAC_chr1_46347931_46348538	PBX3	B Lymphocyte
chr1	46347931	46348538	ATAC_chr1_46347931_46348538	PDX1	Embryonic Stem Cell
chr1	46347931	46348538	ATAC_chr1_46347931_46348538	PKNOX1	Erythroblast
chr1	46347931	46348538	ATAC_chr1_46347931_46348538	PML	Erythroblast, B Lymphocyte
chr1	46347931	46348538	ATAC_chr1_46347931_46348538	POLR2A	Acute myeloid leukemia, Monocyte, Proerythroblast, Erythroblast, Embryonic Stem Cell, Lymphoblastoid, B Lymphocyte, Plasma Cell, T Lymphocyte, Th1, Th2
chr1	46347931	46348538	ATAC_chr1_46347931_46348538	POLR2AphosphoS5	iPSC
chr1	46347931	46348538	ATAC_chr1_46347931_46348538	POLR2H	Erythroblast
chr1	46347931	46348538	ATAC_chr1_46347931_46348538	POLR3A	Erythroblast
chr1	46347931	46348538	ATAC_chr1_46347931_46348538	POU2F2	B Lymphocyte, Lymphoblastoid, B cell lymphoma
chr1	46347931	46348538	ATAC_chr1_46347931_46348538	POU5F1	Embryonic Stem Cell
chr1	46347931	46348538	ATAC_chr1_46347931_46348538	PPARG	Stromal Cell
chr1	46347931	46348538	ATAC_chr1_46347931_46348538	PRAME	Erythroblast
chr1	46347931	46348538	ATAC_chr1_46347931_46348538	PTTG1	Erythroblast
chr1	46347931	46348538	ATAC_chr1_46347931_46348538	RAD21	Erythroblast, Embryonic Stem Cell, B Lymphocyte, Monocyte
chr1	46347931	46348538	ATAC_chr1_46347931_46348538	RBBP5	Erythroblast
chr1	46347931	46348538	ATAC_chr1_46347931_46348538	RBPJ	Lymphocyte, T Lymphocyte
chr1	46347931	46348538	ATAC_chr1_46347931_46348538	RCOR1	Erythroblast, B Lymphocyte
chr1	46347931	46348538	ATAC_chr1_46347931_46348538	RELA	Erythroblast, Lymphoblastoid, B Lymphocyte, Th1
chr1	46347931	46348538	ATAC_chr1_46347931_46348538	REPIN1	Myeloblast
chr1	46347931	46348538	ATAC_chr1_46347931_46348538	REST	Erythroblast, B Lymphocyte
chr1	46347931	46348538	ATAC_chr1_46347931_46348538	RFX1	Erythroblast
chr1	46347931	46348538	ATAC_chr1_46347931_46348538	RFX5	B Lymphocyte
chr1	46347931	46348538	ATAC_chr1_46347931_46348538	RNF2	Erythroblast
chr1	46347931	46348538	ATAC_chr1_46347931_46348538	RUNX1	Erythroblast, Myeloblast, Myeloid Cell, Leukemic Blast Cell, Stem cell
chr1	46347931	46348538	ATAC_chr1_46347931_46348538	RUNX3	B Lymphocyte
chr1	46347931	46348538	ATAC_chr1_46347931_46348538	RXRA	B Lymphocyte
chr1	46347931	46348538	ATAC_chr1_46347931_46348538	SCML2	Erythroblast
chr1	46347931	46348538	ATAC_chr1_46347931_46348538	SETD1A	Erythroid Cell
chr1	46347931	46348538	ATAC_chr1_46347931_46348538	SETDB1	Erythroblast
chr1	46347931	46348538	ATAC_chr1_46347931_46348538	SIN3A	Erythroblast, Embryonic Stem Cell, B Lymphocyte
chr1	46347931	46348538	ATAC_chr1_46347931_46348538	SMAD1	Haematopoietic Progenitor Cell
chr1	46347931	46348538	ATAC_chr1_46347931_46348538	SMAD2/3	Embryonic Stem Cell
chr1	46347931	46348538	ATAC_chr1_46347931_46348538	SMAD5	B Lymphocyte
chr1	46347931	46348538	ATAC_chr1_46347931_46348538	SMARCA4	Erythroblast, Embryonic Stem Cell, B Lymphocyte, Proerythroblast, Haematopoietic Progenitor Cell, Hematopoietic Stem Cell
chr1	46347931	46348538	ATAC_chr1_46347931_46348538	SMARCA5	Erythroblast
chr1	46347931	46348538	ATAC_chr1_46347931_46348538	SMARCB1	Embryonic Stem Cell
chr1	46347931	46348538	ATAC_chr1_46347931_46348538	SMARCC1	Embryonic Stem Cell
chr1	46347931	46348538	ATAC_chr1_46347931_46348538	SMARCE1	Erythroblast
chr1	46347931	46348538	ATAC_chr1_46347931_46348538	SMC1A	B Lymphocyte, Embryonic Stem Cell, Macrophage, B cell lymphoma, Lymphoblastoid
chr1	46347931	46348538	ATAC_chr1_46347931_46348538	SMC3	B Lymphocyte, Erythroblast, Embryonic Stem Cell
chr1	46347931	46348538	ATAC_chr1_46347931_46348538	SP1	B Lymphocyte, Embryonic Stem Cell
chr1	46347931	46348538	ATAC_chr1_46347931_46348538	SP4	Embryonic Stem Cell
chr1	46347931	46348538	ATAC_chr1_46347931_46348538	SPI1	B Lymphocyte, Macrophage, Monocyte
chr1	46347931	46348538	ATAC_chr1_46347931_46348538	SRF	Embryonic Stem Cell, Erythroblast
chr1	46347931	46348538	ATAC_chr1_46347931_46348538	SSU72	Embryonic Stem Cell
chr1	46347931	46348538	ATAC_chr1_46347931_46348538	STAG1	Lymphoblastoid, B Lymphocyte, Hematopoietic stem and progenitor cell, Erythroid Cell
chr1	46347931	46348538	ATAC_chr1_46347931_46348538	STAT1	Monocyte, Erythroblast, B Lymphocyte
chr1	46347931	46348538	ATAC_chr1_46347931_46348538	STAT2	Erythroblast
chr1	46347931	46348538	ATAC_chr1_46347931_46348538	STAT3	B Lymphocyte, B cell lymphoma
chr1	46347931	46348538	ATAC_chr1_46347931_46348538	STAT5A	Erythroblast, B Lymphocyte
chr1	46347931	46348538	ATAC_chr1_46347931_46348538	STAT5B	T Lymphocyte
chr1	46347931	46348538	ATAC_chr1_46347931_46348538	SUMO2	Erythroblast
chr1	46347931	46348538	ATAC_chr1_46347931_46348538	SUPT5H	B Lymphocyte
chr1	46347931	46348538	ATAC_chr1_46347931_46348538	SUZ12	B Lymphocyte
chr1	46347931	46348538	ATAC_chr1_46347931_46348538	T	Th1, Monocyte
chr1	46347931	46348538	ATAC_chr1_46347931_46348538	TAF1	Erythroblast, Embryonic Stem Cell, B Lymphocyte
chr1	46347931	46348538	ATAC_chr1_46347931_46348538	TAF7	Erythroblast, Embryonic Stem Cell
chr1	46347931	46348538	ATAC_chr1_46347931_46348538	TAFII	Embryonic Stem Cell
chr1	46347931	46348538	ATAC_chr1_46347931_46348538	TAL1	Erythroblast
chr1	46347931	46348538	ATAC_chr1_46347931_46348538	TARDBP	B Lymphocyte, Erythroblast
chr1	46347931	46348538	ATAC_chr1_46347931_46348538	TBL1XR1	Erythroblast, B Lymphocyte
chr1	46347931	46348538	ATAC_chr1_46347931_46348538	TBP	Erythroblast, Embryonic Stem Cell
chr1	46347931	46348538	ATAC_chr1_46347931_46348538	TBX21	B Lymphocyte, Th1
chr1	46347931	46348538	ATAC_chr1_46347931_46348538	TCF12	B Lymphocyte, Embryonic Stem Cell
chr1	46347931	46348538	ATAC_chr1_46347931_46348538	TCF4	Plasmacytoid dendritic cell
chr1	46347931	46348538	ATAC_chr1_46347931_46348538	TCF7	Erythroblast
chr1	46347931	46348538	ATAC_chr1_46347931_46348538	TCF7L2	Haematopoietic Progenitor Cell
chr1	46347931	46348538	ATAC_chr1_46347931_46348538	TEAD4	Embryonic Stem Cell, Erythroblast
chr1	46347931	46348538	ATAC_chr1_46347931_46348538	TERF1	Lymphoblastoid
chr1	46347931	46348538	ATAC_chr1_46347931_46348538	TERF2	Lymphoblastoid
chr1	46347931	46348538	ATAC_chr1_46347931_46348538	THAP1	Erythroblast
chr1	46347931	46348538	ATAC_chr1_46347931_46348538	TP53	Embryonic Stem Cell
chr1	46347931	46348538	ATAC_chr1_46347931_46348538	TRIM22	B Lymphocyte
chr1	46347931	46348538	ATAC_chr1_46347931_46348538	TRIM24	Erythroblast
chr1	46347931	46348538	ATAC_chr1_46347931_46348538	TRIM25	Erythroblast
chr1	46347931	46348538	ATAC_chr1_46347931_46348538	TRIM28	B Lymphocyte, Hematopoietic Stem Cell, Embryonic Stem Cell, Erythroblast
chr1	46347931	46348538	ATAC_chr1_46347931_46348538	UBTF	Erythroblast
chr1	46347931	46348538	ATAC_chr1_46347931_46348538	USF1	Embryonic Stem Cell, Erythroblast, Erythroid Cell
chr1	46347931	46348538	ATAC_chr1_46347931_46348538	USF2	Erythroid Cell, B Lymphocyte
chr1	46347931	46348538	ATAC_chr1_46347931_46348538	VDR	Lymphocyte
chr1	46347931	46348538	ATAC_chr1_46347931_46348538	WRNIP1	B Lymphocyte
chr1	46347931	46348538	ATAC_chr1_46347931_46348538	YBX3	Erythroblast
chr1	46347931	46348538	ATAC_chr1_46347931_46348538	YY1	Embryonic Stem Cell, Erythroblast, Lymphoblastoid, B Lymphocyte, T Lymphocyte
chr1	46347931	46348538	ATAC_chr1_46347931_46348538	ZBED1	B Lymphocyte
chr1	46347931	46348538	ATAC_chr1_46347931_46348538	ZBTB11	Erythroblast
chr1	46347931	46348538	ATAC_chr1_46347931_46348538	ZBTB2	B Lymphocyte
chr1	46347931	46348538	ATAC_chr1_46347931_46348538	ZBTB33	Erythroblast
chr1	46347931	46348538	ATAC_chr1_46347931_46348538	ZBTB40	Erythroblast, B Lymphocyte
chr1	46347931	46348538	ATAC_chr1_46347931_46348538	ZBTB7A	Erythroblast
chr1	46347931	46348538	ATAC_chr1_46347931_46348538	ZC3H8	Erythroblast
chr1	46347931	46348538	ATAC_chr1_46347931_46348538	ZEB2	Erythroblast
chr1	46347931	46348538	ATAC_chr1_46347931_46348538	ZFX	Erythroblast
chr1	46347931	46348538	ATAC_chr1_46347931_46348538	ZKSCAN1	Erythroblast
chr1	46347931	46348538	ATAC_chr1_46347931_46348538	ZKSCAN8	Erythroblast
chr1	46347931	46348538	ATAC_chr1_46347931_46348538	ZMIZ1	Erythroblast
chr1	46347931	46348538	ATAC_chr1_46347931_46348538	ZMYM3	Erythroblast
chr1	46347931	46348538	ATAC_chr1_46347931_46348538	ZNF143	B Lymphocyte, Erythroblast, Embryonic Stem Cell
chr1	46347931	46348538	ATAC_chr1_46347931_46348538	ZNF175	Erythroblast
chr1	46347931	46348538	ATAC_chr1_46347931_46348538	ZNF18	Erythroblast
chr1	46347931	46348538	ATAC_chr1_46347931_46348538	ZNF197	Erythroblast
chr1	46347931	46348538	ATAC_chr1_46347931_46348538	ZNF24	Erythroblast
chr1	46347931	46348538	ATAC_chr1_46347931_46348538	ZNF318	Erythroblast
chr1	46347931	46348538	ATAC_chr1_46347931_46348538	ZNF384	Erythroblast, B Lymphocyte
chr1	46347931	46348538	ATAC_chr1_46347931_46348538	ZNF410	Erythroblast
chr1	46347931	46348538	ATAC_chr1_46347931_46348538	ZNF584	Erythroblast
chr1	46347931	46348538	ATAC_chr1_46347931_46348538	ZNF589	Erythroblast
chr1	46347931	46348538	ATAC_chr1_46347931_46348538	ZNF639	Erythroblast
chr1	46347931	46348538	ATAC_chr1_46347931_46348538	ZNF644	Erythroblast
chr1	46347931	46348538	ATAC_chr1_46347931_46348538	ZNF740	Erythroblast
chr1	46347931	46348538	ATAC_chr1_46347931_46348538	ZNF766	Erythroblast
chr1	46347931	46348538	ATAC_chr1_46347931_46348538	ZSCAN29	Erythroblast
chr1	67274610	67275186	ATAC_chr1_67274610_67275186	AFF4	Th1
chr1	67274610	67275186	ATAC_chr1_67274610_67275186	ATF2	B Lymphocyte
chr1	67274610	67275186	ATAC_chr1_67274610_67275186	BATF	B Lymphocyte
chr1	67274610	67275186	ATAC_chr1_67274610_67275186	BCL11A	B Lymphocyte
chr1	67274610	67275186	ATAC_chr1_67274610_67275186	BCL3	B Lymphocyte
chr1	67274610	67275186	ATAC_chr1_67274610_67275186	BCL6	T Lymphocyte
chr1	67274610	67275186	ATAC_chr1_67274610_67275186	BCLAF1	B Lymphocyte
chr1	67274610	67275186	ATAC_chr1_67274610_67275186	BHLHE40	B Lymphocyte
chr1	67274610	67275186	ATAC_chr1_67274610_67275186	BRD4	Th1
chr1	67274610	67275186	ATAC_chr1_67274610_67275186	CBX5	B Lymphocyte
chr1	67274610	67275186	ATAC_chr1_67274610_67275186	CDK9	Th1, T Lymphoblast, Th2
chr1	67274610	67275186	ATAC_chr1_67274610_67275186	CEBPB	B Lymphocyte
chr1	67274610	67275186	ATAC_chr1_67274610_67275186	CHD2	B Lymphocyte
chr1	67274610	67275186	ATAC_chr1_67274610_67275186	CREB1	B Lymphocyte
chr1	67274610	67275186	ATAC_chr1_67274610_67275186	CTCF	Lymphoblastoid
chr1	67274610	67275186	ATAC_chr1_67274610_67275186	EBF1	B Lymphocyte
chr1	67274610	67275186	ATAC_chr1_67274610_67275186	EP300	B Lymphocyte
chr1	67274610	67275186	ATAC_chr1_67274610_67275186	ETV6	B Lymphocyte
chr1	67274610	67275186	ATAC_chr1_67274610_67275186	FOXM1	B Lymphocyte
chr1	67274610	67275186	ATAC_chr1_67274610_67275186	GATA3	Th2, Th1, T Lymphocyte
chr1	67274610	67275186	ATAC_chr1_67274610_67275186	HDAC6	T Lymphocyte
chr1	67274610	67275186	ATAC_chr1_67274610_67275186	IKZF1	B Lymphocyte
chr1	67274610	67275186	ATAC_chr1_67274610_67275186	IRF4	B Lymphocyte
chr1	67274610	67275186	ATAC_chr1_67274610_67275186	JUNB	B Lymphocyte
chr1	67274610	67275186	ATAC_chr1_67274610_67275186	JUND	B Lymphocyte
chr1	67274610	67275186	ATAC_chr1_67274610_67275186	KMT2A	Monocyte
chr1	67274610	67275186	ATAC_chr1_67274610_67275186	MAF	Th2, Th1
chr1	67274610	67275186	ATAC_chr1_67274610_67275186	MED1	Th1
chr1	67274610	67275186	ATAC_chr1_67274610_67275186	MEF2A	B Lymphocyte
chr1	67274610	67275186	ATAC_chr1_67274610_67275186	MEF2C	B Lymphocyte
chr1	67274610	67275186	ATAC_chr1_67274610_67275186	MTA2	B Lymphocyte
chr1	67274610	67275186	ATAC_chr1_67274610_67275186	MTA3	B Lymphocyte
chr1	67274610	67275186	ATAC_chr1_67274610_67275186	MXI1	B Lymphocyte
chr1	67274610	67275186	ATAC_chr1_67274610_67275186	MYB	Th1, Th2
chr1	67274610	67275186	ATAC_chr1_67274610_67275186	NFATC1	B Lymphocyte
chr1	67274610	67275186	ATAC_chr1_67274610_67275186	NFIC	B Lymphocyte
chr1	67274610	67275186	ATAC_chr1_67274610_67275186	PAX5	Lymphoblastoid, B Lymphocyte
chr1	67274610	67275186	ATAC_chr1_67274610_67275186	PML	B Lymphocyte
chr1	67274610	67275186	ATAC_chr1_67274610_67275186	POLR2A	Th1, T Lymphocyte, Th2, Lymphoblastoid
chr1	67274610	67275186	ATAC_chr1_67274610_67275186	POU2F2	B Lymphocyte, Lymphoblastoid
chr1	67274610	67275186	ATAC_chr1_67274610_67275186	RAD21	B Lymphocyte
chr1	67274610	67275186	ATAC_chr1_67274610_67275186	RBPJ	Lymphocyte
chr1	67274610	67275186	ATAC_chr1_67274610_67275186	RELA	Lymphoblastoid, B Lymphocyte, Th1
chr1	67274610	67275186	ATAC_chr1_67274610_67275186	RFX5	B Lymphocyte
chr1	67274610	67275186	ATAC_chr1_67274610_67275186	RUNX3	B Lymphocyte
chr1	67274610	67275186	ATAC_chr1_67274610_67275186	RXRA	B Lymphocyte
chr1	67274610	67275186	ATAC_chr1_67274610_67275186	SMARCA4	T Lymphocyte
chr1	67274610	67275186	ATAC_chr1_67274610_67275186	SP1	B Lymphocyte
chr1	67274610	67275186	ATAC_chr1_67274610_67275186	SPI1	Lymphoblastoid, B Lymphocyte
chr1	67274610	67275186	ATAC_chr1_67274610_67275186	SRF	B Lymphocyte
chr1	67274610	67275186	ATAC_chr1_67274610_67275186	STAG1	Lymphoblastoid
chr1	67274610	67275186	ATAC_chr1_67274610_67275186	STAT3	T Lymphocyte
chr1	67274610	67275186	ATAC_chr1_67274610_67275186	STAT4	Lymphocyte
chr1	67274610	67275186	ATAC_chr1_67274610_67275186	STAT5A	B Lymphocyte
chr1	67274610	67275186	ATAC_chr1_67274610_67275186	STAT5B	T Lymphocyte, Lymphocyte
chr1	67274610	67275186	ATAC_chr1_67274610_67275186	T	Th1
chr1	67274610	67275186	ATAC_chr1_67274610_67275186	TAL1	T Lymphoblast
chr1	67274610	67275186	ATAC_chr1_67274610_67275186	TARDBP	B Lymphocyte
chr1	67274610	67275186	ATAC_chr1_67274610_67275186	TBL1XR1	B Lymphocyte
chr1	67274610	67275186	ATAC_chr1_67274610_67275186	TBP	B Lymphocyte
chr1	67274610	67275186	ATAC_chr1_67274610_67275186	TBX21	B Lymphocyte, Th1
chr1	67274610	67275186	ATAC_chr1_67274610_67275186	TCF12	B Lymphocyte
chr1	67274610	67275186	ATAC_chr1_67274610_67275186	TRIM22	B Lymphocyte
chr1	67274610	67275186	ATAC_chr1_67274610_67275186	VDR	Lymphocyte
chr1	67274610	67275186	ATAC_chr1_67274610_67275186	ZBED1	B Lymphocyte
chr1	67274610	67275186	ATAC_chr1_67274610_67275186	ZNF384	B Lymphocyte
chr1	67274610	67275186	ATAC_chr1_67274610_67275186	ZNF597	B Lymphocyte
chr1	67334857	67337572	ATAC_chr1_67334857_67337572	ARID5B	T Lymphocyte
chr1	67334857	67337572	ATAC_chr1_67334857_67337572	BHLHE40	Erythroblast
chr1	67334857	67337572	ATAC_chr1_67334857_67337572	BRD4	T Lymphocyte, T Lymphoblast, Th1
chr1	67334857	67337572	ATAC_chr1_67334857_67337572	CDK7	T Lymphocyte
chr1	67334857	67337572	ATAC_chr1_67334857_67337572	CDK9	T Lymphoblast, Th1
chr1	67334857	67337572	ATAC_chr1_67334857_67337572	CREBBP	T Lymphocyte
chr1	67334857	67337572	ATAC_chr1_67334857_67337572	CTCF	T Lymphocyte, Erythroblast, Lymphoblastoid, Embryonic Stem Cell
chr1	67334857	67337572	ATAC_chr1_67334857_67337572	ERG	T Lymphocyte
chr1	67334857	67337572	ATAC_chr1_67334857_67337572	ETS1	T Lymphocyte
chr1	67334857	67337572	ATAC_chr1_67334857_67337572	FOS	Erythroblast
chr1	67334857	67337572	ATAC_chr1_67334857_67337572	GABPA	T Lymphocyte, Erythroblast
chr1	67334857	67337572	ATAC_chr1_67334857_67337572	GATA3	Th1, T Lymphocyte, Th2, T cell leukemia
chr1	67334857	67337572	ATAC_chr1_67334857_67337572	GLI2	Monocyte
chr1	67334857	67337572	ATAC_chr1_67334857_67337572	H2AZ	Embryonic Stem Cell
chr1	67334857	67337572	ATAC_chr1_67334857_67337572	HDAC1	B cell precursor
chr1	67334857	67337572	ATAC_chr1_67334857_67337572	HSF1	Leukemia Cell
chr1	67334857	67337572	ATAC_chr1_67334857_67337572	IKZF1	Erythroblast
chr1	67334857	67337572	ATAC_chr1_67334857_67337572	LMO1	T Lymphocyte
chr1	67334857	67337572	ATAC_chr1_67334857_67337572	MAX	Erythroblast, Embryonic Stem Cell
chr1	67334857	67337572	ATAC_chr1_67334857_67337572	MED1	T Lymphocyte
chr1	67334857	67337572	ATAC_chr1_67334857_67337572	MYB	T Lymphocyte, T Lymphoblast
chr1	67334857	67337572	ATAC_chr1_67334857_67337572	MYC	T Lymphocyte
chr1	67334857	67337572	ATAC_chr1_67334857_67337572	NR3C1	Macrophage
chr1	67334857	67337572	ATAC_chr1_67334857_67337572	POLR2A	B Lymphocyte, Lymphoblastoid, T Lymphocyte, Th1, Embryonic Stem Cell, Th2
chr1	67334857	67337572	ATAC_chr1_67334857_67337572	RAD21	Embryonic Stem Cell
chr1	67334857	67337572	ATAC_chr1_67334857_67337572	RBPJ	Lymphoblastoid, T Lymphocyte
chr1	67334857	67337572	ATAC_chr1_67334857_67337572	RELA	Lymphoblastoid, Th1
chr1	67334857	67337572	ATAC_chr1_67334857_67337572	RELB	Lymphoblastoid
chr1	67334857	67337572	ATAC_chr1_67334857_67337572	RUNX1	T Lymphocyte
chr1	67334857	67337572	ATAC_chr1_67334857_67337572	SMARCA4	CD36 Cell
chr1	67334857	67337572	ATAC_chr1_67334857_67337572	SUPT5H	Leukemia
chr1	67334857	67337572	ATAC_chr1_67334857_67337572	T	Th1, Monocyte
chr1	67334857	67337572	ATAC_chr1_67334857_67337572	TAL1	T Lymphoblast, T cell leukemia, T Lymphocyte
chr1	67334857	67337572	ATAC_chr1_67334857_67337572	TCF12	T cell leukemia
chr1	67334857	67337572	ATAC_chr1_67334857_67337572	TCF7L1	T cell leukemia
chr1	67334857	67337572	ATAC_chr1_67334857_67337572	TRIM28	Embryonic Stem Cell
chr1	67334857	67337572	ATAC_chr1_67334857_67337572	USF2	B Lymphocyte
chr1	91751966	91752986	ATAC_chr1_91751966_91752986	ATF2	B Lymphocyte
chr1	91751966	91752986	ATAC_chr1_91751966_91752986	BATF	B Lymphocyte
chr1	91751966	91752986	ATAC_chr1_91751966_91752986	BATF3	B Lymphocyte
chr1	91751966	91752986	ATAC_chr1_91751966_91752986	BCL11A	B Lymphocyte
chr1	91751966	91752986	ATAC_chr1_91751966_91752986	BCL3	B Lymphocyte
chr1	91751966	91752986	ATAC_chr1_91751966_91752986	BCLAF1	B Lymphocyte
chr1	91751966	91752986	ATAC_chr1_91751966_91752986	BHLHE40	B Lymphocyte
chr1	91751966	91752986	ATAC_chr1_91751966_91752986	BRD4	Lymphoblastoid
chr1	91751966	91752986	ATAC_chr1_91751966_91752986	CBFB	B Lymphocyte
chr1	91751966	91752986	ATAC_chr1_91751966_91752986	CBX5	B Lymphocyte
chr1	91751966	91752986	ATAC_chr1_91751966_91752986	CEBPA	B Lymphocyte
chr1	91751966	91752986	ATAC_chr1_91751966_91752986	CEBPB	B Lymphocyte
chr1	91751966	91752986	ATAC_chr1_91751966_91752986	CHD2	B Lymphocyte
chr1	91751966	91752986	ATAC_chr1_91751966_91752986	CREB1	B Lymphocyte
chr1	91751966	91752986	ATAC_chr1_91751966_91752986	CTCF	Lymphoblastoid
chr1	91751966	91752986	ATAC_chr1_91751966_91752986	EBF1	B Lymphocyte
chr1	91751966	91752986	ATAC_chr1_91751966_91752986	EBNA3C	B Lymphocyte
chr1	91751966	91752986	ATAC_chr1_91751966_91752986	EED	B Lymphocyte
chr1	91751966	91752986	ATAC_chr1_91751966_91752986	EP300	B Lymphocyte
chr1	91751966	91752986	ATAC_chr1_91751966_91752986	ETS1	B Lymphocyte
chr1	91751966	91752986	ATAC_chr1_91751966_91752986	ETV6	B Lymphocyte
chr1	91751966	91752986	ATAC_chr1_91751966_91752986	FOXM1	B Lymphocyte
chr1	91751966	91752986	ATAC_chr1_91751966_91752986	FOXP1	B Lymphocyte
chr1	91751966	91752986	ATAC_chr1_91751966_91752986	GATA3	Th2, Th1
chr1	91751966	91752986	ATAC_chr1_91751966_91752986	H2AZ	B Lymphocyte
chr1	91751966	91752986	ATAC_chr1_91751966_91752986	HDAC6	T Lymphocyte
chr1	91751966	91752986	ATAC_chr1_91751966_91752986	HMBOX1	Erythroblast
chr1	91751966	91752986	ATAC_chr1_91751966_91752986	HMG20A	B Lymphocyte
chr1	91751966	91752986	ATAC_chr1_91751966_91752986	IKZF1	B Lymphocyte
chr1	91751966	91752986	ATAC_chr1_91751966_91752986	IRF4	B Lymphocyte
chr1	91751966	91752986	ATAC_chr1_91751966_91752986	JUNB	B Lymphocyte
chr1	91751966	91752986	ATAC_chr1_91751966_91752986	JUND	B Lymphocyte
chr1	91751966	91752986	ATAC_chr1_91751966_91752986	MAF	Th2
chr1	91751966	91752986	ATAC_chr1_91751966_91752986	MAZ	B Lymphocyte
chr1	91751966	91752986	ATAC_chr1_91751966_91752986	MED1	Th1, B Lymphocyte
chr1	91751966	91752986	ATAC_chr1_91751966_91752986	MEF2A	B Lymphocyte
chr1	91751966	91752986	ATAC_chr1_91751966_91752986	MEF2C	B Lymphocyte
chr1	91751966	91752986	ATAC_chr1_91751966_91752986	MTA2	B Lymphocyte
chr1	91751966	91752986	ATAC_chr1_91751966_91752986	MTA3	B Lymphocyte
chr1	91751966	91752986	ATAC_chr1_91751966_91752986	MYB	Th2
chr1	91751966	91752986	ATAC_chr1_91751966_91752986	NFATC1	B Lymphocyte
chr1	91751966	91752986	ATAC_chr1_91751966_91752986	NFIC	B Lymphocyte
chr1	91751966	91752986	ATAC_chr1_91751966_91752986	NIPBL	B Lymphocyte, Lymphoblastoid
chr1	91751966	91752986	ATAC_chr1_91751966_91752986	PAX5	B Lymphocyte
chr1	91751966	91752986	ATAC_chr1_91751966_91752986	PBX3	B Lymphocyte
chr1	91751966	91752986	ATAC_chr1_91751966_91752986	PML	B Lymphocyte
chr1	91751966	91752986	ATAC_chr1_91751966_91752986	POLR2A	Th1, B cell lymphoma, T Lymphocyte, Th2, Lymphoblastoid, B Lymphocyte
chr1	91751966	91752986	ATAC_chr1_91751966_91752986	POU2F2	B Lymphocyte, Lymphoblastoid
chr1	91751966	91752986	ATAC_chr1_91751966_91752986	RAD21	B Lymphocyte
chr1	91751966	91752986	ATAC_chr1_91751966_91752986	RBPJ	Lymphoblastoid
chr1	91751966	91752986	ATAC_chr1_91751966_91752986	RCOR1	B Lymphocyte
chr1	91751966	91752986	ATAC_chr1_91751966_91752986	REL	Lymphoblastoid
chr1	91751966	91752986	ATAC_chr1_91751966_91752986	RELA	Lymphoblastoid, B Lymphocyte, Th1
chr1	91751966	91752986	ATAC_chr1_91751966_91752986	RELB	Lymphoblastoid
chr1	91751966	91752986	ATAC_chr1_91751966_91752986	REST	B Lymphocyte
chr1	91751966	91752986	ATAC_chr1_91751966_91752986	RUNX3	B Lymphocyte
chr1	91751966	91752986	ATAC_chr1_91751966_91752986	RXRA	B Lymphocyte
chr1	91751966	91752986	ATAC_chr1_91751966_91752986	SMC1A	B Lymphocyte
chr1	91751966	91752986	ATAC_chr1_91751966_91752986	SMC3	B Lymphocyte
chr1	91751966	91752986	ATAC_chr1_91751966_91752986	SP1	B Lymphocyte
chr1	91751966	91752986	ATAC_chr1_91751966_91752986	SPI1	Lymphoblastoid, B Lymphocyte
chr1	91751966	91752986	ATAC_chr1_91751966_91752986	SPIB	B Lymphocyte
chr1	91751966	91752986	ATAC_chr1_91751966_91752986	SRF	B Lymphocyte
chr1	91751966	91752986	ATAC_chr1_91751966_91752986	STAG1	Lymphoblastoid, B Lymphocyte
chr1	91751966	91752986	ATAC_chr1_91751966_91752986	STAT3	B Lymphocyte
chr1	91751966	91752986	ATAC_chr1_91751966_91752986	STAT5A	B Lymphocyte
chr1	91751966	91752986	ATAC_chr1_91751966_91752986	STAT5B	T Lymphocyte, Lymphocyte
chr1	91751966	91752986	ATAC_chr1_91751966_91752986	T	Th1
chr1	91751966	91752986	ATAC_chr1_91751966_91752986	TBL1XR1	B Lymphocyte
chr1	91751966	91752986	ATAC_chr1_91751966_91752986	TBX21	B Lymphocyte
chr1	91751966	91752986	ATAC_chr1_91751966_91752986	TCF12	B Lymphocyte
chr1	91751966	91752986	ATAC_chr1_91751966_91752986	TCF7L1	B Lymphocyte
chr1	91751966	91752986	ATAC_chr1_91751966_91752986	VDR	Lymphocyte
chr1	91751966	91752986	ATAC_chr1_91751966_91752986	YY1	Lymphoblastoid, B Lymphocyte
chr1	91751966	91752986	ATAC_chr1_91751966_91752986	ZBED1	B Lymphocyte
chr1	91751966	91752986	ATAC_chr1_91751966_91752986	ZBTB40	B Lymphocyte
chr1	91751966	91752986	ATAC_chr1_91751966_91752986	ZNF384	B Lymphocyte
chr1	91751966	91752986	ATAC_chr1_91751966_91752986	ZNF597	B Lymphocyte
chr1	91753525	91754982	ATAC_chr1_91753525_91754982	AFF4	Th1
chr1	91753525	91754982	ATAC_chr1_91753525_91754982	ATF2	B Lymphocyte
chr1	91753525	91754982	ATAC_chr1_91753525_91754982	BATF	B Lymphocyte
chr1	91753525	91754982	ATAC_chr1_91753525_91754982	BCL11A	B Lymphocyte
chr1	91753525	91754982	ATAC_chr1_91753525_91754982	BCL6	T Lymphocyte
chr1	91753525	91754982	ATAC_chr1_91753525_91754982	BHLHE40	B Lymphocyte, Erythroblast
chr1	91753525	91754982	ATAC_chr1_91753525_91754982	BRD4	Lymphoblastoid, Th1
chr1	91753525	91754982	ATAC_chr1_91753525_91754982	CEBPB	B Lymphocyte
chr1	91753525	91754982	ATAC_chr1_91753525_91754982	CREB1	B Lymphocyte
chr1	91753525	91754982	ATAC_chr1_91753525_91754982	CTCF	Lymphoblastoid
chr1	91753525	91754982	ATAC_chr1_91753525_91754982	EBF1	B Lymphocyte
chr1	91753525	91754982	ATAC_chr1_91753525_91754982	EED	B Lymphocyte
chr1	91753525	91754982	ATAC_chr1_91753525_91754982	EGR1	Erythroblast, B Lymphocyte
chr1	91753525	91754982	ATAC_chr1_91753525_91754982	EP300	B Lymphocyte
chr1	91753525	91754982	ATAC_chr1_91753525_91754982	ETV6	B Lymphocyte
chr1	91753525	91754982	ATAC_chr1_91753525_91754982	FOS	Erythroblast
chr1	91753525	91754982	ATAC_chr1_91753525_91754982	FOSL1	Erythroblast
chr1	91753525	91754982	ATAC_chr1_91753525_91754982	FOXM1	B Lymphocyte
chr1	91753525	91754982	ATAC_chr1_91753525_91754982	GATA3	Th1
chr1	91753525	91754982	ATAC_chr1_91753525_91754982	HDAC6	T Lymphocyte
chr1	91753525	91754982	ATAC_chr1_91753525_91754982	IKZF1	B Lymphocyte
chr1	91753525	91754982	ATAC_chr1_91753525_91754982	IRF1	Erythroblast
chr1	91753525	91754982	ATAC_chr1_91753525_91754982	IRF4	B Lymphocyte
chr1	91753525	91754982	ATAC_chr1_91753525_91754982	JUN	Erythroblast
chr1	91753525	91754982	ATAC_chr1_91753525_91754982	JUNB	B Lymphocyte
chr1	91753525	91754982	ATAC_chr1_91753525_91754982	JUND	Erythroblast
chr1	91753525	91754982	ATAC_chr1_91753525_91754982	MAF	Th1
chr1	91753525	91754982	ATAC_chr1_91753525_91754982	MED1	Th1
chr1	91753525	91754982	ATAC_chr1_91753525_91754982	MEF2A	B Lymphocyte
chr1	91753525	91754982	ATAC_chr1_91753525_91754982	MTA2	B Lymphocyte
chr1	91753525	91754982	ATAC_chr1_91753525_91754982	MTA3	B Lymphocyte
chr1	91753525	91754982	ATAC_chr1_91753525_91754982	MYB	Th1
chr1	91753525	91754982	ATAC_chr1_91753525_91754982	NFATC1	B Lymphocyte
chr1	91753525	91754982	ATAC_chr1_91753525_91754982	NFIC	B Lymphocyte
chr1	91753525	91754982	ATAC_chr1_91753525_91754982	NIPBL	Lymphoblastoid
chr1	91753525	91754982	ATAC_chr1_91753525_91754982	PAX5	B Lymphocyte
chr1	91753525	91754982	ATAC_chr1_91753525_91754982	PML	B Lymphocyte
chr1	91753525	91754982	ATAC_chr1_91753525_91754982	POLR2A	Th1, T Lymphocyte, Th2
chr1	91753525	91754982	ATAC_chr1_91753525_91754982	POU2F2	Lymphoblastoid
chr1	91753525	91754982	ATAC_chr1_91753525_91754982	RAD21	B Lymphocyte
chr1	91753525	91754982	ATAC_chr1_91753525_91754982	RCOR1	Erythroblast
chr1	91753525	91754982	ATAC_chr1_91753525_91754982	RELA	Lymphoblastoid, Th1
chr1	91753525	91754982	ATAC_chr1_91753525_91754982	RFX1	Erythroblast
chr1	91753525	91754982	ATAC_chr1_91753525_91754982	RUNX3	B Lymphocyte
chr1	91753525	91754982	ATAC_chr1_91753525_91754982	SMARCB1	Embryonic Stem Cell
chr1	91753525	91754982	ATAC_chr1_91753525_91754982	SRF	B Lymphocyte
chr1	91753525	91754982	ATAC_chr1_91753525_91754982	STAG1	Lymphoblastoid, B Lymphocyte
chr1	91753525	91754982	ATAC_chr1_91753525_91754982	STAT5B	T Lymphocyte
chr1	91753525	91754982	ATAC_chr1_91753525_91754982	T	Th1
chr1	91753525	91754982	ATAC_chr1_91753525_91754982	TBL1XR1	B Lymphocyte
chr1	91753525	91754982	ATAC_chr1_91753525_91754982	TBP	B Lymphocyte
chr1	91753525	91754982	ATAC_chr1_91753525_91754982	TBX21	B Lymphocyte
chr1	91753525	91754982	ATAC_chr1_91753525_91754982	TCF12	B Lymphocyte
chr1	91753525	91754982	ATAC_chr1_91753525_91754982	TCF7L1	B Lymphocyte
chr1	91753525	91754982	ATAC_chr1_91753525_91754982	USF1	Erythroblast
chr1	91753525	91754982	ATAC_chr1_91753525_91754982	USF2	B Lymphocyte
chr1	91753525	91754982	ATAC_chr1_91753525_91754982	VDR	Lymphocyte
chr1	91753525	91754982	ATAC_chr1_91753525_91754982	WRNIP1	B Lymphocyte
chr1	91753525	91754982	ATAC_chr1_91753525_91754982	ZBED1	B Lymphocyte
chr1	91753525	91754982	ATAC_chr1_91753525_91754982	ZBTB40	B Lymphocyte
chr1	116506152	116506738	ATAC_chr1_116506152_116506738	BATF	B Lymphocyte
chr1	116506152	116506738	ATAC_chr1_116506152_116506738	BATF3	B Lymphocyte
chr1	116506152	116506738	ATAC_chr1_116506152_116506738	EBF1	B Lymphocyte
chr1	116506152	116506738	ATAC_chr1_116506152_116506738	EGR1	Erythroblast
chr1	116506152	116506738	ATAC_chr1_116506152_116506738	FOS	Erythroblast
chr1	116506152	116506738	ATAC_chr1_116506152_116506738	HMBOX1	Erythroblast
chr1	116506152	116506738	ATAC_chr1_116506152_116506738	IRF4	B Lymphocyte
chr1	116506152	116506738	ATAC_chr1_116506152_116506738	JUNB	B Lymphocyte
chr1	116506152	116506738	ATAC_chr1_116506152_116506738	NFYB	B Lymphocyte
chr1	116506152	116506738	ATAC_chr1_116506152_116506738	POLR2A	B Lymphocyte
chr1	116506152	116506738	ATAC_chr1_116506152_116506738	TBP	B Lymphocyte
chr1	150925486	150926850	ATAC_chr1_150925486_150926850	ADNP	Erythroblast
chr1	150925486	150926850	ATAC_chr1_150925486_150926850	AFF1	B Lymphocyte
chr1	150925486	150926850	ATAC_chr1_150925486_150926850	AFF4	Th1
chr1	150925486	150926850	ATAC_chr1_150925486_150926850	ARID5B	T Lymphocyte
chr1	150925486	150926850	ATAC_chr1_150925486_150926850	ARNT	Erythroblast
chr1	150925486	150926850	ATAC_chr1_150925486_150926850	ATF1	Erythroblast
chr1	150925486	150926850	ATAC_chr1_150925486_150926850	ATF2	B Lymphocyte, Embryonic Stem Cell
chr1	150925486	150926850	ATAC_chr1_150925486_150926850	ATF3	Erythroblast, B Lymphocyte, Embryonic Stem Cell
chr1	150925486	150926850	ATAC_chr1_150925486_150926850	BACH1	Erythroblast
chr1	150925486	150926850	ATAC_chr1_150925486_150926850	BCL11A	B Lymphocyte, Embryonic Stem Cell
chr1	150925486	150926850	ATAC_chr1_150925486_150926850	BCL3	B Lymphocyte
chr1	150925486	150926850	ATAC_chr1_150925486_150926850	BCL6	B Lymphocyte, Haematopoietic Progenitor Cell, B cell lymphoma, T Lymphocyte
chr1	150925486	150926850	ATAC_chr1_150925486_150926850	BCLAF1	Erythroblast, B Lymphocyte
chr1	150925486	150926850	ATAC_chr1_150925486_150926850	BCOR	B cell lymphoma, B Lymphocyte, Erythroblast, hESC
chr1	150925486	150926850	ATAC_chr1_150925486_150926850	BHLHE40	Erythroblast, B Lymphocyte
chr1	150925486	150926850	ATAC_chr1_150925486_150926850	BMI1	Erythroblast
chr1	150925486	150926850	ATAC_chr1_150925486_150926850	BPTF	Erythroid Cell
chr1	150925486	150926850	ATAC_chr1_150925486_150926850	BRCA1	B Lymphocyte
chr1	150925486	150926850	ATAC_chr1_150925486_150926850	BRD2	B Lymphocyte
chr1	150925486	150926850	ATAC_chr1_150925486_150926850	BRD3	B Lymphocyte
chr1	150925486	150926850	ATAC_chr1_150925486_150926850	BRD4	Lymphoblastoid, B Lymphocyte, Myeloid Cell, T Lymphocyte, Leukemia Cell, T Lymphoblast, B cell lymphoma, Embryonic Stem Cell, Erythroblast, Th1, Plasma Cell, Plasmacytoid dendritic cell, Acute myeloid leukemia
chr1	150925486	150926850	ATAC_chr1_150925486_150926850	BRD9	Acute myeloid leukemia
chr1	150925486	150926850	ATAC_chr1_150925486_150926850	C11orf30	Erythroblast
chr1	150925486	150926850	ATAC_chr1_150925486_150926850	CBFB	B Lymphocyte
chr1	150925486	150926850	ATAC_chr1_150925486_150926850	CBX1	Erythroblast
chr1	150925486	150926850	ATAC_chr1_150925486_150926850	CBX3	Erythroblast
chr1	150925486	150926850	ATAC_chr1_150925486_150926850	CBX5	B Lymphocyte
chr1	150925486	150926850	ATAC_chr1_150925486_150926850	CCND2	B Lymphocyte
chr1	150925486	150926850	ATAC_chr1_150925486_150926850	CCNT2	Erythroblast
chr1	150925486	150926850	ATAC_chr1_150925486_150926850	CD74	B Lymphocyte
chr1	150925486	150926850	ATAC_chr1_150925486_150926850	CDC5L	Erythroblast
chr1	150925486	150926850	ATAC_chr1_150925486_150926850	CDK12	T Lymphocyte
chr1	150925486	150926850	ATAC_chr1_150925486_150926850	CDK7	B Lymphocyte, T Lymphocyte
chr1	150925486	150926850	ATAC_chr1_150925486_150926850	CDK8	Myeloid Cell, B Lymphocyte, Megakaryoblastic, Erythroblast, Macrophage
chr1	150925486	150926850	ATAC_chr1_150925486_150926850	CDK9	Plasma Cell, Acute myeloid leukemia, T Lymphoblast, B Lymphocyte, Th1, Th2, B cell lymphoma
chr1	150925486	150926850	ATAC_chr1_150925486_150926850	CEBPA	B Lymphocyte
chr1	150925486	150926850	ATAC_chr1_150925486_150926850	CEBPB	Erythroblast, Embryonic Stem Cell, B Lymphocyte
chr1	150925486	150926850	ATAC_chr1_150925486_150926850	CEBPD	Erythroblast
chr1	150925486	150926850	ATAC_chr1_150925486_150926850	CEBPG	Erythroblast
chr1	150925486	150926850	ATAC_chr1_150925486_150926850	CENPT	Lymphoblastoid
chr1	150925486	150926850	ATAC_chr1_150925486_150926850	CHAMP1	Erythroblast
chr1	150925486	150926850	ATAC_chr1_150925486_150926850	CHD1	B Lymphocyte, Erythroblast
chr1	150925486	150926850	ATAC_chr1_150925486_150926850	CHD2	Embryonic Stem Cell, Erythroblast, B Lymphocyte
chr1	150925486	150926850	ATAC_chr1_150925486_150926850	CHD7	Erythroblast
chr1	150925486	150926850	ATAC_chr1_150925486_150926850	CHD8	iPSC
chr1	150925486	150926850	ATAC_chr1_150925486_150926850	CREB1	B Lymphocyte, Erythroblast, Embryonic Stem Cell
chr1	150925486	150926850	ATAC_chr1_150925486_150926850	CREB3	Erythroblast
chr1	150925486	150926850	ATAC_chr1_150925486_150926850	CREBBP	T Lymphocyte, B Lymphocyte
chr1	150925486	150926850	ATAC_chr1_150925486_150926850	CSDE1	Erythroblast
chr1	150925486	150926850	ATAC_chr1_150925486_150926850	CTBP2	Embryonic Stem Cell
chr1	150925486	150926850	ATAC_chr1_150925486_150926850	CTCF	Lymphoblastoid, Macrophage, Erythroid Progenitor Cell, Hematopoietic stem and progenitor cell, B Lymphocyte, B cell lymphoma, Monocyte, Erythroblast, T Lymphocyte, Erythroid Cell, Embryonic Stem Cell, Proerythroblast
chr1	150925486	150926850	ATAC_chr1_150925486_150926850	CTCFL	Erythroblast
chr1	150925486	150926850	ATAC_chr1_150925486_150926850	CUX1	Erythroblast
chr1	150925486	150926850	ATAC_chr1_150925486_150926850	DDX20	Erythroblast
chr1	150925486	150926850	ATAC_chr1_150925486_150926850	DEAF1	Erythroblast
chr1	150925486	150926850	ATAC_chr1_150925486_150926850	DIDO1	Erythroblast
chr1	150925486	150926850	ATAC_chr1_150925486_150926850	DPF1	Erythroblast
chr1	150925486	150926850	ATAC_chr1_150925486_150926850	DPF2	Erythroblast
chr1	150925486	150926850	ATAC_chr1_150925486_150926850	E2F1	Multiple myeloma cell, B Lymphocyte
chr1	150925486	150926850	ATAC_chr1_150925486_150926850	E2F4	Erythroblast
chr1	150925486	150926850	ATAC_chr1_150925486_150926850	E2F5	Erythroblast
chr1	150925486	150926850	ATAC_chr1_150925486_150926850	E2F6	Erythroblast, Embryonic Stem Cell
chr1	150925486	150926850	ATAC_chr1_150925486_150926850	EBF1	B Lymphocyte
chr1	150925486	150926850	ATAC_chr1_150925486_150926850	EED	B Lymphocyte
chr1	150925486	150926850	ATAC_chr1_150925486_150926850	EGR1	Erythroblast, Embryonic Stem Cell, B Lymphocyte
chr1	150925486	150926850	ATAC_chr1_150925486_150926850	ELF1	Erythroblast, B Lymphocyte, Leukemia Cell
chr1	150925486	150926850	ATAC_chr1_150925486_150926850	ELK1	Erythroblast, B Lymphocyte
chr1	150925486	150926850	ATAC_chr1_150925486_150926850	EOMES	Embryonic Stem Cell
chr1	150925486	150926850	ATAC_chr1_150925486_150926850	EP300	B Lymphocyte, Leukemia Cell, Myeloblast, Acute myeloid leukemia, Embryonic Stem Cell, Stem cell, Progenitor Cells, Erythroblast, B cell lymphoma, T Lymphocyte, Pre-B Lymphocyte
chr1	150925486	150926850	ATAC_chr1_150925486_150926850	EPC1	Lymphoblast
chr1	150925486	150926850	ATAC_chr1_150925486_150926850	ERG	Hematopoietic Cell, T Lymphocyte, Leukemia Cell, Myeloblast, Acute myeloid leukemia, Haematopoietic Progenitor Cell, Erythroblast
chr1	150925486	150926850	ATAC_chr1_150925486_150926850	ESR1	Embryonic Stem Cell
chr1	150925486	150926850	ATAC_chr1_150925486_150926850	ESRRA	B Lymphocyte
chr1	150925486	150926850	ATAC_chr1_150925486_150926850	ETS1	T Lymphocyte, Erythroblast, iPSC, B Lymphocyte
chr1	150925486	150926850	ATAC_chr1_150925486_150926850	ETV1	Erythroblast
chr1	150925486	150926850	ATAC_chr1_150925486_150926850	ETV6	B Lymphocyte
chr1	150925486	150926850	ATAC_chr1_150925486_150926850	EZH1	Proerythroblast, Hematopoietic Cell
chr1	150925486	150926850	ATAC_chr1_150925486_150926850	EZH2	Multiple myeloma cell, Multiple myeloma, Erythroblast, iPSC
chr1	150925486	150926850	ATAC_chr1_150925486_150926850	FAIRE	Macrophage, Erythroblast, B Lymphocyte
chr1	150925486	150926850	ATAC_chr1_150925486_150926850	FAM208A	Leukemia
chr1	150925486	150926850	ATAC_chr1_150925486_150926850	FGFR1	iPSC
chr1	150925486	150926850	ATAC_chr1_150925486_150926850	FLI1	Myeloblast, Haematopoietic Progenitor Cell, Acute myeloid leukemia
chr1	150925486	150926850	ATAC_chr1_150925486_150926850	FOS	Erythroblast
chr1	150925486	150926850	ATAC_chr1_150925486_150926850	FOSL1	Erythroblast
chr1	150925486	150926850	ATAC_chr1_150925486_150926850	FOXA1	Embryonic Stem Cell
chr1	150925486	150926850	ATAC_chr1_150925486_150926850	FOXA2	Embryonic Stem Cell
chr1	150925486	150926850	ATAC_chr1_150925486_150926850	FOXJ2	Erythroblast
chr1	150925486	150926850	ATAC_chr1_150925486_150926850	FOXK2	Erythroblast
chr1	150925486	150926850	ATAC_chr1_150925486_150926850	FOXM1	B Lymphocyte
chr1	150925486	150926850	ATAC_chr1_150925486_150926850	FOXO1	Stromal Cell
chr1	150925486	150926850	ATAC_chr1_150925486_150926850	FOXO3	Erythroblast
chr1	150925486	150926850	ATAC_chr1_150925486_150926850	FOXP1	Embryonic Stem Cell
chr1	150925486	150926850	ATAC_chr1_150925486_150926850	GABPA	Erythroblast, T Lymphocyte, B Lymphocyte, Haematopoietic Progenitor Cell, Embryonic Stem Cell, Leukemia Cell
chr1	150925486	150926850	ATAC_chr1_150925486_150926850	GATA1	Erythroblast, Erythroid Cell, Hematopoietic stem and progenitor cell, Proerythroblast
chr1	150925486	150926850	ATAC_chr1_150925486_150926850	GATA2	Haematopoietic Progenitor Cell, Erythroblast
chr1	150925486	150926850	ATAC_chr1_150925486_150926850	GATA3	T Lymphocyte, Th1
chr1	150925486	150926850	ATAC_chr1_150925486_150926850	GATA4	Embryonic Stem Cell
chr1	150925486	150926850	ATAC_chr1_150925486_150926850	GLI2	Leukemia Cell
chr1	150925486	150926850	ATAC_chr1_150925486_150926850	GTF2B	Erythroblast
chr1	150925486	150926850	ATAC_chr1_150925486_150926850	GTF2E2	Erythroblast
chr1	150925486	150926850	ATAC_chr1_150925486_150926850	GTF2F1	Embryonic Stem Cell, Erythroblast
chr1	150925486	150926850	ATAC_chr1_150925486_150926850	H2AZ	CD14 cell, B Lymphocyte, Macrophage, T Lymphocyte, Monocyte, Erythroblast, Embryonic Stem Cell, Haematopoietic Progenitor Cell, Proerythroblast
chr1	150925486	150926850	ATAC_chr1_150925486_150926850	HCFC1	Erythroblast
chr1	150925486	150926850	ATAC_chr1_150925486_150926850	HDAC1	B Lymphocyte, Erythroblast, Acute myeloid leukemia, B cell precursor, Leukemia Cell, Erythroid progenitor
chr1	150925486	150926850	ATAC_chr1_150925486_150926850	HDAC2	Erythroblast, B Lymphocyte, Acute myeloid leukemia, Embryonic Stem Cell
chr1	150925486	150926850	ATAC_chr1_150925486_150926850	HDAC3	B Lymphocyte
chr1	150925486	150926850	ATAC_chr1_150925486_150926850	HDAC4	B Lymphocyte
chr1	150925486	150926850	ATAC_chr1_150925486_150926850	HDAC6	T Lymphocyte
chr1	150925486	150926850	ATAC_chr1_150925486_150926850	HDAC8	Erythroblast
chr1	150925486	150926850	ATAC_chr1_150925486_150926850	HDGF	B Lymphocyte, Erythroblast
chr1	150925486	150926850	ATAC_chr1_150925486_150926850	HES1	Erythroblast
chr1	150925486	150926850	ATAC_chr1_150925486_150926850	HEY1	Erythroblast
chr1	150925486	150926850	ATAC_chr1_150925486_150926850	HLTF	Erythroblast
chr1	150925486	150926850	ATAC_chr1_150925486_150926850	HMBOX1	Erythroblast
chr1	150925486	150926850	ATAC_chr1_150925486_150926850	HMGN1	T Lymphocyte
chr1	150925486	150926850	ATAC_chr1_150925486_150926850	HMGN3	Erythroblast
chr1	150925486	150926850	ATAC_chr1_150925486_150926850	HSF1	Leukemia Cell
chr1	150925486	150926850	ATAC_chr1_150925486_150926850	ID3	Erythroblast
chr1	150925486	150926850	ATAC_chr1_150925486_150926850	IKZF1	B Lymphocyte, Erythroblast, B cell precursor
chr1	150925486	150926850	ATAC_chr1_150925486_150926850	IRF1	Erythroblast, Monocyte
chr1	150925486	150926850	ATAC_chr1_150925486_150926850	IRF4	B Lymphocyte
chr1	150925486	150926850	ATAC_chr1_150925486_150926850	JARID2	iPSC
chr1	150925486	150926850	ATAC_chr1_150925486_150926850	JMJD1C	Myeloblast, Monocyte
chr1	150925486	150926850	ATAC_chr1_150925486_150926850	JUN	Erythroblast
chr1	150925486	150926850	ATAC_chr1_150925486_150926850	JUNB	Erythroblast
chr1	150925486	150926850	ATAC_chr1_150925486_150926850	JUND	Erythroblast, Embryonic Stem Cell
chr1	150925486	150926850	ATAC_chr1_150925486_150926850	KAT5	T Lymphocyte
chr1	150925486	150926850	ATAC_chr1_150925486_150926850	KAT8	T Lymphocyte, Erythroblast
chr1	150925486	150926850	ATAC_chr1_150925486_150926850	KDM1A	Erythroblast
chr1	150925486	150926850	ATAC_chr1_150925486_150926850	KDM2B	hESC, B Lymphocyte, B cell lymphoma
chr1	150925486	150926850	ATAC_chr1_150925486_150926850	KDM3A	T Lymphocyte
chr1	150925486	150926850	ATAC_chr1_150925486_150926850	KDM4A	Embryonic Stem Cell
chr1	150925486	150926850	ATAC_chr1_150925486_150926850	KDM4B	Erythroblast
chr1	150925486	150926850	ATAC_chr1_150925486_150926850	KDM5B	Erythroblast
chr1	150925486	150926850	ATAC_chr1_150925486_150926850	KDM6B	T Lymphocyte
chr1	150925486	150926850	ATAC_chr1_150925486_150926850	KLF1	Erythroid Cell
chr1	150925486	150926850	ATAC_chr1_150925486_150926850	KLF13	Erythroblast
chr1	150925486	150926850	ATAC_chr1_150925486_150926850	KLF16	Erythroblast
chr1	150925486	150926850	ATAC_chr1_150925486_150926850	KMT2A	B Lymphocyte, Monocyte, Leukemia Cell
chr1	150925486	150926850	ATAC_chr1_150925486_150926850	KMT2D	B Lymphocyte, B cell lymphoma
chr1	150925486	150926850	ATAC_chr1_150925486_150926850	L3MBTL2	Erythroblast
chr1	150925486	150926850	ATAC_chr1_150925486_150926850	LARP7	Erythroblast
chr1	150925486	150926850	ATAC_chr1_150925486_150926850	LEF1	Erythroblast
chr1	150925486	150926850	ATAC_chr1_150925486_150926850	LEO1	B Lymphocyte
chr1	150925486	150926850	ATAC_chr1_150925486_150926850	LMO1	T Lymphocyte
chr1	150925486	150926850	ATAC_chr1_150925486_150926850	LMO2	Myeloblast
chr1	150925486	150926850	ATAC_chr1_150925486_150926850	MAF	Th2, Th1
chr1	150925486	150926850	ATAC_chr1_150925486_150926850	MAFK	Erythroblast
chr1	150925486	150926850	ATAC_chr1_150925486_150926850	MAX	B cell lymphoma, B Lymphocyte, Erythroblast, Embryonic Stem Cell
chr1	150925486	150926850	ATAC_chr1_150925486_150926850	MAZ	B Lymphocyte, Erythroblast
chr1	150925486	150926850	ATAC_chr1_150925486_150926850	MBD2	Erythroblast
chr1	150925486	150926850	ATAC_chr1_150925486_150926850	MBTD1	Lymphoblast
chr1	150925486	150926850	ATAC_chr1_150925486_150926850	MCM3	Erythroblast
chr1	150925486	150926850	ATAC_chr1_150925486_150926850	MED1	Plasma Cell, B Lymphocyte, T Lymphocyte, Erythroblast, Th1, B cell lymphoma, Myeloid Cell, Embryonic Stem Cell
chr1	150925486	150926850	ATAC_chr1_150925486_150926850	MED12	Progenitor Cells
chr1	150925486	150926850	ATAC_chr1_150925486_150926850	MEF2A	B Lymphocyte, Erythroblast
chr1	150925486	150926850	ATAC_chr1_150925486_150926850	MEF2C	B Lymphocyte
chr1	150925486	150926850	ATAC_chr1_150925486_150926850	MEF2D	Erythroblast
chr1	150925486	150926850	ATAC_chr1_150925486_150926850	MIER1	Erythroblast
chr1	150925486	150926850	ATAC_chr1_150925486_150926850	MLLT1	Acute myeloid leukemia, Erythroblast, B Lymphocyte
chr1	150925486	150926850	ATAC_chr1_150925486_150926850	MTA2	B Lymphocyte, Erythroblast
chr1	150925486	150926850	ATAC_chr1_150925486_150926850	MTA3	B Lymphocyte
chr1	150925486	150926850	ATAC_chr1_150925486_150926850	MXI1	Embryonic Stem Cell, Erythroblast, B Lymphocyte
chr1	150925486	150926850	ATAC_chr1_150925486_150926850	MYB	T Lymphocyte, T Lymphoblast, Th1, Th2
chr1	150925486	150926850	ATAC_chr1_150925486_150926850	MYC	B Lymphocyte, B cell lymphoma, Erythroblast, Embryonic Stem Cell, T Lymphocyte, Plasma Cell
chr1	150925486	150926850	ATAC_chr1_150925486_150926850	MYNN	Erythroblast
chr1	150925486	150926850	ATAC_chr1_150925486_150926850	MYOG	Embryonic Stem Cell
chr1	150925486	150926850	ATAC_chr1_150925486_150926850	NANOG	Embryonic Stem Cell
chr1	150925486	150926850	ATAC_chr1_150925486_150926850	NBN	Erythroblast, B Lymphocyte
chr1	150925486	150926850	ATAC_chr1_150925486_150926850	NCOA1	Erythroblast
chr1	150925486	150926850	ATAC_chr1_150925486_150926850	NCOR1	Myeloblast
chr1	150925486	150926850	ATAC_chr1_150925486_150926850	NCOR2	B Lymphocyte, B cell lymphoma
chr1	150925486	150926850	ATAC_chr1_150925486_150926850	NELFE	Embryonic Stem Cell
chr1	150925486	150926850	ATAC_chr1_150925486_150926850	NFATC1	B Lymphocyte
chr1	150925486	150926850	ATAC_chr1_150925486_150926850	NFE2	Erythroid Cell, Proerythroblast, Erythroid Progenitor Cell
chr1	150925486	150926850	ATAC_chr1_150925486_150926850	NFIC	B Lymphocyte
chr1	150925486	150926850	ATAC_chr1_150925486_150926850	NFRKB	Erythroblast
chr1	150925486	150926850	ATAC_chr1_150925486_150926850	NFYA	Erythroblast
chr1	150925486	150926850	ATAC_chr1_150925486_150926850	NFYB	B Lymphocyte
chr1	150925486	150926850	ATAC_chr1_150925486_150926850	NIPBL	B Lymphocyte, Lymphoblastoid, Embryonic Stem Cell
chr1	150925486	150926850	ATAC_chr1_150925486_150926850	NKRF	Erythroblast
chr1	150925486	150926850	ATAC_chr1_150925486_150926850	NOTCH1	T Lymphocyte, Haematopoietic Progenitor Cell
chr1	150925486	150926850	ATAC_chr1_150925486_150926850	NR2C2	Erythroblast, B Lymphocyte
chr1	150925486	150926850	ATAC_chr1_150925486_150926850	NR2F1	Erythroblast
chr1	150925486	150926850	ATAC_chr1_150925486_150926850	NR2F2	Erythroblast, Stromal Cell
chr1	150925486	150926850	ATAC_chr1_150925486_150926850	NR2F6	Erythroblast
chr1	150925486	150926850	ATAC_chr1_150925486_150926850	NR3C1	Embryonic Stem Cell, B cell precursor
chr1	150925486	150926850	ATAC_chr1_150925486_150926850	NR4A1	Erythroblast, Acute myeloid leukemia
chr1	150925486	150926850	ATAC_chr1_150925486_150926850	NRF1	Erythroblast, B Lymphocyte, Embryonic Stem Cell
chr1	150925486	150926850	ATAC_chr1_150925486_150926850	NUP153	Erythroblast
chr1	150925486	150926850	ATAC_chr1_150925486_150926850	ORC2	Erythroblast
chr1	150925486	150926850	ATAC_chr1_150925486_150926850	OTX2	Embryonic Stem Cell
chr1	150925486	150926850	ATAC_chr1_150925486_150926850	PAF1	B Lymphocyte
chr1	150925486	150926850	ATAC_chr1_150925486_150926850	PAX5	B Lymphocyte, Lymphoblastoid
chr1	150925486	150926850	ATAC_chr1_150925486_150926850	PBX1	Pre-B Lymphocyte
chr1	150925486	150926850	ATAC_chr1_150925486_150926850	PBX2	Erythroblast
chr1	150925486	150926850	ATAC_chr1_150925486_150926850	PBX3	B Lymphocyte
chr1	150925486	150926850	ATAC_chr1_150925486_150926850	PCGF1	hESC
chr1	150925486	150926850	ATAC_chr1_150925486_150926850	PDX1	Embryonic Stem Cell
chr1	150925486	150926850	ATAC_chr1_150925486_150926850	PHF8	Erythroblast, Embryonic Stem Cell
chr1	150925486	150926850	ATAC_chr1_150925486_150926850	PKNOX1	Erythroblast
chr1	150925486	150926850	ATAC_chr1_150925486_150926850	PML	Erythroblast, B Lymphocyte
chr1	150925486	150926850	ATAC_chr1_150925486_150926850	POLR2A	Acute myeloid leukemia, Proerythroblast, Lymphoblastoid, Erythroblast, Stem cell, T Lymphocyte, Progenitor Cells, B Lymphocyte, Leukemia, B cell lymphoma, Plasma Cell, Embryonic Stem Cell, Myeloid Cell, Lymphocyte, Plasmacytoid dendritic cell, T Lymphoblast, Th2, Myeloblast, Th1, Macrophage, Monocyte, Leukemia Cell, Lymphoblast, hESC
chr1	150925486	150926850	ATAC_chr1_150925486_150926850	POLR2AphosphoS5	iPSC
chr1	150925486	150926850	ATAC_chr1_150925486_150926850	POLR2H	Erythroblast
chr1	150925486	150926850	ATAC_chr1_150925486_150926850	POLR3D	Macrophage
chr1	150925486	150926850	ATAC_chr1_150925486_150926850	POU2F2	B Lymphocyte, Lymphoblastoid, B cell lymphoma
chr1	150925486	150926850	ATAC_chr1_150925486_150926850	POU5F1	iPSC, Embryonic Stem Cell
chr1	150925486	150926850	ATAC_chr1_150925486_150926850	PRAME	Erythroblast
chr1	150925486	150926850	ATAC_chr1_150925486_150926850	PRDM1	Embryonic Stem Cell
chr1	150925486	150926850	ATAC_chr1_150925486_150926850	RAD21	Erythroblast, Embryonic Stem Cell
chr1	150925486	150926850	ATAC_chr1_150925486_150926850	RAD51	Erythroblast
chr1	150925486	150926850	ATAC_chr1_150925486_150926850	RBBP5	Erythroblast, Embryonic Stem Cell
chr1	150925486	150926850	ATAC_chr1_150925486_150926850	RBPJ	T Lymphocyte, B Lymphocyte, Lymphocyte
chr1	150925486	150926850	ATAC_chr1_150925486_150926850	RCOR1	Erythroblast, B Lymphocyte
chr1	150925486	150926850	ATAC_chr1_150925486_150926850	REL	Lymphoblastoid
chr1	150925486	150926850	ATAC_chr1_150925486_150926850	RELA	Erythroblast, Lymphoblastoid, Th1, B Lymphocyte, Monocyte
chr1	150925486	150926850	ATAC_chr1_150925486_150926850	RELB	Lymphoblastoid
chr1	150925486	150926850	ATAC_chr1_150925486_150926850	REPIN1	Myeloblast
chr1	150925486	150926850	ATAC_chr1_150925486_150926850	REST	Embryonic Stem Cell, T Lymphocyte, B Lymphocyte, Erythroblast
chr1	150925486	150926850	ATAC_chr1_150925486_150926850	RFX1	Erythroblast
chr1	150925486	150926850	ATAC_chr1_150925486_150926850	RFX5	Erythroblast, B Lymphocyte
chr1	150925486	150926850	ATAC_chr1_150925486_150926850	RNF2	Erythroblast
chr1	150925486	150926850	ATAC_chr1_150925486_150926850	RUNX1	Leukemic cells, Myeloid Cell, Myeloblast, T Lymphocyte, Leukemic Blast Cell, Stem cell, Pre-B Lymphocyte, Monocyte, Acute myeloid leukemia, Leukemia Cell, Megakaryocyte, AML cell, Erythroblast, Haematopoietic Progenitor Cell
chr1	150925486	150926850	ATAC_chr1_150925486_150926850	RUNX1T1	Myeloblast
chr1	150925486	150926850	ATAC_chr1_150925486_150926850	RUNX3	B Lymphocyte
chr1	150925486	150926850	ATAC_chr1_150925486_150926850	RXRA	Embryonic Stem Cell, B Lymphocyte
chr1	150925486	150926850	ATAC_chr1_150925486_150926850	RYBP	hESC
chr1	150925486	150926850	ATAC_chr1_150925486_150926850	SAP30	Embryonic Stem Cell, Erythroblast
chr1	150925486	150926850	ATAC_chr1_150925486_150926850	SETD1A	Erythroid Cell, Pre-B Lymphocyte
chr1	150925486	150926850	ATAC_chr1_150925486_150926850	SETDB1	Erythroblast
chr1	150925486	150926850	ATAC_chr1_150925486_150926850	SIN3A	B Lymphocyte, Embryonic Stem Cell, Erythroblast
chr1	150925486	150926850	ATAC_chr1_150925486_150926850	SIRT6	Erythroblast, Embryonic Stem Cell
chr1	150925486	150926850	ATAC_chr1_150925486_150926850	SIX5	B Lymphocyte, Erythroblast
chr1	150925486	150926850	ATAC_chr1_150925486_150926850	SMAD1	Haematopoietic Progenitor Cell, Erythroblast
chr1	150925486	150926850	ATAC_chr1_150925486_150926850	SMAD2/3	Embryonic Stem Cell
chr1	150925486	150926850	ATAC_chr1_150925486_150926850	SMAD3	Embryonic Stem Cell
chr1	150925486	150926850	ATAC_chr1_150925486_150926850	SMAD5	B Lymphocyte
chr1	150925486	150926850	ATAC_chr1_150925486_150926850	SMARCA4	Erythroblast, Embryonic Stem Cell, Haematopoietic Progenitor Cell, Hematopoietic Stem Cell, CD36 Cell
chr1	150925486	150926850	ATAC_chr1_150925486_150926850	SMARCA5	Erythroblast
chr1	150925486	150926850	ATAC_chr1_150925486_150926850	SMARCC1	Embryonic Stem Cell
chr1	150925486	150926850	ATAC_chr1_150925486_150926850	SMARCE1	Erythroblast
chr1	150925486	150926850	ATAC_chr1_150925486_150926850	SMC1A	Lymphoblastoid, B cell lymphoma
chr1	150925486	150926850	ATAC_chr1_150925486_150926850	SND1	Lymphocyte, B Lymphocyte
chr1	150925486	150926850	ATAC_chr1_150925486_150926850	SOX2	iPSC, hESC
chr1	150925486	150926850	ATAC_chr1_150925486_150926850	SP1	Embryonic Stem Cell, B Lymphocyte, Erythroblast
chr1	150925486	150926850	ATAC_chr1_150925486_150926850	SP4	Embryonic Stem Cell
chr1	150925486	150926850	ATAC_chr1_150925486_150926850	SPI1	Macrophage, B Lymphocyte, Lymphoblastoid, Monocyte, Erythroblast, Haematopoietic Progenitor Cell, Myeloblast, Hematopoietic stem and progenitor cell, Leukemia Cell
chr1	150925486	150926850	ATAC_chr1_150925486_150926850	SPIB	B Lymphocyte
chr1	150925486	150926850	ATAC_chr1_150925486_150926850	SREBF1	B Lymphocyte
chr1	150925486	150926850	ATAC_chr1_150925486_150926850	SREBF2	B Lymphocyte
chr1	150925486	150926850	ATAC_chr1_150925486_150926850	SRF	B Lymphocyte, Erythroblast, Embryonic Stem Cell
chr1	150925486	150926850	ATAC_chr1_150925486_150926850	SSU72	Embryonic Stem Cell
chr1	150925486	150926850	ATAC_chr1_150925486_150926850	STAG1	Lymphoblastoid, B Lymphocyte, Hematopoietic stem and progenitor cell
chr1	150925486	150926850	ATAC_chr1_150925486_150926850	STAT1	Monocyte, Erythroblast, B Lymphocyte
chr1	150925486	150926850	ATAC_chr1_150925486_150926850	STAT2	Erythroblast, B Lymphocyte
chr1	150925486	150926850	ATAC_chr1_150925486_150926850	STAT3	B Lymphocyte, B cell lymphoma
chr1	150925486	150926850	ATAC_chr1_150925486_150926850	STAT5A	B Lymphocyte, Erythroblast
chr1	150925486	150926850	ATAC_chr1_150925486_150926850	STAT5B	T Lymphocyte, Lymphocyte
chr1	150925486	150926850	ATAC_chr1_150925486_150926850	SUMO2	Erythroblast
chr1	150925486	150926850	ATAC_chr1_150925486_150926850	SUPT5H	Leukemia, B Lymphocyte, Erythroblast
chr1	150925486	150926850	ATAC_chr1_150925486_150926850	SUZ12	Proerythroblast
chr1	150925486	150926850	ATAC_chr1_150925486_150926850	T	Th1, Monocyte, T Lymphocyte
chr1	150925486	150926850	ATAC_chr1_150925486_150926850	TAF1	Embryonic Stem Cell, Erythroblast, Lymphoblastoid, B Lymphocyte
chr1	150925486	150926850	ATAC_chr1_150925486_150926850	TAF7	Erythroblast, Embryonic Stem Cell
chr1	150925486	150926850	ATAC_chr1_150925486_150926850	TAFII	Embryonic Stem Cell
chr1	150925486	150926850	ATAC_chr1_150925486_150926850	TAL1	Acute myeloid leukemia, T Lymphoblast, Erythroblast, Proerythroblast
chr1	150925486	150926850	ATAC_chr1_150925486_150926850	TARDBP	B Lymphocyte, Erythroblast
chr1	150925486	150926850	ATAC_chr1_150925486_150926850	TBL1XR1	Erythroblast, B Lymphocyte
chr1	150925486	150926850	ATAC_chr1_150925486_150926850	TBP	B Lymphocyte, Embryonic Stem Cell, Leukemia Cell, Erythroblast
chr1	150925486	150926850	ATAC_chr1_150925486_150926850	TBX21	B Lymphocyte, Th1
chr1	150925486	150926850	ATAC_chr1_150925486_150926850	TCF12	B Lymphocyte, Myeloblast, Leukemia Cell, Embryonic Stem Cell, T cell leukemia
chr1	150925486	150926850	ATAC_chr1_150925486_150926850	TCF4	Plasmacytoid dendritic cell
chr1	150925486	150926850	ATAC_chr1_150925486_150926850	TCF7	Erythroblast
chr1	150925486	150926850	ATAC_chr1_150925486_150926850	TCF7L1	Myeloblast, B Lymphocyte, Pre-B Lymphocyte, Embryonic Stem Cell, T cell leukemia
chr1	150925486	150926850	ATAC_chr1_150925486_150926850	TCF7L2	Haematopoietic Progenitor Cell
chr1	150925486	150926850	ATAC_chr1_150925486_150926850	TEAD4	Erythroblast
chr1	150925486	150926850	ATAC_chr1_150925486_150926850	TET1	hESC
chr1	150925486	150926850	ATAC_chr1_150925486_150926850	TET2	T Lymphocyte
chr1	150925486	150926850	ATAC_chr1_150925486_150926850	TFAP2A	Embryonic Stem Cell
chr1	150925486	150926850	ATAC_chr1_150925486_150926850	TFDP1	B Lymphocyte, Erythroblast
chr1	150925486	150926850	ATAC_chr1_150925486_150926850	THAP1	Erythroblast
chr1	150925486	150926850	ATAC_chr1_150925486_150926850	TP53	Lymphoblastoid
chr1	150925486	150926850	ATAC_chr1_150925486_150926850	TRIM22	B Lymphocyte
chr1	150925486	150926850	ATAC_chr1_150925486_150926850	TRIM24	Erythroblast
chr1	150925486	150926850	ATAC_chr1_150925486_150926850	TRIM25	Erythroblast
chr1	150925486	150926850	ATAC_chr1_150925486_150926850	TRIM28	Embryonic Stem Cell, Hematopoietic Stem Cell, Erythroblast, B Lymphocyte
chr1	150925486	150926850	ATAC_chr1_150925486_150926850	UBTF	Erythroblast
chr1	150925486	150926850	ATAC_chr1_150925486_150926850	USF1	Erythroblast, Embryonic Stem Cell, B Lymphocyte, Erythroid Cell
chr1	150925486	150926850	ATAC_chr1_150925486_150926850	USF2	Stem cell, B Lymphocyte, Embryonic Stem Cell, Erythroblast, Erythroid Cell
chr1	150925486	150926850	ATAC_chr1_150925486_150926850	VDR	Lymphocyte
chr1	150925486	150926850	ATAC_chr1_150925486_150926850	WRNIP1	B Lymphocyte
chr1	150925486	150926850	ATAC_chr1_150925486_150926850	YBX1	B Lymphocyte
chr1	150925486	150926850	ATAC_chr1_150925486_150926850	YY1	Erythroblast, Embryonic Stem Cell, B Lymphocyte, T Lymphocyte, Lymphoblastoid
chr1	150925486	150926850	ATAC_chr1_150925486_150926850	ZBED1	B Lymphocyte
chr1	150925486	150926850	ATAC_chr1_150925486_150926850	ZBTB11	Erythroblast
chr1	150925486	150926850	ATAC_chr1_150925486_150926850	ZBTB2	B Lymphocyte
chr1	150925486	150926850	ATAC_chr1_150925486_150926850	ZBTB33	B Lymphocyte, Erythroblast
chr1	150925486	150926850	ATAC_chr1_150925486_150926850	ZBTB40	B Lymphocyte, Erythroblast
chr1	150925486	150926850	ATAC_chr1_150925486_150926850	ZBTB7A	Erythroblast
chr1	150925486	150926850	ATAC_chr1_150925486_150926850	ZC3H8	Erythroblast
chr1	150925486	150926850	ATAC_chr1_150925486_150926850	ZEB1	B Lymphocyte
chr1	150925486	150926850	ATAC_chr1_150925486_150926850	ZEB2	Erythroblast
chr1	150925486	150926850	ATAC_chr1_150925486_150926850	ZFX	Erythroblast
chr1	150925486	150926850	ATAC_chr1_150925486_150926850	ZKSCAN1	Erythroblast
chr1	150925486	150926850	ATAC_chr1_150925486_150926850	ZKSCAN8	Erythroblast
chr1	150925486	150926850	ATAC_chr1_150925486_150926850	ZMIZ1	Erythroblast
chr1	150925486	150926850	ATAC_chr1_150925486_150926850	ZNF143	B Lymphocyte, Embryonic Stem Cell, Erythroblast
chr1	150925486	150926850	ATAC_chr1_150925486_150926850	ZNF175	Erythroblast
chr1	150925486	150926850	ATAC_chr1_150925486_150926850	ZNF18	Erythroblast
chr1	150925486	150926850	ATAC_chr1_150925486_150926850	ZNF197	Erythroblast
chr1	150925486	150926850	ATAC_chr1_150925486_150926850	ZNF24	Erythroblast
chr1	150925486	150926850	ATAC_chr1_150925486_150926850	ZNF263	Erythroblast
chr1	150925486	150926850	ATAC_chr1_150925486_150926850	ZNF384	Erythroblast
chr1	150925486	150926850	ATAC_chr1_150925486_150926850	ZNF584	Erythroblast
chr1	150925486	150926850	ATAC_chr1_150925486_150926850	ZNF589	Erythroblast
chr1	150925486	150926850	ATAC_chr1_150925486_150926850	ZNF597	B Lymphocyte
chr1	150925486	150926850	ATAC_chr1_150925486_150926850	ZNF639	Erythroblast
chr1	150925486	150926850	ATAC_chr1_150925486_150926850	ZNF644	Erythroblast
chr1	150925486	150926850	ATAC_chr1_150925486_150926850	ZNF740	Erythroblast
chr1	150925486	150926850	ATAC_chr1_150925486_150926850	ZNF75A	Erythroblast
chr1	150925486	150926850	ATAC_chr1_150925486_150926850	ZNF766	Erythroblast
chr1	150925486	150926850	ATAC_chr1_150925486_150926850	ZNF83	Erythroblast
chr1	150925486	150926850	ATAC_chr1_150925486_150926850	ZSCAN29	Erythroblast
chr1	154386598	154387307	ATAC_chr1_154386598_154387307	ARNT	Erythroblast
chr1	154386598	154387307	ATAC_chr1_154386598_154387307	ATF1	Erythroblast
chr1	154386598	154387307	ATAC_chr1_154386598_154387307	ATF3	Erythroblast
chr1	154386598	154387307	ATAC_chr1_154386598_154387307	BACH1	Erythroblast
chr1	154386598	154387307	ATAC_chr1_154386598_154387307	BATF	B Lymphocyte
chr1	154386598	154387307	ATAC_chr1_154386598_154387307	BCL3	B Lymphocyte
chr1	154386598	154387307	ATAC_chr1_154386598_154387307	BCL6	T Lymphocyte, B Lymphocyte, B cell lymphoma
chr1	154386598	154387307	ATAC_chr1_154386598_154387307	BCLAF1	B Lymphocyte
chr1	154386598	154387307	ATAC_chr1_154386598_154387307	BHLHE40	Erythroblast, B Lymphocyte
chr1	154386598	154387307	ATAC_chr1_154386598_154387307	BRD4	Lymphoblastoid, Erythroblast, T Lymphocyte, Th1
chr1	154386598	154387307	ATAC_chr1_154386598_154387307	CBX1	Erythroblast
chr1	154386598	154387307	ATAC_chr1_154386598_154387307	CBX3	Erythroblast
chr1	154386598	154387307	ATAC_chr1_154386598_154387307	CCNT2	Erythroblast
chr1	154386598	154387307	ATAC_chr1_154386598_154387307	CD74	B Lymphocyte
chr1	154386598	154387307	ATAC_chr1_154386598_154387307	CEBPA	Erythroblast
chr1	154386598	154387307	ATAC_chr1_154386598_154387307	CEBPB	Erythroblast
chr1	154386598	154387307	ATAC_chr1_154386598_154387307	CEBPD	Erythroblast
chr1	154386598	154387307	ATAC_chr1_154386598_154387307	CHAMP1	Erythroblast
chr1	154386598	154387307	ATAC_chr1_154386598_154387307	CHD2	B Lymphocyte
chr1	154386598	154387307	ATAC_chr1_154386598_154387307	CREB1	Erythroblast
chr1	154386598	154387307	ATAC_chr1_154386598_154387307	CREB3	Erythroblast
chr1	154386598	154387307	ATAC_chr1_154386598_154387307	CSDE1	Erythroblast
chr1	154386598	154387307	ATAC_chr1_154386598_154387307	CTCF	Lymphoblastoid, B cell lymphoma
chr1	154386598	154387307	ATAC_chr1_154386598_154387307	CUX1	Erythroblast
chr1	154386598	154387307	ATAC_chr1_154386598_154387307	DDX20	Erythroblast
chr1	154386598	154387307	ATAC_chr1_154386598_154387307	DPF2	Erythroblast
chr1	154386598	154387307	ATAC_chr1_154386598_154387307	E2F5	Erythroblast
chr1	154386598	154387307	ATAC_chr1_154386598_154387307	E2F6	Erythroblast
chr1	154386598	154387307	ATAC_chr1_154386598_154387307	EBF1	B Lymphocyte
chr1	154386598	154387307	ATAC_chr1_154386598_154387307	EGR1	Erythroblast, B Lymphocyte
chr1	154386598	154387307	ATAC_chr1_154386598_154387307	ELF1	Erythroblast, B Lymphocyte
chr1	154386598	154387307	ATAC_chr1_154386598_154387307	ELK1	Erythroblast
chr1	154386598	154387307	ATAC_chr1_154386598_154387307	EP300	B Lymphocyte, Erythroblast
chr1	154386598	154387307	ATAC_chr1_154386598_154387307	EPC1	Lymphoblast
chr1	154386598	154387307	ATAC_chr1_154386598_154387307	ETS1	T Lymphocyte, Erythroblast
chr1	154386598	154387307	ATAC_chr1_154386598_154387307	ETV1	Erythroblast
chr1	154386598	154387307	ATAC_chr1_154386598_154387307	FAIRE	Erythroblast
chr1	154386598	154387307	ATAC_chr1_154386598_154387307	FAM208A	Leukemia
chr1	154386598	154387307	ATAC_chr1_154386598_154387307	FLI1	Myeloblast
chr1	154386598	154387307	ATAC_chr1_154386598_154387307	FOS	Erythroblast
chr1	154386598	154387307	ATAC_chr1_154386598_154387307	FOSL1	Erythroblast
chr1	154386598	154387307	ATAC_chr1_154386598_154387307	FOXA1	Embryonic Stem Cell
chr1	154386598	154387307	ATAC_chr1_154386598_154387307	FOXA2	Embryonic Stem Cell
chr1	154386598	154387307	ATAC_chr1_154386598_154387307	FOXJ2	Erythroblast
chr1	154386598	154387307	ATAC_chr1_154386598_154387307	FOXK2	Erythroblast
chr1	154386598	154387307	ATAC_chr1_154386598_154387307	GABPA	Erythroblast, T Lymphocyte
chr1	154386598	154387307	ATAC_chr1_154386598_154387307	GATA1	Erythroblast, Proerythroblast, Hematopoietic stem and progenitor cell
chr1	154386598	154387307	ATAC_chr1_154386598_154387307	GATA2	Erythroblast
chr1	154386598	154387307	ATAC_chr1_154386598_154387307	GTF2B	Erythroblast
chr1	154386598	154387307	ATAC_chr1_154386598_154387307	GTF2E2	Erythroblast
chr1	154386598	154387307	ATAC_chr1_154386598_154387307	GTF2F1	Erythroblast
chr1	154386598	154387307	ATAC_chr1_154386598_154387307	H2AZ	Erythroblast, Macrophage, B Lymphocyte, Monocyte, CD14 cell
chr1	154386598	154387307	ATAC_chr1_154386598_154387307	HCFC1	Erythroblast
chr1	154386598	154387307	ATAC_chr1_154386598_154387307	HDAC1	Erythroblast, B cell precursor
chr1	154386598	154387307	ATAC_chr1_154386598_154387307	HDAC2	Erythroblast
chr1	154386598	154387307	ATAC_chr1_154386598_154387307	HDAC6	T Lymphocyte
chr1	154386598	154387307	ATAC_chr1_154386598_154387307	HDGF	Erythroblast
chr1	154386598	154387307	ATAC_chr1_154386598_154387307	HEY1	Erythroblast
chr1	154386598	154387307	ATAC_chr1_154386598_154387307	HMBOX1	Erythroblast
chr1	154386598	154387307	ATAC_chr1_154386598_154387307	ID3	Erythroblast
chr1	154386598	154387307	ATAC_chr1_154386598_154387307	IKZF1	B Lymphocyte
chr1	154386598	154387307	ATAC_chr1_154386598_154387307	IRF1	Erythroblast
chr1	154386598	154387307	ATAC_chr1_154386598_154387307	JUN	Erythroblast
chr1	154386598	154387307	ATAC_chr1_154386598_154387307	JUND	Erythroblast
chr1	154386598	154387307	ATAC_chr1_154386598_154387307	KDM1A	Erythroblast
chr1	154386598	154387307	ATAC_chr1_154386598_154387307	KDM5B	Erythroblast
chr1	154386598	154387307	ATAC_chr1_154386598_154387307	KMT2A	Monocyte, Leukemia Cell
chr1	154386598	154387307	ATAC_chr1_154386598_154387307	L3MBTL2	Erythroblast
chr1	154386598	154387307	ATAC_chr1_154386598_154387307	LEF1	Erythroblast
chr1	154386598	154387307	ATAC_chr1_154386598_154387307	MAF	Th2, Th1
chr1	154386598	154387307	ATAC_chr1_154386598_154387307	MAX	Erythroblast, B Lymphocyte
chr1	154386598	154387307	ATAC_chr1_154386598_154387307	MAZ	Erythroblast, B Lymphocyte
chr1	154386598	154387307	ATAC_chr1_154386598_154387307	MBD2	Erythroblast
chr1	154386598	154387307	ATAC_chr1_154386598_154387307	MBTD1	Lymphoblast
chr1	154386598	154387307	ATAC_chr1_154386598_154387307	MEF2A	B Lymphocyte
chr1	154386598	154387307	ATAC_chr1_154386598_154387307	MEF2D	Erythroblast
chr1	154386598	154387307	ATAC_chr1_154386598_154387307	MLLT1	Erythroblast
chr1	154386598	154387307	ATAC_chr1_154386598_154387307	MTA2	Erythroblast, B Lymphocyte
chr1	154386598	154387307	ATAC_chr1_154386598_154387307	MXI1	B Lymphocyte, Erythroblast
chr1	154386598	154387307	ATAC_chr1_154386598_154387307	MYB	T Lymphocyte, Th1
chr1	154386598	154387307	ATAC_chr1_154386598_154387307	MYC	Erythroblast
chr1	154386598	154387307	ATAC_chr1_154386598_154387307	MYNN	Erythroblast
chr1	154386598	154387307	ATAC_chr1_154386598_154387307	NBN	Erythroblast
chr1	154386598	154387307	ATAC_chr1_154386598_154387307	NCOA1	Erythroblast
chr1	154386598	154387307	ATAC_chr1_154386598_154387307	NFYA	Erythroblast
chr1	154386598	154387307	ATAC_chr1_154386598_154387307	NFYB	B Lymphocyte, Erythroblast
chr1	154386598	154387307	ATAC_chr1_154386598_154387307	NIPBL	Lymphoblastoid
chr1	154386598	154387307	ATAC_chr1_154386598_154387307	NOTCH1	T Lymphocyte
chr1	154386598	154387307	ATAC_chr1_154386598_154387307	NR2C2	Erythroblast
chr1	154386598	154387307	ATAC_chr1_154386598_154387307	NR2F2	Erythroblast
chr1	154386598	154387307	ATAC_chr1_154386598_154387307	NR2F6	Erythroblast
chr1	154386598	154387307	ATAC_chr1_154386598_154387307	NR3C1	Macrophage
chr1	154386598	154387307	ATAC_chr1_154386598_154387307	NR4A1	Erythroblast
chr1	154386598	154387307	ATAC_chr1_154386598_154387307	NRF1	Erythroblast
chr1	154386598	154387307	ATAC_chr1_154386598_154387307	PAX5	B Lymphocyte, Lymphoblastoid
chr1	154386598	154387307	ATAC_chr1_154386598_154387307	PHF8	Erythroblast
chr1	154386598	154387307	ATAC_chr1_154386598_154387307	PKNOX1	Erythroblast
chr1	154386598	154387307	ATAC_chr1_154386598_154387307	PML	Erythroblast
chr1	154386598	154387307	ATAC_chr1_154386598_154387307	POLR2A	B Lymphocyte, Th2, Lymphoblastoid, Lymphocyte, Erythroblast, T Lymphocyte, Leukemia, Th1, B cell lymphoma, Proerythroblast
chr1	154386598	154387307	ATAC_chr1_154386598_154387307	POLR2H	Erythroblast
chr1	154386598	154387307	ATAC_chr1_154386598_154387307	POU2F2	Lymphoblastoid, B Lymphocyte
chr1	154386598	154387307	ATAC_chr1_154386598_154387307	PRAME	Erythroblast
chr1	154386598	154387307	ATAC_chr1_154386598_154387307	PYGO2	Erythroblast
chr1	154386598	154387307	ATAC_chr1_154386598_154387307	RAD21	Erythroblast
chr1	154386598	154387307	ATAC_chr1_154386598_154387307	RAD51	Erythroblast
chr1	154386598	154387307	ATAC_chr1_154386598_154387307	RBBP5	Erythroblast
chr1	154386598	154387307	ATAC_chr1_154386598_154387307	RBPJ	Lymphoblastoid, Lymphocyte
chr1	154386598	154387307	ATAC_chr1_154386598_154387307	RCOR1	Erythroblast
chr1	154386598	154387307	ATAC_chr1_154386598_154387307	REL	Lymphoblastoid
chr1	154386598	154387307	ATAC_chr1_154386598_154387307	RELA	Lymphoblastoid, Erythroblast, B Lymphocyte, Th1
chr1	154386598	154387307	ATAC_chr1_154386598_154387307	RELB	Lymphoblastoid
chr1	154386598	154387307	ATAC_chr1_154386598_154387307	REST	Erythroblast
chr1	154386598	154387307	ATAC_chr1_154386598_154387307	RFX1	Erythroblast
chr1	154386598	154387307	ATAC_chr1_154386598_154387307	RNF2	Erythroblast
chr1	154386598	154387307	ATAC_chr1_154386598_154387307	RUNX1	T Lymphocyte
chr1	154386598	154387307	ATAC_chr1_154386598_154387307	RUNX3	B Lymphocyte
chr1	154386598	154387307	ATAC_chr1_154386598_154387307	SETDB1	Erythroblast
chr1	154386598	154387307	ATAC_chr1_154386598_154387307	SIN3A	Erythroblast, B Lymphocyte
chr1	154386598	154387307	ATAC_chr1_154386598_154387307	SMARCA4	Erythroblast, CD36 Cell
chr1	154386598	154387307	ATAC_chr1_154386598_154387307	SMARCE1	Erythroblast
chr1	154386598	154387307	ATAC_chr1_154386598_154387307	SMC1A	Lymphoblastoid
chr1	154386598	154387307	ATAC_chr1_154386598_154387307	SND1	Lymphocyte
chr1	154386598	154387307	ATAC_chr1_154386598_154387307	SP1	B Lymphocyte
chr1	154386598	154387307	ATAC_chr1_154386598_154387307	SPI1	B Lymphocyte, Macrophage, Monocyte, Erythroblast, Lymphoblastoid, Leukemia Cell
chr1	154386598	154387307	ATAC_chr1_154386598_154387307	SPIB	B Lymphocyte
chr1	154386598	154387307	ATAC_chr1_154386598_154387307	SRF	Erythroblast
chr1	154386598	154387307	ATAC_chr1_154386598_154387307	STAG1	Lymphoblastoid
chr1	154386598	154387307	ATAC_chr1_154386598_154387307	STAT1	Monocyte, Erythroblast
chr1	154386598	154387307	ATAC_chr1_154386598_154387307	STAT2	Erythroblast
chr1	154386598	154387307	ATAC_chr1_154386598_154387307	STAT3	B Lymphocyte
chr1	154386598	154387307	ATAC_chr1_154386598_154387307	STAT4	Lymphocyte
chr1	154386598	154387307	ATAC_chr1_154386598_154387307	STAT5	T Lymphocyte
chr1	154386598	154387307	ATAC_chr1_154386598_154387307	STAT5A	Erythroblast
chr1	154386598	154387307	ATAC_chr1_154386598_154387307	STAT5B	T Lymphocyte, Lymphocyte
chr1	154386598	154387307	ATAC_chr1_154386598_154387307	SUMO2	Erythroblast
chr1	154386598	154387307	ATAC_chr1_154386598_154387307	SUPT5H	Erythroblast
chr1	154386598	154387307	ATAC_chr1_154386598_154387307	T	Th1, Monocyte
chr1	154386598	154387307	ATAC_chr1_154386598_154387307	TAF1	Erythroblast, Lymphoblastoid
chr1	154386598	154387307	ATAC_chr1_154386598_154387307	TAF7	Erythroblast
chr1	154386598	154387307	ATAC_chr1_154386598_154387307	TARDBP	Erythroblast, B Lymphocyte
chr1	154386598	154387307	ATAC_chr1_154386598_154387307	TBL1XR1	Erythroblast, B Lymphocyte
chr1	154386598	154387307	ATAC_chr1_154386598_154387307	TBP	B Lymphocyte, Erythroblast
chr1	154386598	154387307	ATAC_chr1_154386598_154387307	TBX21	B Lymphocyte
chr1	154386598	154387307	ATAC_chr1_154386598_154387307	TCF12	B Lymphocyte
chr1	154386598	154387307	ATAC_chr1_154386598_154387307	TCF7L2	Erythroblast
chr1	154386598	154387307	ATAC_chr1_154386598_154387307	TEAD4	Erythroblast
chr1	154386598	154387307	ATAC_chr1_154386598_154387307	TFDP1	Erythroblast
chr1	154386598	154387307	ATAC_chr1_154386598_154387307	TRIM24	Erythroblast
chr1	154386598	154387307	ATAC_chr1_154386598_154387307	TRIM28	Erythroblast
chr1	154386598	154387307	ATAC_chr1_154386598_154387307	UBTF	Erythroblast
chr1	154386598	154387307	ATAC_chr1_154386598_154387307	USF1	Erythroblast
chr1	154386598	154387307	ATAC_chr1_154386598_154387307	USF2	B Lymphocyte, Erythroblast
chr1	154386598	154387307	ATAC_chr1_154386598_154387307	YY1	Erythroblast, Lymphoblastoid
chr1	154386598	154387307	ATAC_chr1_154386598_154387307	ZBTB11	Erythroblast
chr1	154386598	154387307	ATAC_chr1_154386598_154387307	ZBTB40	B Lymphocyte, Erythroblast
chr1	154386598	154387307	ATAC_chr1_154386598_154387307	ZBTB7A	Erythroblast
chr1	154386598	154387307	ATAC_chr1_154386598_154387307	ZC3H8	Erythroblast
chr1	154386598	154387307	ATAC_chr1_154386598_154387307	ZEB2	Erythroblast
chr1	154386598	154387307	ATAC_chr1_154386598_154387307	ZFX	Erythroblast
chr1	154386598	154387307	ATAC_chr1_154386598_154387307	ZKSCAN8	Erythroblast
chr1	154386598	154387307	ATAC_chr1_154386598_154387307	ZMIZ1	Erythroblast
chr1	154386598	154387307	ATAC_chr1_154386598_154387307	ZNF143	Erythroblast, B Lymphocyte
chr1	154386598	154387307	ATAC_chr1_154386598_154387307	ZNF175	Erythroblast
chr1	154386598	154387307	ATAC_chr1_154386598_154387307	ZNF18	Erythroblast
chr1	154386598	154387307	ATAC_chr1_154386598_154387307	ZNF197	Erythroblast
chr1	154386598	154387307	ATAC_chr1_154386598_154387307	ZNF24	Erythroblast
chr1	154386598	154387307	ATAC_chr1_154386598_154387307	ZNF318	Erythroblast
chr1	154386598	154387307	ATAC_chr1_154386598_154387307	ZNF584	Erythroblast
chr1	154386598	154387307	ATAC_chr1_154386598_154387307	ZNF589	Erythroblast
chr1	154386598	154387307	ATAC_chr1_154386598_154387307	ZNF639	Erythroblast
chr1	154386598	154387307	ATAC_chr1_154386598_154387307	ZNF644	Erythroblast
chr1	154386598	154387307	ATAC_chr1_154386598_154387307	ZNF766	Erythroblast
chr1	154386598	154387307	ATAC_chr1_154386598_154387307	ZSCAN29	Erythroblast
chr1	154404554	154408832	ATAC_chr1_154404554_154408832	AFF1	B Lymphocyte
chr1	154404554	154408832	ATAC_chr1_154404554_154408832	AFF4	Th1
chr1	154404554	154408832	ATAC_chr1_154404554_154408832	ATF1	Erythroblast
chr1	154404554	154408832	ATAC_chr1_154404554_154408832	ATF2	B Lymphocyte
chr1	154404554	154408832	ATAC_chr1_154404554_154408832	ATF3	Erythroblast, Embryonic Stem Cell
chr1	154404554	154408832	ATAC_chr1_154404554_154408832	BACH1	Embryonic Stem Cell, Erythroblast
chr1	154404554	154408832	ATAC_chr1_154404554_154408832	BACH2	B Lymphocyte
chr1	154404554	154408832	ATAC_chr1_154404554_154408832	BATF	B Lymphocyte
chr1	154404554	154408832	ATAC_chr1_154404554_154408832	BATF3	B Lymphocyte
chr1	154404554	154408832	ATAC_chr1_154404554_154408832	BCL11A	B Lymphocyte
chr1	154404554	154408832	ATAC_chr1_154404554_154408832	BCL3	B Lymphocyte
chr1	154404554	154408832	ATAC_chr1_154404554_154408832	BCL6	T Lymphocyte, B cell lymphoma, B Lymphocyte, Haematopoietic Progenitor Cell, Pre-B Lymphocyte
chr1	154404554	154408832	ATAC_chr1_154404554_154408832	BCLAF1	B Lymphocyte
chr1	154404554	154408832	ATAC_chr1_154404554_154408832	BCOR	B cell lymphoma, B Lymphocyte, Erythroblast, hESC
chr1	154404554	154408832	ATAC_chr1_154404554_154408832	BHLHE40	Erythroblast, B Lymphocyte
chr1	154404554	154408832	ATAC_chr1_154404554_154408832	BPTF	Erythroid Cell
chr1	154404554	154408832	ATAC_chr1_154404554_154408832	BRD2	B Lymphocyte
chr1	154404554	154408832	ATAC_chr1_154404554_154408832	BRD3	B Lymphocyte
chr1	154404554	154408832	ATAC_chr1_154404554_154408832	BRD4	B Lymphocyte, Plasma Cell, Lymphoblastoid, T Lymphocyte, Myeloid Cell, T Lymphoblast, Leukemia Cell, Th1, Embryonic Stem Cell, B cell lymphoma
chr1	154404554	154408832	ATAC_chr1_154404554_154408832	C11orf30	Erythroblast
chr1	154404554	154408832	ATAC_chr1_154404554_154408832	CBFB	Myeloblast, Leukemia Cell, Hematopoietic Cell, B Lymphocyte
chr1	154404554	154408832	ATAC_chr1_154404554_154408832	CBX3	Erythroblast
chr1	154404554	154408832	ATAC_chr1_154404554_154408832	CBX5	B Lymphocyte
chr1	154404554	154408832	ATAC_chr1_154404554_154408832	CCND2	B Lymphocyte
chr1	154404554	154408832	ATAC_chr1_154404554_154408832	CCNT2	Erythroblast
chr1	154404554	154408832	ATAC_chr1_154404554_154408832	CD74	B Lymphocyte
chr1	154404554	154408832	ATAC_chr1_154404554_154408832	CDK7	B Lymphocyte
chr1	154404554	154408832	ATAC_chr1_154404554_154408832	CDK8	B Lymphocyte, Myeloid Cell, Macrophage
chr1	154404554	154408832	ATAC_chr1_154404554_154408832	CDK9	Plasma Cell, B Lymphocyte, Acute myeloid leukemia, T Lymphoblast, Th2, Th1
chr1	154404554	154408832	ATAC_chr1_154404554_154408832	CEBPA	B Lymphocyte, Myeloblast
chr1	154404554	154408832	ATAC_chr1_154404554_154408832	CEBPB	Erythroblast, Leukemia Cell, Embryonic Stem Cell, Monocyte, Acute myeloid leukemia, Macrophage, B Lymphocyte
chr1	154404554	154408832	ATAC_chr1_154404554_154408832	CEBPD	Erythroblast
chr1	154404554	154408832	ATAC_chr1_154404554_154408832	CEBPG	Erythroblast
chr1	154404554	154408832	ATAC_chr1_154404554_154408832	CHD1	Embryonic Stem Cell, Erythroblast, B Lymphocyte
chr1	154404554	154408832	ATAC_chr1_154404554_154408832	CHD2	Embryonic Stem Cell, B Lymphocyte
chr1	154404554	154408832	ATAC_chr1_154404554_154408832	CHD8	iPSC
chr1	154404554	154408832	ATAC_chr1_154404554_154408832	CREB1	B Lymphocyte, Embryonic Stem Cell, Erythroblast
chr1	154404554	154408832	ATAC_chr1_154404554_154408832	CREBBP	T Lymphocyte, B Lymphocyte
chr1	154404554	154408832	ATAC_chr1_154404554_154408832	CSDE1	Erythroblast
chr1	154404554	154408832	ATAC_chr1_154404554_154408832	CTBP2	Embryonic Stem Cell
chr1	154404554	154408832	ATAC_chr1_154404554_154408832	CTCF	Lymphoblastoid, B Lymphocyte, B Lymphoblast, Erythroblast, Embryonic Stem Cell, B cell lymphoma, Stromal Cell, Macrophage, T Lymphocyte, Erythroid Cell, Hematopoietic stem and progenitor cell, Erythroid Progenitor Cell, Monocyte, Leukemia, Proerythroblast, Hematopoietic Stem Cell
chr1	154404554	154408832	ATAC_chr1_154404554_154408832	CTCFL	Erythroblast
chr1	154404554	154408832	ATAC_chr1_154404554_154408832	CUX1	B Lymphocyte
chr1	154404554	154408832	ATAC_chr1_154404554_154408832	DNMT3B	Stem cell
chr1	154404554	154408832	ATAC_chr1_154404554_154408832	DPF2	Erythroblast
chr1	154404554	154408832	ATAC_chr1_154404554_154408832	DRAP1	B Lymphocyte
chr1	154404554	154408832	ATAC_chr1_154404554_154408832	E2F1	Multiple myeloma cell
chr1	154404554	154408832	ATAC_chr1_154404554_154408832	E2F5	Erythroblast
chr1	154404554	154408832	ATAC_chr1_154404554_154408832	E2F6	Embryonic Stem Cell, Erythroblast
chr1	154404554	154408832	ATAC_chr1_154404554_154408832	EBF1	B Lymphocyte, Lymphoblastoid
chr1	154404554	154408832	ATAC_chr1_154404554_154408832	EBNA1BP2	B Lymphocyte
chr1	154404554	154408832	ATAC_chr1_154404554_154408832	EBNA3	B Lymphocyte
chr1	154404554	154408832	ATAC_chr1_154404554_154408832	EBNA3C	B Lymphocyte
chr1	154404554	154408832	ATAC_chr1_154404554_154408832	EED	B Lymphocyte, Proerythroblast
chr1	154404554	154408832	ATAC_chr1_154404554_154408832	EGR1	Erythroblast, B Lymphocyte, Embryonic Stem Cell
chr1	154404554	154408832	ATAC_chr1_154404554_154408832	ELF1	B Lymphocyte, Erythroblast, Leukemia Cell
chr1	154404554	154408832	ATAC_chr1_154404554_154408832	ELK1	B Lymphocyte
chr1	154404554	154408832	ATAC_chr1_154404554_154408832	EP300	B Lymphocyte, Stem cell, Leukemia Cell, Acute myeloid leukemia, Progenitor Cells, Myeloblast, Erythroid Cell, Embryonic Stem Cell, Erythroblast
chr1	154404554	154408832	ATAC_chr1_154404554_154408832	ERG	Myeloblast, Acute myeloid leukemia, Leukemia Cell, Hematopoietic Cell, Erythroblast
chr1	154404554	154408832	ATAC_chr1_154404554_154408832	ESR1	Embryonic Stem Cell
chr1	154404554	154408832	ATAC_chr1_154404554_154408832	ETS1	T Lymphocyte, B Lymphocyte, Erythroblast, iPSC
chr1	154404554	154408832	ATAC_chr1_154404554_154408832	ETV1	Erythroblast
chr1	154404554	154408832	ATAC_chr1_154404554_154408832	ETV6	B Lymphocyte
chr1	154404554	154408832	ATAC_chr1_154404554_154408832	EZH1	Hematopoietic Cell
chr1	154404554	154408832	ATAC_chr1_154404554_154408832	EZH2	T Lymphocyte, Multiple myeloma cell, B Lymphocyte, Multiple myeloma, iPSC, Embryonic Stem Cell, Proerythroblast
chr1	154404554	154408832	ATAC_chr1_154404554_154408832	FAIRE	Macrophage
chr1	154404554	154408832	ATAC_chr1_154404554_154408832	FGFR1	iPSC
chr1	154404554	154408832	ATAC_chr1_154404554_154408832	FLI1	Myeloblast, Acute myeloid leukemia, Haematopoietic Progenitor Cell, Leukemia Cell
chr1	154404554	154408832	ATAC_chr1_154404554_154408832	FOS	Erythroblast
chr1	154404554	154408832	ATAC_chr1_154404554_154408832	FOSL1	Erythroblast
chr1	154404554	154408832	ATAC_chr1_154404554_154408832	FOSL2	Stromal Cell
chr1	154404554	154408832	ATAC_chr1_154404554_154408832	FOXA1	Embryonic Stem Cell
chr1	154404554	154408832	ATAC_chr1_154404554_154408832	FOXA2	Embryonic Stem Cell
chr1	154404554	154408832	ATAC_chr1_154404554_154408832	FOXJ2	Erythroblast
chr1	154404554	154408832	ATAC_chr1_154404554_154408832	FOXM1	B Lymphocyte
chr1	154404554	154408832	ATAC_chr1_154404554_154408832	FOXO1	Stromal Cell, B Lymphocyte
chr1	154404554	154408832	ATAC_chr1_154404554_154408832	FOXP1	Embryonic Stem Cell, B Lymphocyte
chr1	154404554	154408832	ATAC_chr1_154404554_154408832	GABPA	Erythroblast, Embryonic Stem Cell, B Lymphocyte
chr1	154404554	154408832	ATAC_chr1_154404554_154408832	GATA1	Proerythroblast, Hematopoietic stem and progenitor cell, Erythroid Cell, Erythroblast
chr1	154404554	154408832	ATAC_chr1_154404554_154408832	GATA2	Erythroblast, Haematopoietic Progenitor Cell, Leukemia Cell
chr1	154404554	154408832	ATAC_chr1_154404554_154408832	GLI2	Leukemia Cell
chr1	154404554	154408832	ATAC_chr1_154404554_154408832	GTF2E2	Erythroblast
chr1	154404554	154408832	ATAC_chr1_154404554_154408832	H2AZ	Macrophage, T Lymphocyte, B Lymphocyte, CD14 cell, Monocyte, Embryonic Stem Cell, Erythroblast, Proerythroblast
chr1	154404554	154408832	ATAC_chr1_154404554_154408832	HCFC1	Erythroblast
chr1	154404554	154408832	ATAC_chr1_154404554_154408832	HDAC1	B Lymphocyte, Erythroblast, Acute myeloid leukemia, Leukemia Cell, B cell precursor, Erythroid progenitor, T Lymphocyte
chr1	154404554	154408832	ATAC_chr1_154404554_154408832	HDAC2	Embryonic Stem Cell, Erythroblast, B Lymphocyte, Acute myeloid leukemia, Erythroid progenitor
chr1	154404554	154408832	ATAC_chr1_154404554_154408832	HDAC3	B Lymphocyte
chr1	154404554	154408832	ATAC_chr1_154404554_154408832	HDAC6	Erythroblast, T Lymphocyte
chr1	154404554	154408832	ATAC_chr1_154404554_154408832	HDGF	B Lymphocyte
[truncated: 24,310 more rows]

## Sheet: Table D
Table D. Colocalization results of meta-analyzed LCL eQTLs and IMD GWAS
PPA_3: posterior probability of colocalization
IMD	CHR	BP	ID	Celltype	Gene	Coloc_p	NSNP	start	end	max_abs_Z_IMD	max_abs_Z_RNA	logBF_1	logBF_2	logBF_3	logBF_4	pi_1	pi_2	pi_3	pi_4	PPA_1	PPA_2	PPA_3	PPA_4
CD_deLange_2017	chr1	7826364	rs697693	LCL_meta	ENSG00000236266	0.99468	527	7727324	7923392	5.38693	4.54678	7.15188	4.03346	12.2299	11.1801	0.00763004	0.00762371	0.530948	0.00796502	8.90857e-05	3.9367e-06	0.99468	0.00522294
CD_deLange_2017	chr1	8090578	rs72634258	LCL_meta	ENSG00000284747	0.995512	357	7991181	8189495	5.32877	13.1595	8.82501	77.4088	87.4149	86.2201	0.00762012	0.00761598	0.531321	0.0079111	1.05561e-36	6.43938e-07	0.995512	0.00448765
CD_deLange_2017	chr1	8090578	rs72634258	LCL_meta	PARK7	0.995318	357	7991181	8189495	5.32877	6.3135	8.82501	14.1966	24.1686	23.0141	0.00761958	0.00762118	0.531245	0.00792682	3.09715e-09	6.66641e-07	0.995318	0.00468127
CD_deLange_2017	chr1	154420198	rs35402075	LCL_meta	IL6R	0.99883	423	154320506	154520057	4.98616	14.3092	5.68871	93.9466	102.098	99.5888	0.00758748	0.0075825	0.533769	0.00766248	1.91492e-44	4.09052e-06	0.99883	0.001166
CD_deLange_2017	chr1	154420198	rs35402075	LCL_meta	IL6R-AS1	0.998893	423	154320506	154520057	4.98616	5.64189	5.68871	9.86165	18.0751	15.5112	0.00758372	0.00758172	0.53372	0.00765469	5.92571e-08	3.84513e-06	0.998893	0.00110315
CD_deLange_2017	chr1	155349877	rs12131079	LCL_meta	RUSC1-AS1	0.00503084	110	155250077	155446537	6.25287	8.95146	12.6289	33.1596	44.7007	45.7855	0.00762561	0.00762075	0.00794572	0.531106	5.69104e-17	4.6913e-08	0.00503084	0.994969
CD_deLange_2017	chr1	155780535	rs2948072	LCL_meta	DAP3	0.00760915	91	155682290	155879929	5.75	4.54962	11.3874	4.81865	15.5037	16.2016	0.00765268	0.00765381	0.00815477	0.529182	0.000116429	1.63435e-07	0.00760915	0.992274
CD_deLange_2017	chr1	155780535	rs2948072	LCL_meta	FDPS	0.992278	91	155682290	155879929	5.75	5.39636	11.3874	9.96341	22.0167	21.3322	0.00765393	0.0076512	0.529111	0.0081639	3.47331e-07	8.35894e-08	0.992278	0.00772157
CD_deLange_2017	chr1	155780535	rs2948072	LCL_meta	SCAMP3	0.987021	91	155682290	155879929	5.75	4.21541	11.3874	3.34416	14.9661	14.7206	0.0077306	0.00769755	0.525483	0.0085566	0.000405291	1.29648e-07	0.987021	0.0125732
CD_deLange_2017	chr1	155780535	rs2948072	LCL_meta	YY1AP1	0.996534	91	155682290	155879929	5.75	7.02376	11.3874	17.9149	30.7028	29.2597	0.00760927	0.00760725	0.532179	0.00783649	5.82411e-11	3.98061e-08	0.996534	0.00346609
CD_deLange_2017	chr1	155981711	rs1889532	LCL_meta	GON4L	0.995337	186	155882332	156080086	5.3956	4.22411	8.56382	2.55433	12.3342	11.1048	0.00764384	0.00761729	0.53129	0.00789929	0.000329995	8.07443e-07	0.995337	0.0043285
CD_deLange_2017	chr1	155981711	rs1889532	LCL_meta	RIT1	0.996396	186	155882332	156080086	5.3956	7.2372	8.56382	19.3445	29.2948	27.8899	0.00761326	0.00760501	0.532028	0.00784091	1.41484e-11	6.79576e-07	0.996396	0.00360357
CD_deLange_2017	chr1	160862065	rs114802258	LCL_meta	ITLN1	0.996748	457	160762994	160960100	5.84635	6.00117	9.31517	11.0864	21.8951	20.3902	0.00759964	0.00760743	0.532524	0.00782399	4.89393e-08	2.87973e-07	0.996748	0.00325174
CD_deLange_2017	chr2	24938367	rs4343432	LCL_meta	ADCY3	3.04859e-05	468	24839184	25037759	6.9321	16.0291	16.6506	119.184	129.692	135.835	0.00757541	0.00757316	0.00757958	0.53459	2.45702e-54	8.31742e-10	3.04859e-05	0.99997
CD_deLange_2017	chr2	25265950	rs7578575	LCL_meta	DNMT3A	0.996397	263	25166355	25365459	5.52273	4.83603	8.43469	4.30024	14.142	12.7223	0.00760787	0.00760889	0.532071	0.0078491	4.73239e-05	7.57827e-07	0.996397	0.00355411
CD_deLange_2017	chr2	43273665	rs6736400	LCL_meta	ENSG00000234936	0.991366	327	43174816	43373582	6.10427	7.59716	12.583	20.6161	33.7744	33.1925	0.00765671	0.00765378	0.528483	0.00823587	8.99437e-12	2.77015e-08	0.991366	0.00863427
CD_deLange_2017	chr2	206087841	rs13408358	LCL_meta	INO80D-AS2	0.993848	334	205987888	206187455	5.1236	4.40484	5.76648	4.92786	11.5943	10.6885	0.00764049	0.00763497	0.530281	0.00803068	4.21631e-05	1.82143e-05	0.993848	0.00608349
CD_deLange_2017	chr2	206087841	rs13408358	LCL_meta	NDUFS1	0.995575	334	205987888	206187455	5.1236	16.2884	5.76648	123.98	130.946	129.734	0.00762231	0.00761878	0.531483	0.007906	6.16726e-57	1.3472e-05	0.995575	0.00441134
CD_deLange_2017	chr2	230230963	rs7563433	LCL_meta	CAB39	0.996271	641	230131107	230330373	7.62814	6.98963	21.8223	16.8521	40.04	38.6688	0.00760779	0.00761434	0.531895	0.00784303	1.74574e-10	1.21283e-12	0.996271	0.00372859
CD_deLange_2017	chr2	230230963	rs7563433	LCL_meta	ENSG00000225963	0.996907	641	230131107	230330373	7.62814	8.87095	21.8223	31.3906	54.7586	53.2052	0.00760443	0.0076075	0.532408	0.0078076	7.07042e-17	1.01177e-12	0.996907	0.00309257
CD_deLange_2017	chr2	230230963	rs7563433	LCL_meta	SLC16A14	0.993699	641	230131107	230330373	7.62814	10.5565	21.8223	47.538	70.2285	69.3559	0.00763293	0.0076372	0.530163	0.0080459	1.35825e-23	2.0017e-12	0.993699	0.00630106
CD_deLange_2017	chr2	230230963	rs7563433	LCL_meta	SP100	0.994621	641	230131107	230330373	7.62814	8.93492	21.8223	31.7179	54.5583	53.5357	0.00762885	0.00762408	0.530818	0.00798184	8.67158e-17	1.71955e-12	0.994621	0.00537902
CD_deLange_2017	chr2	230230963	rs7563433	LCL_meta	SP110	0.984926	641	230131107	230330373	7.62814	17.8827	21.8223	150.546	172.453	172.366	0.00772035	0.00772104	0.523985	0.00875433	5.54002e-68	4.4401e-12	0.984926	0.015074
CD_deLange_2017	chr2	230230963	rs7563433	LCL_meta	SP140	0.00506505	641	230131107	230330373	7.62814	31.8814	21.8223	497.63	518.371	519.451	0.00762749	0.0076257	0.0079607	0.530999	1.09048e-218	4.76486e-12	0.00506505	0.994935
CD_deLange_2017	chr2	233277353	rs3816234	LCL_meta	ATG16L1	0.995678	471	233177938	233377207	16.6914	5.84579	130.874	10.1908	142.287	141.057	0.00761295	0.00761369	0.531628	0.0078955	1.57534e-07	6.10115e-60	0.995678	0.0043223
CD_deLange_2017	chr2	233478157	rs745155	LCL_meta	DGKD	0.999999	292	233378185	233577817	6.83696	20.5816	14.8007	201.925	221.97	212.532	0.00756962	0.00757645	0.534567	0.00757544	1.50876e-92	2.79211e-11	0.999999	1.1287e-06
CD_deLange_2017	chr3	48720340	rs61137521	LCL_meta	PRKAR2A-AS1	0.994488	156	48621034	48815206	5.34322	5.69556	9.62998	11.1584	21.7685	20.769	0.0076266	0.00762784	0.530815	0.00799245	7.64353e-08	3.52486e-07	0.994488	0.00551157
CD_deLange_2017	chr3	48720340	rs61137521	LCL_meta	SLC26A6	0.00155579	156	48621034	48815206	5.34322	10.1579	9.62998	45.3835	52.7874	55.0125	0.00759164	0.00758296	0.0076932	0.533494	2.77442e-22	9.33711e-07	0.00155579	0.998443
CD_deLange_2017	chr3	49660026	rs9836291	LCL_meta	APEH	0.998437	204	49560304	49756914	10.1294	8.61631	45.1404	31.5206	78.8405	76.6199	0.00758886	0.00758764	0.53353	0.00769333	3.28529e-17	3.9947e-23	0.998437	0.00156268
CD_deLange_2017	chr3	49660026	rs9836291	LCL_meta	PRKAR2A	0.997879	204	49560304	49756914	10.1294	6.12695	45.1404	13.1416	60.1712	58.2515	0.00759081	0.00759593	0.53314	0.00772683	4.21434e-09	5.34697e-23	0.997879	0.00212087
CD_deLange_2017	chr3	49876272	rs36022378	LCL_meta	MST1	0.00012328	224	49776393	49976036	7.39205	4.72701	20.5771	3.78948	19.6206	24.3666	0.00759419	0.00757806	0.00758614	0.534266	0.000321213	1.64089e-11	0.00012328	0.999556
CD_deLange_2017	chr3	49876272	rs36022378	LCL_meta	RNF123	0.996359	224	49776393	49976036	7.39205	5.09711	20.5771	7.99435	29.9523	28.5567	0.00760367	0.00761105	0.532033	0.00784765	1.20755e-06	4.14654e-12	0.996359	0.00363998
CD_deLange_2017	chr3	49876272	rs36022378	LCL_meta	UBA7	0.997413	224	49776393	49976036	7.39205	7.30046	20.5771	20.0563	42.3363	40.6106	0.00759328	0.00759042	0.532829	0.00776246	5.04484e-12	2.9955e-12	0.997413	0.00258726
CD_deLange_2017	chr3	50136751	rs7428430	LCL_meta	RBM6	0.0112037	219	50036944	50236023	5.3	27.3353	7.05268	364.312	371.012	371.358	0.00767659	0.00768334	0.0084409	0.526739	8.76352e-161	1.25515e-05	0.0112037	0.988784
CD_deLange_2017	chr3	53099133	rs2581828	LCL_meta	ENSG00000272305	0.987906	355	53004287	53199027	5.80864	11.1329	10.1321	55.2626	65.6674	65.3889	0.00768775	0.00769215	0.526202	0.00851062	1.09826e-26	4.37414e-07	0.987906	0.0120939
CD_deLange_2017	chr3	53099133	rs2581828	LCL_meta	RFT1	0.985141	355	53004287	53199027	5.80864	10.8911	10.1321	52.1012	62.3293	62.2292	0.00772043	0.00771544	0.524219	0.00873902	3.10929e-25	5.23972e-07	0.985141	0.0148585
CD_deLange_2017	chr3	53099133	rs2581828	LCL_meta	SFMBT1	0.990526	355	53004287	53199027	5.80864	10.4296	10.1321	46.6341	57.2568	56.7595	0.00766443	0.00766911	0.527969	0.00830314	4.91735e-23	3.50417e-07	0.990526	0.00947345
CD_deLange_2017	chr3	101269134	rs348869	LCL_meta	IMPG2	0.99837	375	101170308	101368743	5.04375	4.0841	6.56476	2.46682	11.278	9.01054	0.00759359	0.0075921	0.533561	0.00768673	0.000127537	2.11758e-06	0.99837	0.00148978
CD_deLange_2017	chr3	101269134	rs348869	LCL_meta	SENP7	0.996477	375	101170308	101368743	5.04375	15.8624	6.56476	117.252	125.228	123.8	0.00761304	0.00760334	0.532139	0.00783752	4.15988e-54	4.88885e-06	0.996477	0.00351779
CD_deLange_2017	chr5	10682118	rs7715399	LCL_meta	DAP	0.00236295	589	10582465	10781518	5.27711	21.4691	6.86199	220.426	225.472	227.287	0.00759523	0.00759944	0.00775379	0.53284	2.65192e-98	1.49035e-05	0.00236295	0.997622
CD_deLange_2017	chr5	40411189	rs6451494	LCL_meta	PTGER4	0.00132057	512	40311466	40510564	15.7636	11.1113	115.537	53.253	166.405	168.79	0.00758706	0.00758451	0.00766395	0.533743	1.0586e-25	9.43937e-53	0.00132057	0.998679
CD_deLange_2017	chr5	142146492	rs181826	LCL_meta	NDFIP1	0.997097	541	142046614	142246069	6.95808	14.7612	18.4904	101.008	121.1	119.486	0.00760088	0.00760358	0.532472	0.00779368	3.89322e-47	2.67686e-11	0.997097	0.00290287
CD_deLange_2017	chr6	44277504	rs1044690	LCL_meta	AARS2	0.999257	366	44177569	44374243	4.93814	7.17782	3.86373	17.5389	24.3313	21.3532	0.00758585	0.00758186	0.534062	0.00763419	1.83286e-11	1.5921e-05	0.999257	0.000726921
CD_deLange_2017	chr6	167019278	rs35171809	LCL_meta	CCR6	0.993554	521	166919663	167119267	9.84906	4.18155	40.8039	4.80659	46.4659	45.6066	0.00764747	0.00763108	0.530023	0.00805848	4.98269e-05	1.15633e-20	0.993554	0.00639667
CD_deLange_2017	chr6	167019278	rs35171809	LCL_meta	ENSG00000227598	0.00270896	521	166919663	167119267	9.84906	10.7876	40.8039	52.0666	91.1894	92.8701	0.0075882	0.00760031	0.00776983	0.53274	3.47045e-25	2.70635e-20	0.00270896	0.997291
CD_deLange_2017	chr6	167019278	rs35171809	LCL_meta	ENSG00000285730	0.003452	521	166919663	167119267	9.84906	8.18153	40.8039	28.0761	67.4334	68.8796	0.00760331	0.0076031	0.00783002	0.532239	9.12627e-15	2.708e-20	0.003452	0.996548
CD_deLange_2017	chr6	167019278	rs35171809	LCL_meta	RNASET2	0.000420073	521	166919663	167119267	9.84906	10.4847	40.8039	46.683	83.9646	87.4869	0.00757942	0.00757427	0.00760347	0.534307	7.54219e-23	2.69444e-20	0.000420073	0.99958
CD_deLange_2017	chr7	74878823	rs2529275	LCL_meta	NCF1	0.999548	25	74782019	74954591	5.208	4.53591	8.21845	4.64414	15.5078	12.0344	0.00758169	0.00757998	0.534246	0.00761171	9.68515e-06	2.7146e-07	0.999548	0.000441643
CD_deLange_2017	chr7	74878823	rs2529275	LCL_meta	SPDYE12	0.983896	25	74782019	74954591	5.208	7.74441	8.21845	23.7483	31.9453	31.913	0.00773343	0.00772556	0.52333	0.00884476	7.21305e-13	4.0012e-06	0.983896	0.0161001
CD_deLange_2017	chr8	89787733	rs36032938	LCL_meta	RIPK2	0.995263	386	89687740	89886531	5.22896	6.0425	6.71937	11.4277	19.2849	18.1402	0.00762199	0.00761543	0.531268	0.0079337	4.98354e-08	5.52038e-06	0.995263	0.0047312
CD_deLange_2017	chr9	4984530	rs1887428	LCL_meta	JAK2	0.999987	423	4884546	5084215	9.82249	4.78425	38.9179	3.16336	47.9047	40.7725	0.0075764	0.00756992	0.53457	0.00757634	1.77239e-06	5.25008e-22	0.999987	1.1323e-05
CD_deLange_2017	chr9	136372044	rs4077515	LCL_meta	CARD9	0.999655	340	136272066	136471068	11.4074	19.4027	57.5799	178.868	240.043	236.325	0.0075757	0.00757988	0.534328	0.00759414	8.10229e-82	3.8326e-29	0.999655	0.000344889
CD_deLange_2017	chr10	30516551	rs2002695	LCL_meta	MAP3K8	0.996208	579	30417306	30616427	6.84127	6.55755	15.5653	14.2729	31.1886	29.8329	0.00761045	0.00761082	0.53188	0.00785478	2.33808e-09	6.42086e-10	0.996208	0.00379227
CD_deLange_2017	chr10	35207698	rs1148246	LCL_meta	CREM	0.992151	359	35109136	35302860	7.92216	14.1693	25.3051	93.5235	119.491	118.822	0.00765207	0.00765456	0.529042	0.0081701	1.78917e-43	7.57987e-14	0.992151	0.00784865
CD_deLange_2017	chr10	35207698	rs1148246	LCL_meta	CUL2	0.994636	359	35109136	35302860	7.92216	7.5551	25.3051	23.4253	49.7492	48.7238	0.00762977	0.00762109	0.530768	0.00798097	3.462e-13	5.27784e-14	0.994636	0.00536411
CD_deLange_2017	chr10	35207698	rs1148246	LCL_meta	ENSG00000230534	0.995198	359	35109136	35302860	7.92216	4.82339	25.3051	7.32677	33.7546	32.6233	0.00761914	0.00761882	0.531189	0.00793932	3.05505e-06	4.75449e-14	0.995198	0.00479913
CD_deLange_2017	chr10	35207698	rs1148246	LCL_meta	ENSG00000269952	0.993561	359	35109136	35302860	7.92216	7.01197	25.3051	18.841	44.9918	44.1391	0.00763372	0.00764138	0.530085	0.00805901	4.03426e-11	6.29331e-14	0.993561	0.00643905
CD_deLange_2017	chr10	73895870	rs2675670	LCL_meta	PLAU	0.000908337	219	73799109	73995819	6.67081	5.78727	16.0504	11.5272	24.8213	27.5774	0.00758788	0.00758153	0.00763957	0.533913	1.4001e-07	1.51847e-09	0.000908337	0.999092
CD_deLange_2017	chr10	79282718	rs1250573	LCL_meta	ZMIZ1	0.00887402	409	79182863	79382609	8.50279	5.14101	27.4333	5.99632	32.8724	33.4285	0.00765978	0.0076602	0.00824985	0.528339	3.57896e-05	1.75307e-14	0.00887402	0.99109
CD_deLange_2017	chr11	61790331	rs102275	LCL_meta	FADS1	0.997923	340	61690385	61890194	5.15663	5.15558	7.2642	6.47416	15.6659	13.7229	0.00759045	0.00759387	0.53314	0.00772659	3.18926e-06	1.44802e-06	0.997923	0.00207196
CD_deLange_2017	chr11	61790331	rs102275	LCL_meta	FADS2	0.996533	340	61690385	61890194	5.15663	12.9812	7.2642	75.5092	84.1977	82.7541	0.00760927	0.00760725	0.532179	0.00783649	5.52033e-36	2.40025e-06	0.996533	0.00346418
CD_deLange_2017	chr11	61790331	rs102275	LCL_meta	FADS3	0.997075	340	61690385	61890194	5.15663	5.9011	7.2642	10.2958	19.1551	17.547	0.0076021	0.00760182	0.532444	0.00779349	9.75509e-08	2.02216e-06	0.997075	0.00292263
CD_deLange_2017	chr11	61790331	rs102275	LCL_meta	TMEM258	0.00823559	340	61690385	61890194	5.15663	12.1142	7.2642	64.2184	70.8562	71.4805	0.00765802	0.00765747	0.00819858	0.52881	1.8553e-30	1.00754e-05	0.00823559	0.991754
CD_deLange_2017	chr11	64341646	rs647152	LCL_meta	CCDC88B	0.997535	262	64242407	64440421	5.10778	9.36056	7.41003	36.0016	45.165	43.3926	0.00758929	0.00759894	0.532967	0.00774619	5.69716e-19	1.49069e-06	0.997535	0.00246367
CD_deLange_2017	chr11	64341646	rs647152	LCL_meta	ENSG00000236935	0.00394429	262	64242407	64440421	5.10778	36.3882	7.41003	651.277	657.366	658.684	0.00761091	0.00761398	0.00787336	0.531858	2.03737e-285	8.65193e-06	0.00394429	0.996047
CD_deLange_2017	chr11	64341646	rs647152	LCL_meta	GPR137	0.997421	262	64242407	64440421	5.10778	4.21028	7.41003	3.72845	12.8756	11.1224	0.00760776	0.0075907	0.532895	0.00775769	6.02347e-05	1.51349e-06	0.997421	0.00251528
CD_deLange_2017	chr12	111634620	rs11065987	LCL_meta	SH2B3	0.998375	119	111535336	111731848	5.36364	4.78423	7.47712	4.71981	14.3324	12.1407	0.00758886	0.00758925	0.533539	0.00769568	1.49656e-05	9.49802e-07	0.998375	0.00160891
CD_deLange_2017	chr13	42343725	rs80244186	LCL_meta	TNFSF11	0.00551418	429	42244330	42443364	5.51327	16.7997	9.30438	132.242	140.547	141.545	0.00762791	0.00763132	0.00798537	0.53073	5.29215e-60	1.30363e-06	0.00551418	0.994485
CD_deLange_2017	chr13	43901262	rs1373904	LCL_meta	LACC1	8.49531e-11	443	43801684	44000146	7.46032	17.7195	20.4541	147.677	149.198	168.131	0.00756962	0.00757645	0.00757544	0.534567	1.03745e-66	1.85501e-11	8.49531e-11	1
CD_deLange_2017	chr14	103406988	rs7157631	LCL_meta	MARK3	0.00141401	394	103307790	103506653	5.21893	10.4781	7.86022	45.8025	51.3438	53.6624	0.00759177	0.00759232	0.00767803	0.533595	1.82338e-22	5.48342e-06	0.00141401	0.998581
CD_deLange_2017	chr16	10871740	rs6416647	LCL_meta	CIITA	0.999568	383	10771919	10971450	5.6573	5.43753	8.4784	7.56021	19.4622	15.9683	0.0075727	0.00757863	0.534335	0.00760279	2.40463e-07	9.60777e-08	0.999568	0.000432118
CD_deLange_2017	chr16	11251046	rs2021511	LCL_meta	ENSG00000262703	0.997249	632	11151542	11350869	5.94505	4.9869	10.0016	6.18126	17.8425	16.1748	0.0075933	0.00758957	0.532785	0.00777388	5.59048e-06	1.22479e-07	0.997249	0.00274556
CD_deLange_2017	chr16	28483100	rs42861	LCL_meta	CLN3	0.0115854	146	28462144	28582276	7.44311	5.09402	21.4471	8.31698	29.443	29.7596	0.00768039	0.00768488	0.00847063	0.526526	3.5384e-06	7.02627e-12	0.0115854	0.988411
CD_deLange_2017	chr16	28483100	rs42861	LCL_meta	IL27	0.986863	146	28462144	28582276	7.44311	4.02538	21.4471	3.15231	24.8323	24.5923	0.00772977	0.00769718	0.525523	0.00856093	0.000491634	5.5524e-12	0.986863	0.0126459
CD_deLange_2017	chr16	28860532	rs11859512	LCL_meta	ATP2A1	0.00355453	160	28811498	28959531	7.23494	6.82158	20.7097	16.965	36.2554	37.6732	0.0076132	0.00761354	0.00783569	0.532074	6.1219e-10	1.44743e-11	0.00355453	0.996445
CD_deLange_2017	chr16	28860532	rs11859512	LCL_meta	EIF3C	0.000853498	160	28811498	28959531	7.23494	10.3359	20.7097	46.2389	64.13	66.9481	0.00758727	0.00758348	0.0076383	0.534008	1.17788e-22	1.43899e-11	0.000853498	0.999147
CD_deLange_2017	chr16	28860532	rs11859512	LCL_meta	ENSG00000261766	0.992917	160	28811498	28959531	7.23494	5.23231	20.7097	8.68953	30.1512	29.3871	0.00764762	0.00764886	0.529539	0.0081094	1.13799e-06	6.85341e-12	0.992917	0.0070819
CD_deLange_2017	chr16	28860532	rs11859512	LCL_meta	NFATC2IP	0.993729	160	28811498	28959531	7.23494	4.87412	20.7097	7.17063	28.7463	27.8687	0.00764135	0.00763442	0.530333	0.00804361	4.63066e-06	6.09951e-12	0.993729	0.00626678
CD_deLange_2017	chr16	28860532	rs11859512	LCL_meta	TUFM	0.996812	160	28811498	28959531	7.23494	8.93672	20.7097	31.7611	53.9693	52.4461	0.00760602	0.00760079	0.532343	0.0078103	5.11854e-17	3.22402e-12	0.996812	0.00318845
CD_deLange_2017	chr16	85984057	rs17445836	LCL_meta	ENSG00000269667	0.999717	746	85884217	86084012	5.20874	9.91798	5.57342	39.906	49.3011	45.3816	0.00757645	0.00757732	0.534376	0.00759832	1.44809e-21	1.17843e-06	0.999717	0.000282169
CD_deLange_2017	chr16	85984057	rs17445836	LCL_meta	ENSG00000285163	0.999412	746	85884217	86084012	5.20874	4.61498	5.57342	2.98698	11.7812	8.52722	0.00758158	0.00758214	0.534142	0.00761808	2.85661e-05	2.15083e-06	0.999412	0.000550497
CD_deLange_2017	chr16	85984057	rs17445836	LCL_meta	IRF8	0.999551	746	85884217	86084012	5.20874	9.66364	5.57342	37.5839	46.564	43.1041	0.00757945	0.00757661	0.534251	0.00761168	2.2372e-20	1.78442e-06	0.999551	0.000447643
CD_deLange_2017	chr17	39887396	rs12936409	LCL_meta	GRB7	0.998634	276	39793671	39987295	8.93082	6.72657	33.7237	16.7786	52.817	50.4645	0.00758679	0.00758515	0.533736	0.00767403	7.2451e-11	3.16773e-18	0.998634	0.00136587
CD_deLange_2017	chr17	39887396	rs12936409	LCL_meta	GSDMB	1.1772e-05	276	39793671	39987295	8.93082	28.4426	33.7237	395.074	421.704	428.797	0.00756992	0.0075764	0.00757634	0.53457	3.73886e-174	3.20197e-17	1.1772e-05	0.999988
CD_deLange_2017	chr17	39887396	rs12936409	LCL_meta	IKZF3	0.99705	276	39793671	39987295	8.93082	7.87301	33.7237	23.4034	58.7097	57.1111	0.00760182	0.0076021	0.532444	0.00779349	2.00486e-13	6.60719e-18	0.99705	0.00295036
CD_deLange_2017	chr17	39887396	rs12936409	LCL_meta	MIEN1	0.998709	276	39793671	39987295	8.93082	6.1614	33.7237	13.0652	49.1601	46.752	0.00759357	0.00758252	0.533648	0.00766851	2.81008e-09	2.9936e-18	0.998709	0.00129141
CD_deLange_2017	chr17	39887396	rs12936409	LCL_meta	ZPBP2	0.000709834	276	39793671	39987295	8.93082	9.96859	33.7237	42.2801	73.0021	76.0037	0.00758112	0.00758192	0.00763129	0.534031	6.16481e-21	3.20594e-17	0.000709834	0.99929
CD_deLange_2017	chr17	42362183	rs744166	LCL_meta	STAT5A	0.00468871	349	42266197	42461423	7.05556	4.68094	17.4963	4.30201	20.6446	21.7976	0.00763127	0.00762232	0.00792812	0.531221	0.000193717	3.60125e-10	0.00468871	0.995118
CD_deLange_2017	chr17	42579643	rs78345139	LCL_meta	NAGLU	0.999629	214	42481341	42672816	5.85792	3.97755	10.1929	2.04247	15.8676	12.0818	0.00758349	0.00757648	0.53428	0.00759401	4.86885e-05	1.40393e-08	0.999629	0.000322387
CD_deLange_2017	chr19	46383942	rs4803937	LCL_meta	PPP5C	0.999674	634	46284100	46483572	5.09605	9.05794	6.37014	33.3344	43.4194	39.6437	0.00757504	0.00757506	0.534357	0.00759299	1.15113e-18	5.90968e-07	0.999674	0.000325605
CD_deLange_2017	chr20	46006273	rs3761158	LCL_meta	MMP9	0.995636	319	45908293	46106037	6.65455	6.58491	13.9014	14.48	29.5924	28.3705	0.00761644	0.00761849	0.531579	0.00790618	2.1865e-09	3.90072e-09	0.995636	0.0043636
CD_deLange_2017	chr20	63697746	rs6062496	LCL_meta	ARFRP1	0.999459	586	63597891	63796751	7.32335	7.51084	19.7967	20.5894	43.6179	40.346	0.00758269	0.00758106	0.534165	0.00761808	6.40481e-13	1.41475e-12	0.999459	0.000540688
CD_deLange_2017	chr22	21561877	rs5754100	LCL_meta	CCDC116	0.984579	132	21465221	21660953	8.18932	7.90327	28.1534	25.567	53.7798	53.7116	0.00772089	0.0077196	0.523831	0.00878348	1.07724e-13	8.10944e-15	0.984579	0.0154213
IBD_deLange_2017	chr1	1280044	rs1268339	LCL_meta	CCNL2	0.998996	373	1180614	1379664	5.56442	4.49036	7.95632	2.81168	13.4557	10.7385	0.0075871	0.00758619	0.533914	0.00764192	5.8051e-05	3.38429e-07	0.998996	0.000944546
IBD_deLange_2017	chr1	1280044	rs1268339	LCL_meta	INTS11	0.990628	373	1180614	1379664	5.56442	7.51537	7.95632	21.5631	30.0226	29.5152	0.00766126	0.00765927	0.527994	0.00829402	3.75236e-12	3.04465e-06	0.990628	0.00936881
IBD_deLange_2017	chr1	1790040	rs2272908	LCL_meta	ENSG00000268575	0.00145559	262	1694167	1888667	5.248	14.0422	7.84043	89.8295	95.3789	97.6691	0.00758808	0.00759011	0.00768327	0.533638	1.38082e-41	5.59289e-06	0.00145559	0.998539
IBD_deLange_2017	chr1	1790040	rs2272908	LCL_meta	GNB1-DT	0.99581	262	1694167	1888667	5.248	9.00137	7.84043	33.1858	42.2638	41.004	0.00761244	0.00761535	0.531769	0.00788375	1.59987e-17	1.62783e-06	0.99581	0.0041883
IBD_deLange_2017	chr1	1790040	rs2272908	LCL_meta	NADK	0.00479223	262	1694167	1888667	5.248	7.71941	7.84043	21.2561	27.9627	29.0951	0.00761938	0.00761976	0.00793768	0.53119	8.39034e-12	5.62512e-06	0.00479223	0.995202
IBD_deLange_2017	chr1	1790040	rs2272908	LCL_meta	TMEM52	0.997796	262	1694167	1888667	5.248	4.54602	7.84043	5.32832	15.0331	13.1454	0.00760316	0.00759691	0.533009	0.00773409	1.07048e-05	8.6741e-07	0.997796	0.00219226
IBD_deLange_2017	chr1	8108201	rs10746475	LCL_meta	ENSG00000284747	0.000880986	364	8008484	8208035	7.97561	13.0257	25.3966	76.1588	98.768	101.555	0.00757915	0.00758294	0.00764324	0.533945	1.19258e-35	1.3258e-13	0.000880986	0.999119
IBD_deLange_2017	chr1	8108201	rs10746475	LCL_meta	PARK7	0.989913	364	8008484	8208035	7.97561	6.3135	25.3966	13.9834	39.8167	39.3763	0.00767137	0.00767467	0.52754	0.00834958	7.86393e-09	8.69251e-14	0.989913	0.0100865
IBD_deLange_2017	chr1	46356475	rs112124254	LCL_meta	LURAP1	0.0167217	386	46256717	46456330	5.00613	9.47068	3.99908	37.3148	41.3085	41.3098	0.00773781	0.00774887	0.00890197	0.522665	9.10186e-19	0.000268274	0.0167217	0.98301
IBD_deLange_2017	chr1	46356475	rs112124254	LCL_meta	NSUN4	6.38117e-05	386	46256717	46456330	5.00613	33.1991	3.99908	540.101	538.696	544.1	0.0075763	0.00759836	0.00757993	0.534378	3.87916e-237	0.000260595	6.38117e-05	0.999676
IBD_deLange_2017	chr1	150706557	rs1336900	LCL_meta	HORMAD1	0.99782	280	150607202	150805089	6.625	6.26604	13.3229	14.4537	29.6361	27.7432	0.00759114	0.00759352	0.533174	0.00773179	1.16887e-09	3.6223e-09	0.99782	0.00217966
IBD_deLange_2017	chr1	150925201	rs72704682	LCL_meta	CERS2	0.983997	241	150825272	151023905	5.28462	7.13699	8.33302	18.7304	27.0973	27.0593	0.00772648	0.00772602	0.523378	0.00883999	1.03019e-10	3.37619e-06	0.983997	0.0159995
IBD_deLange_2017	chr1	150925201	rs72704682	LCL_meta	CTSS	0.995554	241	150825272	151023905	5.28462	23.5995	8.33302	270.859	280.369	279.166	0.00761754	0.00761157	0.531603	0.00790443	1.02466e-120	1.05678e-06	0.995554	0.00444467
IBD_deLange_2017	chr1	155194689	rs12411216	LCL_meta	SLC50A1	0.987142	240	155094807	155292822	6.5873	5.12199	14.3457	7.89527	22.4618	22.237	0.00770143	0.00769581	0.525591	0.00856957	4.32007e-06	6.82029e-09	0.987142	0.0128538
IBD_deLange_2017	chr1	155464151	rs12724079	LCL_meta	RUSC1-AS1	0.0158215	67	155364745	155557222	5.38346	8.22489	9.63076	28.4628	38.0326	38.0804	0.00772816	0.00772834	0.00882685	0.523447	6.40853e-15	9.67e-07	0.0158215	0.984178
IBD_deLange_2017	chr1	155780574	rs2948071	LCL_meta	FDPS	0.99246	91	155682290	155879929	5.41985	5.39636	9.14508	9.96341	19.7963	19.0897	0.00764836	0.00764809	0.529211	0.00814815	3.39537e-07	7.69603e-07	0.99246	0.00753861
IBD_deLange_2017	chr1	155780574	rs2948071	LCL_meta	GON4L	0.995775	91	155682290	155879929	5.41985	4.6539	9.14508	5.46408	15.8387	14.5821	0.00761381	0.00761463	0.531699	0.0078914	1.76644e-05	4.45152e-07	0.995775	0.00420647
IBD_deLange_2017	chr1	155780574	rs2948071	LCL_meta	RIT1	0.0154784	91	155682290	155879929	5.41985	7.0813	9.14508	19.0371	28.1089	28.1742	0.00772053	0.00772597	0.00878907	0.5237	7.89888e-11	1.56291e-06	0.0154784	0.98452
IBD_deLange_2017	chr1	155780574	rs2948071	LCL_meta	SCAMP3	0.98496	91	155682290	155879929	5.41985	4.21541	9.14508	3.34416	12.5967	12.4799	0.00774515	0.00771821	0.524101	0.00871591	0.000461319	1.39052e-06	0.98496	0.0145745
IBD_deLange_2017	chr1	155780574	rs2948071	LCL_meta	YY1AP1	0.99413	91	155682290	155879929	5.41985	7.02376	9.14508	17.9149	27.9745	27.0348	0.00762812	0.00763369	0.530428	0.00801454	9.50023e-11	6.11954e-07	0.99413	0.00586958
IBD_deLange_2017	chr1	160881744	rs7532133	LCL_meta	ITLN1	0.986121	531	160783249	160981733	5.88806	6.00117	10.5285	10.9364	21.6214	21.4621	0.00770568	0.0077109	0.524717	0.00866014	2.2039e-07	3.31617e-07	0.986121	0.0138788
IBD_deLange_2017	chr1	169632871	rs6666554	LCL_meta	SELP	0.979432	683	169533165	169732763	4.904	4.09073	5.41454	1.6251	7.04131	7.03849	0.00797717	0.00777734	0.520083	0.00894569	0.00295295	6.50886e-05	0.979432	0.0167994
IBD_deLange_2017	chr2	24972708	rs76286777	LCL_meta	ADCY3	6.12228e-05	429	24873637	25071549	6.59603	16.0291	15.1466	119.271	128.973	134.418	0.00757569	0.00757528	0.00758029	0.534598	2.25258e-54	3.74333e-09	6.12228e-05	0.999939
IBD_deLange_2017	chr2	43224818	rs149290349	LCL_meta	ENSG00000234936	0.996227	366	43125749	43324277	6.55365	7.59716	13.7783	20.5017	35.6258	34.2655	0.00761659	0.00761206	0.5319	0.00785115	4.63474e-12	3.85197e-09	0.996227	0.00377297
IBD_deLange_2017	chr2	61210352	rs12998475	LCL_meta	ENSG00000271889	0.987322	324	61111052	61310079	6.12598	6.36354	12.4574	14.9962	27.6867	27.4496	0.00769355	0.00770203	0.525727	0.00855735	3.51393e-09	4.45532e-08	0.987322	0.0126779
IBD_deLange_2017	chr2	61445178	rs2694624	LCL_meta	ENSG00000273302	0.00652988	293	61345187	61545122	5.69767	7.27908	10.3676	20.3329	29.8592	30.699	0.0076423	0.0076372	0.00806699	0.529979	2.11985e-11	4.50702e-07	0.00652988	0.99347
IBD_deLange_2017	chr2	101997084	rs13022757	LCL_meta	IL1R2	0.999634	420	101897762	102096596	6.20161	10.0066	11.4555	41.8933	56.8799	53.2206	0.00757956	0.00757323	0.534296	0.00759984	2.65554e-22	4.39274e-09	0.999634	0.000366156
IBD_deLange_2017	chr2	102572326	rs11123938	LCL_meta	ENSG00000234389	0.998925	494	102472618	102672147	6.53103	6.50413	13.8342	13.5989	29.9907	27.4013	0.00758648	0.00758169	0.53378	0.00764986	1.36619e-09	1.07912e-09	0.998925	0.00107457
IBD_deLange_2017	chr2	218181399	rs62183956	LCL_meta	ENSG00000261338	0.000831596	202	218082398	218279775	6.24	18.6146	13.803	164.247	175.206	178.049	0.00758376	0.0075811	0.00763516	0.534068	6.61821e-74	1.43693e-08	0.000831596	0.999168
IBD_deLange_2017	chr2	218181399	rs62183956	LCL_meta	TMBIM1	0.000363033	202	218082398	218279775	6.24	23.6824	13.803	272.905	283.039	286.708	0.00757993	0.00757943	0.00760528	0.534328	4.27305e-121	1.43611e-08	0.000363033	0.999637
IBD_deLange_2017	chr2	233271044	rs3792111	LCL_meta	ATG16L1	0.995888	472	233171907	233370649	11.2177	5.84579	55.8228	10.1886	67.2821	66.0046	0.00761256	0.00761044	0.531781	0.00787768	1.50418e-07	2.28291e-27	0.995888	0.00411205
IBD_deLange_2017	chr3	48717444	rs9834996	LCL_meta	PRKAR2A-AS1	0.996071	156	48621034	48815206	7.79348	5.69556	24.6183	11.1584	37.0723	35.7515	0.00761036	0.00760911	0.531979	0.00786191	5.56009e-08	7.93324e-14	0.996071	0.00392934
IBD_deLange_2017	chr3	48717444	rs9834996	LCL_meta	SLC26A6	0.00127319	156	48621034	48815206	7.79348	10.1579	24.6183	45.3835	67.5792	70.001	0.00758876	0.00758409	0.00766489	0.533646	2.77256e-22	2.88945e-13	0.00127319	0.998727
IBD_deLange_2017	chr3	49676792	rs1131095	LCL_meta	APEH	0.998727	215	49578191	49776393	12.4809	8.61631	71.2077	31.4676	105.05	102.628	0.00758876	0.00758409	0.533646	0.00766489	2.84904e-17	1.56877e-34	0.998727	0.00127291
IBD_deLange_2017	chr3	49676792	rs1131095	LCL_meta	PRKAR2A	0.998214	215	49578191	49776393	12.4809	6.12695	71.2077	13.0807	86.3437	84.2547	0.00759147	0.00759393	0.533406	0.00770679	3.79304e-09	2.16233e-34	0.998214	0.00178557
IBD_deLange_2017	chr3	49921715	rs35275715	LCL_meta	RNF123	0.999288	241	49823245	50021177	7.70161	5.09711	22.9109	7.30824	33.1549	30.1561	0.00758192	0.00758112	0.534031	0.00763129	5.04634e-07	8.44877e-14	0.999288	0.000711795
IBD_deLange_2017	chr3	49921715	rs35275715	LCL_meta	UBA7	0.991782	241	49823245	50021177	7.70161	7.20264	22.9109	19.0017	42.5319	41.9059	0.00765415	0.00765504	0.528876	0.00819579	4.32172e-11	8.66925e-13	0.991782	0.00821833
IBD_deLange_2017	chr3	50127668	rs2624848	LCL_meta	RBM6	0.00137828	232	50027841	50223036	6.504	27.3353	15.0669	364.254	376.976	379.32	0.00759006	0.00759264	0.00767839	0.53353	9.10512e-161	4.06888e-09	0.00137828	0.998622
IBD_deLange_2017	chr3	101304904	rs503734	LCL_meta	IMPG2	0.997337	371	101205012	101404499	5.58065	4.12116	8.14351	3.21375	13.0819	11.3449	0.00760171	0.00759129	0.532802	0.00776415	0.000101966	7.36028e-07	0.997337	0.00255852
IBD_deLange_2017	chr3	101304904	rs503734	LCL_meta	SENP7	0.988759	371	101205012	101404499	5.58065	16.0693	8.14351	119.88	128.361	128.017	0.00768612	0.00767647	0.526838	0.00844191	8.90294e-55	2.98761e-06	0.988759	0.0112379
IBD_deLange_2017	chr5	10682118	rs7715399	LCL_meta	DAP	0.997759	589	10582465	10781518	5.06977	21.4691	6.19392	220.426	228.464	226.595	0.00759395	0.00759809	0.533002	0.00773757	4.19033e-99	4.59312e-06	0.997759	0.00223607
IBD_deLange_2017	chr5	132617818	rs17772583	LCL_meta	IRF1-AS1	0.997993	243	132520324	132715000	5.49801	4.12922	7.91629	1.91304	11.9126	9.79792	0.00761115	0.00759502	0.533193	0.00770033	0.000261878	6.45653e-07	0.997993	0.00173916
IBD_deLange_2017	chr5	142216955	rs2961704	LCL_meta	NDFIP1	0.99754	535	142117014	142315884	6.42731	14.6423	13.9259	100.589	116.271	114.496	0.00759126	0.00760567	0.532883	0.00775	5.0666e-47	2.20235e-09	0.99754	0.00245958
IBD_deLange_2017	chr5	177371039	rs56235845	LCL_meta	RGS14	0.999313	182	177272267	177469411	6.35507	6.70933	13.0046	15.7438	31.6863	28.654	0.00757902	0.00758299	0.534147	0.00761906	1.09213e-10	1.69104e-09	0.999313	0.000687086
IBD_deLange_2017	chr6	167019278	rs35171809	LCL_meta	CCR6	0.994132	521	166919663	167119267	8.84553	4.18155	31.5588	4.80659	37.3084	36.3616	0.00763692	0.00763241	0.530451	0.0080082	4.55734e-05	1.09674e-16	0.994132	0.00582277
IBD_deLange_2017	chr6	167019278	rs35171809	LCL_meta	ENSG00000227598	8.99944e-05	521	166919663	167119267	8.84553	10.7876	31.5588	52.0666	78.5648	83.6254	0.00757378	0.00757892	0.00758573	0.534513	3.46013e-25	2.79121e-16	8.99944e-05	0.99991
IBD_deLange_2017	chr6	167019278	rs35171809	LCL_meta	ENSG00000285730	0.000154356	521	166919663	167119267	8.84553	8.18153	31.5588	28.0761	55.1136	59.6349	0.00758082	0.00757803	0.0075863	0.534406	9.0886e-15	2.79127e-16	0.000154356	0.999846
IBD_deLange_2017	chr7	2750246	rs798502	LCL_meta	AMZ1	0.995696	529	2650532	2849616	5.24818	14.2739	6.98561	93.4911	101.701	100.465	0.00761731	0.00761326	0.531576	0.00790058	1.04718e-43	3.87851e-06	0.995696	0.00430014
IBD_deLange_2017	chr7	2750246	rs798502	LCL_meta	CARD11	0.98853	529	2650532	2849616	5.24818	5.74053	6.98561	10.2963	17.6059	17.2799	0.0076812	0.00768167	0.526581	0.00845678	3.52073e-07	9.64918e-06	0.98853	0.0114595
IBD_deLange_2017	chr7	2750246	rs798502	LCL_meta	TTYH3	0.997629	529	2650532	2849616	5.24818	6.66715	6.98561	15.665	24.4535	22.6404	0.00759809	0.00759992	0.532822	0.00775575	3.68884e-10	2.16964e-06	0.997629	0.00236921
IBD_deLange_2017	chr7	99171402	rs4236540	LCL_meta	SMURF1	0.995356	351	99073405	99264292	5.82734	10.9829	10.2755	52.507	63.9317	62.7704	0.00762182	0.00762005	0.531367	0.00791816	7.11357e-26	1.55917e-07	0.995356	0.00464399
IBD_deLange_2017	chr7	100663304	rs221785	LCL_meta	GIGYF1	0.00417246	237	100565492	100762174	4.49701	8.32299	4.27001	27.2964	30.3002	31.565	0.00761632	0.00763214	0.00789111	0.531588	1.99623e-14	0.000200146	0.00417246	0.995627
IBD_deLange_2017	chr7	100663304	rs221785	LCL_meta	TFR2	0.997706	237	100565492	100762174	4.49701	8.70013	4.27001	30.7016	36.7836	34.9259	0.00759423	0.00760301	0.532956	0.00774029	1.0773e-16	3.25024e-05	0.997706	0.00226104
IBD_deLange_2017	chr7	107840456	rs10953551	LCL_meta	LAMB1	0.998706	462	107740572	107940394	8.13386	4.55803	24.8237	4.51217	31.7332	29.3162	0.0075813	0.00758196	0.533724	0.00766553	1.41615e-05	2.1378e-14	0.998706	0.00127935
IBD_deLange_2017	chr8	48506001	rs13263338	LCL_meta	LINC02947	0.00680496	175	48406519	48602333	5.14685	17.3281	7.55939	140.863	147.616	148.417	0.00764121	0.00763959	0.00808869	0.529847	9.6019e-64	7.50496e-06	0.00680496	0.993188
IBD_deLange_2017	chr9	4984530	rs1887428	LCL_meta	JAK2	0.999987	423	4884546	5084215	12.542	4.78425	69.0818	3.16336	78.0712	70.9362	0.0075764	0.00756992	0.53457	0.00757634	1.76755e-06	4.15911e-35	0.999987	1.12909e-05
IBD_deLange_2017	chr9	136374746	rs3829110	LCL_meta	CARD9	0.999488	337	136274844	136474610	12.592	19.4027	71.8256	178.877	253.93	250.603	0.00758202	0.00757947	0.534215	0.00761468	1.1612e-81	3.60084e-35	0.999488	0.000511519
IBD_deLange_2017	chr10	30401447	rs10826797	LCL_meta	MAP3K8	0.996988	446	30301492	30501432	7.27941	6.73512	19.4005	16.027	36.997	35.4189	0.00760267	0.00760626	0.532445	0.00779472	3.24563e-10	1.11278e-11	0.996988	0.00301193
IBD_deLange_2017	chr10	31937527	rs12264039	LCL_meta	KIF5B	0.998941	319	31837730	32037109	5.01389	6.99589	6.33522	18.2773	27.1865	24.5802	0.00758047	0.00758275	0.533793	0.00765202	1.24821e-11	1.91779e-06	0.998941	0.00105699
IBD_deLange_2017	chr10	35066474	rs9299717	LCL_meta	CREM	0.986257	380	34966937	35166408	7.33846	14.2349	20.7503	94.5628	115.476	115.308	0.00770167	0.00770982	0.524984	0.00865065	1.05112e-43	1.19802e-11	0.986257	0.0137435
IBD_deLange_2017	chr10	35066474	rs9299717	LCL_meta	CUL2	0.992357	380	34966937	35166408	7.33846	7.47805	20.7503	23.8026	45.2427	44.5487	0.00764301	0.00765261	0.529181	0.00815856	3.30686e-13	7.00718e-12	0.992357	0.0076428
IBD_deLange_2017	chr10	35066474	rs9299717	LCL_meta	ENSG00000230534	0.991263	380	34966937	35166408	7.33846	4.71354	20.7503	7.03338	28.3498	27.7791	0.00765851	0.00766193	0.528541	0.00823676	7.19212e-06	7.94069e-12	0.991263	0.00873007
IBD_deLange_2017	chr10	35066474	rs9299717	LCL_meta	ENSG00000269952	0.99144	380	34966937	35166408	7.33846	6.86324	20.7503	18.6403	39.9741	39.3851	0.0076596	0.00765585	0.528669	0.00822597	6.43427e-11	7.79662e-12	0.99144	0.00855986
IBD_deLange_2017	chr10	79282718	rs1250573	LCL_meta	ZMIZ1	0.992618	409	79182863	79382609	7.10145	5.14101	17.5549	5.99632	24.2756	23.5474	0.00764431	0.007647	0.529375	0.00813587	1.72832e-05	1.65171e-10	0.992618	0.00736508
IBD_deLange_2017	chr10	92669710	rs7918084	LCL_meta	KIF11	0.00292286	317	92569835	92769637	5.68	5.05784	9.05926	6.36855	13.819	15.4274	0.00760748	0.00760727	0.00779496	0.532372	2.44403e-05	1.65781e-06	0.00292286	0.997051
IBD_deLange_2017	chr11	1852991	rs907612	LCL_meta	LSP1	0.993198	455	1753436	1944876	5.15789	6.27148	5.42747	12.2011	18.4303	17.6244	0.00764297	0.00763992	0.529888	0.00809036	3.229e-08	2.82244e-05	0.993198	0.00677357
IBD_deLange_2017	chr12	9736291	rs10844640	LCL_meta	CD69	0.998531	645	9639106	9836128	5.11852	4.4014	5.76077	4.2662	12.3162	10.016	0.007592	0.00758798	0.533544	0.00768027	2.02107e-05	4.53176e-06	0.998531	0.0014408
IBD_deLange_2017	chr12	9736291	rs10844640	LCL_meta	ENSG00000272917	0.997847	645	9639106	9836128	5.11852	4.90684	5.76077	6.56513	14.2268	12.3166	0.00758903	0.00759641	0.533095	0.00773173	2.99013e-06	6.69027e-06	0.997847	0.00214259
IBD_deLange_2017	chr12	111494996	rs7137828	LCL_meta	SH2B3	0.998863	110	111395083	111591487	6.21429	4.78423	12.9259	5.88702	21.2653	18.7285	0.00759101	0.00758915	0.533768	0.00765933	3.39375e-06	2.97608e-09	0.998863	0.00113399
IBD_deLange_2017	chr13	43904684	rs7995004	LCL_meta	LACC1	1.89488e-07	438	43805686	44003634	5.62838	17.7195	8.92159	147.688	145.387	156.609	0.00756962	0.00757544	0.00757645	0.534567	1.02574e-66	1.89151e-06	1.89488e-07	0.999998
IBD_deLange_2017	chr16	10870261	rs6498114	LCL_meta	CIITA	0.999709	384	10770493	10970169	5.41611	5.43753	7.50581	7.5576	18.849	14.9601	0.00758073	0.00757406	0.534415	0.00759344	1.68043e-07	1.7682e-07	0.999709	0.00029075
IBD_deLange_2017	chr16	28478021	rs28374519	LCL_meta	CLN3	0.984263	138	28462144	28577122	8.06569	5.09402	26.2841	8.28502	34.6141	34.5624	0.00772469	0.00772333	0.523521	0.00881245	3.50256e-06	5.33838e-14	0.984263	0.0157335
IBD_deLange_2017	chr16	28478021	rs28374519	LCL_meta	IL27	0.988317	138	28462144	28577122	8.06569	4.02538	26.2841	3.17899	29.7982	29.455	0.00771165	0.00768652	0.526423	0.00844729	0.000431079	3.96932e-14	0.988317	0.0112523
IBD_deLange_2017	chr16	28478021	rs28374519	LCL_meta	SULT1A1	0.00033773	138	28462144	28577122	8.06569	7.49255	26.2841	21.8774	44.422	48.1613	0.00757988	0.0075757	0.00759414	0.534328	4.47272e-12	5.45175e-14	0.00033773	0.999662
IBD_deLange_2017	chr16	28839050	rs62036658	LCL_meta	ATP2A1	0.00359082	147	28741505	28938730	7.68504	6.82158	24.4242	17.0496	40.0632	41.4722	0.0076109	0.0076159	0.00784435	0.531983	5.62533e-10	3.52911e-13	0.00359082	0.996409
IBD_deLange_2017	chr16	28839050	rs62036658	LCL_meta	EIF3C	0.000675927	147	28741505	28938730	7.68504	10.3359	24.4242	46.3236	67.6986	70.7474	0.00757783	0.00758009	0.00761949	0.53414	1.08074e-22	3.5045e-13	0.000675927	0.999324
IBD_deLange_2017	chr16	28839050	rs62036658	LCL_meta	ENSG00000261766	0.991241	147	28741505	28938730	7.68504	5.23231	24.4242	8.77283	33.7556	33.1863	0.00765998	0.0076629	0.528359	0.00824857	1.27327e-06	2.03124e-13	0.991241	0.00875753
IBD_deLange_2017	chr16	28839050	rs62036658	LCL_meta	NFATC2IP	0.99286	147	28741505	28938730	7.68504	4.87412	24.4242	7.25429	32.4256	31.6678	0.00764108	0.00764691	0.529517	0.00811929	4.7996e-06	1.67772e-13	0.99286	0.00713489
IBD_deLange_2017	chr16	28839050	rs62036658	LCL_meta	TUFM	0.986202	147	28741505	28938730	7.68504	8.93672	24.4242	31.8458	56.4267	56.2632	0.00770697	0.00770407	0.524887	0.00864838	1.82927e-16	3.05683e-13	0.986202	0.0137984
IBD_deLange_2017	chr17	39887396	rs12936409	LCL_meta	GRB7	0.998491	276	39793671	39987295	11.3387	6.72657	57.1459	16.7786	76.1444	73.8899	0.00758165	0.00758942	0.533701	0.007685	7.95879e-11	2.34422e-28	0.998491	0.00150864
IBD_deLange_2017	chr17	39887396	rs12936409	LCL_meta	IKZF3	0.997095	276	39793671	39987295	11.3387	7.87301	57.1459	23.4034	82.1456	80.533	0.00760352	0.00760077	0.532613	0.00778405	1.97744e-13	4.38301e-28	0.997095	0.00290526
IBD_deLange_2017	chr17	39887396	rs12936409	LCL_meta	MIEN1	0.99851	276	39793671	39987295	11.3387	6.1614	57.1459	13.0652	72.446	70.1789	0.00758442	0.00758648	0.533607	0.00768603	3.2158e-09	2.30899e-28	0.99851	0.00149018
IBD_deLange_2017	chr17	39887396	rs12936409	LCL_meta	ZPBP2	0.000835827	276	39793671	39987295	11.3387	9.96859	57.1459	42.2801	96.5872	99.4257	0.00758376	0.0075811	0.00763516	0.534068	6.16599e-21	2.15649e-27	0.000835827	0.999164
IBD_deLange_2017	chr17	40663193	rs16966101	LCL_meta	CCR7	0.997954	284	40563547	40762944	5.19753	7.87649	5.49592	23.3511	30.7771	28.8176	0.00758989	0.0075925	0.533224	0.00772628	1.48927e-13	8.46342e-06	0.997954	0.0020379
IBD_deLange_2017	chr17	40663193	rs16966101	LCL_meta	ENSG00000278834	0.99518	284	40563547	40762944	5.19753	5.20796	5.49592	7.50631	14.1237	12.9921	0.00762093	0.00762058	0.531195	0.0079402	2.55645e-06	1.90863e-05	0.99518	0.00479756
IBD_deLange_2017	chr17	40663193	rs16966101	LCL_meta	IGFBP4	0.997277	284	40563547	40762944	5.19753	4.22458	5.49592	2.80695	10.0386	8.28769	0.00760699	0.00759802	0.532694	0.00776814	0.000151595	1.02889e-05	0.997277	0.00252487
IBD_deLange_2017	chr17	40663193	rs16966101	LCL_meta	SMARCE1	0.996807	284	40563547	40762944	5.19753	4.49012	5.49592	4.26781	11.2927	9.7509	0.00761918	0.00760419	0.532373	0.00780302	4.33284e-05	1.26636e-05	0.996807	0.00312639
IBD_deLange_2017	chr19	10567956	rs1465702	LCL_meta	ENSG00000267197	0.00113531	448	10468798	10667497	6.34132	5.08781	12.5463	5.44383	15.4552	17.99	0.00758795	0.00758681	0.0076541	0.533856	6.13787e-05	5.051e-08	0.00113531	0.998803
IBD_deLange_2017	chr19	46636823	rs12984626	LCL_meta	PTGIR	0.996787	374	46537206	46736662	5.10884	9.05593	6.44607	33.6431	41.5936	40.0764	0.00760602	0.00760079	0.532343	0.0078103	7.7479e-18	5.01657e-06	0.996787	0.00320757
IBD_deLange_2017	chr20	46006273	rs3761158	LCL_meta	MMP9	0.984829	319	45908293	46106037	4.97638	6.58491	5.41759	14.48	19.9797	19.894	0.00771673	0.00773213	0.52399	0.00875991	6.8744e-09	5.94068e-05	0.984829	0.015112
IBD_deLange_2017	chr20	63697746	rs6062496	LCL_meta	ARFRP1	0.990249	585	63597891	63796751	10.6202	7.51084	46.6778	20.5911	67.7379	67.2666	0.00766668	0.00766894	0.527714	0.00832547	1.02726e-11	4.81394e-23	0.990249	0.00975111
IBD_deLange_2017	chr22	21561877	rs5754100	LCL_meta	CCDC116	0.983921	132	21465221	21660953	8.08125	7.90327	27.0077	25.567	52.5981	52.5643	0.007731	0.00772796	0.523229	0.0088444	1.11876e-13	2.64766e-14	0.983921	0.016079
IBD_deLange_2017	chr22	22914089	rs455941	LCL_meta	IGLL5	0.99969	316	22814988	23013933	5.08609	4.26822	4.99444	2.58121	11.3935	7.44751	0.00757923	0.00757643	0.534387	0.00759835	2.358e-05	2.11024e-06	0.99969	0.000274785
IBD_deLange_2017	chr22	30174454	rs1978083	LCL_meta	ASCC2	0.998337	276	30075690	30274102	6.20567	11.1858	12.9045	55.6954	70.7123	68.5533	0.00759002	0.00758594	0.53345	0.00769715	1.11382e-27	4.27008e-09	0.998337	0.00166289
IBD_deLange_2017	chr22	30174454	rs1978083	LCL_meta	HORMAD2-AS1	0.998434	276	30075690	30274102	6.20567	5.9767	12.9045	11.4028	26.4868	24.2681	0.00758764	0.00758886	0.53353	0.00769333	1.79292e-08	3.9944e-09	0.998434	0.00156571
IBD_deLange_2017	chr22	30174454	rs1978083	LCL_meta	ZMAT5	0.998262	276	30075690	30274102	6.20567	6.75802	12.9045	17.0464	32.0295	29.9136	0.00759206	0.00758764	0.533439	0.00770651	7.02476e-11	4.41781e-09	0.998262	0.0017381
MS_Patsopoulos_2019	chr1	2791865	rs10909839	LCL_meta	TTC34	0.999366	181	2768000	2890190	8.2021	11.5667	27.2344	59.4711	89.6869	86.5734	0.00758242	0.00757927	0.534146	0.00762299	1.06927e-29	1.06935e-15	0.999366	0.000633887
MS_Patsopoulos_2019	chr1	85264137	rs35486093	LCL_meta	BCL10	0.00836551	453	85164147	85363722	6.39564	8.91673	13.8515	31.7245	44.9649	45.5746	0.00765377	0.00764878	0.00820706	0.528761	2.39776e-16	1.38569e-08	0.00836551	0.991634
MS_Patsopoulos_2019	chr1	110330874	rs61787370	LCL_meta	RBM15-AS1	0.998806	487	110231347	110430586	5.21181	5.95549	7.67558	11.8715	22.0088	19.5224	0.00758875	0.00758077	0.533699	0.00766065	8.46315e-09	5.61471e-07	0.998806	0.00119296
MS_Patsopoulos_2019	chr1	116547871	rs10801908	LCL_meta	CD58	0.999324	159	116450785	116645482	8.15344	10.1046	26.8369	43.6064	73.3881	70.3392	0.00757783	0.00758009	0.53414	0.00761949	8.60299e-23	1.65085e-15	0.999324	0.000675858
MS_Patsopoulos_2019	chr1	157716547	rs2317231	LCL_meta	FCRL3	0.99582	400	157616726	157815354	6.00595	20.9047	11.6602	208.437	221.342	220.08	0.00761244	0.00761535	0.531769	0.00788375	1.23114e-93	3.54514e-08	0.99582	0.00418029
MS_Patsopoulos_2019	chr1	160193656	rs3747621	LCL_meta	PEA15	0.0143835	346	160094628	160293334	5.09765	4.57104	5.34443	4.6919	9.90568	10.0344	0.00772512	0.00771712	0.00870649	0.52443	0.000133352	6.93683e-05	0.0143835	0.985377
MS_Patsopoulos_2019	chr1	160420194	rs3737798	LCL_meta	SLAMF6	0.997787	295	160321769	160520184	5.26526	10.111	6.31446	42.0906	50.2597	48.3785	0.00759196	0.00759582	0.532971	0.00774093	1.16814e-21	4.028e-06	0.997787	0.00220859
MS_Patsopoulos_2019	chr1	160734175	rs983494	LCL_meta	SLAMF7	0.99457	420	160634355	160834012	5.07478	22.2635	6.01079	238.178	245.193	244.177	0.00763005	0.00762385	0.530702	0.00798218	1.90518e-106	1.28395e-05	0.99457	0.00541715
MS_Patsopoulos_2019	chr2	112013222	rs57116599	LCL_meta	TMEM87B	0.992397	412	111913350	112113153	5.95556	7.20253	10.5979	18.4786	29.7706	29.072	0.0076435	0.00764395	0.529285	0.00815346	6.75615e-11	1.78756e-07	0.992397	0.00760279
MS_Patsopoulos_2019	chr2	230257114	rs35540610	LCL_meta	CAB39	0.99953	614	230157661	230356537	6.98352	6.98963	16.5825	17.0176	36.9675	33.5563	0.00757948	0.00757626	0.534262	0.00761237	1.98874e-11	3.07162e-11	0.99953	0.000469976
MS_Patsopoulos_2019	chr2	230257114	rs35540610	LCL_meta	ENSG00000225963	0.999495	614	230157661	230356537	6.98352	8.87095	16.5825	31.5337	51.4075	48.068	0.00758202	0.00757947	0.534215	0.00761468	1.0655e-17	3.31619e-11	0.999495	0.000505143
MS_Patsopoulos_2019	chr2	230257114	rs35540610	LCL_meta	SLC16A14	0.999459	614	230157661	230356537	6.98352	10.5565	16.5825	47.7495	67.5519	64.2809	0.00758269	0.00758106	0.534165	0.00761808	1.03801e-24	3.56261e-11	0.999459	0.0005412
MS_Patsopoulos_2019	chr2	230257114	rs35540610	LCL_meta	SP100	0.999426	614	230157661	230356537	6.98352	8.93492	16.5825	31.8957	51.65	48.4368	0.00757942	0.00757795	0.534183	0.00762193	8.35795e-18	3.7365e-11	0.999426	0.00057368
MS_Patsopoulos_2019	chr2	230257114	rs35540610	LCL_meta	SP110	0.999436	614	230157661	230356537	6.98352	17.8827	16.5825	150.845	170.602	167.371	0.00758035	0.00757774	0.534182	0.00762128	1.82782e-69	3.72542e-11	0.999436	0.000563503
MS_Patsopoulos_2019	chr2	230257114	rs35540610	LCL_meta	SP140	0.999438	614	230157661	230356537	6.98352	31.8814	16.5825	498.024	517.774	514.54	0.00758035	0.00757774	0.534182	0.00762128	3.07011e-220	3.75289e-11	0.999438	0.000561753
MS_Patsopoulos_2019	chr3	28030595	rs438613	LCL_meta	EOMES	0.989742	433	27931312	28130261	8.31166	10.9572	27.5294	50.5933	78.5437	78.1185	0.00766965	0.00766806	0.527436	0.00836394	1.00666e-24	1.0455e-14	0.989742	0.0102584
MS_Patsopoulos_2019	chr3	28030595	rs438613	LCL_meta	LINC02084	0.999397	433	27931312	28130261	8.31166	7.4068	27.5294	20.606	51.2407	48.0776	0.00757935	0.00757915	0.534173	0.00762243	7.14487e-13	7.03345e-16	0.999397	0.000603144
MS_Patsopoulos_2019	chr3	121792578	rs13075144	LCL_meta	EAF2	0.992841	470	121692797	121892321	5.95116	24.4673	12.2198	290.714	303.679	302.926	0.00763827	0.0076425	0.529707	0.00811599	3.77221e-129	3.35216e-08	0.992841	0.00715944
MS_Patsopoulos_2019	chr3	121792578	rs13075144	LCL_meta	GOLGB1	0.997209	470	121692797	121892321	5.95116	6.21407	12.2198	12.9224	26.7856	25.1333	0.00759641	0.00760601	0.532635	0.00777936	6.71588e-09	1.35764e-08	0.997209	0.00279056
MS_Patsopoulos_2019	chr3	121792578	rs13075144	LCL_meta	IQCB1	0.991898	470	121692797	121892321	5.95116	26.2378	12.2198	336.002	348.854	348.214	0.00765309	0.00765495	0.52895	0.00819296	9.09333e-149	3.7624e-08	0.991898	0.00810236
MS_Patsopoulos_2019	chr5	177363161	rs67111717	LCL_meta	RGS14	0.998861	198	177264278	177463066	5.02785	6.70933	7.03531	15.6591	25.1747	22.6408	0.00758348	0.00758941	0.533786	0.00766155	1.88011e-10	1.04666e-06	0.998861	0.0011376
MS_Patsopoulos_2019	chr6	135512325	rs4896153	LCL_meta	AHI1	0.998192	142	135413172	135612254	7.37479	33.5883	21.197	554.019	577.189	575.112	0.0075944	0.00758692	0.53334	0.00771173	4.87809e-244	1.22867e-12	0.998192	0.00180809
MS_Patsopoulos_2019	chr6	135512325	rs4896153	LCL_meta	AHI1-DT	0.997111	142	135413172	135612254	7.37479	4.37479	21.197	3.95699	26.7524	25.1158	0.00760898	0.00759825	0.53255	0.00777732	5.50815e-05	1.79132e-12	0.997111	0.0028344
MS_Patsopoulos_2019	chr6	135512325	rs4896153	LCL_meta	ENSG00000234084	0.998812	142	135413172	135612254	7.37479	11.5986	21.197	59.0287	82.613	80.1222	0.00758891	0.00758165	0.533713	0.00766052	3.01785e-29	8.11726e-13	0.998812	0.00118766
MS_Patsopoulos_2019	chr6	137116920	rs62420820	LCL_meta	IFNGR1	0.999608	304	137017711	137215318	7.31911	5.30614	19.5651	7.44297	30.4998	26.9073	0.00757636	0.00757758	0.534325	0.00760788	2.52705e-07	1.37438e-12	0.999608	0.000391841
MS_Patsopoulos_2019	chr7	37342861	rs60600003	LCL_meta	ELMO1	0.99976	629	37243294	37442822	5.0597	7.99376	5.6096	22.8054	32.388	28.3041	0.0075753	0.0075772	0.534433	0.00759553	3.32411e-14	9.76849e-07	0.99976	0.0002393
MS_Patsopoulos_2019	chr7	149592373	rs354033	LCL_meta	ZNF777	0.999055	386	149492546	149692267	5.69901	6.88345	10.4527	17.3593	30.4932	27.7755	0.00758307	0.00758253	0.533833	0.00764543	2.80917e-11	2.80558e-08	0.999055	0.000944712
MS_Patsopoulos_2019	chr8	78723008	rs1483572	LCL_meta	IL7	0.99757	379	78623016	78823008	5.74826	9.96516	11.3926	42.9231	56.0858	54.3003	0.0075888	0.00760438	0.533016	0.00774323	5.52552e-22	2.73367e-08	0.99757	0.00243038
MS_Patsopoulos_2019	chr8	78723008	rs1483572	LCL_meta	LINC02605	0.998009	379	78623016	78823008	5.74826	5.27604	11.3926	7.70097	21.0608	19.0784	0.00758931	0.00759026	0.533363	0.00772008	8.98402e-07	2.24002e-08	0.998009	0.00198969
MS_Patsopoulos_2019	chr8	78723008	rs1483572	LCL_meta	PKIA	0.995953	379	78623016	78823008	5.74826	13.0331	11.3926	77.7974	90.4686	89.1755	0.00761173	0.007611	0.531877	0.00787515	6.48116e-37	4.47529e-08	0.995953	0.00404648
MS_Patsopoulos_2019	chr10	79299578	rs1250551	LCL_meta	ZMIZ1	0.993944	390	79199760	79399282	6.66417	5.14101	15.4181	6.21288	22.5377	21.626	0.00763721	0.00763294	0.530345	0.00802531	1.15816e-05	1.16339e-09	0.993944	0.006044
MS_Patsopoulos_2019	chr10	92719350	rs1112718	LCL_meta	KIF11	0.998791	326	92619466	92819165	6.32925	4.91092	12.5904	6.08097	21.1203	18.6447	0.00758936	0.0075822	0.533724	0.00766305	2.80449e-06	4.17297e-09	0.998791	0.00120616
MS_Patsopoulos_2019	chr11	321138	rs35218683	LCL_meta	IFITM2	0.00392913	734	221195	419994	5.6545	21.5422	8.63214	221.247	228.557	229.878	0.00761134	0.0076104	0.00786278	0.531892	1.16944e-98	2.54234e-06	0.00392913	0.996068
MS_Patsopoulos_2019	chr11	47338861	rs2269434	LCL_meta	NR1H3	0.995465	371	47239709	47438755	5.01746	11.5813	6.40314	59.4224	66.9961	65.8107	0.00761799	0.00761762	0.531453	0.00790843	6.90588e-29	7.33078e-06	0.995465	0.00452753
MS_Patsopoulos_2019	chr11	65937961	rs531612	LCL_meta	BANF1	0.013063	266	65839924	66037917	5.33782	9.7402	9.11979	40.8493	49.7551	49.9663	0.00770966	0.00769644	0.00858941	0.52538	2.63889e-20	1.58725e-06	0.013063	0.986935
MS_Patsopoulos_2019	chr11	65937961	rs531612	LCL_meta	EIF1AD	0.997098	266	65839924	66037917	5.33782	8.93006	9.11979	32.6409	43.3503	41.7365	0.00760077	0.00760352	0.532613	0.00778405	1.9367e-17	3.17913e-07	0.997098	0.00290173
MS_Patsopoulos_2019	chr11	65937961	rs531612	LCL_meta	SART1	0.996618	266	65839924	66037917	5.33782	4.80838	9.11979	4.94356	15.5253	14.0513	0.00760873	0.00761464	0.532153	0.0078287	2.35458e-05	3.61859e-07	0.996618	0.00335759
MS_Patsopoulos_2019	chr12	6330843	rs1800693	LCL_meta	TNFRSF1A	0.999338	393	6231222	6430537	7.4387	4.93686	18.729	4.49134	26.2562	23.1744	0.00758185	0.00757714	0.53412	0.00761955	7.63532e-06	5.00311e-12	0.999338	0.000654072
MS_Patsopoulos_2019	chr12	9713753	rs7977720	LCL_meta	CLEC2B	0.999028	665	9614037	9813739	6.25555	4.78681	12.467	4.46055	19.6107	16.91	0.00758253	0.00758307	0.533833	0.00764543	1.12082e-05	3.73588e-09	0.999028	0.000960889
MS_Patsopoulos_2019	chr12	9713753	rs7977720	LCL_meta	ENSG00000272917	0.99659	665	9614037	9813739	6.25555	4.90684	12.467	6.7623	20.6836	19.2236	0.0076026	0.0076168	0.532273	0.00783383	3.84537e-06	1.28296e-08	0.99659	0.00340649
MS_Patsopoulos_2019	chr12	9713753	rs7977720	LCL_meta	LINC02390	0.999743	665	9614037	9813739	6.25555	5.96363	12.467	9.2556	25.6581	21.6469	0.00757796	0.00757585	0.534406	0.00759722	2.64701e-08	1.06641e-09	0.999743	0.000257406
MS_Patsopoulos_2019	chr12	57713053	rs701006	LCL_meta	EEF1AKMT3	0.990099	287	57613895	57809571	6.76325	27.9274	16.5615	379.681	396.688	396.232	0.00766788	0.00766908	0.527692	0.00833065	1.17759e-167	5.91132e-10	0.990099	0.00990075
MS_Patsopoulos_2019	chr12	57713053	rs701006	LCL_meta	OS9	0.0041588	287	57613895	57809571	6.76325	10.9819	16.5615	52.8232	68.1159	69.3834	0.00761619	0.00760998	0.00788642	0.531621	1.63695e-25	9.16093e-10	0.0041588	0.995841
MS_Patsopoulos_2019	chr12	57713053	rs701006	LCL_meta	PIP4K2C	0.00911902	287	57613895	57809571	6.76325	5.24239	16.5615	8.48336	24.5121	25.0431	0.00766472	0.00766545	0.00826655	0.528177	2.97996e-06	9.24648e-10	0.00911902	0.990878
MS_Patsopoulos_2019	chr12	57713053	rs701006	LCL_meta	TSFM	0.993732	287	57613895	57809571	6.76325	14.2311	16.5615	94.7181	112.146	111.268	0.00764299	0.00764268	0.530216	0.00804711	4.40729e-44	3.86488e-10	0.993732	0.0062676
MS_Patsopoulos_2019	chr12	57713053	rs701006	LCL_meta	TSPAN31	0.995123	287	57613895	57809571	6.76325	5.57944	16.5615	8.91273	26.5805	25.4656	0.00762374	0.0076197	0.531099	0.00793634	6.36301e-07	3.0313e-10	0.995123	0.00487684
MS_Patsopoulos_2019	chr12	123431550	rs35416759	LCL_meta	CDK2AP1	0.993684	291	123333016	123529704	5.21093	15.105	8.17306	105.8	114.831	113.96	0.00763375	0.00763774	0.530153	0.00804817	6.83232e-49	1.71232e-06	0.993684	0.00631405
MS_Patsopoulos_2019	chr12	123431550	rs35416759	LCL_meta	MPHOSPH9	0.996645	291	123333016	123529704	5.21093	6.20895	8.17306	13.1175	22.753	21.2783	0.00760576	0.00760626	0.532304	0.00782658	6.63022e-09	9.30869e-07	0.996645	0.00335357
MS_Patsopoulos_2019	chr14	75547955	rs34695601	LCL_meta	BATF	0.995948	380	75448898	75645026	5.53205	5.97647	7.48541	10.6102	19.3807	18.0884	0.00761173	0.007611	0.531877	0.00787515	9.72451e-08	2.21269e-06	0.995948	0.00405002
MS_Patsopoulos_2019	chr14	103445858	rs11622356	LCL_meta	MARK3	1.83003e-05	421	103345983	103545857	4.99563	10.4781	7.30022	45.8952	46.543	53.1954	0.0075756	0.00757309	0.00757864	0.534604	1.65708e-22	9.56721e-06	1.83003e-05	0.999972
MS_Patsopoulos_2019	chr16	11336257	rs28693671	LCL_meta	ENSG00000262703	0.989213	896	11236922	11436139	6.88289	4.9869	15.3102	6.26045	21.9504	21.5692	0.00768467	0.00767655	0.527083	0.0083999	1.88481e-05	2.21074e-09	0.989213	0.0107686
MS_Patsopoulos_2019	chr16	30091839	rs3809627	LCL_meta	ENSG00000275371	0.998698	195	29992435	30186830	5.52761	5.36897	8.00439	7.52486	17.879	15.4788	0.00758423	0.00758498	0.533734	0.00766216	7.30357e-07	4.52189e-07	0.998698	0.00130038
MS_Patsopoulos_2019	chr16	30091839	rs3809627	LCL_meta	GDPD3	0.996255	195	29992435	30186830	5.52761	10.0388	8.00439	43.2217	52.5665	51.1986	0.00761063	0.00761167	0.531975	0.00784982	6.32149e-22	1.24616e-06	0.996255	0.0037434
MS_Patsopoulos_2019	chr16	30091839	rs3809627	LCL_meta	TBX6	0.999865	195	29992435	30186830	5.52761	17.6528	8.00439	146.614	158.655	154.002	0.0075754	0.00757398	0.534446	0.00759025	5.30722e-68	8.36186e-08	0.999865	0.000135411
MS_Patsopoulos_2019	chr16	31263554	rs34550882	LCL_meta	BCKDK	0.99668	281	31164284	31363214	4.97557	3.93901	7.94448	3.1627	12.6187	11.0939	0.00761971	0.00761006	0.532383	0.00780999	0.000133137	1.11441e-06	0.99668	0.00318262
MS_Patsopoulos_2019	chr16	31263554	rs34550882	LCL_meta	ENSG00000261346	0.996459	281	31164284	31363214	4.97557	3.95606	7.94448	3.06772	12.4653	10.9982	0.00761874	0.00760533	0.532116	0.0078294	0.000155232	1.18104e-06	0.996459	0.00338112
MS_Patsopoulos_2019	chr16	85987899	rs35703946	LCL_meta	ENSG00000269667	0.999047	793	85888003	86086924	6.00292	9.91798	8.78427	39.8449	51.3108	48.6017	0.00758307	0.00758253	0.533833	0.00764543	4.81931e-21	1.48739e-07	0.999047	0.000952896
MS_Patsopoulos_2019	chr16	85987899	rs35703946	LCL_meta	ENSG00000285163	0.990046	793	85888003	86086924	6.00292	4.61498	8.78427	2.93191	12.2112	11.7143	0.00770101	0.00767715	0.527626	0.00830291	0.00046946	1.34463e-06	0.990046	0.00947889
MS_Patsopoulos_2019	chr16	85987899	rs35703946	LCL_meta	IRF8	0.996912	793	85888003	86086924	6.00292	9.66364	8.78427	37.5228	47.854	46.2998	0.00759795	0.00759764	0.532494	0.00780328	1.53197e-19	4.6366e-07	0.996912	0.00308743
MS_Patsopoulos_2019	chr17	36486677	rs4796224	LCL_meta	GGNBP2	0.0119925	122	36422736	36586440	5.23803	5.60989	8.38876	10.9393	19.037	19.3229	0.00768619	0.00769494	0.00850073	0.526184	2.57442e-07	3.30261e-06	0.0119925	0.988004
MS_Patsopoulos_2019	chr17	36486677	rs4796224	LCL_meta	ZNHIT3	0.998023	122	36422736	36586440	5.23803	25.9191	8.38876	326.632	336.9	334.911	0.00759074	0.00759	0.533371	0.00771866	3.03361e-145	4.9348e-07	0.998023	0.00197639
MS_Patsopoulos_2019	chr17	45330304	rs7222450	LCL_meta	FMNL1	0.992621	313	45230816	45430283	5.63224	4.02267	8.09777	2.79476	11.6686	10.8874	0.00766971	0.00765014	0.529305	0.00811132	0.000404638	2.00857e-06	0.992621	0.00696496
MS_Patsopoulos_2019	chr17	45330304	rs7222450	LCL_meta	MAP3K14	0.99574	313	45230816	45430283	5.63224	10.6476	8.09777	48.2824	57.6099	56.3649	0.00761819	0.00761077	0.531572	0.00789569	4.48307e-24	1.26796e-06	0.99574	0.00425854
MS_Patsopoulos_2019	chr17	47624914	rs11079784	LCL_meta	EFCAB13-DT	0.993812	168	47526662	47723292	6.59216	4.39757	17.1242	5.39565	23.4027	22.5077	0.00764042	0.00763569	0.53026	0.00804525	2.68652e-05	2.16414e-10	0.993812	0.00616068
MS_Patsopoulos_2019	chr17	47624914	rs11079784	LCL_meta	TBX21	0.985726	168	47526662	47723292	6.59216	5.86464	17.1242	11.1929	28.4456	28.3108	0.00770705	0.00770896	0.524649	0.00869371	1.75371e-07	4.65749e-10	0.985726	0.0142741
MS_Patsopoulos_2019	chr19	6668961	rs1077667	LCL_meta	TNFSF14	0.999976	730	6569178	6768842	7.15486	13.4586	16.7677	80.3055	102.779	96.3957	0.00757616	0.00757084	0.534577	0.00757357	6.27109e-40	2.46135e-12	0.999976	2.39449e-05
MS_Patsopoulos_2019	chr19	10481468	rs28834106	LCL_meta	ENSG00000267197	0.999055	442	10381551	10581453	6.61204	5.08781	13.361	5.51199	21.5634	18.8418	0.00758253	0.00758307	0.533833	0.00764543	3.88803e-06	1.51699e-09	0.999055	0.000941067
MS_Patsopoulos_2019	chr19	18191169	rs4808760	LCL_meta	MPV17L2	0.999612	525	18091302	18291069	7.22967	7.78251	19.0594	22.182	44.7817	41.1788	0.00757752	0.00757685	0.534336	0.00760749	9.56087e-14	2.17058e-12	0.999612	0.000387731
MS_Patsopoulos_2019	chr19	49333989	rs1465697	LCL_meta	CD37	0.999635	421	49234115	49432279	6.62473	11.0193	14.7652	51.8892	70.2196	66.5561	0.00757956	0.00757323	0.534296	0.00759984	1.16989e-26	1.55081e-10	0.999635	0.000364616
MS_Patsopoulos_2019	chr19	49333989	rs1465697	LCL_meta	ENSG00000268686	0.998563	421	49234115	49432279	6.62473	7.69786	14.7652	22.0568	39.091	36.7884	0.0075848	0.00758586	0.533586	0.00767754	3.86836e-13	5.67962e-10	0.998563	0.00143679
MS_Patsopoulos_2019	chr19	49333989	rs1465697	LCL_meta	KASH5	0.997728	421	49234115	49432279	6.62473	14.5731	14.7652	97.0926	113.686	111.833	0.00759593	0.00759819	0.533011	0.00773551	1.55682e-45	8.84555e-10	0.997728	0.00227158
MS_Patsopoulos_2019	chr19	49333989	rs1465697	LCL_meta	TEAD2	0.998714	421	49234115	49432279	6.62473	6.26588	14.7652	13.1821	30.3333	27.9208	0.00759357	0.00758252	0.533648	0.00766851	2.46314e-09	5.05069e-10	0.998714	0.00128579
MS_Patsopoulos_2019	chr20	46105671	rs6032662	LCL_meta	CD40	0.998048	340	46005911	46205582	7.30152	4.84066	20.0999	3.94481	26.048	24.027	0.00759197	0.0075924	0.533231	0.00771865	3.70985e-05	3.57529e-12	0.998048	0.00191454
MS_Patsopoulos_2019	chr20	63743088	rs6742	LCL_meta	LIME1	0.998304	695	63643195	63843007	5.27928	6.39533	6.07559	12.4951	20.7005	18.5575	0.0075919	0.00758801	0.533318	0.00770662	6.3259e-09	3.88009e-06	0.998304	0.00169229
MS_Patsopoulos_2019	chr22	21851064	rs9610458	LCL_meta	MAPK1	0.998365	275	21752246	21950844	6.91821	10.0752	17.2791	44.3769	63.7983	61.6238	0.00758644	0.00758605	0.533541	0.00768996	8.89462e-23	5.21819e-11	0.998365	0.00163548
MS_Patsopoulos_2019	chr22	21851064	rs9610458	LCL_meta	PPM1F	0.00185839	275	21752246	21950844	6.91821	8.70481	17.2791	30.8481	46.0766	48.1267	0.00759511	0.00759064	0.00771442	0.533316	5.69906e-16	4.4511e-10	0.00185839	0.998142
[truncated: 195 more rows]

## Sheet: Table E
Table E. Immune cell eQTL datasets analyzed in this study
Study	Cell type	Stimulated	Sample size
Schmiedel et al.22	Naïve B cell	naive	91
[truncated: 30 more rows]

## Sheet: Table F
Table F. Colocalization results for immune cell eQTLs and IMD GWAS
[truncated: 3,889 more rows]

[truncated: 4 more sheets: Table G, Table H, Table I, Table J]
